# Supplementary material for: Ensemble Methods with Voting Protocols Exhibit Superior Performance for Predicting Cancer Clinical Endpoints and Providing More Complete Coverage of Disease-Related Genes
Source: Int J Genomics. 2018 Jan 10;2018:8124950. doi: 10.1155/2018/8124950 (PMC5818887; doi:10.1155/2018/8124950)
Supplement: Supplementary Materials — As mentioned in Results, a file named “ModelingResults.xlsx” was provided as the supplementary material for recording the 5880 modeling results which were used for generating Figures 2 –12. [file 8124950.f1.xlsx]

## Sheet: BRCA-mRNA
#'_cv' means cross validation and '_ind' means independent test
name	VarSeleClass	NumOfVar	ModelingClass	TPR_cv	FPR_cv	ACC_cv	SPC_cv	PPV_cv	NPV_cv	FDR_cv	MCC_cv	F1_cv	TPR_ind	FPR_ind	ACC_ind	SPC_ind	PPV_ind	NPV_ind	FDR_ind	MCC_ind	F1_ind
DTNB	SymmerU	100*	rules	0.8978	0.1022	0.914	0.8978	0.907	0.907	0.093	0.8048	0.9022	0.8511	0.149	0.8652	0.8511	0.8475	0.8475	0.1526	0.6985	0.8492
RBFNetwork	ReliefF	50	functions	0.8804	0.1196	0.8943	0.8804	0.8814	0.8814	0.1186	0.7618	0.8809	0.8511	0.149	0.8652	0.8511	0.8475	0.8475	0.1526	0.6985	0.8492
J48graft	OneR	50	trees	0.9032	0.0968	0.914	0.9032	0.9032	0.9032	0.0968	0.8065	0.9032	0.8511	0.149	0.8723	0.8511	0.859	0.859	0.141	0.71	0.8548
J48	OneR	50	trees	0.8871	0.1129	0.8996	0.8871	0.8871	0.8871	0.1129	0.7742	0.8871	0.8511	0.149	0.8723	0.8511	0.859	0.859	0.141	0.71	0.8548
FT	OneR	50	trees	0.8495	0.1505	0.871	0.8495	0.8575	0.8575	0.1425	0.7069	0.8532	0.8564	0.1436	0.8865	0.8564	0.884	0.884	0.116	0.7399	0.8679
DecisionStump	OneR	50	trees	0.8992	0.1008	0.9086	0.8992	0.8961	0.8961	0.1039	0.7952	0.8976	0.867	0.133	0.8865	0.867	0.8754	0.8754	0.1247	0.7423	0.8709
RandomForest	OneR	50	trees	0.9005	0.0995	0.9086	0.9005	0.8954	0.8954	0.1046	0.7959	0.8979	0.8777	0.1223	0.8865	0.8777	0.8701	0.8701	0.1299	0.7477	0.8737
NBTree	OneR	50	trees	0.8737	0.1263	0.8925	0.8737	0.8822	0.8822	0.1178	0.7558	0.8777	0.883	0.117	0.8936	0.883	0.879	0.879	0.121	0.762	0.8809
LMT	OneR	50	trees	0.9113	0.0887	0.9176	0.9113	0.905	0.905	0.095	0.8162	0.908	0.8777	0.1223	0.8865	0.8777	0.8701	0.8701	0.1299	0.7477	0.8737
RBFNetwork	GainRatio	100*	functions	0.8575	0.1425	0.8746	0.8575	0.8595	0.8595	0.1405	0.717	0.8585	0.8244	0.1755	0.8652	0.8244	0.8663	0.8663	0.1337	0.6895	0.8401
REPTree	OneR	50	trees	0.8978	0.1022	0.9176	0.8978	0.9146	0.9146	0.0854	0.8123	0.9054	0.8458	0.1543	0.8582	0.8458	0.8389	0.8389	0.1612	0.6846	0.8421
RandomTree	OneR	50	trees	0.8642	0.1358	0.8763	0.8642	0.8595	0.8595	0.1405	0.7238	0.8618	0.8564	0.1436	0.8723	0.8564	0.8564	0.8564	0.1436	0.7128	0.8564
DecisionTable	SymmerU	100*	rules	0.8831	0.1169	0.9014	0.8831	0.893	0.893	0.107	0.776	0.8877	0.8724	0.1276	0.8936	0.8724	0.8854	0.8854	0.1146	0.7577	0.8784
RandomTree	SymmerU	100*	trees	0.8454	0.1546	0.8566	0.8454	0.8369	0.8369	0.1631	0.6822	0.8408	0.8989	0.1011	0.9078	0.8989	0.8949	0.8949	0.1052	0.7938	0.8969
REPTree	SymmerU	100*	trees	0.8911	0.1089	0.914	0.8911	0.913	0.913	0.087	0.8039	0.9007	0.8564	0.1436	0.8723	0.8564	0.8564	0.8564	0.1436	0.7128	0.8564
NBTree	SymmerU	100*	trees	0.8938	0.1062	0.9068	0.8938	0.896	0.896	0.104	0.7898	0.8949	0.8777	0.1223	0.8936	0.8777	0.8818	0.8818	0.1182	0.7595	0.8797
RandomForest	SymmerU	100*	trees	0.9113	0.0887	0.9211	0.9113	0.9113	0.9113	0.0887	0.8226	0.9113	0.883	0.117	0.8936	0.883	0.879	0.879	0.121	0.762	0.8809
LADTree	SymmerU	100*	trees	0.8696	0.1304	0.8835	0.8696	0.8686	0.8686	0.1314	0.7383	0.8691	0.8777	0.1223	0.8936	0.8777	0.8818	0.8818	0.1182	0.7595	0.8797
LMT	SymmerU	100*	trees	0.9019	0.0981	0.9104	0.9019	0.8977	0.8977	0.1023	0.7996	0.8997	0.8777	0.1223	0.8936	0.8777	0.8818	0.8818	0.1182	0.7595	0.8797
J48	SymmerU	100*	trees	0.8642	0.1358	0.8799	0.8642	0.8652	0.8652	0.1348	0.7295	0.8647	0.8351	0.1649	0.8511	0.8351	0.8317	0.8317	0.1684	0.6668	0.8333
J48graft	SymmerU	100*	trees	0.9005	0.0995	0.9176	0.9005	0.9122	0.9122	0.0878	0.8127	0.906	0.8617	0.1383	0.8794	0.8617	0.8657	0.8657	0.1343	0.7274	0.8637
DecisionStump	SymmerU	100*	trees	0.8992	0.1008	0.9086	0.8992	0.8961	0.8961	0.1039	0.7952	0.8976	0.867	0.133	0.8865	0.867	0.8754	0.8754	0.1247	0.7423	0.8709
FT	SymmerU	100*	trees	0.8535	0.1465	0.8638	0.8535	0.8447	0.8447	0.1553	0.6982	0.8488	0.8245	0.1756	0.8582	0.8245	0.8497	0.8497	0.1503	0.6736	0.8348
LogitBoost	SymmerU	50	meta	0.9032	0.0968	0.914	0.9032	0.9032	0.9032	0.0968	0.8065	0.9032	0.8617	0.1383	0.8794	0.8617	0.8657	0.8657	0.1343	0.7274	0.8637
FilteredClassifier	SymmerU	50	meta	0.8925	0.1075	0.9104	0.8925	0.9039	0.9039	0.0961	0.7963	0.8978	0.8671	0.1329	0.8794	0.8671	0.8633	0.8633	0.1367	0.7303	0.8651
MultiClassClassifier	SymmerU	50	meta	0.8642	0.1358	0.8746	0.8642	0.8569	0.8569	0.1431	0.7211	0.8603	0.8617	0.1383	0.8652	0.8617	0.8453	0.8453	0.1548	0.7068	0.8522
Ridor	SymmerU	30	rules	0.875	0.125	0.8925	0.875	0.8813	0.8813	0.1187	0.7563	0.878	0.8564	0.1437	0.8794	0.8564	0.8689	0.8689	0.1311	0.7252	0.8621
DecisionTable	SymmerU	30	rules	0.9032	0.0968	0.9158	0.9032	0.9066	0.9066	0.0934	0.8098	0.9049	0.8671	0.1329	0.8794	0.8671	0.8633	0.8633	0.1367	0.7303	0.8651
Bagging	SymmerU	50	meta	0.9086	0.0914	0.9211	0.9086	0.9131	0.9131	0.0869	0.8217	0.9108	0.883	0.117	0.8936	0.883	0.879	0.879	0.121	0.762	0.8809
NNge	SymmerU	30	rules	0.9046	0.0954	0.9229	0.9046	0.9203	0.9203	0.0797	0.8247	0.9117	0.8777	0.1223	0.8936	0.8777	0.8818	0.8818	0.1182	0.7595	0.8797
Decorate	SymmerU	50	meta	0.9059	0.0941	0.9194	0.9059	0.9116	0.9116	0.0884	0.8175	0.9087	0.8724	0.1276	0.8865	0.8724	0.8724	0.8724	0.1276	0.7447	0.8724
BFTree	SymmerU	30	trees	0.8844	0.1156	0.9014	0.8844	0.8921	0.8921	0.1079	0.7764	0.888	0.867	0.133	0.8865	0.867	0.8754	0.8754	0.1247	0.7423	0.8709
HyperPipes	SymmerU	50	misc	0.8495	0.1505	0.8351	0.8495	0.8175	0.8175	0.1825	0.6662	0.825	0.8138	0.1862	0.7943	0.8138	0.7814	0.7814	0.2187	0.5943	0.7846
NNge	ReliefF	10	rules	0.8239	0.1761	0.8638	0.8239	0.8632	0.8632	0.1368	0.686	0.8387	0.8298	0.1702	0.8511	0.8298	0.8334	0.8334	0.1666	0.6632	0.8316
VFI	ReliefF	100*	misc	0.754	0.246	0.7491	0.754	0.7303	0.7303	0.2697	0.4838	0.7342	0.7341	0.266	0.766	0.7341	0.7367	0.7367	0.2633	0.4706	0.7353
Bagging	GainRatio	100*	meta	0.9032	0.0968	0.914	0.9032	0.9032	0.9032	0.0968	0.8065	0.9032	0.883	0.117	0.8936	0.883	0.879	0.879	0.121	0.762	0.8809
HyperPipes	ReliefF	100*	misc	0.7419	0.2581	0.6935	0.7419	0.7187	0.7187	0.2813	0.46	0.6903	0.75	0.25	0.6879	0.75	0.732	0.732	0.268	0.4817	0.6867
ConjunctiveRule	InfoGain	50	rules	0.8844	0.1156	0.9014	0.8844	0.8921	0.8921	0.1079	0.7764	0.888	0.867	0.133	0.8865	0.867	0.8754	0.8754	0.1247	0.7423	0.8709
LibSVM	ReliefF	10	functions	0.539	0.461	0.6918	0.539	0.811	0.811	0.189	0.2202	0.4802	0.5691	0.4309	0.7092	0.5691	0.7871	0.7871	0.2129	0.2818	0.537
LADTree	GainRatio	30	trees	0.8898	0.1102	0.8996	0.8898	0.8857	0.8857	0.1143	0.7755	0.8877	0.8245	0.1755	0.8369	0.8245	0.8151	0.8151	0.185	0.6395	0.8193
Logistic	ReliefF	10	functions	0.8696	0.1304	0.8763	0.8696	0.858	0.858	0.142	0.7275	0.8632	0.8777	0.1223	0.8865	0.8777	0.8701	0.8701	0.1299	0.7477	0.8737
NaiveBayes	ReliefF	10	bayes	0.875	0.125	0.8638	0.875	0.8449	0.8449	0.1551	0.7192	0.8541	0.8511	0.1489	0.8511	0.8511	0.8301	0.8301	0.1699	0.6809	0.8381
BayesNet	ReliefF	10	bayes	0.8763	0.1237	0.8853	0.8763	0.8688	0.8688	0.1312	0.7451	0.8723	0.8617	0.1383	0.8794	0.8617	0.8657	0.8657	0.1343	0.7274	0.8637
BayesianLogisticRegression	ReliefF	10	bayes	0.3723	0.6277	0.3136	0.3723	0.3597	0.3597	0.6403	-0.2677	0.3118	0.3351	0.6649	0.2766	0.3351	0.3139	0.3139	0.6862	-0.3504	0.2737
DMNBtext	ReliefF	10	bayes	0.4946	0.5054	0.6577	0.4946	0.4036	0.4036	0.5964	-0.0455	0.4017	0.5213	0.4788	0.6738	0.5213	0.6383	0.6383	0.3618	0.1085	0.4577
ComplementNaiveBayes	ReliefF	10	bayes	0.8051	0.1949	0.8333	0.8051	0.815	0.815	0.185	0.62	0.8096	0.7607	0.2394	0.8014	0.7607	0.7809	0.7809	0.2192	0.5411	0.7688
NaiveBayesMultinomialUpdateable	ReliefF	10	bayes	0.7769	0.2231	0.819	0.7769	0.8043	0.8043	0.1957	0.5805	0.7874	0.7393	0.2607	0.7872	0.7393	0.7658	0.7658	0.2342	0.5045	0.7491
NaiveBayesMultinomial	ReliefF	10	bayes	0.7997	0.2003	0.8297	0.7997	0.8114	0.8114	0.1886	0.611	0.8049	0.7607	0.2394	0.8014	0.7607	0.7809	0.7809	0.2192	0.5411	0.7688
J48	GainRatio	50	trees	0.8871	0.1129	0.9032	0.8871	0.8937	0.8937	0.1063	0.7807	0.8902	0.8511	0.149	0.8652	0.8511	0.8475	0.8475	0.1526	0.6985	0.8492
MultiClassClassifier	GainRatio	30	meta	0.8777	0.1223	0.8978	0.8777	0.8899	0.8899	0.1101	0.7675	0.8833	0.8724	0.1276	0.8865	0.8724	0.8724	0.8724	0.1276	0.7447	0.8724
LWL	InfoGain	10	lazy	0.8992	0.1008	0.9086	0.8992	0.8961	0.8961	0.1039	0.7952	0.8976	0.8617	0.1383	0.8794	0.8617	0.8657	0.8657	0.1343	0.7274	0.8637
AdaBoostM1	InfoGain	10	meta	0.8992	0.1008	0.9086	0.8992	0.8961	0.8961	0.1039	0.7952	0.8976	0.867	0.133	0.8865	0.867	0.8754	0.8754	0.1247	0.7423	0.8709
J48graft	GainRatio	50	trees	0.9153	0.0847	0.9265	0.9153	0.9188	0.9188	0.0812	0.8341	0.917	0.8564	0.1436	0.8723	0.8564	0.8564	0.8564	0.1436	0.7128	0.8564
VotedPerceptron	InfoGain	10	functions	0.5538	0.4462	0.6989	0.5538	0.7689	0.7689	0.2311	0.2405	0.5109	0.5	0.5	0.6667	0.5	0.3334	0.3334	0.6667	-1	0.4
IB1	InfoGain	10	lazy	0.8522	0.1478	0.8692	0.8522	0.8531	0.8531	0.1469	0.7053	0.8526	0.8351	0.1649	0.8511	0.8351	0.8317	0.8317	0.1684	0.6668	0.8333
IBk	InfoGain	10	lazy	0.8522	0.1478	0.8692	0.8522	0.8531	0.8531	0.1469	0.7053	0.8526	0.8351	0.1649	0.8511	0.8351	0.8317	0.8317	0.1684	0.6668	0.8333
KStar	InfoGain	10	lazy	0.8804	0.1196	0.8799	0.8804	0.8608	0.8608	0.1392	0.7409	0.8687	0.8564	0.1436	0.8652	0.8564	0.8461	0.8461	0.154	0.7024	0.8507
MultilayerPerceptron	InfoGain	10	functions	0.9113	0.0887	0.9211	0.9113	0.9113	0.9113	0.0887	0.8226	0.9113	0.8883	0.1117	0.8936	0.8883	0.8771	0.8771	0.123	0.7652	0.8822
RBFNetwork	InfoGain	10	functions	0.9059	0.0941	0.914	0.9059	0.9017	0.9017	0.0983	0.8076	0.9037	0.8883	0.1117	0.9007	0.8883	0.8883	0.8883	0.1117	0.7766	0.8883
SimpleLogistic	InfoGain	10	functions	0.9073	0.0927	0.9104	0.9073	0.8953	0.8953	0.1047	0.8025	0.9007	0.883	0.117	0.8936	0.883	0.879	0.879	0.121	0.762	0.8809
SPegasos	InfoGain	10	functions	0.5954	0.4046	0.7276	0.5954	0.8187	0.8187	0.1813	0.3488	0.5783	0.5904	0.4096	0.7234	0.5904	0.805	0.805	0.1951	0.3321	0.5713
MultiBoostAB	SymmerU	50	meta	0.8992	0.1008	0.9122	0.8992	0.9025	0.9025	0.0975	0.8017	0.9008	0.867	0.133	0.8865	0.867	0.8754	0.8754	0.1247	0.7423	0.8709
Bagging	ReliefF	100*	meta	0.8777	0.1223	0.8961	0.8777	0.8864	0.8864	0.1136	0.764	0.8818	0.8724	0.1276	0.8865	0.8724	0.8724	0.8724	0.1276	0.7447	0.8724
ADTree	ReliefF	10	trees	0.8306	0.1694	0.8477	0.8306	0.828	0.828	0.172	0.6587	0.8293	0.8724	0.1276	0.8794	0.8724	0.8616	0.8616	0.1385	0.7338	0.8664
NBTree	GainRatio	50	trees	0.8723	0.1277	0.8907	0.8723	0.8797	0.8797	0.1203	0.752	0.8758	0.8617	0.1383	0.8794	0.8617	0.8657	0.8657	0.1343	0.7274	0.8637
LADTree	OneR	50	trees	0.8844	0.1156	0.8961	0.8844	0.8824	0.8824	0.1176	0.7668	0.8834	0.8458	0.1543	0.8652	0.8458	0.8495	0.8495	0.1505	0.6953	0.8476
RandomForest	GainRatio	50	trees	0.9086	0.0914	0.9176	0.9086	0.9064	0.9064	0.0936	0.815	0.9075	0.8617	0.1383	0.8723	0.8617	0.8545	0.8545	0.1456	0.7161	0.8579
MultiBoostAB	GainRatio	30	meta	0.9005	0.0995	0.914	0.9005	0.905	0.905	0.095	0.8055	0.9027	0.8671	0.1329	0.8794	0.8671	0.8633	0.8633	0.1367	0.7303	0.8651
SPegasos	ReliefF	50	functions	0.5054	0.4946	0.6703	0.5054	0.8345	0.8345	0.1655	0.0848	0.4115	0.5	0.5	0.6667	0.5	0.3334	0.3334	0.6667	-1	0.4
ZeroR	OneR	100*	rules	0.5	0.5	0.6667	0.5	-0.1667	-0.1667	0.6667	-1	0.4	0.5	0.5	0.6667	0.5	0.3334	0.3334	0.6667	-1	0.4
LMT	GainRatio	50	trees	0.9046	0.0954	0.9158	0.9046	0.9057	0.9057	0.0943	0.8102	0.9051	0.8724	0.1276	0.8865	0.8724	0.8724	0.8724	0.1276	0.7447	0.8724
AdaBoostM1	SymmerU	50	meta	0.8992	0.1008	0.9086	0.8992	0.8961	0.8961	0.1039	0.7952	0.8976	0.867	0.133	0.8865	0.867	0.8754	0.8754	0.1247	0.7423	0.8709
ZeroR	ReliefF	10	rules	0.5	0.5	0.6667	0.5	-0.1667	-0.1667	0.6667	-1	0.4	0.5	0.5	0.6667	0.5	0.3334	0.3334	0.6667	-1	0.4
RandomForest	SymmerU	30	trees	0.9126	0.0874	0.9211	0.9126	0.9105	0.9105	0.0895	0.8231	0.9115	0.8724	0.1276	0.8865	0.8724	0.8724	0.8724	0.1276	0.7447	0.8724
LogitBoost	GainRatio	100*	meta	0.8884	0.1116	0.9032	0.8884	0.8928	0.8928	0.1072	0.7812	0.8905	0.8617	0.1383	0.8794	0.8617	0.8657	0.8657	0.1343	0.7274	0.8637
DMNBtext	SymmerU	50	bayes	0.8723	0.1277	0.8978	0.8723	0.8945	0.8945	0.1055	0.7665	0.8819	0.8617	0.1383	0.8794	0.8617	0.8657	0.8657	0.1343	0.7274	0.8637
NBTree	ReliefF	10	trees	0.8616	0.1384	0.8746	0.8616	0.8578	0.8578	0.1422	0.7193	0.8596	0.883	0.117	0.9007	0.883	0.8917	0.8917	0.1083	0.7746	0.8871
RandomForest	ReliefF	10	trees	0.8642	0.1358	0.8728	0.8642	0.8544	0.8544	0.1456	0.7186	0.8589	0.8564	0.1436	0.8723	0.8564	0.8564	0.8564	0.1436	0.7128	0.8564
BFTree	GainRatio	50	trees	0.8925	0.1075	0.914	0.8925	0.9117	0.9117	0.0883	0.8039	0.901	0.867	0.133	0.8865	0.867	0.8754	0.8754	0.1247	0.7423	0.8709
LMT	ReliefF	10	trees	0.8763	0.1237	0.8853	0.8763	0.8688	0.8688	0.1312	0.7451	0.8723	0.8777	0.1223	0.8865	0.8777	0.8701	0.8701	0.1299	0.7477	0.8737
J48	ReliefF	10	trees	0.8522	0.1478	0.8602	0.8522	0.8403	0.8403	0.1597	0.6924	0.8455	0.8936	0.1064	0.8936	0.8936	0.8758	0.8758	0.1243	0.7692	0.8833
J48graft	ReliefF	10	trees	0.8535	0.1465	0.8638	0.8535	0.8447	0.8447	0.1553	0.6982	0.8488	0.8829	0.1171	0.8865	0.8829	0.8686	0.8686	0.1314	0.7515	0.8749
DecisionStump	ReliefF	10	trees	0.8562	0.1438	0.862	0.8562	0.842	0.842	0.158	0.698	0.8481	0.8883	0.1117	0.8865	0.8883	0.8679	0.8679	0.1322	0.7558	0.8761
FT	ReliefF	10	trees	0.8602	0.1398	0.8763	0.8602	0.8612	0.8612	0.1388	0.7214	0.8607	0.8777	0.1223	0.8865	0.8777	0.8701	0.8701	0.1299	0.7477	0.8737
NNge	GainRatio	50	rules	0.9019	0.0981	0.9122	0.9019	0.9008	0.9008	0.0992	0.8027	0.9013	0.8617	0.1383	0.8794	0.8617	0.8657	0.8657	0.1343	0.7274	0.8637
DTNB	GainRatio	50	rules	0.9073	0.0927	0.9229	0.9073	0.9179	0.9179	0.0821	0.825	0.9122	0.8511	0.149	0.8723	0.8511	0.859	0.859	0.141	0.71	0.8548
DecisionTable	GainRatio	50	rules	0.9032	0.0968	0.9194	0.9032	0.9137	0.9137	0.0863	0.8169	0.9081	0.8511	0.149	0.8723	0.8511	0.859	0.859	0.141	0.71	0.8548
ConjunctiveRule	GainRatio	50	rules	0.8844	0.1156	0.9014	0.8844	0.8921	0.8921	0.1079	0.7764	0.888	0.867	0.133	0.8865	0.867	0.8754	0.8754	0.1247	0.7423	0.8709
ZeroR	GainRatio	50	rules	0.5	0.5	0.6667	0.5	-0.1667	-0.1667	0.6667	-1	0.4	0.5	0.5	0.6667	0.5	0.3334	0.3334	0.6667	-1	0.4
BFTree	OneR	100*	trees	0.8911	0.1089	0.914	0.8911	0.913	0.913	0.087	0.8039	0.9007	0.8564	0.1437	0.8794	0.8564	0.8689	0.8689	0.1311	0.7252	0.8621
PART	GainRatio	50	rules	0.9019	0.0981	0.9104	0.9019	0.8977	0.8977	0.1023	0.7996	0.8997	0.8511	0.149	0.8652	0.8511	0.8475	0.8475	0.1526	0.6985	0.8492
OneR	GainRatio	50	rules	0.8898	0.1102	0.914	0.8898	0.9145	0.9145	0.0855	0.8039	0.9004	0.867	0.133	0.8865	0.867	0.8754	0.8754	0.1247	0.7423	0.8709
IB1	GainRatio	50	lazy	0.8387	0.1613	0.862	0.8387	0.8475	0.8475	0.1525	0.6862	0.8428	0.8298	0.1702	0.8652	0.8298	0.8607	0.8607	0.1394	0.6897	0.8421
KStar	SymmerU	50	lazy	0.7218	0.2782	0.7366	0.7218	0.7088	0.7088	0.2912	0.4304	0.7133	0.8032	0.1969	0.8085	0.8032	0.7852	0.7852	0.2149	0.588	0.7917
BayesNet	OneR	50	bayes	0.914	0.086	0.9247	0.914	0.9162	0.9162	0.0838	0.8302	0.9151	0.883	0.117	0.8936	0.883	0.879	0.879	0.121	0.762	0.8809
KStar	GainRatio	100*	lazy	0.7204	0.2796	0.7832	0.7204	0.7698	0.7698	0.2302	0.4878	0.7344	0.7341	0.266	0.8014	0.7341	0.8033	0.8033	0.1968	0.5328	0.7519
NaiveBayes	OneR	50	bayes	0.8898	0.1102	0.8853	0.8898	0.8664	0.8664	0.1336	0.7558	0.8753	0.8936	0.1064	0.8936	0.8936	0.8758	0.8758	0.1243	0.7692	0.8833
Ridor	ReliefF	30	rules	0.8427	0.1573	0.8692	0.8427	0.8584	0.8584	0.1416	0.7009	0.8497	0.8245	0.1756	0.8582	0.8245	0.8497	0.8497	0.1503	0.6736	0.8348
IBk	GainRatio	50	lazy	0.8387	0.1613	0.862	0.8387	0.8475	0.8475	0.1525	0.6862	0.8428	0.8298	0.1702	0.8652	0.8298	0.8607	0.8607	0.1394	0.6897	0.8421
OneR	ReliefF	50	rules	0.8427	0.1573	0.8692	0.8427	0.8584	0.8584	0.1416	0.7009	0.8497	0.8138	0.1862	0.8511	0.8138	0.8432	0.8432	0.1568	0.6564	0.8255
RBFNetwork	GainRatio	50	functions	0.8454	0.1546	0.8835	0.8454	0.8889	0.8889	0.1111	0.733	0.8618	0.8458	0.1543	0.8794	0.8458	0.8781	0.8781	0.1219	0.7231	0.8587
END	SymmerU	50	meta	0.8737	0.1263	0.8889	0.8737	0.8757	0.8757	0.1243	0.7494	0.8747	0.8298	0.1702	0.8511	0.8298	0.8334	0.8334	0.1666	0.6632	0.8316
ZeroR	ReliefF	50	rules	0.5	0.5	0.6667	0.5	-0.1667	-0.1667	0.6667	-1	0.4	0.5	0.5	0.6667	0.5	0.3334	0.3334	0.6667	-1	0.4
NaiveBayesMultinomialUpdateable	OneR	50	bayes	0.8656	0.1344	0.8584	0.8656	0.8386	0.8386	0.1614	0.7037	0.8476	0.8511	0.149	0.8582	0.8511	0.8379	0.8379	0.1621	0.6888	0.8436
Decorate	ReliefF	30	meta	0.871	0.129	0.8853	0.871	0.871	0.871	0.129	0.7419	0.871	0.8564	0.1437	0.8794	0.8564	0.8689	0.8689	0.1311	0.7252	0.8621
PART	ReliefF	30	rules	0.8683	0.1317	0.8853	0.8683	0.8724	0.8724	0.1276	0.7406	0.8703	0.8405	0.1596	0.8652	0.8405	0.8524	0.8524	0.1476	0.6927	0.8459
ComplementNaiveBayes	OneR	50	bayes	0.8495	0.1505	0.8297	0.8495	0.8148	0.8148	0.1852	0.6633	0.8208	0.8085	0.1915	0.8014	0.8085	0.7817	0.7817	0.2183	0.5896	0.7884
BayesNet	SymmerU	50	bayes	0.9099	0.0901	0.9194	0.9099	0.9089	0.9089	0.0911	0.8188	0.9094	0.8777	0.1223	0.8936	0.8777	0.8818	0.8818	0.1182	0.7595	0.8797
DMNBtext	OneR	50	bayes	0.8737	0.1263	0.8996	0.8737	0.8973	0.8973	0.1027	0.7706	0.8838	0.8351	0.1649	0.8652	0.8351	0.8561	0.8561	0.144	0.6908	0.8441
MultilayerPerceptron	ReliefF	50	functions	0.9005	0.0995	0.9158	0.9005	0.9085	0.9085	0.0915	0.809	0.9043	0.8245	0.1755	0.844	0.8245	0.8245	0.8245	0.1755	0.6489	0.8245
Logistic	SymmerU	100*	functions	0.8078	0.1922	0.8154	0.8078	0.792	0.792	0.208	0.5996	0.7982	0.8457	0.1543	0.8369	0.8457	0.8173	0.8173	0.1827	0.6624	0.8256
NaiveBayes	SymmerU	100*	bayes	0.9005	0.0995	0.9014	0.9005	0.8846	0.8846	0.1154	0.7849	0.8915	0.8883	0.1117	0.8936	0.8883	0.8771	0.8771	0.123	0.7652	0.8822
BayesNet	SymmerU	100*	bayes	0.9046	0.0954	0.9158	0.9046	0.9057	0.9057	0.0943	0.8102	0.9051	0.8777	0.1223	0.8936	0.8777	0.8818	0.8818	0.1182	0.7595	0.8797
BayesianLogisticRegression	SymmerU	100*	bayes	0.4718	0.5282	0.362	0.4718	0.4536	0.4536	0.5464	-0.0724	0.3425	0.4628	0.5373	0.3404	0.4628	0.422	0.422	0.578	-0.1078	0.3092
DMNBtext	SymmerU	100*	bayes	0.871	0.129	0.8943	0.871	0.8879	0.8879	0.1121	0.7586	0.8785	0.8617	0.1383	0.8794	0.8617	0.8657	0.8657	0.1343	0.7274	0.8637
KStar	ReliefF	10	lazy	0.828	0.172	0.8548	0.828	0.8407	0.8407	0.1593	0.6685	0.8337	0.8245	0.1755	0.8511	0.8245	0.8359	0.8359	0.1641	0.6602	0.8297
NaiveBayesMultinomialUpdateable	SymmerU	100*	bayes	0.8871	0.1129	0.9014	0.8871	0.8903	0.8903	0.1097	0.7774	0.8887	0.8351	0.1649	0.8652	0.8351	0.8561	0.8561	0.144	0.6908	0.8441
NaiveBayesMultinomial	SymmerU	100*	bayes	0.8938	0.1062	0.9032	0.8938	0.8897	0.8897	0.1103	0.7835	0.8917	0.8564	0.1437	0.8794	0.8564	0.8689	0.8689	0.1311	0.7252	0.8621
LibSVM	SymmerU	100*	functions	0.5	0.5	0.6667	0.5	-0.1667	-0.1667	0.6667	-1	0.4	0.5	0.5	0.6667	0.5	0.3334	0.3334	0.6667	-1	0.4
IBk	ReliefF	10	lazy	0.8038	0.1962	0.8262	0.8038	0.8046	0.8046	0.1954	0.6083	0.8042	0.75	0.25	0.7943	0.75	0.7734	0.7734	0.2266	0.5229	0.759
FilteredClassifier	OneR	100*	meta	0.8763	0.1237	0.8943	0.8763	0.8838	0.8838	0.1162	0.7601	0.8799	0.8458	0.1543	0.8652	0.8458	0.8495	0.8495	0.1505	0.6953	0.8476
LogitBoost	OneR	100*	meta	0.8992	0.1008	0.9122	0.8992	0.9025	0.9025	0.0975	0.8017	0.9008	0.8724	0.1276	0.8865	0.8724	0.8724	0.8724	0.1276	0.7447	0.8724
REPTree	GainRatio	100*	trees	0.8925	0.1075	0.905	0.8925	0.8935	0.8935	0.1065	0.786	0.893	0.8617	0.1383	0.8652	0.8617	0.8453	0.8453	0.1548	0.7068	0.8522
RandomTree	GainRatio	100*	trees	0.8535	0.1465	0.8728	0.8535	0.8584	0.8584	0.1416	0.7119	0.8559	0.8352	0.1649	0.8582	0.8352	0.8427	0.8427	0.1573	0.6778	0.8387
Bagging	OneR	100*	meta	0.9059	0.0941	0.9176	0.9059	0.9081	0.9081	0.0919	0.814	0.907	0.883	0.117	0.8936	0.883	0.879	0.879	0.121	0.762	0.8809
Dagging	OneR	100*	meta	0.9073	0.0927	0.914	0.9073	0.901	0.901	0.099	0.8082	0.904	0.883	0.117	0.8936	0.883	0.879	0.879	0.121	0.762	0.8809
Decorate	OneR	100*	meta	0.9099	0.0901	0.9229	0.9099	0.9157	0.9157	0.0843	0.8256	0.9127	0.867	0.133	0.8865	0.867	0.8754	0.8754	0.1247	0.7423	0.8709
END	OneR	100*	meta	0.871	0.129	0.8871	0.871	0.874	0.874	0.126	0.745	0.8725	0.7978	0.2022	0.8298	0.7978	0.8122	0.8122	0.1878	0.61	0.8041
J48graft	GainRatio	100*	trees	0.9126	0.0874	0.9283	0.9126	0.9247	0.9247	0.0753	0.8372	0.9182	0.8724	0.1276	0.8865	0.8724	0.8724	0.8724	0.1276	0.7447	0.8724
J48	GainRatio	100*	trees	0.8871	0.1129	0.8996	0.8871	0.8871	0.8871	0.1129	0.7742	0.8871	0.8458	0.1543	0.8582	0.8458	0.8389	0.8389	0.1612	0.6846	0.8421
FT	GainRatio	100*	trees	0.8629	0.1371	0.8835	0.8629	0.8723	0.8723	0.1277	0.7352	0.8673	0.8564	0.1437	0.8794	0.8564	0.8689	0.8689	0.1311	0.7252	0.8621
DecisionStump	GainRatio	100*	trees	0.8992	0.1008	0.9086	0.8992	0.8961	0.8961	0.1039	0.7952	0.8976	0.867	0.133	0.8865	0.867	0.8754	0.8754	0.1247	0.7423	0.8709
RandomForest	GainRatio	100*	trees	0.9059	0.0941	0.9176	0.9059	0.9081	0.9081	0.0919	0.814	0.907	0.883	0.117	0.8936	0.883	0.879	0.879	0.121	0.762	0.8809
NBTree	GainRatio	100*	trees	0.8696	0.1304	0.8835	0.8696	0.8686	0.8686	0.1314	0.7383	0.8691	0.8564	0.1436	0.8723	0.8564	0.8564	0.8564	0.1436	0.7128	0.8564
LMT	GainRatio	100*	trees	0.8898	0.1102	0.905	0.8898	0.8952	0.8952	0.1048	0.785	0.8924	0.867	0.133	0.8865	0.867	0.8754	0.8754	0.1247	0.7423	0.8709
LWL	GainRatio	50	lazy	0.8978	0.1022	0.9086	0.8978	0.8968	0.8968	0.1032	0.7946	0.8973	0.8617	0.1383	0.8794	0.8617	0.8657	0.8657	0.1343	0.7274	0.8637
ZeroR	SymmerU	100*	rules	0.5	0.5	0.6667	0.5	-0.1667	-0.1667	0.6667	-1	0.4	0.5	0.5	0.6667	0.5	0.3334	0.3334	0.6667	-1	0.4
Logistic	GainRatio	30	functions	0.8777	0.1223	0.8978	0.8777	0.8899	0.8899	0.1101	0.7675	0.8833	0.8724	0.1276	0.8865	0.8724	0.8724	0.8724	0.1276	0.7447	0.8724
PART	SymmerU	100*	rules	0.875	0.125	0.8853	0.875	0.8692	0.8692	0.1308	0.7442	0.872	0.8458	0.1543	0.844	0.8458	0.823	0.823	0.177	0.6683	0.8311
OneR	SymmerU	100*	rules	0.8898	0.1102	0.914	0.8898	0.9145	0.9145	0.0855	0.8039	0.9004	0.867	0.133	0.8865	0.867	0.8754	0.8754	0.1247	0.7423	0.8709
ComplementNaiveBayes	GainRatio	30	bayes	0.8871	0.1129	0.9068	0.8871	0.9009	0.9009	0.0991	0.7878	0.8934	0.867	0.133	0.8865	0.867	0.8754	0.8754	0.1247	0.7423	0.8709
DMNBtext	GainRatio	30	bayes	0.836	0.164	0.8746	0.836	0.8768	0.8768	0.1232	0.7116	0.8515	0.8298	0.1702	0.8582	0.8298	0.8458	0.8458	0.1542	0.6754	0.8368
NaiveBayesMultinomial	GainRatio	30	bayes	0.8871	0.1129	0.9068	0.8871	0.9009	0.9009	0.0991	0.7878	0.8934	0.867	0.133	0.8865	0.867	0.8754	0.8754	0.1247	0.7423	0.8709
ConjunctiveRule	SymmerU	100*	rules	0.8844	0.1156	0.9014	0.8844	0.8921	0.8921	0.1079	0.7764	0.888	0.867	0.133	0.8865	0.867	0.8754	0.8754	0.1247	0.7423	0.8709
ComplementNaiveBayes	GainRatio	50	bayes	0.8602	0.1398	0.8835	0.8602	0.8742	0.8742	0.1258	0.7343	0.8665	0.8458	0.1543	0.8723	0.8458	0.8625	0.8625	0.1375	0.708	0.8532
NaiveBayesMultinomialUpdateable	GainRatio	50	bayes	0.8441	0.1559	0.8728	0.8441	0.8646	0.8646	0.1354	0.7084	0.8529	0.8351	0.1649	0.8652	0.8351	0.8561	0.8561	0.144	0.6908	0.8441
NaiveBayesMultinomial	GainRatio	50	bayes	0.8602	0.1398	0.8835	0.8602	0.8742	0.8742	0.1258	0.7343	0.8665	0.8458	0.1543	0.8723	0.8458	0.8625	0.8625	0.1375	0.708	0.8532
Logistic	GainRatio	50	functions	0.8401	0.1599	0.871	0.8401	0.8641	0.8641	0.1359	0.7038	0.8501	0.8777	0.1223	0.8936	0.8777	0.8818	0.8818	0.1182	0.7595	0.8797
NaiveBayes	GainRatio	50	bayes	0.8441	0.1559	0.8853	0.8441	0.8958	0.8958	0.1042	0.7381	0.8628	0.7979	0.2021	0.844	0.7979	0.842	0.842	0.158	0.6383	0.8135
BFTree	SymmerU	100*	trees	0.8871	0.1129	0.9068	0.8871	0.9009	0.9009	0.0991	0.7878	0.8934	0.8245	0.1755	0.844	0.8245	0.8245	0.8245	0.1755	0.6489	0.8245
BayesianLogisticRegression	GainRatio	50	bayes	0.5403	0.4597	0.4462	0.5403	0.5504	0.5504	0.4496	0.0902	0.4404	0.4628	0.5372	0.3617	0.4628	0.445	0.445	0.5551	-0.0905	0.3472
PART	SymmerU	30	rules	0.8938	0.1062	0.9086	0.8938	0.8993	0.8993	0.1007	0.7931	0.8965	0.8671	0.1329	0.8794	0.8671	0.8633	0.8633	0.1367	0.7303	0.8651
OneR	SymmerU	30	rules	0.8898	0.1102	0.914	0.8898	0.9145	0.9145	0.0855	0.8039	0.9004	0.867	0.133	0.8865	0.867	0.8754	0.8754	0.1247	0.7423	0.8709
IBk	ReliefF	50	lazy	0.8763	0.1237	0.8925	0.8763	0.8805	0.8805	0.1195	0.7569	0.8784	0.8139	0.1862	0.844	0.8139	0.829	0.829	0.171	0.6427	0.8205
ZeroR	SymmerU	30	rules	0.5	0.5	0.6667	0.5	-0.1667	-0.1667	0.6667	-1	0.4	0.5	0.5	0.6667	0.5	0.3334	0.3334	0.6667	-1	0.4
END	ReliefF	10	meta	0.8522	0.1478	0.8602	0.8522	0.8403	0.8403	0.1597	0.6924	0.8455	0.8936	0.1064	0.8936	0.8936	0.8758	0.8758	0.1243	0.7692	0.8833
Dagging	SymmerU	50	meta	0.9046	0.0954	0.9086	0.9046	0.8936	0.8936	0.1064	0.7981	0.8986	0.867	0.133	0.8865	0.867	0.8754	0.8754	0.1247	0.7423	0.8709
ConjunctiveRule	SymmerU	30	rules	0.8844	0.1156	0.9014	0.8844	0.8921	0.8921	0.1079	0.7764	0.888	0.867	0.133	0.8865	0.867	0.8754	0.8754	0.1247	0.7423	0.8709
ComplementNaiveBayes	InfoGain	50	bayes	0.836	0.164	0.8065	0.836	0.7993	0.7993	0.2007	0.6343	0.7992	0.8032	0.1968	0.7872	0.8032	0.7726	0.7726	0.2274	0.575	0.7765
DMNBtext	InfoGain	50	bayes	0.8669	0.1331	0.8925	0.8669	0.8875	0.8875	0.1125	0.7542	0.8759	0.8617	0.1383	0.8794	0.8617	0.8657	0.8657	0.1343	0.7274	0.8637
NaiveBayesMultinomial	InfoGain	50	bayes	0.836	0.164	0.8065	0.836	0.7993	0.7993	0.2007	0.6343	0.7992	0.8032	0.1968	0.7872	0.8032	0.7726	0.7726	0.2274	0.575	0.7765
NaiveBayesMultinomialUpdateable	InfoGain	50	bayes	0.8642	0.1358	0.8513	0.8642	0.8328	0.8328	0.1672	0.6964	0.8414	0.8405	0.1596	0.844	0.8405	0.8225	0.8225	0.1775	0.6627	0.8296
NaiveBayes	InfoGain	50	bayes	0.9019	0.0981	0.8978	0.9019	0.8798	0.8798	0.1202	0.7814	0.8886	0.883	0.117	0.8723	0.883	0.8534	0.8534	0.1466	0.7358	0.8629
Logistic	InfoGain	50	functions	0.8629	0.1371	0.8656	0.8629	0.8456	0.8456	0.1544	0.7083	0.8527	0.8724	0.1276	0.8652	0.8724	0.8456	0.8456	0.1544	0.7174	0.8547
BayesianLogisticRegression	InfoGain	50	bayes	0.1237	0.8763	0.1129	0.1237	0.1285	0.1285	0.8715	-0.7478	0.1128	0.1276	0.8724	0.1135	0.1276	0.1276	0.1276	0.8724	-0.7447	0.1135
BayesNet	InfoGain	50	bayes	0.9073	0.0927	0.9158	0.9073	0.9041	0.9041	0.0959	0.8113	0.9056	0.883	0.117	0.8936	0.883	0.879	0.879	0.121	0.762	0.8809
IB1	ReliefF	50	lazy	0.8763	0.1237	0.8925	0.8763	0.8805	0.8805	0.1195	0.7569	0.8784	0.8139	0.1862	0.844	0.8139	0.829	0.829	0.171	0.6427	0.8205
MultiClassClassifier	ReliefF	10	meta	0.8696	0.1304	0.8763	0.8696	0.858	0.858	0.142	0.7275	0.8632	0.8777	0.1223	0.8865	0.8777	0.8701	0.8701	0.1299	0.7477	0.8737
LibSVM	InfoGain	50	functions	0.5081	0.4919	0.672	0.5081	0.8351	0.8351	0.1649	0.104	0.4172	0.5	0.5	0.6667	0.5	0.3334	0.3334	0.6667	-1	0.4
LWL	OneR	50	lazy	0.8992	0.1008	0.9086	0.8992	0.8961	0.8961	0.1039	0.7952	0.8976	0.867	0.133	0.8865	0.867	0.8754	0.8754	0.1247	0.7423	0.8709
AdaBoostM1	OneR	50	meta	0.8965	0.1035	0.9068	0.8965	0.8944	0.8944	0.1056	0.7909	0.8954	0.867	0.133	0.8865	0.867	0.8754	0.8754	0.1247	0.7423	0.8709
MultilayerPerceptron	OneR	50	functions	0.9005	0.0995	0.9068	0.9005	0.8925	0.8925	0.1075	0.793	0.8963	0.867	0.133	0.8511	0.867	0.8337	0.8337	0.1664	0.6999	0.8419
RBFNetwork	OneR	50	functions	0.8817	0.1183	0.8978	0.8817	0.8871	0.8871	0.1129	0.7688	0.8843	0.8724	0.1276	0.8936	0.8724	0.8854	0.8854	0.1146	0.7577	0.8784
SimpleLogistic	OneR	50	functions	0.9113	0.0887	0.9176	0.9113	0.905	0.905	0.095	0.8162	0.908	0.8777	0.1223	0.8865	0.8777	0.8701	0.8701	0.1299	0.7477	0.8737
SPegasos	OneR	50	functions	0.5094	0.4906	0.672	0.5094	0.7354	0.7354	0.2646	0.0941	0.422	0.5107	0.4894	0.6738	0.5107	0.8357	0.8357	0.1643	0.1195	0.4226
VotedPerceptron	OneR	50	functions	0.8105	0.1895	0.8566	0.8105	0.8604	0.8604	0.1396	0.669	0.8279	0.7819	0.2181	0.844	0.7819	0.8653	0.8653	0.1347	0.6418	0.8051
IB1	OneR	50	lazy	0.8763	0.1237	0.8871	0.8763	0.8715	0.8715	0.1285	0.7478	0.8738	0.8564	0.1436	0.8652	0.8564	0.8461	0.8461	0.154	0.7024	0.8507
IBk	OneR	50	lazy	0.8763	0.1237	0.8871	0.8763	0.8715	0.8715	0.1285	0.7478	0.8738	0.8564	0.1436	0.8652	0.8564	0.8461	0.8461	0.154	0.7024	0.8507
KStar	OneR	50	lazy	0.7634	0.2366	0.733	0.7634	0.7342	0.7342	0.2658	0.4968	0.7257	0.8245	0.1755	0.7872	0.8245	0.7884	0.7884	0.2116	0.6118	0.7815
LADTree	ReliefF	10	trees	0.8481	0.1519	0.8566	0.8481	0.8364	0.8364	0.1636	0.6844	0.8416	0.8829	0.1171	0.8865	0.8829	0.8686	0.8686	0.1314	0.7515	0.8749
VotedPerceptron	ReliefF	50	functions	0.8481	0.1519	0.8746	0.8481	0.8652	0.8652	0.1348	0.7131	0.8556	0.8617	0.1383	0.8723	0.8617	0.8545	0.8545	0.1456	0.7161	0.8579
VFI	SymmerU	50	misc	0.8602	0.1398	0.8584	0.8602	0.838	0.838	0.162	0.6978	0.8463	0.8723	0.1277	0.8723	0.8723	0.8527	0.8527	0.1473	0.7248	0.8606
NaiveBayesMultinomialUpdateable	OneR	30	bayes	0.75	0.25	0.8136	0.75	0.8178	0.8178	0.1822	0.5637	0.7687	0.7234	0.2766	0.7872	0.7234	0.777	0.777	0.2231	0.4975	0.7383
LADTree	GainRatio	50	trees	0.879	0.121	0.8961	0.879	0.8854	0.8854	0.1146	0.7645	0.8821	0.8724	0.1276	0.8865	0.8724	0.8724	0.8724	0.1276	0.7447	0.8724
ADTree	SymmerU	30	trees	0.8978	0.1022	0.9086	0.8978	0.8968	0.8968	0.1032	0.7946	0.8973	0.8724	0.1276	0.8865	0.8724	0.8724	0.8724	0.1276	0.7447	0.8724
BFTree	ReliefF	50	trees	0.8616	0.1384	0.8835	0.8616	0.8732	0.8732	0.1268	0.7347	0.8669	0.8298	0.1703	0.844	0.8298	0.8232	0.8232	0.1768	0.653	0.8263
AdaBoostM1	ReliefF	30	meta	0.8575	0.1425	0.8746	0.8575	0.8595	0.8595	0.1405	0.717	0.8585	0.8564	0.1437	0.8794	0.8564	0.8689	0.8689	0.1311	0.7252	0.8621
ADTree	ReliefF	30	trees	0.8642	0.1358	0.8799	0.8642	0.8652	0.8652	0.1348	0.7295	0.8647	0.8724	0.1276	0.8865	0.8724	0.8724	0.8724	0.1276	0.7447	0.8724
BFTree	ReliefF	30	trees	0.8669	0.1331	0.8889	0.8669	0.88	0.88	0.12	0.7468	0.8729	0.8405	0.1596	0.8652	0.8405	0.8524	0.8524	0.1476	0.6927	0.8459
PART	ReliefF	50	rules	0.8522	0.1478	0.8674	0.8522	0.8503	0.8503	0.1497	0.7024	0.8512	0.8245	0.1755	0.8511	0.8245	0.8359	0.8359	0.1641	0.6602	0.8297
ZeroR	ReliefF	30	rules	0.5	0.5	0.6667	0.5	-0.1667	-0.1667	0.6667	-1	0.4	0.5	0.5	0.6667	0.5	0.3334	0.3334	0.6667	-1	0.4
OneR	ReliefF	30	rules	0.8427	0.1573	0.8692	0.8427	0.8584	0.8584	0.1416	0.7009	0.8497	0.8138	0.1862	0.8511	0.8138	0.8432	0.8432	0.1568	0.6564	0.8255
Ridor	ReliefF	50	rules	0.8763	0.1237	0.8943	0.8763	0.8838	0.8838	0.1162	0.7601	0.8799	0.8617	0.1383	0.8723	0.8617	0.8545	0.8545	0.1456	0.7161	0.8579
DTNB	ReliefF	30	rules	0.8817	0.1183	0.8925	0.8817	0.8777	0.8777	0.1223	0.7595	0.8797	0.8724	0.1276	0.8936	0.8724	0.8854	0.8854	0.1146	0.7577	0.8784
ConjunctiveRule	ReliefF	50	rules	0.8616	0.1384	0.8566	0.8616	0.8364	0.8364	0.1636	0.6975	0.8451	0.8671	0.1329	0.8794	0.8671	0.8633	0.8633	0.1367	0.7303	0.8651
ConjunctiveRule	ReliefF	30	rules	0.8535	0.1465	0.8459	0.8535	0.826	0.826	0.174	0.6789	0.8346	0.8671	0.1329	0.8794	0.8671	0.8633	0.8633	0.1367	0.7303	0.8651
DTNB	ReliefF	50	rules	0.8844	0.1156	0.8961	0.8844	0.8824	0.8824	0.1176	0.7668	0.8834	0.8671	0.1329	0.8794	0.8671	0.8633	0.8633	0.1367	0.7303	0.8651
OneR	SymmerU	10	rules	0.8898	0.1102	0.914	0.8898	0.9145	0.9145	0.0855	0.8039	0.9004	0.867	0.133	0.8865	0.867	0.8754	0.8754	0.1247	0.7423	0.8709
PART	SymmerU	10	rules	0.9019	0.0981	0.9194	0.9019	0.9149	0.9149	0.0851	0.8167	0.9079	0.8724	0.1276	0.8865	0.8724	0.8724	0.8724	0.1276	0.7447	0.8724
Ridor	SymmerU	10	rules	0.879	0.121	0.905	0.879	0.9044	0.9044	0.0956	0.7831	0.8899	0.8564	0.1436	0.8723	0.8564	0.8564	0.8564	0.1436	0.7128	0.8564
ZeroR	SymmerU	10	rules	0.5	0.5	0.6667	0.5	-0.1667	-0.1667	0.6667	-1	0.4	0.5	0.5	0.6667	0.5	0.3334	0.3334	0.6667	-1	0.4
ConjunctiveRule	SymmerU	10	rules	0.8844	0.1156	0.9014	0.8844	0.8921	0.8921	0.1079	0.7764	0.888	0.867	0.133	0.8865	0.867	0.8754	0.8754	0.1247	0.7423	0.8709
DecisionTable	SymmerU	10	rules	0.8978	0.1022	0.9104	0.8978	0.9	0.9	0.1	0.7979	0.8989	0.8777	0.1223	0.8936	0.8777	0.8818	0.8818	0.1182	0.7595	0.8797
DTNB	SymmerU	10	rules	0.9005	0.0995	0.9122	0.9005	0.9016	0.9016	0.0984	0.8022	0.9011	0.8777	0.1223	0.8936	0.8777	0.8818	0.8818	0.1182	0.7595	0.8797
NNge	SymmerU	10	rules	0.8911	0.1089	0.9176	0.8911	0.9219	0.9219	0.0781	0.8124	0.904	0.883	0.117	0.9007	0.883	0.8917	0.8917	0.1083	0.7746	0.8871
NaiveBayesMultinomial	OneR	30	bayes	0.8696	0.1304	0.8566	0.8696	0.8382	0.8382	0.1618	0.7071	0.847	0.8351	0.1649	0.8227	0.8351	0.8046	0.8046	0.1954	0.639	0.8118
ADTree	SymmerU	10	trees	0.8978	0.1022	0.905	0.8978	0.8908	0.8908	0.1092	0.7886	0.8941	0.8724	0.1276	0.8865	0.8724	0.8724	0.8724	0.1276	0.7447	0.8724
BFTree	SymmerU	10	trees	0.8858	0.1142	0.9032	0.8858	0.8946	0.8946	0.1054	0.7803	0.8899	0.8724	0.1276	0.8936	0.8724	0.8854	0.8854	0.1146	0.7577	0.8784
LibSVM	InfoGain	100*	functions	0.5	0.5	0.6667	0.5	-0.1667	-0.1667	0.6667	-1	0.4	0.5	0.5	0.6667	0.5	0.3334	0.3334	0.6667	-1	0.4
NaiveBayesMultinomialUpdateable	InfoGain	100*	bayes	0.8925	0.1075	0.8996	0.8925	0.8846	0.8846	0.1154	0.777	0.8883	0.8458	0.1543	0.8652	0.8458	0.8495	0.8495	0.1505	0.6953	0.8476
NaiveBayesMultinomial	InfoGain	100*	bayes	0.8978	0.1022	0.8996	0.8978	0.8828	0.8828	0.1172	0.7805	0.8894	0.8458	0.1543	0.8652	0.8458	0.8495	0.8495	0.1505	0.6953	0.8476
DMNBtext	InfoGain	100*	bayes	0.8737	0.1263	0.8978	0.8737	0.8933	0.8933	0.1067	0.7667	0.8823	0.8724	0.1276	0.8865	0.8724	0.8724	0.8724	0.1276	0.7447	0.8724
ComplementNaiveBayes	InfoGain	100*	bayes	0.8978	0.1022	0.8996	0.8978	0.8828	0.8828	0.1172	0.7805	0.8894	0.8458	0.1543	0.8652	0.8458	0.8495	0.8495	0.1505	0.6953	0.8476
BayesNet	InfoGain	100*	bayes	0.9032	0.0968	0.914	0.9032	0.9032	0.9032	0.0968	0.8065	0.9032	0.883	0.117	0.8936	0.883	0.879	0.879	0.121	0.762	0.8809
BayesianLogisticRegression	InfoGain	100*	bayes	0.5269	0.4731	0.3907	0.5269	0.5662	0.5662	0.4338	0.0843	0.3557	0.5	0.5	0.3688	0.5	0.5	0.5	0.5	0	0.3345
Logistic	InfoGain	100*	functions	0.7742	0.2258	0.7849	0.7742	0.7596	0.7596	0.2404	0.5336	0.7652	0.8511	0.149	0.8582	0.8511	0.8379	0.8379	0.1621	0.6888	0.8436
NaiveBayes	InfoGain	100*	bayes	0.8952	0.1048	0.8978	0.8952	0.881	0.881	0.119	0.7761	0.8873	0.8829	0.1171	0.8794	0.8829	0.8602	0.8602	0.1399	0.7428	0.8689
LibSVM	OneR	10	functions	0.7836	0.2164	0.8477	0.7836	0.8756	0.8756	0.1244	0.6528	0.8083	0.7553	0.2447	0.8227	0.7553	0.8388	0.8388	0.1613	0.5882	0.7767
MultiClassClassifier	InfoGain	10	meta	0.9073	0.0927	0.9104	0.9073	0.8953	0.8953	0.1047	0.8025	0.9007	0.883	0.117	0.8936	0.883	0.879	0.879	0.121	0.762	0.8809
MultiBoostAB	InfoGain	10	meta	0.9005	0.0995	0.9122	0.9005	0.9016	0.9016	0.0984	0.8022	0.9011	0.8617	0.1383	0.8794	0.8617	0.8657	0.8657	0.1343	0.7274	0.8637
Dagging	InfoGain	10	meta	0.9059	0.0941	0.8978	0.9059	0.8796	0.8796	0.1204	0.785	0.8893	0.8829	0.1171	0.8865	0.8829	0.8686	0.8686	0.1314	0.7515	0.8749
Bagging	InfoGain	10	meta	0.9032	0.0968	0.9158	0.9032	0.9066	0.9066	0.0934	0.8098	0.9049	0.8724	0.1276	0.8865	0.8724	0.8724	0.8724	0.1276	0.7447	0.8724
END	InfoGain	10	meta	0.9046	0.0954	0.9194	0.9046	0.9126	0.9126	0.0874	0.8172	0.9084	0.8724	0.1276	0.8936	0.8724	0.8854	0.8854	0.1146	0.7577	0.8784
Decorate	InfoGain	10	meta	0.8978	0.1022	0.9068	0.8978	0.8937	0.8937	0.1063	0.7915	0.8957	0.8724	0.1276	0.8865	0.8724	0.8724	0.8724	0.1276	0.7447	0.8724
NaiveBayes	OneR	10	bayes	0.8817	0.1183	0.8692	0.8817	0.8506	0.8506	0.1494	0.7316	0.86	0.8511	0.149	0.8582	0.8511	0.8379	0.8379	0.1621	0.6888	0.8436
Logistic	OneR	10	functions	0.9005	0.0995	0.9068	0.9005	0.8925	0.8925	0.1075	0.793	0.8963	0.8883	0.1117	0.9007	0.8883	0.8883	0.8883	0.1117	0.7766	0.8883
BayesianLogisticRegression	OneR	10	bayes	0.0995	0.9005	0.1057	0.0995	0.1242	0.1242	0.8758	-0.776	0.1033	0.1011	0.899	0.1064	0.1011	0.1249	0.1249	0.8752	-0.7737	0.1042
BayesNet	OneR	10	bayes	0.9126	0.0874	0.9229	0.9126	0.9138	0.9138	0.0862	0.8264	0.9132	0.8724	0.1276	0.8865	0.8724	0.8724	0.8724	0.1276	0.7447	0.8724
ComplementNaiveBayes	OneR	10	bayes	0.793	0.207	0.7527	0.793	0.761	0.761	0.239	0.5531	0.7475	0.7766	0.2234	0.7376	0.7766	0.7465	0.7465	0.2535	0.5222	0.7322
HyperPipes	InfoGain	10	misc	0.7527	0.2473	0.6828	0.7527	0.7397	0.7397	0.2603	0.4922	0.6823	0.75	0.25	0.6809	0.75	0.7369	0.7369	0.2632	0.4866	0.6803
NNge	GainRatio	30	rules	0.9005	0.0995	0.9194	0.9005	0.9161	0.9161	0.0839	0.8165	0.9076	0.8671	0.1329	0.8794	0.8671	0.8633	0.8633	0.1367	0.7303	0.8651
NaiveBayesMultinomialUpdateable	OneR	10	bayes	0.5605	0.4395	0.6434	0.5605	0.5756	0.5756	0.4244	0.1353	0.5599	0.5479	0.4521	0.6312	0.5479	0.5593	0.5593	0.4407	0.1066	0.5463
Decorate	OneR	30	meta	0.9073	0.0927	0.9194	0.9073	0.9106	0.9106	0.0894	0.8179	0.9089	0.8511	0.149	0.8723	0.8511	0.859	0.859	0.141	0.71	0.8548
END	OneR	30	meta	0.8898	0.1102	0.9032	0.8898	0.8919	0.8919	0.1081	0.7817	0.8908	0.8298	0.1702	0.8652	0.8298	0.8607	0.8607	0.1394	0.6897	0.8421
Bagging	OneR	30	meta	0.9073	0.0927	0.9211	0.9073	0.9142	0.9142	0.0858	0.8214	0.9106	0.8936	0.1064	0.9007	0.8936	0.8858	0.8858	0.1143	0.7793	0.8895
FilteredClassifier	GainRatio	30	meta	0.9113	0.0887	0.9247	0.9113	0.9183	0.9183	0.0817	0.8295	0.9146	0.8458	0.1543	0.8582	0.8458	0.8389	0.8389	0.1612	0.6846	0.8421
MultiBoostAB	OneR	30	meta	0.9019	0.0981	0.914	0.9019	0.9041	0.9041	0.0959	0.806	0.903	0.8671	0.1329	0.8794	0.8671	0.8633	0.8633	0.1367	0.7303	0.8651
Decorate	GainRatio	30	meta	0.9194	0.0806	0.9319	0.9194	0.9265	0.9265	0.0735	0.8458	0.9228	0.8671	0.1329	0.8794	0.8671	0.8633	0.8633	0.1367	0.7303	0.8651
Dagging	GainRatio	30	meta	0.8468	0.1532	0.8871	0.8468	0.8971	0.8971	0.1029	0.7422	0.8652	0.8724	0.1276	0.8936	0.8724	0.8854	0.8854	0.1146	0.7577	0.8784
Bagging	GainRatio	30	meta	0.9073	0.0927	0.9211	0.9073	0.9142	0.9142	0.0858	0.8214	0.9106	0.883	0.117	0.8936	0.883	0.879	0.879	0.121	0.762	0.8809
LADTree	OneR	100*	trees	0.8871	0.1129	0.9032	0.8871	0.8937	0.8937	0.1063	0.7807	0.8902	0.867	0.133	0.8865	0.867	0.8754	0.8754	0.1247	0.7423	0.8709
HyperPipes	OneR	30	misc	0.8454	0.1546	0.8208	0.8454	0.8091	0.8091	0.1909	0.6536	0.8127	0.8085	0.1915	0.7801	0.8085	0.7746	0.7746	0.2255	0.5821	0.7724
VFI	OneR	30	misc	0.8401	0.1599	0.8172	0.8401	0.8047	0.8047	0.1953	0.6438	0.8086	0.8085	0.1915	0.7801	0.8085	0.7746	0.7746	0.2255	0.5821	0.7724
VFI	GainRatio	30	misc	0.8159	0.1841	0.8656	0.8159	0.8789	0.8789	0.1211	0.6919	0.8366	0.8298	0.1702	0.8652	0.8298	0.8607	0.8607	0.1394	0.6897	0.8421
HyperPipes	GainRatio	30	misc	0.7554	0.2446	0.6971	0.7554	0.7345	0.7345	0.2655	0.4895	0.6953	0.7713	0.2287	0.7163	0.7713	0.7466	0.7466	0.2534	0.5173	0.7139
DecisionStump	GainRatio	50	trees	0.8992	0.1008	0.9086	0.8992	0.8961	0.8961	0.1039	0.7952	0.8976	0.867	0.133	0.8865	0.867	0.8754	0.8754	0.1247	0.7423	0.8709
LogitBoost	InfoGain	10	meta	0.8952	0.1048	0.9086	0.8952	0.8984	0.8984	0.1016	0.7936	0.8968	0.867	0.133	0.8865	0.867	0.8754	0.8754	0.1247	0.7423	0.8709
FilteredClassifier	InfoGain	10	meta	0.8938	0.1062	0.9104	0.8938	0.9029	0.9029	0.0971	0.7966	0.8981	0.867	0.133	0.8865	0.867	0.8754	0.8754	0.1247	0.7423	0.8709
BayesNet	OneR	30	bayes	0.9126	0.0874	0.9211	0.9126	0.9105	0.9105	0.0895	0.8231	0.9115	0.8777	0.1223	0.8865	0.8777	0.8701	0.8701	0.1299	0.7477	0.8737
BayesianLogisticRegression	OneR	30	bayes	0.0941	0.9059	0.0878	0.0941	0.1013	0.1013	0.8987	-0.8046	0.0877	0.1224	0.8777	0.1277	0.1224	0.1473	0.1473	0.8527	-0.73	0.1249
Logistic	OneR	30	functions	0.8831	0.1169	0.8889	0.8831	0.8718	0.8718	0.1282	0.7548	0.8769	0.8883	0.1117	0.8936	0.8883	0.8771	0.8771	0.123	0.7652	0.8822
NaiveBayes	OneR	30	bayes	0.8871	0.1129	0.8817	0.8871	0.8626	0.8626	0.1374	0.7493	0.8717	0.8777	0.1224	0.8723	0.8777	0.8527	0.8527	0.1473	0.73	0.8618
RandomTree	GainRatio	10	trees	0.8427	0.1573	0.8602	0.8427	0.8427	0.8427	0.1573	0.6855	0.8427	0.8564	0.1436	0.8723	0.8564	0.8564	0.8564	0.1436	0.7128	0.8564
REPTree	GainRatio	10	trees	0.9032	0.0968	0.9194	0.9032	0.9137	0.9137	0.0863	0.8169	0.9081	0.867	0.133	0.8865	0.867	0.8754	0.8754	0.1247	0.7423	0.8709
DMNBtext	OneR	30	bayes	0.8669	0.1331	0.8943	0.8669	0.8915	0.8915	0.1085	0.7581	0.8774	0.8192	0.1809	0.8511	0.8192	0.8391	0.8391	0.1609	0.658	0.8276
ComplementNaiveBayes	OneR	30	bayes	0.8696	0.1304	0.8548	0.8696	0.8369	0.8369	0.1631	0.7058	0.8455	0.8351	0.1649	0.8227	0.8351	0.8046	0.8046	0.1954	0.639	0.8118
LADTree	GainRatio	10	trees	0.8763	0.1237	0.8907	0.8763	0.8774	0.8774	0.1226	0.7537	0.8769	0.8777	0.1223	0.8936	0.8777	0.8818	0.8818	0.1182	0.7595	0.8797
LMT	GainRatio	10	trees	0.9005	0.0995	0.9122	0.9005	0.9016	0.9016	0.0984	0.8022	0.9011	0.8724	0.1276	0.8794	0.8724	0.8616	0.8616	0.1385	0.7338	0.8664
LibSVM	OneR	30	functions	0.5296	0.4704	0.6864	0.5296	0.84	0.84	0.16	0.2005	0.4606	0.5319	0.4681	0.6879	0.5319	0.8406	0.8406	0.1594	0.2085	0.4652
RandomForest	GainRatio	10	trees	0.9032	0.0968	0.9176	0.9032	0.9101	0.9101	0.0899	0.8133	0.9065	0.8671	0.1329	0.8794	0.8671	0.8633	0.8633	0.1367	0.7303	0.8651
DecisionStump	GainRatio	10	trees	0.8992	0.1008	0.9086	0.8992	0.8961	0.8961	0.1039	0.7952	0.8976	0.867	0.133	0.8865	0.867	0.8754	0.8754	0.1247	0.7423	0.8709
FT	GainRatio	10	trees	0.8898	0.1102	0.9068	0.8898	0.8987	0.8987	0.1013	0.7885	0.894	0.8724	0.1276	0.8865	0.8724	0.8724	0.8724	0.1276	0.7447	0.8724
J48	GainRatio	10	trees	0.9099	0.0901	0.9211	0.9099	0.9122	0.9122	0.0878	0.8221	0.911	0.867	0.133	0.8865	0.867	0.8754	0.8754	0.1247	0.7423	0.8709
J48graft	GainRatio	10	trees	0.9113	0.0887	0.9229	0.9113	0.9147	0.9147	0.0853	0.826	0.913	0.867	0.133	0.8865	0.867	0.8754	0.8754	0.1247	0.7423	0.8709
OneR	InfoGain	50	rules	0.8898	0.1102	0.914	0.8898	0.9145	0.9145	0.0855	0.8039	0.9004	0.867	0.133	0.8865	0.867	0.8754	0.8754	0.1247	0.7423	0.8709
PART	InfoGain	50	rules	0.8925	0.1075	0.9014	0.8925	0.8874	0.8874	0.1126	0.7799	0.8898	0.8617	0.1383	0.8794	0.8617	0.8657	0.8657	0.1343	0.7274	0.8637
Ridor	InfoGain	50	rules	0.8884	0.1116	0.9086	0.8884	0.9035	0.9035	0.0965	0.7918	0.8953	0.8352	0.1649	0.8582	0.8352	0.8427	0.8427	0.1573	0.6778	0.8387
J48	SymmerU	10	trees	0.9086	0.0914	0.9247	0.9086	0.9205	0.9205	0.0795	0.829	0.9141	0.8777	0.1223	0.8936	0.8777	0.8818	0.8818	0.1182	0.7595	0.8797
LMT	SymmerU	10	trees	0.8992	0.1008	0.905	0.8992	0.8902	0.8902	0.1098	0.7894	0.8944	0.883	0.117	0.8936	0.883	0.879	0.879	0.121	0.762	0.8809
DecisionTable	InfoGain	50	rules	0.9005	0.0995	0.9122	0.9005	0.9016	0.9016	0.0984	0.8022	0.9011	0.867	0.133	0.8865	0.867	0.8754	0.8754	0.1247	0.7423	0.8709
RandomForest	SymmerU	10	trees	0.8898	0.1102	0.8978	0.8898	0.8829	0.8829	0.1171	0.7726	0.8861	0.8724	0.1276	0.8794	0.8724	0.8616	0.8616	0.1385	0.7338	0.8664
NBTree	SymmerU	10	trees	0.9046	0.0954	0.9229	0.9046	0.9203	0.9203	0.0797	0.8247	0.9117	0.8883	0.1117	0.9007	0.8883	0.8883	0.8883	0.1117	0.7766	0.8883
REPTree	SymmerU	10	trees	0.9059	0.0941	0.9229	0.9059	0.919	0.919	0.081	0.8248	0.912	0.867	0.133	0.8865	0.867	0.8754	0.8754	0.1247	0.7423	0.8709
RandomTree	SymmerU	10	trees	0.832	0.168	0.8441	0.832	0.823	0.823	0.177	0.6549	0.8271	0.8724	0.1276	0.8865	0.8724	0.8724	0.8724	0.1276	0.7447	0.8724
PART	ReliefF	10	rules	0.8454	0.1546	0.8584	0.8454	0.8393	0.8393	0.1607	0.6847	0.8422	0.8724	0.1276	0.8794	0.8724	0.8616	0.8616	0.1385	0.7338	0.8664
OneR	ReliefF	10	rules	0.8522	0.1478	0.8746	0.8522	0.8624	0.8624	0.1376	0.7145	0.8569	0.8511	0.149	0.8652	0.8511	0.8475	0.8475	0.1526	0.6985	0.8492
ADTree	InfoGain	50	trees	0.8911	0.1089	0.905	0.8911	0.8944	0.8944	0.1056	0.7855	0.8927	0.883	0.117	0.8936	0.883	0.879	0.879	0.121	0.762	0.8809
DTNB	ReliefF	10	rules	0.8817	0.1183	0.8871	0.8817	0.8697	0.8697	0.1303	0.7513	0.8751	0.8404	0.1596	0.8582	0.8404	0.8404	0.8404	0.1596	0.6809	0.8404
DecisionTable	ReliefF	10	rules	0.871	0.129	0.8763	0.871	0.8577	0.8577	0.1423	0.7286	0.8635	0.8724	0.1276	0.8865	0.8724	0.8724	0.8724	0.1276	0.7447	0.8724
ConjunctiveRule	ReliefF	10	rules	0.8454	0.1546	0.8477	0.8454	0.8264	0.8264	0.1736	0.6716	0.8338	0.9043	0.0958	0.8936	0.9043	0.8752	0.8752	0.1248	0.7789	0.8853
BFTree	GainRatio	10	trees	0.875	0.125	0.8925	0.875	0.8813	0.8813	0.1187	0.7563	0.878	0.8724	0.1276	0.8794	0.8724	0.8616	0.8616	0.1385	0.7338	0.8664
ADTree	GainRatio	10	trees	0.8844	0.1156	0.8996	0.8844	0.8887	0.8887	0.1113	0.7731	0.8865	0.8724	0.1276	0.8865	0.8724	0.8724	0.8724	0.1276	0.7447	0.8724
DecisionTable	GainRatio	10	rules	0.8925	0.1075	0.9104	0.8925	0.9039	0.9039	0.0961	0.7963	0.8978	0.8777	0.1223	0.8936	0.8777	0.8818	0.8818	0.1182	0.7595	0.8797
VFI	InfoGain	10	misc	0.7513	0.2487	0.6828	0.7513	0.7375	0.7375	0.2625	0.4887	0.6822	0.75	0.25	0.6809	0.75	0.7369	0.7369	0.2632	0.4866	0.6803
NNge	GainRatio	10	rules	0.9019	0.0981	0.9229	0.9019	0.923	0.923	0.077	0.8246	0.9112	0.8724	0.1276	0.8865	0.8724	0.8724	0.8724	0.1276	0.7447	0.8724
DTNB	GainRatio	10	rules	0.9046	0.0954	0.9194	0.9046	0.9126	0.9126	0.0874	0.8172	0.9084	0.8564	0.1436	0.8723	0.8564	0.8564	0.8564	0.1436	0.7128	0.8564
PART	GainRatio	10	rules	0.8871	0.1129	0.9032	0.8871	0.8937	0.8937	0.1063	0.7807	0.8902	0.8671	0.1329	0.8794	0.8671	0.8633	0.8633	0.1367	0.7303	0.8651
OneR	GainRatio	10	rules	0.8898	0.1102	0.914	0.8898	0.9145	0.9145	0.0855	0.8039	0.9004	0.867	0.133	0.8865	0.867	0.8754	0.8754	0.1247	0.7423	0.8709
ZeroR	GainRatio	10	rules	0.5	0.5	0.6667	0.5	-0.1667	-0.1667	0.6667	-1	0.4	0.5	0.5	0.6667	0.5	0.3334	0.3334	0.6667	-1	0.4
Ridor	GainRatio	10	rules	0.879	0.121	0.9032	0.879	0.9003	0.9003	0.0997	0.779	0.8883	0.8511	0.149	0.8723	0.8511	0.859	0.859	0.141	0.71	0.8548
HyperPipes	InfoGain	30	misc	0.8589	0.1411	0.8369	0.8589	0.8227	0.8227	0.1773	0.6806	0.8286	0.8298	0.1702	0.8085	0.8298	0.7957	0.7957	0.2044	0.6245	0.7995
VFI	InfoGain	30	misc	0.8575	0.1425	0.8351	0.8575	0.8213	0.8213	0.1787	0.6778	0.8268	0.8298	0.1702	0.8085	0.8298	0.7957	0.7957	0.2044	0.6245	0.7995
RandomForest	OneR	30	trees	0.9073	0.0927	0.9158	0.9073	0.9041	0.9041	0.0959	0.8113	0.9056	0.8936	0.1064	0.9007	0.8936	0.8858	0.8858	0.1143	0.7793	0.8895
NaiveBayesMultinomial	OneR	10	bayes	0.7715	0.2285	0.7437	0.7715	0.7414	0.7414	0.2586	0.512	0.7357	0.7766	0.2234	0.7447	0.7766	0.7459	0.7459	0.2541	0.5216	0.7377
Bagging	InfoGain	30	meta	0.9086	0.0914	0.9229	0.9086	0.9167	0.9167	0.0833	0.8253	0.9125	0.8617	0.1383	0.8794	0.8617	0.8657	0.8657	0.1343	0.7274	0.8637
Dagging	InfoGain	30	meta	0.9153	0.0847	0.9122	0.9153	0.8955	0.8955	0.1045	0.8106	0.9038	0.9043	0.0958	0.9078	0.9043	0.8926	0.8926	0.1075	0.7967	0.8979
Decorate	InfoGain	30	meta	0.8938	0.1062	0.9014	0.8938	0.8868	0.8868	0.1132	0.7806	0.8901	0.8352	0.1649	0.8582	0.8352	0.8427	0.8427	0.1573	0.6778	0.8387
END	InfoGain	30	meta	0.8723	0.1277	0.8799	0.8723	0.8622	0.8622	0.1378	0.7345	0.8668	0.8298	0.1702	0.8582	0.8298	0.8458	0.8458	0.1542	0.6754	0.8368
FilteredClassifier	InfoGain	30	meta	0.8777	0.1223	0.8978	0.8777	0.8899	0.8899	0.1101	0.7675	0.8833	0.867	0.133	0.8865	0.867	0.8754	0.8754	0.1247	0.7423	0.8709
LogitBoost	InfoGain	30	meta	0.9059	0.0941	0.9158	0.9059	0.9048	0.9048	0.0952	0.8107	0.9054	0.8724	0.1276	0.8865	0.8724	0.8724	0.8724	0.1276	0.7447	0.8724
MultiBoostAB	InfoGain	30	meta	0.8992	0.1008	0.9122	0.8992	0.9025	0.9025	0.0975	0.8017	0.9008	0.8829	0.1171	0.8865	0.8829	0.8686	0.8686	0.1314	0.7515	0.8749
MultiClassClassifier	InfoGain	30	meta	0.8858	0.1142	0.8853	0.8858	0.8666	0.8666	0.1334	0.7521	0.8745	0.8936	0.1064	0.8936	0.8936	0.8758	0.8758	0.1243	0.7692	0.8833
NNge	ReliefF	30	rules	0.8495	0.1505	0.8853	0.8495	0.8886	0.8886	0.1114	0.7371	0.8646	0.7873	0.2128	0.8298	0.7873	0.819	0.819	0.181	0.6054	0.7993
DecisionStump	InfoGain	50	trees	0.8992	0.1008	0.9086	0.8992	0.8961	0.8961	0.1039	0.7952	0.8976	0.867	0.133	0.8865	0.867	0.8754	0.8754	0.1247	0.7423	0.8709
J48graft	InfoGain	50	trees	0.9032	0.0968	0.9122	0.9032	0.9001	0.9001	0.0999	0.8033	0.9016	0.8777	0.1223	0.8936	0.8777	0.8818	0.8818	0.1182	0.7595	0.8797
J48	InfoGain	50	trees	0.8804	0.1196	0.8925	0.8804	0.8784	0.8784	0.1216	0.7587	0.8794	0.9043	0.0958	0.9149	0.9043	0.9043	0.9043	0.0958	0.8085	0.9043
LMT	InfoGain	50	trees	0.8938	0.1062	0.905	0.8938	0.8928	0.8928	0.1072	0.7866	0.8933	0.8883	0.1117	0.8936	0.8883	0.8771	0.8771	0.123	0.7652	0.8822
LADTree	InfoGain	50	trees	0.8817	0.1183	0.9032	0.8817	0.8978	0.8978	0.1022	0.7794	0.889	0.8564	0.1437	0.8794	0.8564	0.8689	0.8689	0.1311	0.7252	0.8621
RandomForest	InfoGain	50	trees	0.9059	0.0941	0.914	0.9059	0.9017	0.9017	0.0983	0.8076	0.9037	0.8724	0.1276	0.8865	0.8724	0.8724	0.8724	0.1276	0.7447	0.8724
NBTree	InfoGain	50	trees	0.8871	0.1129	0.8996	0.8871	0.8871	0.8871	0.1129	0.7742	0.8871	0.8724	0.1276	0.8794	0.8724	0.8616	0.8616	0.1385	0.7338	0.8664
REPTree	InfoGain	50	trees	0.9019	0.0981	0.9194	0.9019	0.9149	0.9149	0.0851	0.8167	0.9079	0.867	0.133	0.8865	0.867	0.8754	0.8754	0.1247	0.7423	0.8709
RandomTree	InfoGain	50	trees	0.832	0.168	0.8459	0.832	0.8253	0.8253	0.1747	0.6572	0.8284	0.8192	0.1809	0.8298	0.8192	0.8072	0.8072	0.1928	0.6262	0.8124
LogitBoost	GainRatio	30	meta	0.9032	0.0968	0.9176	0.9032	0.9101	0.9101	0.0899	0.8133	0.9065	0.867	0.133	0.8865	0.867	0.8754	0.8754	0.1247	0.7423	0.8709
LMT	OneR	10	trees	0.8992	0.1008	0.9086	0.8992	0.8961	0.8961	0.1039	0.7952	0.8976	0.8883	0.1117	0.9007	0.8883	0.8883	0.8883	0.1117	0.7766	0.8883
LADTree	OneR	10	trees	0.8992	0.1008	0.914	0.8992	0.906	0.906	0.094	0.8051	0.9024	0.8724	0.1276	0.8936	0.8724	0.8854	0.8854	0.1146	0.7577	0.8784
AdaBoostM1	InfoGain	100*	meta	0.8992	0.1008	0.9086	0.8992	0.8961	0.8961	0.1039	0.7952	0.8976	0.867	0.133	0.8865	0.867	0.8754	0.8754	0.1247	0.7423	0.8709
LWL	InfoGain	100*	lazy	0.8992	0.1008	0.9086	0.8992	0.8961	0.8961	0.1039	0.7952	0.8976	0.867	0.133	0.8865	0.867	0.8754	0.8754	0.1247	0.7423	0.8709
FT	OneR	10	trees	0.8965	0.1035	0.9158	0.8965	0.9119	0.9119	0.0881	0.8083	0.9035	0.8777	0.1223	0.8936	0.8777	0.8818	0.8818	0.1182	0.7595	0.8797
DecisionStump	OneR	10	trees	0.8992	0.1008	0.9086	0.8992	0.8961	0.8961	0.1039	0.7952	0.8976	0.867	0.133	0.8865	0.867	0.8754	0.8754	0.1247	0.7423	0.8709
J48graft	OneR	10	trees	0.914	0.086	0.9283	0.914	0.9235	0.9235	0.0765	0.8374	0.9185	0.867	0.133	0.8865	0.867	0.8754	0.8754	0.1247	0.7423	0.8709
J48	OneR	10	trees	0.9086	0.0914	0.9247	0.9086	0.9205	0.9205	0.0795	0.829	0.9141	0.867	0.133	0.8865	0.867	0.8754	0.8754	0.1247	0.7423	0.8709
SPegasos	InfoGain	100*	functions	0.5	0.5	0.6667	0.5	-0.1667	-0.1667	0.6667	-1	0.4	0.5	0.5	0.6667	0.5	0.3334	0.3334	0.6667	-1	0.4
END	GainRatio	30	meta	0.8938	0.1062	0.9068	0.8938	0.896	0.896	0.104	0.7898	0.8949	0.8564	0.1436	0.8723	0.8564	0.8564	0.8564	0.1436	0.7128	0.8564
RBFNetwork	InfoGain	100*	functions	0.8858	0.1142	0.9032	0.8858	0.8946	0.8946	0.1054	0.7803	0.8899	0.8564	0.1437	0.8794	0.8564	0.8689	0.8689	0.1311	0.7252	0.8621
MultilayerPerceptron	InfoGain	100*	functions	0.8992	0.1008	0.9104	0.8992	0.8992	0.8992	0.1008	0.7984	0.8992	0.8723	0.1277	0.8723	0.8723	0.8527	0.8527	0.1473	0.7248	0.8606
REPTree	OneR	10	trees	0.8978	0.1022	0.9122	0.8978	0.9034	0.9034	0.0966	0.8012	0.9005	0.867	0.133	0.8865	0.867	0.8754	0.8754	0.1247	0.7423	0.8709
RandomTree	OneR	10	trees	0.8212	0.1788	0.8423	0.8212	0.823	0.823	0.177	0.6442	0.8221	0.8511	0.149	0.8582	0.8511	0.8379	0.8379	0.1621	0.6888	0.8436
IB1	InfoGain	100*	lazy	0.8562	0.1438	0.8674	0.8562	0.849	0.849	0.151	0.7051	0.8524	0.8724	0.1276	0.8936	0.8724	0.8854	0.8854	0.1146	0.7577	0.8784
VotedPerceptron	InfoGain	100*	functions	0.879	0.121	0.9014	0.879	0.8963	0.8963	0.1037	0.7751	0.8867	0.8298	0.1702	0.8582	0.8298	0.8458	0.8458	0.1542	0.6754	0.8368
AdaBoostM1	OneR	100*	meta	0.9019	0.0981	0.9122	0.9019	0.9008	0.9008	0.0992	0.8027	0.9013	0.867	0.133	0.8865	0.867	0.8754	0.8754	0.1247	0.7423	0.8709
LWL	OneR	100*	lazy	0.8992	0.1008	0.9086	0.8992	0.8961	0.8961	0.1039	0.7952	0.8976	0.867	0.133	0.8865	0.867	0.8754	0.8754	0.1247	0.7423	0.8709
IB1	OneR	100*	lazy	0.8441	0.1559	0.8674	0.8441	0.8541	0.8541	0.1459	0.6981	0.8487	0.8192	0.1809	0.8511	0.8192	0.8391	0.8391	0.1609	0.658	0.8276
VotedPerceptron	OneR	100*	functions	0.8683	0.1317	0.8889	0.8683	0.879	0.879	0.121	0.7472	0.8733	0.8458	0.1543	0.8723	0.8458	0.8625	0.8625	0.1375	0.708	0.8532
KStar	OneR	100*	lazy	0.7137	0.2863	0.6864	0.7137	0.6901	0.6901	0.3099	0.4031	0.6786	0.7926	0.2075	0.7589	0.7926	0.7601	0.7601	0.24	0.5517	0.7523
IBk	OneR	100*	lazy	0.8441	0.1559	0.8674	0.8441	0.8541	0.8541	0.1459	0.6981	0.8487	0.8192	0.1809	0.8511	0.8192	0.8391	0.8391	0.1609	0.658	0.8276
RBFNetwork	OneR	100*	functions	0.8548	0.1452	0.8674	0.8548	0.8494	0.8494	0.1506	0.7042	0.852	0.8511	0.1489	0.8794	0.8511	0.873	0.873	0.127	0.7237	0.8605
MultilayerPerceptron	OneR	100*	functions	0.9032	0.0968	0.914	0.9032	0.9032	0.9032	0.0968	0.8065	0.9032	0.8564	0.1437	0.844	0.8564	0.8255	0.8255	0.1746	0.6811	0.8338
SPegasos	OneR	100*	functions	0.5027	0.4973	0.6685	0.5027	0.8339	0.8339	0.1661	0.0599	0.4058	0.5	0.5	0.6667	0.5	0.3334	0.3334	0.6667	-1	0.4
DMNBtext	SymmerU	30	bayes	0.8454	0.1546	0.8853	0.8454	0.8939	0.8939	0.1061	0.7377	0.8633	0.8032	0.1968	0.844	0.8032	0.8367	0.8367	0.1633	0.639	0.816
DecisionStump	SymmerU	10	trees	0.8992	0.1008	0.9086	0.8992	0.8961	0.8961	0.1039	0.7952	0.8976	0.867	0.133	0.8865	0.867	0.8754	0.8754	0.1247	0.7423	0.8709
LogitBoost	ReliefF	50	meta	0.8777	0.1223	0.8925	0.8777	0.8798	0.8798	0.1202	0.7574	0.8787	0.8617	0.1383	0.8865	0.8617	0.8793	0.8793	0.1208	0.7407	0.8695
MultilayerPerceptron	GainRatio	100*	functions	0.875	0.125	0.8961	0.875	0.8883	0.8883	0.1117	0.7632	0.8811	0.8724	0.1276	0.8794	0.8724	0.8616	0.8616	0.1385	0.7338	0.8664
ZeroR	SymmerU	50	rules	0.5	0.5	0.6667	0.5	-0.1667	-0.1667	0.6667	-1	0.4	0.5	0.5	0.6667	0.5	0.3334	0.3334	0.6667	-1	0.4
OneR	SymmerU	50	rules	0.8898	0.1102	0.914	0.8898	0.9145	0.9145	0.0855	0.8039	0.9004	0.867	0.133	0.8865	0.867	0.8754	0.8754	0.1247	0.7423	0.8709
PART	SymmerU	50	rules	0.8763	0.1237	0.8907	0.8763	0.8774	0.8774	0.1226	0.7537	0.8769	0.8617	0.1383	0.8865	0.8617	0.8793	0.8793	0.1208	0.7407	0.8695
Decorate	SymmerU	30	meta	0.9005	0.0995	0.9158	0.9005	0.9085	0.9085	0.0915	0.809	0.9043	0.8617	0.1383	0.8794	0.8617	0.8657	0.8657	0.1343	0.7274	0.8637
IB1	GainRatio	100*	lazy	0.8145	0.1855	0.8459	0.8145	0.8321	0.8321	0.1679	0.6464	0.8221	0.7819	0.2181	0.8298	0.7819	0.8237	0.8237	0.1764	0.6041	0.7966
IBk	GainRatio	100*	lazy	0.8145	0.1855	0.8459	0.8145	0.8321	0.8321	0.1679	0.6464	0.8221	0.7819	0.2181	0.8298	0.7819	0.8237	0.8237	0.1764	0.6041	0.7966
DecisionTable	SymmerU	50	rules	0.8965	0.1035	0.9122	0.8965	0.9044	0.9044	0.0956	0.8009	0.9003	0.8671	0.1329	0.8794	0.8671	0.8633	0.8633	0.1367	0.7303	0.8651
LWL	GainRatio	100*	lazy	0.9005	0.0995	0.9104	0.9005	0.8984	0.8984	0.1016	0.799	0.8995	0.8617	0.1383	0.8794	0.8617	0.8657	0.8657	0.1343	0.7274	0.8637
AdaBoostM1	GainRatio	100*	meta	0.8911	0.1089	0.9032	0.8911	0.8911	0.8911	0.1089	0.7823	0.8911	0.867	0.133	0.8865	0.867	0.8754	0.8754	0.1247	0.7423	0.8709
ADTree	SymmerU	50	trees	0.8938	0.1062	0.9122	0.8938	0.9065	0.9065	0.0935	0.8003	0.8997	0.8777	0.1223	0.8865	0.8777	0.8701	0.8701	0.1299	0.7477	0.8737
BFTree	SymmerU	50	trees	0.8938	0.1062	0.9122	0.8938	0.9065	0.9065	0.0935	0.8003	0.8997	0.8404	0.1596	0.8582	0.8404	0.8404	0.8404	0.1596	0.6809	0.8404
Dagging	OneR	50	meta	0.9207	0.0793	0.9229	0.9207	0.9093	0.9093	0.0907	0.8299	0.9145	0.8883	0.1117	0.8936	0.8883	0.8771	0.8771	0.123	0.7652	0.8822
Bagging	OneR	50	meta	0.9099	0.0901	0.9229	0.9099	0.9157	0.9157	0.0843	0.8256	0.9127	0.883	0.117	0.8936	0.883	0.879	0.879	0.121	0.762	0.8809
END	OneR	50	meta	0.8871	0.1129	0.8996	0.8871	0.8871	0.8871	0.1129	0.7742	0.8871	0.8511	0.149	0.8723	0.8511	0.859	0.859	0.141	0.71	0.8548
Decorate	OneR	50	meta	0.9059	0.0941	0.9176	0.9059	0.9081	0.9081	0.0919	0.814	0.907	0.8617	0.1383	0.8794	0.8617	0.8657	0.8657	0.1343	0.7274	0.8637
LogitBoost	OneR	50	meta	0.9046	0.0954	0.9122	0.9046	0.8993	0.8993	0.1007	0.8039	0.9019	0.867	0.133	0.8865	0.867	0.8754	0.8754	0.1247	0.7423	0.8709
FilteredClassifier	OneR	50	meta	0.8777	0.1223	0.8961	0.8777	0.8864	0.8864	0.1136	0.764	0.8818	0.8564	0.1437	0.8794	0.8564	0.8689	0.8689	0.1311	0.7252	0.8621
MultiClassClassifier	OneR	50	meta	0.8777	0.1223	0.8835	0.8777	0.8658	0.8658	0.1342	0.7434	0.8711	0.8671	0.133	0.8723	0.8671	0.8533	0.8533	0.1468	0.7202	0.8593
MultiBoostAB	OneR	50	meta	0.9019	0.0981	0.914	0.9019	0.9041	0.9041	0.0959	0.806	0.903	0.867	0.133	0.8865	0.867	0.8754	0.8754	0.1247	0.7423	0.8709
VFI	OneR	50	misc	0.8508	0.1492	0.8387	0.8508	0.8202	0.8202	0.1798	0.6703	0.8282	0.8351	0.1649	0.8156	0.8351	0.8013	0.8013	0.1987	0.6355	0.8062
HyperPipes	OneR	50	misc	0.8468	0.1532	0.8333	0.8468	0.8154	0.8154	0.1846	0.6614	0.823	0.8298	0.1702	0.8085	0.8298	0.7957	0.7957	0.2044	0.6245	0.7995
AdaBoostM1	OneR	10	meta	0.8992	0.1008	0.9086	0.8992	0.8961	0.8961	0.1039	0.7952	0.8976	0.867	0.133	0.8865	0.867	0.8754	0.8754	0.1247	0.7423	0.8709
RandomForest	ReliefF	30	trees	0.879	0.121	0.8943	0.879	0.8822	0.8822	0.1178	0.7612	0.8806	0.883	0.117	0.9007	0.883	0.8917	0.8917	0.1083	0.7746	0.8871
NBTree	ReliefF	30	trees	0.879	0.121	0.8925	0.879	0.879	0.879	0.121	0.7581	0.879	0.8351	0.1649	0.8511	0.8351	0.8317	0.8317	0.1684	0.6668	0.8333
LMT	ReliefF	30	trees	0.8911	0.1089	0.9014	0.8911	0.8881	0.8881	0.1119	0.7792	0.8896	0.8511	0.149	0.8652	0.8511	0.8475	0.8475	0.1526	0.6985	0.8492
LADTree	ReliefF	30	trees	0.8522	0.1478	0.8728	0.8522	0.8592	0.8592	0.1408	0.7113	0.8555	0.867	0.133	0.8865	0.867	0.8754	0.8754	0.1247	0.7423	0.8709
J48graft	ReliefF	30	trees	0.8777	0.1223	0.8925	0.8777	0.8798	0.8798	0.1202	0.7574	0.8787	0.8564	0.1437	0.8794	0.8564	0.8689	0.8689	0.1311	0.7252	0.8621
J48	ReliefF	30	trees	0.875	0.125	0.8853	0.875	0.8692	0.8692	0.1308	0.7442	0.872	0.8564	0.1437	0.8794	0.8564	0.8689	0.8689	0.1311	0.7252	0.8621
FT	ReliefF	30	trees	0.8817	0.1183	0.8978	0.8817	0.8871	0.8871	0.1129	0.7688	0.8843	0.8138	0.1862	0.8227	0.8138	0.7996	0.7996	0.2005	0.6133	0.8055
DecisionStump	ReliefF	30	trees	0.8548	0.1452	0.8674	0.8548	0.8494	0.8494	0.1506	0.7042	0.852	0.8511	0.149	0.8723	0.8511	0.859	0.859	0.141	0.71	0.8548
REPTree	ReliefF	30	trees	0.8548	0.1452	0.8817	0.8548	0.8747	0.8747	0.1253	0.7293	0.8635	0.8564	0.1437	0.8794	0.8564	0.8689	0.8689	0.1311	0.7252	0.8621
RandomTree	ReliefF	30	trees	0.8199	0.1801	0.8387	0.8199	0.8182	0.8182	0.1818	0.6381	0.819	0.8458	0.1543	0.8511	0.8458	0.8301	0.8301	0.17	0.6756	0.8366
BFTree	InfoGain	50	trees	0.8925	0.1075	0.914	0.8925	0.9117	0.9117	0.0883	0.8039	0.901	0.867	0.133	0.8865	0.867	0.8754	0.8754	0.1247	0.7423	0.8709
IBk	InfoGain	50	lazy	0.8522	0.1478	0.8674	0.8522	0.8503	0.8503	0.1497	0.7024	0.8512	0.8511	0.1489	0.8794	0.8511	0.873	0.873	0.127	0.7237	0.8605
Logistic	SymmerU	30	functions	0.8777	0.1223	0.8871	0.8777	0.871	0.871	0.129	0.7486	0.8741	0.8829	0.1171	0.8794	0.8829	0.8602	0.8602	0.1399	0.7428	0.8689
LADTree	SymmerU	10	trees	0.8911	0.1089	0.9104	0.8911	0.905	0.905	0.095	0.796	0.8975	0.8405	0.1596	0.8723	0.8405	0.8669	0.8669	0.1332	0.7068	0.8514
VotedPerceptron	GainRatio	10	functions	0.8414	0.1586	0.8835	0.8414	0.8945	0.8945	0.1055	0.7339	0.8604	0.8086	0.1915	0.8511	0.8086	0.8483	0.8483	0.1518	0.6555	0.8232
IBk	ReliefF	100*	lazy	0.8696	0.1304	0.8961	0.8696	0.893	0.893	0.107	0.7623	0.8797	0.8404	0.1596	0.8582	0.8404	0.8404	0.8404	0.1596	0.6809	0.8404
KStar	ReliefF	100*	lazy	0.8629	0.1371	0.8943	0.8629	0.8958	0.8958	0.1042	0.758	0.8762	0.8351	0.1649	0.8652	0.8351	0.8561	0.8561	0.144	0.6908	0.8441
VotedPerceptron	ReliefF	100*	functions	0.8414	0.1586	0.8746	0.8414	0.8709	0.8709	0.1291	0.7117	0.8534	0.8139	0.1862	0.844	0.8139	0.829	0.829	0.171	0.6427	0.8205
IB1	ReliefF	100*	lazy	0.8696	0.1304	0.8961	0.8696	0.893	0.893	0.107	0.7623	0.8797	0.8404	0.1596	0.8582	0.8404	0.8404	0.8404	0.1596	0.6809	0.8404
SimpleLogistic	ReliefF	100*	functions	0.9005	0.0995	0.9176	0.9005	0.9122	0.9122	0.0878	0.8127	0.906	0.8564	0.1436	0.8723	0.8564	0.8564	0.8564	0.1436	0.7128	0.8564
SPegasos	ReliefF	100*	functions	0.5	0.5	0.6667	0.5	-0.1667	-0.1667	0.6667	-1	0.4	0.5	0.5	0.6667	0.5	0.3334	0.3334	0.6667	-1	0.4
MultilayerPerceptron	ReliefF	100*	functions	0.8871	0.1129	0.9014	0.8871	0.8903	0.8903	0.1097	0.7774	0.8887	0.8671	0.1329	0.8794	0.8671	0.8633	0.8633	0.1367	0.7303	0.8651
RBFNetwork	ReliefF	100*	functions	0.8817	0.1183	0.8853	0.8817	0.8673	0.8673	0.1327	0.7489	0.8736	0.8617	0.1383	0.8723	0.8617	0.8545	0.8545	0.1456	0.7161	0.8579
LWL	ReliefF	100*	lazy	0.8589	0.1411	0.8746	0.8589	0.8589	0.8589	0.1411	0.7177	0.8589	0.8564	0.1436	0.8723	0.8564	0.8564	0.8564	0.1436	0.7128	0.8564
AdaBoostM1	ReliefF	100*	meta	0.8642	0.1358	0.8763	0.8642	0.8595	0.8595	0.1405	0.7238	0.8618	0.8511	0.1489	0.8794	0.8511	0.873	0.873	0.127	0.7237	0.8605
J48	SymmerU	30	trees	0.9126	0.0874	0.9229	0.9126	0.9138	0.9138	0.0862	0.8264	0.9132	0.8404	0.1596	0.8582	0.8404	0.8404	0.8404	0.1596	0.6809	0.8404
NaiveBayes	SymmerU	30	bayes	0.8965	0.1035	0.8907	0.8965	0.872	0.872	0.128	0.7681	0.8813	0.8829	0.1171	0.8794	0.8829	0.8602	0.8602	0.1399	0.7428	0.8689
Bagging	SymmerU	100*	meta	0.9059	0.0941	0.9194	0.9059	0.9116	0.9116	0.0884	0.8175	0.9087	0.8936	0.1064	0.9007	0.8936	0.8858	0.8858	0.1143	0.7793	0.8895
HyperPipes	GainRatio	50	misc	0.7809	0.2191	0.7419	0.7809	0.7502	0.7502	0.2498	0.5303	0.7365	0.782	0.2181	0.7305	0.782	0.7543	0.7543	0.2457	0.5355	0.7274
VFI	GainRatio	50	misc	0.8306	0.1694	0.8746	0.8306	0.8838	0.8838	0.1162	0.7124	0.8494	0.7979	0.2021	0.844	0.7979	0.842	0.842	0.158	0.6383	0.8135
FilteredClassifier	GainRatio	50	meta	0.8911	0.1089	0.9068	0.8911	0.8978	0.8978	0.1022	0.7889	0.8943	0.8085	0.1915	0.8369	0.8085	0.8194	0.8194	0.1807	0.6278	0.8135
LogitBoost	GainRatio	50	meta	0.8992	0.1008	0.9104	0.8992	0.8992	0.8992	0.1008	0.7984	0.8992	0.867	0.133	0.8865	0.867	0.8754	0.8754	0.1247	0.7423	0.8709
MultiBoostAB	GainRatio	50	meta	0.9005	0.0995	0.914	0.9005	0.905	0.905	0.095	0.8055	0.9027	0.8617	0.1383	0.8794	0.8617	0.8657	0.8657	0.1343	0.7274	0.8637
MultiClassClassifier	GainRatio	50	meta	0.8401	0.1599	0.871	0.8401	0.8641	0.8641	0.1359	0.7038	0.8501	0.8777	0.1223	0.8936	0.8777	0.8818	0.8818	0.1182	0.7595	0.8797
Bagging	GainRatio	50	meta	0.9086	0.0914	0.9229	0.9086	0.9167	0.9167	0.0833	0.8253	0.9125	0.883	0.117	0.8936	0.883	0.879	0.879	0.121	0.762	0.8809
Dagging	GainRatio	50	meta	0.8817	0.1183	0.9086	0.8817	0.9102	0.9102	0.0898	0.7914	0.8937	0.8351	0.1649	0.8652	0.8351	0.8561	0.8561	0.144	0.6908	0.8441
Decorate	GainRatio	50	meta	0.9032	0.0968	0.9176	0.9032	0.9101	0.9101	0.0899	0.8133	0.9065	0.8458	0.1543	0.8511	0.8458	0.8301	0.8301	0.17	0.6756	0.8366
END	GainRatio	50	meta	0.8871	0.1129	0.9032	0.8871	0.8937	0.8937	0.1063	0.7807	0.8902	0.8511	0.149	0.8652	0.8511	0.8475	0.8475	0.1526	0.6985	0.8492
NBTree	GainRatio	10	trees	0.8978	0.1022	0.9158	0.8978	0.9107	0.9107	0.0893	0.8085	0.9038	0.8829	0.1171	0.8794	0.8829	0.8602	0.8602	0.1399	0.7428	0.8689
IB1	GainRatio	10	lazy	0.8508	0.1492	0.862	0.8508	0.8429	0.8429	0.1571	0.6937	0.8466	0.8192	0.1809	0.8511	0.8192	0.8391	0.8391	0.1609	0.658	0.8276
REPTree	ReliefF	50	trees	0.8535	0.1465	0.871	0.8535	0.8554	0.8554	0.1446	0.7089	0.8544	0.8404	0.1596	0.8582	0.8404	0.8404	0.8404	0.1596	0.6809	0.8404
END	GainRatio	100*	meta	0.8871	0.1129	0.8996	0.8871	0.8871	0.8871	0.1129	0.7742	0.8871	0.8458	0.1543	0.8582	0.8458	0.8389	0.8389	0.1612	0.6846	0.8421
FilteredClassifier	SymmerU	30	meta	0.8831	0.1169	0.9014	0.8831	0.893	0.893	0.107	0.776	0.8877	0.8724	0.1276	0.8794	0.8724	0.8616	0.8616	0.1385	0.7338	0.8664
RBFNetwork	InfoGain	30	functions	0.9073	0.0927	0.914	0.9073	0.901	0.901	0.099	0.8082	0.904	0.8724	0.1276	0.8865	0.8724	0.8724	0.8724	0.1276	0.7447	0.8724
MultilayerPerceptron	InfoGain	30	functions	0.8978	0.1022	0.9014	0.8978	0.8853	0.8853	0.1147	0.7831	0.891	0.8829	0.1171	0.8865	0.8829	0.8686	0.8686	0.1314	0.7515	0.8749
SPegasos	InfoGain	30	functions	0.5013	0.4987	0.6667	0.5013	0.5836	0.5836	0.4164	0.0212	0.4051	0.5054	0.4947	0.6667	0.5054	0.5846	0.5846	0.4155	0.0424	0.4196
SimpleLogistic	InfoGain	30	functions	0.8978	0.1022	0.8996	0.8978	0.8828	0.8828	0.1172	0.7805	0.8894	0.899	0.1011	0.9007	0.899	0.884	0.884	0.116	0.7828	0.8905
IB1	InfoGain	30	lazy	0.8683	0.1317	0.8835	0.8683	0.8693	0.8693	0.1307	0.7376	0.8688	0.8936	0.1064	0.9007	0.8936	0.8858	0.8858	0.1143	0.7793	0.8895
VotedPerceptron	InfoGain	30	functions	0.7177	0.2823	0.8047	0.7177	0.8484	0.8484	0.1516	0.5508	0.7395	0.7234	0.2766	0.8014	0.7234	0.8207	0.8207	0.1793	0.5353	0.7435
KStar	InfoGain	30	lazy	0.8414	0.1586	0.8262	0.8414	0.8092	0.8092	0.1908	0.6498	0.816	0.7978	0.2022	0.773	0.7978	0.7654	0.7654	0.2346	0.5624	0.7644
IBk	InfoGain	30	lazy	0.8683	0.1317	0.8835	0.8683	0.8693	0.8693	0.1307	0.7376	0.8688	0.8936	0.1064	0.9007	0.8936	0.8858	0.8858	0.1143	0.7793	0.8895
AdaBoostM1	InfoGain	30	meta	0.8978	0.1022	0.9086	0.8978	0.8968	0.8968	0.1032	0.7946	0.8973	0.867	0.133	0.8865	0.867	0.8754	0.8754	0.1247	0.7423	0.8709
LWL	InfoGain	30	lazy	0.8992	0.1008	0.9086	0.8992	0.8961	0.8961	0.1039	0.7952	0.8976	0.867	0.133	0.8865	0.867	0.8754	0.8754	0.1247	0.7423	0.8709
DecisionTable	ReliefF	30	rules	0.8669	0.1331	0.8781	0.8669	0.8613	0.8613	0.1387	0.7282	0.864	0.8617	0.1383	0.8723	0.8617	0.8545	0.8545	0.1456	0.7161	0.8579
LogitBoost	ReliefF	30	meta	0.8696	0.1304	0.8835	0.8696	0.8686	0.8686	0.1314	0.7383	0.8691	0.8511	0.149	0.8723	0.8511	0.859	0.859	0.141	0.71	0.8548
ComplementNaiveBayes	GainRatio	100*	bayes	0.8642	0.1358	0.8853	0.8642	0.8749	0.8749	0.1251	0.739	0.8692	0.8458	0.1543	0.8723	0.8458	0.8625	0.8625	0.1375	0.708	0.8532
FT	ReliefF	50	trees	0.8683	0.1317	0.8817	0.8683	0.8663	0.8663	0.1337	0.7346	0.8673	0.8351	0.1649	0.844	0.8351	0.8226	0.8226	0.1775	0.6575	0.828
J48	ReliefF	50	trees	0.8414	0.1586	0.8656	0.8414	0.8524	0.8524	0.1476	0.6937	0.8465	0.8245	0.1755	0.844	0.8245	0.8245	0.8245	0.1755	0.6489	0.8245
DecisionStump	InfoGain	100*	trees	0.8992	0.1008	0.9086	0.8992	0.8961	0.8961	0.1039	0.7952	0.8976	0.867	0.133	0.8865	0.867	0.8754	0.8754	0.1247	0.7423	0.8709
FT	InfoGain	100*	trees	0.8884	0.1116	0.9014	0.8884	0.8895	0.8895	0.1105	0.7779	0.889	0.8564	0.1437	0.8794	0.8564	0.8689	0.8689	0.1311	0.7252	0.8621
J48	InfoGain	100*	trees	0.8535	0.1465	0.8656	0.8535	0.8472	0.8472	0.1528	0.7007	0.8502	0.8245	0.1755	0.8369	0.8245	0.8151	0.8151	0.185	0.6395	0.8193
J48graft	InfoGain	100*	trees	0.9046	0.0954	0.9158	0.9046	0.9057	0.9057	0.0943	0.8102	0.9051	0.8511	0.149	0.8723	0.8511	0.859	0.859	0.141	0.71	0.8548
LADTree	InfoGain	100*	trees	0.8737	0.1263	0.8889	0.8737	0.8757	0.8757	0.1243	0.7494	0.8747	0.8458	0.1543	0.8652	0.8458	0.8495	0.8495	0.1505	0.6953	0.8476
LMT	InfoGain	100*	trees	0.9005	0.0995	0.9068	0.9005	0.8925	0.8925	0.1075	0.793	0.8963	0.8724	0.1276	0.8865	0.8724	0.8724	0.8724	0.1276	0.7447	0.8724
NBTree	InfoGain	100*	trees	0.8925	0.1075	0.905	0.8925	0.8935	0.8935	0.1065	0.786	0.893	0.883	0.117	0.8936	0.883	0.879	0.879	0.121	0.762	0.8809
RandomForest	InfoGain	100*	trees	0.8911	0.1089	0.9014	0.8911	0.8881	0.8881	0.1119	0.7792	0.8896	0.8777	0.1223	0.8865	0.8777	0.8701	0.8701	0.1299	0.7477	0.8737
RandomTree	InfoGain	100*	trees	0.8602	0.1398	0.8799	0.8602	0.8674	0.8674	0.1326	0.7276	0.8636	0.8298	0.1702	0.8369	0.8298	0.8149	0.8149	0.1851	0.6444	0.821
REPTree	InfoGain	100*	trees	0.9019	0.0981	0.9194	0.9019	0.9149	0.9149	0.0851	0.8167	0.9079	0.8458	0.1543	0.8582	0.8458	0.8389	0.8389	0.1612	0.6846	0.8421
LMT	ReliefF	50	trees	0.8978	0.1022	0.9122	0.8978	0.9034	0.9034	0.0966	0.8012	0.9005	0.8511	0.149	0.8652	0.8511	0.8475	0.8475	0.1526	0.6985	0.8492
LibSVM	GainRatio	10	functions	0.6841	0.3159	0.7796	0.6841	0.8169	0.8169	0.1831	0.4831	0.7003	0.7181	0.2819	0.7943	0.7181	0.8045	0.8045	0.1955	0.5154	0.7366
END	ReliefF	30	meta	0.875	0.125	0.8853	0.875	0.8692	0.8692	0.1308	0.7442	0.872	0.8564	0.1437	0.8794	0.8564	0.8689	0.8689	0.1311	0.7252	0.8621
SimpleLogistic	OneR	10	functions	0.9005	0.0995	0.9068	0.9005	0.8925	0.8925	0.1075	0.793	0.8963	0.8883	0.1117	0.9007	0.8883	0.8883	0.8883	0.1117	0.7766	0.8883
BayesianLogisticRegression	GainRatio	10	bayes	0.4718	0.5282	0.4122	0.4718	0.4708	0.4708	0.5292	-0.0574	0.4119	0.4628	0.5373	0.383	0.4628	0.4557	0.4557	0.5444	-0.0813	0.3785
MultilayerPerceptron	OneR	10	functions	0.9113	0.0887	0.9158	0.9113	0.902	0.902	0.098	0.8133	0.9063	0.8883	0.1117	0.9007	0.8883	0.8883	0.8883	0.1117	0.7766	0.8883
RBFNetwork	OneR	10	functions	0.8925	0.1075	0.9068	0.8925	0.8968	0.8968	0.1032	0.7893	0.8946	0.8777	0.1223	0.8936	0.8777	0.8818	0.8818	0.1182	0.7595	0.8797
IBk	OneR	10	lazy	0.8212	0.1788	0.8387	0.8212	0.8179	0.8179	0.1821	0.6391	0.8195	0.8192	0.1809	0.844	0.8192	0.8264	0.8264	0.1736	0.6455	0.8226
KStar	OneR	10	lazy	0.875	0.125	0.871	0.875	0.8512	0.8512	0.1488	0.7259	0.86	0.8617	0.1383	0.8723	0.8617	0.8545	0.8545	0.1456	0.7161	0.8579
VotedPerceptron	OneR	10	functions	0.5027	0.4973	0.6685	0.5027	0.8339	0.8339	0.1661	0.0599	0.4058	0.5	0.5	0.6667	0.5	0.3334	0.3334	0.6667	-1	0.4
ComplementNaiveBayes	GainRatio	10	bayes	0.8898	0.1102	0.9068	0.8898	0.8987	0.8987	0.1013	0.7885	0.894	0.8245	0.1756	0.8582	0.8245	0.8497	0.8497	0.1503	0.6736	0.8348
VotedPerceptron	GainRatio	30	functions	0.8777	0.1223	0.905	0.8777	0.9059	0.9059	0.0941	0.7831	0.8895	0.867	0.133	0.8865	0.867	0.8754	0.8754	0.1247	0.7423	0.8709
J48graft	SymmerU	10	trees	0.9126	0.0874	0.9265	0.9126	0.9209	0.9209	0.0791	0.8334	0.9165	0.8777	0.1223	0.8936	0.8777	0.8818	0.8818	0.1182	0.7595	0.8797
HyperPipes	SymmerU	100*	misc	0.8669	0.1331	0.8728	0.8669	0.8538	0.8538	0.1462	0.7206	0.8596	0.8404	0.1596	0.8298	0.8404	0.8109	0.8109	0.1891	0.6506	0.8186
VotedPerceptron	ReliefF	30	functions	0.8199	0.1801	0.8548	0.8199	0.8463	0.8463	0.1537	0.6657	0.8306	0.8404	0.1596	0.8582	0.8404	0.8404	0.8404	0.1596	0.6809	0.8404
NaiveBayesMultinomialUpdateable	SymmerU	30	bayes	0.8777	0.1223	0.9032	0.8777	0.9016	0.9016	0.0984	0.7789	0.888	0.8511	0.1489	0.8794	0.8511	0.873	0.873	0.127	0.7237	0.8605
NaiveBayesMultinomialUpdateable	SymmerU	50	bayes	0.879	0.121	0.9014	0.879	0.8963	0.8963	0.1037	0.7751	0.8867	0.8564	0.1437	0.8794	0.8564	0.8689	0.8689	0.1311	0.7252	0.8621
Decorate	SymmerU	100*	meta	0.9153	0.0847	0.9265	0.9153	0.9188	0.9188	0.0812	0.8341	0.917	0.8724	0.1276	0.8865	0.8724	0.8724	0.8724	0.1276	0.7447	0.8724
ComplementNaiveBayes	SymmerU	30	bayes	0.8952	0.1048	0.9122	0.8952	0.9054	0.9054	0.0946	0.8005	0.9	0.867	0.133	0.8865	0.867	0.8754	0.8754	0.1247	0.7423	0.8709
BayesNet	SymmerU	30	bayes	0.914	0.086	0.9247	0.914	0.9162	0.9162	0.0838	0.8302	0.9151	0.8724	0.1276	0.8865	0.8724	0.8724	0.8724	0.1276	0.7447	0.8724
LogitBoost	SymmerU	100*	meta	0.8978	0.1022	0.9122	0.8978	0.9034	0.9034	0.0966	0.8012	0.9005	0.8724	0.1276	0.8865	0.8724	0.8724	0.8724	0.1276	0.7447	0.8724
NaiveBayes	SymmerU	50	bayes	0.8978	0.1022	0.8961	0.8978	0.8781	0.8781	0.1219	0.7757	0.8862	0.8723	0.1277	0.8723	0.8723	0.8527	0.8527	0.1473	0.7248	0.8606
MultiClassClassifier	SymmerU	100*	meta	0.8078	0.1922	0.8154	0.8078	0.792	0.792	0.208	0.5996	0.7982	0.8457	0.1543	0.8369	0.8457	0.8173	0.8173	0.1827	0.6624	0.8256
J48	OneR	100*	trees	0.871	0.129	0.8871	0.871	0.874	0.874	0.126	0.745	0.8725	0.7978	0.2022	0.8298	0.7978	0.8122	0.8122	0.1878	0.61	0.8041
HyperPipes	GainRatio	100*	misc	0.8132	0.1868	0.7885	0.8132	0.7794	0.7794	0.2206	0.5916	0.78	0.7979	0.2021	0.7589	0.7979	0.7651	0.7651	0.2349	0.562	0.7534
DecisionStump	OneR	100*	trees	0.8992	0.1008	0.9086	0.8992	0.8961	0.8961	0.1039	0.7952	0.8976	0.867	0.133	0.8865	0.867	0.8754	0.8754	0.1247	0.7423	0.8709
KStar	ReliefF	30	lazy	0.8602	0.1398	0.8817	0.8602	0.8707	0.8707	0.1293	0.7309	0.8651	0.8351	0.1649	0.8652	0.8351	0.8561	0.8561	0.144	0.6908	0.8441
NaiveBayesMultinomial	SymmerU	50	bayes	0.9019	0.0981	0.9122	0.9019	0.9008	0.9008	0.0992	0.8027	0.9013	0.867	0.133	0.8865	0.867	0.8754	0.8754	0.1247	0.7423	0.8709
RandomForest	OneR	100*	trees	0.9032	0.0968	0.9176	0.9032	0.9101	0.9101	0.0899	0.8133	0.9065	0.883	0.117	0.8936	0.883	0.879	0.879	0.121	0.762	0.8809
REPTree	SymmerU	50	trees	0.9086	0.0914	0.9194	0.9086	0.9097	0.9097	0.0903	0.8183	0.9092	0.8564	0.1436	0.8723	0.8564	0.8564	0.8564	0.1436	0.7128	0.8564
RandomTree	SymmerU	50	trees	0.8427	0.1573	0.8548	0.8427	0.835	0.835	0.165	0.6777	0.8386	0.8511	0.149	0.8652	0.8511	0.8475	0.8475	0.1526	0.6985	0.8492
RandomForest	SymmerU	50	trees	0.9086	0.0914	0.9158	0.9086	0.9033	0.9033	0.0967	0.8119	0.9059	0.8564	0.1436	0.8723	0.8564	0.8564	0.8564	0.1436	0.7128	0.8564
NBTree	SymmerU	50	trees	0.9073	0.0927	0.9158	0.9073	0.9041	0.9041	0.0959	0.8113	0.9056	0.8777	0.1223	0.8936	0.8777	0.8818	0.8818	0.1182	0.7595	0.8797
FilteredClassifier	ReliefF	50	meta	0.8562	0.1438	0.871	0.8562	0.8543	0.8543	0.1457	0.7105	0.8552	0.8298	0.1702	0.8582	0.8298	0.8458	0.8458	0.1542	0.6754	0.8368
Decorate	GainRatio	100*	meta	0.9113	0.0887	0.9265	0.9113	0.922	0.922	0.078	0.8332	0.9163	0.8617	0.1383	0.8794	0.8617	0.8657	0.8657	0.1343	0.7274	0.8637
Decorate	ReliefF	50	meta	0.8858	0.1142	0.9032	0.8858	0.8946	0.8946	0.1054	0.7803	0.8899	0.867	0.133	0.8865	0.867	0.8754	0.8754	0.1247	0.7423	0.8709
END	ReliefF	50	meta	0.8414	0.1586	0.8656	0.8414	0.8524	0.8524	0.1476	0.6937	0.8465	0.8245	0.1755	0.844	0.8245	0.8245	0.8245	0.1755	0.6489	0.8245
FT	SymmerU	50	trees	0.8871	0.1129	0.8978	0.8871	0.884	0.884	0.116	0.7711	0.8855	0.8564	0.1436	0.8652	0.8564	0.8461	0.8461	0.154	0.7024	0.8507
Dagging	ReliefF	50	meta	0.8871	0.1129	0.8961	0.8871	0.8811	0.8811	0.1189	0.7682	0.884	0.8617	0.1383	0.8723	0.8617	0.8545	0.8545	0.1456	0.7161	0.8579
ADTree	GainRatio	30	trees	0.8911	0.1089	0.9032	0.8911	0.8911	0.8911	0.1089	0.7823	0.8911	0.8777	0.1223	0.8865	0.8777	0.8701	0.8701	0.1299	0.7477	0.8737
BFTree	GainRatio	30	trees	0.8925	0.1075	0.9122	0.8925	0.9077	0.9077	0.0923	0.8	0.8994	0.867	0.133	0.8865	0.867	0.8754	0.8754	0.1247	0.7423	0.8709
NBTree	SymmerU	30	trees	0.8992	0.1008	0.914	0.8992	0.906	0.906	0.094	0.8051	0.9024	0.8724	0.1276	0.8865	0.8724	0.8724	0.8724	0.1276	0.7447	0.8724
ConjunctiveRule	GainRatio	30	rules	0.8844	0.1156	0.9014	0.8844	0.8921	0.8921	0.1079	0.7764	0.888	0.867	0.133	0.8865	0.867	0.8754	0.8754	0.1247	0.7423	0.8709
DecisionTable	GainRatio	30	rules	0.8898	0.1102	0.9086	0.8898	0.9024	0.9024	0.0976	0.7921	0.8956	0.8511	0.149	0.8723	0.8511	0.859	0.859	0.141	0.71	0.8548
DTNB	GainRatio	30	rules	0.9126	0.0874	0.9247	0.9126	0.9172	0.9172	0.0828	0.8298	0.9149	0.883	0.117	0.8936	0.883	0.879	0.879	0.121	0.762	0.8809
NNge	InfoGain	50	rules	0.8925	0.1075	0.9122	0.8925	0.9077	0.9077	0.0923	0.8	0.8994	0.8458	0.1543	0.8723	0.8458	0.8625	0.8625	0.1375	0.708	0.8532
OneR	GainRatio	30	rules	0.8898	0.1102	0.914	0.8898	0.9145	0.9145	0.0855	0.8039	0.9004	0.867	0.133	0.8865	0.867	0.8754	0.8754	0.1247	0.7423	0.8709
PART	GainRatio	30	rules	0.9046	0.0954	0.9158	0.9046	0.9057	0.9057	0.0943	0.8102	0.9051	0.8777	0.1223	0.8865	0.8777	0.8701	0.8701	0.1299	0.7477	0.8737
Ridor	GainRatio	30	rules	0.8817	0.1183	0.9032	0.8817	0.8978	0.8978	0.1022	0.7794	0.889	0.9043	0.0958	0.9078	0.9043	0.8926	0.8926	0.1075	0.7967	0.8979
ZeroR	GainRatio	30	rules	0.5	0.5	0.6667	0.5	-0.1667	-0.1667	0.6667	-1	0.4	0.5	0.5	0.6667	0.5	0.3334	0.3334	0.6667	-1	0.4
DTNB	GainRatio	100*	rules	0.9126	0.0874	0.9247	0.9126	0.9172	0.9172	0.0828	0.8298	0.9149	0.8511	0.149	0.8723	0.8511	0.859	0.859	0.141	0.71	0.8548
VFI	ReliefF	50	misc	0.6949	0.3051	0.6792	0.6949	0.6735	0.6735	0.3265	0.3677	0.6679	0.7074	0.2925	0.6525	0.7074	0.6914	0.6914	0.3086	0.3985	0.6507
REPTree	SymmerU	30	trees	0.9032	0.0968	0.9211	0.9032	0.9176	0.9176	0.0824	0.8207	0.9098	0.867	0.133	0.8865	0.867	0.8754	0.8754	0.1247	0.7423	0.8709
ConjunctiveRule	GainRatio	100*	rules	0.8817	0.1183	0.8996	0.8817	0.8905	0.8905	0.1095	0.7721	0.8858	0.867	0.133	0.8865	0.867	0.8754	0.8754	0.1247	0.7423	0.8709
Ridor	InfoGain	10	rules	0.8965	0.1035	0.914	0.8965	0.9081	0.9081	0.0919	0.8045	0.9019	0.8458	0.1543	0.8723	0.8458	0.8625	0.8625	0.1375	0.708	0.8532
ZeroR	InfoGain	10	rules	0.5	0.5	0.6667	0.5	-0.1667	-0.1667	0.6667	-1	0.4	0.5	0.5	0.6667	0.5	0.3334	0.3334	0.6667	-1	0.4
OneR	InfoGain	10	rules	0.8898	0.1102	0.914	0.8898	0.9145	0.9145	0.0855	0.8039	0.9004	0.867	0.133	0.8865	0.867	0.8754	0.8754	0.1247	0.7423	0.8709
DecisionTable	GainRatio	100*	rules	0.8978	0.1022	0.9122	0.8978	0.9034	0.9034	0.0966	0.8012	0.9005	0.8511	0.149	0.8723	0.8511	0.859	0.859	0.141	0.71	0.8548
DTNB	InfoGain	10	rules	0.9086	0.0914	0.9194	0.9086	0.9097	0.9097	0.0903	0.8183	0.9092	0.8724	0.1276	0.8865	0.8724	0.8724	0.8724	0.1276	0.7447	0.8724
NNge	InfoGain	10	rules	0.8938	0.1062	0.9158	0.8938	0.9145	0.9145	0.0855	0.808	0.9029	0.8777	0.1223	0.8936	0.8777	0.8818	0.8818	0.1182	0.7595	0.8797
ConjunctiveRule	InfoGain	10	rules	0.8844	0.1156	0.9014	0.8844	0.8921	0.8921	0.1079	0.7764	0.888	0.867	0.133	0.8865	0.867	0.8754	0.8754	0.1247	0.7423	0.8709
DecisionTable	InfoGain	10	rules	0.9005	0.0995	0.9194	0.9005	0.9161	0.9161	0.0839	0.8165	0.9076	0.8724	0.1276	0.8936	0.8724	0.8854	0.8854	0.1146	0.7577	0.8784
LWL	ReliefF	30	lazy	0.8616	0.1384	0.8763	0.8616	0.8606	0.8606	0.1394	0.7222	0.8611	0.883	0.117	0.9007	0.883	0.8917	0.8917	0.1083	0.7746	0.8871
ADTree	InfoGain	10	trees	0.9073	0.0927	0.9211	0.9073	0.9142	0.9142	0.0858	0.8214	0.9106	0.8724	0.1276	0.8865	0.8724	0.8724	0.8724	0.1276	0.7447	0.8724
BFTree	InfoGain	10	trees	0.9005	0.0995	0.9176	0.9005	0.9122	0.9122	0.0878	0.8127	0.906	0.8617	0.1383	0.8794	0.8617	0.8657	0.8657	0.1343	0.7274	0.8637
KStar	OneR	30	lazy	0.828	0.172	0.8082	0.828	0.7945	0.7945	0.2055	0.6215	0.7988	0.8564	0.1436	0.8369	0.8564	0.8215	0.8215	0.1785	0.6769	0.8281
IBk	OneR	30	lazy	0.8589	0.1411	0.8728	0.8589	0.856	0.856	0.144	0.7149	0.8574	0.8564	0.1436	0.8652	0.8564	0.8461	0.8461	0.154	0.7024	0.8507
IB1	OneR	30	lazy	0.8589	0.1411	0.8728	0.8589	0.856	0.856	0.144	0.7149	0.8574	0.8564	0.1436	0.8652	0.8564	0.8461	0.8461	0.154	0.7024	0.8507
VotedPerceptron	OneR	30	functions	0.5712	0.4288	0.7133	0.5712	0.8321	0.8321	0.1679	0.3076	0.5375	0.5426	0.4575	0.6879	0.5426	0.7005	0.7005	0.2996	0.1847	0.4961
SPegasos	OneR	30	functions	0.5094	0.4906	0.672	0.5094	0.7354	0.7354	0.2646	0.0941	0.422	0.5054	0.4947	0.6667	0.5054	0.5846	0.5846	0.4155	0.0424	0.4196
SimpleLogistic	OneR	30	functions	0.9113	0.0887	0.914	0.9113	0.8992	0.8992	0.1008	0.8104	0.9047	0.899	0.1011	0.9007	0.899	0.884	0.884	0.116	0.7828	0.8905
RBFNetwork	OneR	30	functions	0.8965	0.1035	0.9086	0.8965	0.8976	0.8976	0.1024	0.7941	0.897	0.8617	0.1383	0.8794	0.8617	0.8657	0.8657	0.1343	0.7274	0.8637
MultilayerPerceptron	OneR	30	functions	0.8992	0.1008	0.9032	0.8992	0.8875	0.8875	0.1125	0.7866	0.8928	0.8564	0.1436	0.8652	0.8564	0.8461	0.8461	0.154	0.7024	0.8507
AdaBoostM1	OneR	30	meta	0.8992	0.1008	0.9086	0.8992	0.8961	0.8961	0.1039	0.7952	0.8976	0.867	0.133	0.8865	0.867	0.8754	0.8754	0.1247	0.7423	0.8709
LWL	OneR	30	lazy	0.8992	0.1008	0.9086	0.8992	0.8961	0.8961	0.1039	0.7952	0.8976	0.867	0.133	0.8865	0.867	0.8754	0.8754	0.1247	0.7423	0.8709
Ridor	SymmerU	50	rules	0.8817	0.1183	0.9014	0.8817	0.8941	0.8941	0.1059	0.7757	0.8874	0.8564	0.1436	0.8652	0.8564	0.8461	0.8461	0.154	0.7024	0.8507
MultiBoostAB	ReliefF	30	meta	0.8817	0.1183	0.8943	0.8817	0.8807	0.8807	0.1193	0.7624	0.8812	0.8617	0.1383	0.8794	0.8617	0.8657	0.8657	0.1343	0.7274	0.8637
FT	InfoGain	50	trees	0.8616	0.1384	0.8817	0.8616	0.8699	0.8699	0.1301	0.7314	0.8655	0.8564	0.1436	0.8652	0.8564	0.8461	0.8461	0.154	0.7024	0.8507
NaiveBayesMultinomial	SymmerU	30	bayes	0.8952	0.1048	0.9122	0.8952	0.9054	0.9054	0.0946	0.8005	0.9	0.867	0.133	0.8865	0.867	0.8754	0.8754	0.1247	0.7423	0.8709
BayesNet	ReliefF	50	bayes	0.9005	0.0995	0.9068	0.9005	0.8925	0.8925	0.1075	0.793	0.8963	0.8511	0.149	0.8652	0.8511	0.8475	0.8475	0.1526	0.6985	0.8492
BayesianLogisticRegression	ReliefF	50	bayes	0.6035	0.3965	0.5269	0.6035	0.6086	0.6086	0.3914	0.212	0.5265	0.6649	0.3352	0.5674	0.6649	0.6893	0.6893	0.3107	0.3534	0.5652
BayesianLogisticRegression	OneR	50	bayes	0.2272	0.7728	0.1774	0.2272	0.1847	0.1847	0.8153	-0.5866	0.173	0.2394	0.7606	0.1844	0.2394	0.1896	0.1896	0.8104	-0.5688	0.1785
VotedPerceptron	GainRatio	50	functions	0.8696	0.1304	0.9032	0.8696	0.9111	0.9111	0.0889	0.7796	0.8858	0.8405	0.1596	0.8652	0.8405	0.8524	0.8524	0.1476	0.6927	0.8459
KStar	GainRatio	50	lazy	0.7769	0.2231	0.8118	0.7769	0.7914	0.7914	0.2086	0.5681	0.7831	0.75	0.25	0.7872	0.75	0.7621	0.7621	0.2379	0.512	0.7553
Logistic	OneR	50	functions	0.8777	0.1223	0.8835	0.8777	0.8658	0.8658	0.1342	0.7434	0.8711	0.8671	0.133	0.8723	0.8671	0.8533	0.8533	0.1468	0.7202	0.8593
NaiveBayesMultinomial	OneR	50	bayes	0.8495	0.1505	0.8297	0.8495	0.8148	0.8148	0.1852	0.6633	0.8208	0.8085	0.1915	0.8014	0.8085	0.7817	0.7817	0.2183	0.5896	0.7884
MultilayerPerceptron	GainRatio	50	functions	0.8858	0.1142	0.8996	0.8858	0.8879	0.8879	0.1121	0.7736	0.8868	0.8777	0.1224	0.8723	0.8777	0.8527	0.8527	0.1473	0.73	0.8618
SPegasos	GainRatio	50	functions	0.5	0.5	0.6667	0.5	-0.1667	-0.1667	0.6667	-1	0.4	0.5	0.5	0.6667	0.5	0.3334	0.3334	0.6667	-1	0.4
SimpleLogistic	GainRatio	50	functions	0.9046	0.0954	0.9158	0.9046	0.9057	0.9057	0.0943	0.8102	0.9051	0.8724	0.1276	0.8865	0.8724	0.8724	0.8724	0.1276	0.7447	0.8724
LibSVM	OneR	50	functions	0.5	0.5	0.6667	0.5	-0.1667	-0.1667	0.6667	-1	0.4	0.5	0.5	0.6667	0.5	0.3334	0.3334	0.6667	-1	0.4
AdaBoostM1	GainRatio	50	meta	0.8978	0.1022	0.9068	0.8978	0.8937	0.8937	0.1063	0.7915	0.8957	0.867	0.133	0.8865	0.867	0.8754	0.8754	0.1247	0.7423	0.8709
FT	SymmerU	30	trees	0.8616	0.1384	0.8799	0.8616	0.8666	0.8666	0.1334	0.7282	0.864	0.8564	0.1437	0.8794	0.8564	0.8689	0.8689	0.1311	0.7252	0.8621
MultilayerPerceptron	ReliefF	30	functions	0.8763	0.1237	0.8925	0.8763	0.8805	0.8805	0.1195	0.7569	0.8784	0.8245	0.1755	0.8511	0.8245	0.8359	0.8359	0.1641	0.6602	0.8297
Bagging	ReliefF	10	meta	0.8804	0.1196	0.8889	0.8804	0.8727	0.8727	0.1273	0.753	0.8763	0.8671	0.1329	0.8794	0.8671	0.8633	0.8633	0.1367	0.7303	0.8651
Dagging	ReliefF	10	meta	0.8737	0.1263	0.8763	0.8737	0.8573	0.8573	0.1427	0.7307	0.8642	0.8564	0.1436	0.8652	0.8564	0.8461	0.8461	0.154	0.7024	0.8507
Decorate	ReliefF	10	meta	0.8575	0.1425	0.871	0.8575	0.8538	0.8538	0.1462	0.7113	0.8556	0.883	0.117	0.8936	0.883	0.879	0.879	0.121	0.762	0.8809
ADTree	GainRatio	50	trees	0.8871	0.1129	0.8961	0.8871	0.8811	0.8811	0.1189	0.7682	0.884	0.8671	0.133	0.8723	0.8671	0.8533	0.8533	0.1468	0.7202	0.8593
FilteredClassifier	ReliefF	10	meta	0.8575	0.1425	0.871	0.8575	0.8538	0.8538	0.1462	0.7113	0.8556	0.867	0.133	0.8865	0.867	0.8754	0.8754	0.1247	0.7423	0.8709
LogitBoost	ReliefF	10	meta	0.8427	0.1573	0.8584	0.8427	0.84	0.84	0.16	0.6828	0.8414	0.8883	0.1117	0.8936	0.8883	0.8771	0.8771	0.123	0.7652	0.8822
MultiBoostAB	ReliefF	10	meta	0.8616	0.1384	0.8692	0.8616	0.8502	0.8502	0.1498	0.7116	0.8553	0.8829	0.1171	0.8865	0.8829	0.8686	0.8686	0.1314	0.7515	0.8749
ConjunctiveRule	GainRatio	10	rules	0.8844	0.1156	0.9014	0.8844	0.8921	0.8921	0.1079	0.7764	0.888	0.867	0.133	0.8865	0.867	0.8754	0.8754	0.1247	0.7423	0.8709
HyperPipes	ReliefF	10	misc	0.5457	0.4543	0.4068	0.5457	0.6143	0.6143	0.3857	0.1445	0.3722	0.5426	0.4575	0.3972	0.5426	0.6315	0.6315	0.3686	0.1496	0.3552
VFI	ReliefF	10	misc	0.5712	0.4288	0.543	0.5712	0.5643	0.5643	0.4357	0.1353	0.5378	0.5905	0.4095	0.4823	0.5905	0.623	0.623	0.377	0.2109	0.4737
HyperPipes	GainRatio	10	misc	0.7245	0.2755	0.6452	0.7245	0.7233	0.7233	0.2767	0.4477	0.6452	0.75	0.25	0.6879	0.75	0.732	0.732	0.268	0.4817	0.6867
VFI	GainRatio	10	misc	0.7648	0.2352	0.7151	0.7648	0.7389	0.7389	0.2611	0.503	0.7118	0.7554	0.2447	0.695	0.7554	0.7356	0.7356	0.2644	0.4905	0.6935
Decorate	GainRatio	10	meta	0.9005	0.0995	0.9176	0.9005	0.9122	0.9122	0.0878	0.8127	0.906	0.8617	0.1383	0.8794	0.8617	0.8657	0.8657	0.1343	0.7274	0.8637
END	GainRatio	10	meta	0.9099	0.0901	0.9211	0.9099	0.9122	0.9122	0.0878	0.8221	0.911	0.867	0.133	0.8865	0.867	0.8754	0.8754	0.1247	0.7423	0.8709
Bagging	GainRatio	10	meta	0.9032	0.0968	0.9176	0.9032	0.9101	0.9101	0.0899	0.8133	0.9065	0.8936	0.1064	0.9007	0.8936	0.8858	0.8858	0.1143	0.7793	0.8895
Dagging	GainRatio	10	meta	0.8065	0.1935	0.862	0.8065	0.8832	0.8832	0.1168	0.6853	0.8297	0.7554	0.2447	0.8156	0.7554	0.8165	0.8165	0.1835	0.5685	0.7732
MultiBoostAB	GainRatio	10	meta	0.8978	0.1022	0.9122	0.8978	0.9034	0.9034	0.0966	0.8012	0.9005	0.8724	0.1276	0.8865	0.8724	0.8724	0.8724	0.1276	0.7447	0.8724
MultiClassClassifier	GainRatio	10	meta	0.9113	0.0887	0.9176	0.9113	0.905	0.905	0.095	0.8162	0.908	0.8617	0.1383	0.8723	0.8617	0.8545	0.8545	0.1456	0.7161	0.8579
FilteredClassifier	GainRatio	10	meta	0.9019	0.0981	0.9176	0.9019	0.9111	0.9111	0.0889	0.8129	0.9062	0.8724	0.1276	0.8865	0.8724	0.8724	0.8724	0.1276	0.7447	0.8724
LogitBoost	GainRatio	10	meta	0.8965	0.1035	0.9086	0.8965	0.8976	0.8976	0.1024	0.7941	0.897	0.867	0.133	0.8865	0.867	0.8754	0.8754	0.1247	0.7423	0.8709
LibSVM	ReliefF	50	functions	0.5	0.5	0.6667	0.5	-0.1667	-0.1667	0.6667	-1	0.4	0.5	0.5	0.6667	0.5	0.3334	0.3334	0.6667	-1	0.4
J48	GainRatio	30	trees	0.8938	0.1062	0.9068	0.8938	0.896	0.896	0.104	0.7898	0.8949	0.8564	0.1436	0.8723	0.8564	0.8564	0.8564	0.1436	0.7128	0.8564
IB1	GainRatio	30	lazy	0.8387	0.1613	0.8566	0.8387	0.8387	0.8387	0.1613	0.6774	0.8387	0.8617	0.1383	0.8794	0.8617	0.8657	0.8657	0.1343	0.7274	0.8637
Logistic	InfoGain	30	functions	0.8858	0.1142	0.8853	0.8858	0.8666	0.8666	0.1334	0.7521	0.8745	0.8936	0.1064	0.8936	0.8936	0.8758	0.8758	0.1243	0.7692	0.8833
NaiveBayes	InfoGain	30	bayes	0.8925	0.1075	0.8853	0.8925	0.8664	0.8664	0.1336	0.7584	0.8758	0.8777	0.1224	0.8723	0.8777	0.8527	0.8527	0.1473	0.73	0.8618
BayesNet	InfoGain	30	bayes	0.9126	0.0874	0.9211	0.9126	0.9105	0.9105	0.0895	0.8231	0.9115	0.883	0.117	0.8936	0.883	0.879	0.879	0.121	0.762	0.8809
BayesianLogisticRegression	InfoGain	30	bayes	0.1949	0.8051	0.1595	0.1949	0.1721	0.1721	0.8279	-0.6326	0.1581	0.2341	0.766	0.1844	0.2341	0.1947	0.1947	0.8054	-0.57	0.1803
DMNBtext	InfoGain	30	bayes	0.8427	0.1573	0.8835	0.8427	0.8925	0.8925	0.1075	0.7336	0.8609	0.7606	0.2394	0.8156	0.7606	0.8104	0.8104	0.1896	0.5688	0.7765
ComplementNaiveBayes	InfoGain	30	bayes	0.7728	0.2272	0.7222	0.7728	0.7462	0.7462	0.2538	0.5184	0.7191	0.7659	0.2341	0.7234	0.7659	0.7379	0.7379	0.2622	0.503	0.7188
NaiveBayesMultinomialUpdateable	InfoGain	30	bayes	0.793	0.207	0.7581	0.793	0.7605	0.7605	0.2395	0.5526	0.7517	0.7873	0.2128	0.7801	0.7873	0.7611	0.7611	0.2389	0.5477	0.7666
NaiveBayesMultinomial	InfoGain	30	bayes	0.7728	0.2272	0.7222	0.7728	0.7462	0.7462	0.2538	0.5184	0.7191	0.7659	0.2341	0.7234	0.7659	0.7379	0.7379	0.2622	0.503	0.7188
LibSVM	InfoGain	30	functions	0.5215	0.4785	0.681	0.5215	0.8382	0.8382	0.1618	0.1706	0.4447	0.5107	0.4894	0.6738	0.5107	0.8357	0.8357	0.1643	0.1195	0.4226
Ridor	GainRatio	50	rules	0.879	0.121	0.9014	0.879	0.8963	0.8963	0.1037	0.7751	0.8867	0.899	0.1011	0.9007	0.899	0.884	0.884	0.116	0.7828	0.8905
RandomTree	ReliefF	10	trees	0.797	0.203	0.8118	0.797	0.7877	0.7877	0.2123	0.5847	0.7918	0.8404	0.1596	0.8582	0.8404	0.8404	0.8404	0.1596	0.6809	0.8404
REPTree	ReliefF	10	trees	0.8589	0.1411	0.8763	0.8589	0.8618	0.8618	0.1382	0.7207	0.8603	0.8617	0.1383	0.8865	0.8617	0.8793	0.8793	0.1208	0.7407	0.8695
AdaBoostM1	SymmerU	30	meta	0.8992	0.1008	0.9086	0.8992	0.8961	0.8961	0.1039	0.7952	0.8976	0.867	0.133	0.8865	0.867	0.8754	0.8754	0.1247	0.7423	0.8709
LWL	SymmerU	30	lazy	0.8992	0.1008	0.9086	0.8992	0.8961	0.8961	0.1039	0.7952	0.8976	0.867	0.133	0.8865	0.867	0.8754	0.8754	0.1247	0.7423	0.8709
SPegasos	SymmerU	30	functions	0.5067	0.4933	0.6703	0.5067	0.7098	0.7098	0.2902	0.0751	0.4164	0.5054	0.4947	0.6667	0.5054	0.5846	0.5846	0.4155	0.0424	0.4196
SimpleLogistic	SymmerU	30	functions	0.9086	0.0914	0.9122	0.9086	0.8975	0.8975	0.1025	0.8061	0.9026	0.899	0.1011	0.9007	0.899	0.884	0.884	0.116	0.7828	0.8905
RBFNetwork	SymmerU	30	functions	0.8978	0.1022	0.9104	0.8978	0.9	0.9	0.1	0.7979	0.8989	0.8883	0.1117	0.9007	0.8883	0.8883	0.8883	0.1117	0.7766	0.8883
MultilayerPerceptron	SymmerU	30	functions	0.9032	0.0968	0.9122	0.9032	0.9001	0.9001	0.0999	0.8033	0.9016	0.8883	0.1117	0.8865	0.8883	0.8679	0.8679	0.1322	0.7558	0.8761
KStar	SymmerU	30	lazy	0.8011	0.1989	0.7975	0.8011	0.7765	0.7765	0.2235	0.5771	0.7833	0.8298	0.1703	0.8156	0.8298	0.7986	0.7986	0.2015	0.6276	0.805
IBk	SymmerU	30	lazy	0.8616	0.1384	0.8763	0.8616	0.8606	0.8606	0.1394	0.7222	0.8611	0.8351	0.1649	0.844	0.8351	0.8226	0.8226	0.1775	0.6575	0.828
IB1	SymmerU	30	lazy	0.8616	0.1384	0.8763	0.8616	0.8606	0.8606	0.1394	0.7222	0.8611	0.8351	0.1649	0.844	0.8351	0.8226	0.8226	0.1775	0.6575	0.828
VotedPerceptron	SymmerU	30	functions	0.7917	0.2083	0.8477	0.7917	0.8608	0.8608	0.1392	0.6488	0.8127	0.7978	0.2022	0.8511	0.7978	0.8618	0.8618	0.1383	0.6565	0.8181
RBFNetwork	SymmerU	100*	functions	0.879	0.121	0.8835	0.879	0.8655	0.8655	0.1345	0.7444	0.8714	0.8511	0.1489	0.8794	0.8511	0.873	0.873	0.127	0.7237	0.8605
MultilayerPerceptron	SymmerU	100*	functions	0.8911	0.1089	0.905	0.8911	0.8944	0.8944	0.1056	0.7855	0.8927	0.8724	0.1276	0.8511	0.8724	0.8359	0.8359	0.1642	0.7073	0.843
SPegasos	SymmerU	100*	functions	0.5148	0.4852	0.6756	0.5148	0.7652	0.7652	0.2348	0.1252	0.433	0.5107	0.4894	0.6738	0.5107	0.8357	0.8357	0.1643	0.1195	0.4226
SimpleLogistic	SymmerU	100*	functions	0.9019	0.0981	0.9104	0.9019	0.8977	0.8977	0.1023	0.7996	0.8997	0.8777	0.1223	0.8936	0.8777	0.8818	0.8818	0.1182	0.7595	0.8797
IB1	SymmerU	100*	lazy	0.8535	0.1465	0.8728	0.8535	0.8584	0.8584	0.1416	0.7119	0.8559	0.8245	0.1755	0.8511	0.8245	0.8359	0.8359	0.1641	0.6602	0.8297
VotedPerceptron	SymmerU	100*	functions	0.8481	0.1519	0.8817	0.8481	0.8811	0.8811	0.1189	0.7285	0.8613	0.8245	0.1756	0.8582	0.8245	0.8497	0.8497	0.1503	0.6736	0.8348
KStar	SymmerU	100*	lazy	0.7661	0.2339	0.7706	0.7661	0.7469	0.7469	0.2531	0.5126	0.7527	0.8298	0.1702	0.8227	0.8298	0.8027	0.8027	0.1973	0.6319	0.8104
IBk	SymmerU	100*	lazy	0.8535	0.1465	0.8728	0.8535	0.8584	0.8584	0.1416	0.7119	0.8559	0.8245	0.1755	0.8511	0.8245	0.8359	0.8359	0.1641	0.6602	0.8297
AdaBoostM1	SymmerU	100*	meta	0.9005	0.0995	0.9104	0.9005	0.8984	0.8984	0.1016	0.799	0.8995	0.867	0.133	0.8865	0.867	0.8754	0.8754	0.1247	0.7423	0.8709
LWL	SymmerU	100*	lazy	0.8992	0.1008	0.9086	0.8992	0.8961	0.8961	0.1039	0.7952	0.8976	0.867	0.133	0.8865	0.867	0.8754	0.8754	0.1247	0.7423	0.8709
J48	SymmerU	50	trees	0.8737	0.1263	0.8889	0.8737	0.8757	0.8757	0.1243	0.7494	0.8747	0.8298	0.1702	0.8511	0.8298	0.8334	0.8334	0.1666	0.6632	0.8316
SimpleLogistic	GainRatio	30	functions	0.9113	0.0887	0.9211	0.9113	0.9113	0.9113	0.0887	0.8226	0.9113	0.8989	0.1011	0.9078	0.8989	0.8949	0.8949	0.1052	0.7938	0.8969
ConjunctiveRule	OneR	30	rules	0.8844	0.1156	0.9014	0.8844	0.8921	0.8921	0.1079	0.7764	0.888	0.867	0.133	0.8865	0.867	0.8754	0.8754	0.1247	0.7423	0.8709
BayesianLogisticRegression	SymmerU	50	bayes	0.4382	0.5618	0.3566	0.4382	0.4235	0.4235	0.5765	-0.1375	0.3503	0.4043	0.5958	0.305	0.4043	0.3494	0.3494	0.6506	-0.2402	0.286
LWL	OneR	10	lazy	0.8992	0.1008	0.9086	0.8992	0.8961	0.8961	0.1039	0.7952	0.8976	0.8617	0.1383	0.8794	0.8617	0.8657	0.8657	0.1343	0.7274	0.8637
END	SymmerU	100*	meta	0.8642	0.1358	0.8799	0.8642	0.8652	0.8652	0.1348	0.7295	0.8647	0.8351	0.1649	0.8511	0.8351	0.8317	0.8317	0.1684	0.6668	0.8333
DTNB	OneR	30	rules	0.9059	0.0941	0.9194	0.9059	0.9116	0.9116	0.0884	0.8175	0.9087	0.8777	0.1223	0.8865	0.8777	0.8701	0.8701	0.1299	0.7477	0.8737
J48	InfoGain	10	trees	0.9046	0.0954	0.9194	0.9046	0.9126	0.9126	0.0874	0.8172	0.9084	0.8724	0.1276	0.8936	0.8724	0.8854	0.8854	0.1146	0.7577	0.8784
PART	OneR	30	rules	0.8831	0.1169	0.8961	0.8831	0.8831	0.8831	0.1169	0.7661	0.8831	0.8511	0.1489	0.8794	0.8511	0.873	0.873	0.127	0.7237	0.8605
BFTree	ReliefF	10	trees	0.8481	0.1519	0.8692	0.8481	0.8551	0.8551	0.1449	0.7031	0.8514	0.8671	0.1329	0.8794	0.8671	0.8633	0.8633	0.1367	0.7303	0.8651
LMT	SymmerU	30	trees	0.9086	0.0914	0.9122	0.9086	0.8975	0.8975	0.1025	0.8061	0.9026	0.899	0.1011	0.9007	0.899	0.884	0.884	0.116	0.7828	0.8905
OneR	OneR	30	rules	0.8898	0.1102	0.914	0.8898	0.9145	0.9145	0.0855	0.8039	0.9004	0.867	0.133	0.8865	0.867	0.8754	0.8754	0.1247	0.7423	0.8709
DTNB	OneR	50	rules	0.9005	0.0995	0.9104	0.9005	0.8984	0.8984	0.1016	0.799	0.8995	0.883	0.117	0.8936	0.883	0.879	0.879	0.121	0.762	0.8809
NNge	OneR	50	rules	0.8763	0.1237	0.8996	0.8763	0.8948	0.8948	0.1052	0.7709	0.8845	0.8564	0.1437	0.8794	0.8564	0.8689	0.8689	0.1311	0.7252	0.8621
ConjunctiveRule	OneR	50	rules	0.8844	0.1156	0.9014	0.8844	0.8921	0.8921	0.1079	0.7764	0.888	0.867	0.133	0.8865	0.867	0.8754	0.8754	0.1247	0.7423	0.8709
DecisionTable	OneR	50	rules	0.9005	0.0995	0.9158	0.9005	0.9085	0.9085	0.0915	0.809	0.9043	0.8617	0.1383	0.8794	0.8617	0.8657	0.8657	0.1343	0.7274	0.8637
Ridor	OneR	50	rules	0.875	0.125	0.8961	0.875	0.8883	0.8883	0.1117	0.7632	0.8811	0.8777	0.1223	0.8865	0.8777	0.8701	0.8701	0.1299	0.7477	0.8737
ZeroR	OneR	50	rules	0.5	0.5	0.6667	0.5	-0.1667	-0.1667	0.6667	-1	0.4	0.5	0.5	0.6667	0.5	0.3334	0.3334	0.6667	-1	0.4
OneR	OneR	50	rules	0.8898	0.1102	0.914	0.8898	0.9145	0.9145	0.0855	0.8039	0.9004	0.867	0.133	0.8865	0.867	0.8754	0.8754	0.1247	0.7423	0.8709
PART	OneR	50	rules	0.875	0.125	0.8925	0.875	0.8813	0.8813	0.1187	0.7563	0.878	0.8458	0.1543	0.8652	0.8458	0.8495	0.8495	0.1505	0.6953	0.8476
ADTree	OneR	50	trees	0.8858	0.1142	0.9014	0.8858	0.8912	0.8912	0.1088	0.7769	0.8884	0.8777	0.1223	0.8865	0.8777	0.8701	0.8701	0.1299	0.7477	0.8737
BFTree	OneR	50	trees	0.8925	0.1075	0.914	0.8925	0.9117	0.9117	0.0883	0.8039	0.901	0.8139	0.1862	0.8369	0.8139	0.8173	0.8173	0.1827	0.6311	0.8155
Dagging	OneR	30	meta	0.9073	0.0927	0.905	0.9073	0.8878	0.8878	0.1122	0.7949	0.8959	0.8883	0.1117	0.8936	0.8883	0.8771	0.8771	0.123	0.7652	0.8822
BayesNet	GainRatio	10	bayes	0.9059	0.0941	0.9211	0.9059	0.9152	0.9152	0.0848	0.8211	0.9103	0.8617	0.1383	0.8794	0.8617	0.8657	0.8657	0.1343	0.7274	0.8637
ADTree	OneR	100*	trees	0.8952	0.1048	0.905	0.8952	0.8921	0.8921	0.1079	0.7872	0.8936	0.8777	0.1223	0.8865	0.8777	0.8701	0.8701	0.1299	0.7477	0.8737
SPegasos	OneR	10	functions	0.5995	0.4005	0.7294	0.5995	0.8108	0.8108	0.1892	0.3516	0.5852	0.6489	0.3511	0.7589	0.6489	0.8121	0.8121	0.1879	0.4312	0.6564
Logistic	GainRatio	10	functions	0.9113	0.0887	0.9176	0.9113	0.905	0.905	0.095	0.8162	0.908	0.8617	0.1383	0.8723	0.8617	0.8545	0.8545	0.1456	0.7161	0.8579
ComplementNaiveBayes	SymmerU	50	bayes	0.9019	0.0981	0.9122	0.9019	0.9008	0.9008	0.0992	0.8027	0.9013	0.867	0.133	0.8865	0.867	0.8754	0.8754	0.1247	0.7423	0.8709
NaiveBayes	GainRatio	10	bayes	0.8777	0.1223	0.8961	0.8777	0.8864	0.8864	0.1136	0.764	0.8818	0.8564	0.1436	0.8723	0.8564	0.8564	0.8564	0.1436	0.7128	0.8564
NaiveBayesMultinomialUpdateable	GainRatio	10	bayes	0.8333	0.1667	0.8746	0.8333	0.8801	0.8801	0.1199	0.7119	0.8505	0.8086	0.1915	0.8511	0.8086	0.8483	0.8483	0.1518	0.6555	0.8232
MultiBoostAB	ReliefF	50	meta	0.8723	0.1277	0.8889	0.8723	0.8764	0.8764	0.1236	0.7487	0.8743	0.8724	0.1276	0.8865	0.8724	0.8724	0.8724	0.1276	0.7447	0.8724
NaiveBayesMultinomial	GainRatio	10	bayes	0.8898	0.1102	0.9086	0.8898	0.9024	0.9024	0.0976	0.7921	0.8956	0.8245	0.1756	0.8582	0.8245	0.8497	0.8497	0.1503	0.6736	0.8348
DMNBtext	GainRatio	10	bayes	0.8024	0.1976	0.8459	0.8024	0.8419	0.8419	0.1581	0.6431	0.8169	0.7713	0.2287	0.8085	0.7713	0.7883	0.7883	0.2118	0.5593	0.7784
IB1	OneR	10	lazy	0.8212	0.1788	0.8387	0.8212	0.8179	0.8179	0.1821	0.6391	0.8195	0.8192	0.1809	0.844	0.8192	0.8264	0.8264	0.1736	0.6455	0.8226
LWL	SymmerU	10	lazy	0.8992	0.1008	0.9086	0.8992	0.8961	0.8961	0.1039	0.7952	0.8976	0.867	0.133	0.8865	0.867	0.8754	0.8754	0.1247	0.7423	0.8709
AdaBoostM1	SymmerU	10	meta	0.8992	0.1008	0.9086	0.8992	0.8961	0.8961	0.1039	0.7952	0.8976	0.867	0.133	0.8865	0.867	0.8754	0.8754	0.1247	0.7423	0.8709
IBk	SymmerU	10	lazy	0.8468	0.1532	0.8638	0.8468	0.8468	0.8468	0.1532	0.6935	0.8468	0.8245	0.1755	0.844	0.8245	0.8245	0.8245	0.1755	0.6489	0.8245
MultiClassClassifier	OneR	30	meta	0.8831	0.1169	0.8889	0.8831	0.8718	0.8718	0.1282	0.7548	0.8769	0.8883	0.1117	0.8936	0.8883	0.8771	0.8771	0.123	0.7652	0.8822
VotedPerceptron	SymmerU	10	functions	0.6371	0.3629	0.7527	0.6371	0.8175	0.8175	0.1825	0.4172	0.6402	0.6596	0.3404	0.766	0.6596	0.8185	0.8185	0.1816	0.4508	0.6701
IB1	SymmerU	10	lazy	0.8468	0.1532	0.8638	0.8468	0.8468	0.8468	0.1532	0.6935	0.8468	0.8245	0.1755	0.844	0.8245	0.8245	0.8245	0.1755	0.6489	0.8245
SimpleLogistic	SymmerU	10	functions	0.8992	0.1008	0.905	0.8992	0.8902	0.8902	0.1098	0.7894	0.8944	0.883	0.117	0.8936	0.883	0.879	0.879	0.121	0.762	0.8809
SPegasos	SymmerU	10	functions	0.5968	0.4032	0.7276	0.5968	0.809	0.809	0.191	0.3458	0.5811	0.633	0.367	0.7518	0.633	0.8305	0.8305	0.1696	0.4192	0.6339
MultilayerPerceptron	SymmerU	10	functions	0.9194	0.0806	0.9301	0.9194	0.9228	0.9228	0.0772	0.8422	0.9211	0.8777	0.1223	0.8865	0.8777	0.8701	0.8701	0.1299	0.7477	0.8737
RBFNetwork	SymmerU	10	functions	0.8911	0.1089	0.9068	0.8911	0.8978	0.8978	0.1022	0.7889	0.8943	0.8883	0.1117	0.9007	0.8883	0.8883	0.8883	0.1117	0.7766	0.8883
ADTree	GainRatio	100*	trees	0.871	0.129	0.8889	0.871	0.8772	0.8772	0.1228	0.7482	0.874	0.8671	0.133	0.8723	0.8671	0.8533	0.8533	0.1468	0.7202	0.8593
LibSVM	GainRatio	100*	functions	0.5	0.5	0.6667	0.5	-0.1667	-0.1667	0.6667	-1	0.4	0.5	0.5	0.6667	0.5	0.3334	0.3334	0.6667	-1	0.4
REPTree	InfoGain	10	trees	0.8992	0.1008	0.9158	0.8992	0.9096	0.9096	0.0904	0.8087	0.9041	0.867	0.133	0.8865	0.867	0.8754	0.8754	0.1247	0.7423	0.8709
FilteredClassifier	OneR	30	meta	0.8858	0.1142	0.9014	0.8858	0.8912	0.8912	0.1088	0.7769	0.8884	0.867	0.133	0.8865	0.867	0.8754	0.8754	0.1247	0.7423	0.8709
RandomForest	InfoGain	10	trees	0.9086	0.0914	0.9158	0.9086	0.9033	0.9033	0.0967	0.8119	0.9059	0.8777	0.1223	0.8865	0.8777	0.8701	0.8701	0.1299	0.7477	0.8737
BayesNet	GainRatio	100*	bayes	0.8911	0.1089	0.9086	0.8911	0.9013	0.9013	0.0987	0.7924	0.8959	0.8245	0.1756	0.8582	0.8245	0.8497	0.8497	0.1503	0.6736	0.8348
NaiveBayes	GainRatio	100*	bayes	0.8548	0.1452	0.8871	0.8548	0.887	0.887	0.113	0.7411	0.8678	0.8139	0.1861	0.8582	0.8139	0.8604	0.8604	0.1397	0.6725	0.8305
LADTree	InfoGain	10	trees	0.9019	0.0981	0.9176	0.9019	0.9111	0.9111	0.0889	0.8129	0.9062	0.8724	0.1276	0.8936	0.8724	0.8854	0.8854	0.1146	0.7577	0.8784
NaiveBayesMultinomial	GainRatio	100*	bayes	0.8616	0.1384	0.8835	0.8616	0.8732	0.8732	0.1268	0.7347	0.8669	0.8458	0.1543	0.8723	0.8458	0.8625	0.8625	0.1375	0.708	0.8532
RandomForest	OneR	10	trees	0.9046	0.0954	0.9176	0.9046	0.9091	0.9091	0.0909	0.8136	0.9068	0.8617	0.1383	0.8794	0.8617	0.8657	0.8657	0.1343	0.7274	0.8637
FT	InfoGain	10	trees	0.8992	0.1008	0.9176	0.8992	0.9134	0.9134	0.0866	0.8125	0.9057	0.8777	0.1223	0.8936	0.8777	0.8818	0.8818	0.1182	0.7595	0.8797
DecisionStump	InfoGain	10	trees	0.8992	0.1008	0.9086	0.8992	0.8961	0.8961	0.1039	0.7952	0.8976	0.867	0.133	0.8865	0.867	0.8754	0.8754	0.1247	0.7423	0.8709
NBTree	OneR	10	trees	0.9032	0.0968	0.9194	0.9032	0.9137	0.9137	0.0863	0.8169	0.9081	0.8724	0.1276	0.8865	0.8724	0.8724	0.8724	0.1276	0.7447	0.8724
NaiveBayesMultinomial	ReliefF	30	bayes	0.8858	0.1142	0.8817	0.8858	0.8626	0.8626	0.1374	0.748	0.8714	0.8511	0.1489	0.8511	0.8511	0.8301	0.8301	0.1699	0.6809	0.8381
NaiveBayesMultinomialUpdateable	ReliefF	30	bayes	0.8858	0.1142	0.8835	0.8858	0.8645	0.8645	0.1355	0.75	0.8729	0.8617	0.1383	0.8652	0.8617	0.8453	0.8453	0.1548	0.7068	0.8522
ComplementNaiveBayes	ReliefF	30	bayes	0.8844	0.1156	0.8799	0.8844	0.8607	0.8607	0.1393	0.7447	0.8696	0.8511	0.1489	0.8511	0.8511	0.8301	0.8301	0.1699	0.6809	0.8381
DMNBtext	ReliefF	30	bayes	0.4973	0.5027	0.6595	0.4973	0.4577	0.4577	0.5423	-0.0213	0.4073	0.5213	0.4788	0.6738	0.5213	0.6383	0.6383	0.3618	0.1085	0.4577
BayesianLogisticRegression	ReliefF	30	bayes	0.6358	0.3642	0.5842	0.6358	0.6267	0.6267	0.3733	0.2623	0.5829	0.7341	0.266	0.6809	0.7341	0.7138	0.7138	0.2863	0.4473	0.6786
BayesNet	ReliefF	30	bayes	0.8952	0.1048	0.8996	0.8952	0.8836	0.8836	0.1164	0.7787	0.8888	0.8564	0.1436	0.8723	0.8564	0.8564	0.8564	0.1436	0.7128	0.8564
NaiveBayes	ReliefF	30	bayes	0.8978	0.1022	0.8889	0.8978	0.8702	0.8702	0.1298	0.7676	0.88	0.8457	0.1543	0.8369	0.8457	0.8173	0.8173	0.1827	0.6624	0.8256
Logistic	ReliefF	30	functions	0.8925	0.1075	0.9014	0.8925	0.8874	0.8874	0.1126	0.7799	0.8898	0.8511	0.149	0.8652	0.8511	0.8475	0.8475	0.1526	0.6985	0.8492
ZeroR	InfoGain	50	rules	0.5	0.5	0.6667	0.5	-0.1667	-0.1667	0.6667	-1	0.4	0.5	0.5	0.6667	0.5	0.3334	0.3334	0.6667	-1	0.4
ComplementNaiveBayes	SymmerU	10	bayes	0.8656	0.1344	0.8674	0.8656	0.8475	0.8475	0.1525	0.7128	0.8548	0.8298	0.1702	0.8298	0.8298	0.808	0.808	0.192	0.6374	0.8157
DMNBtext	SymmerU	10	bayes	0.5	0.5	0.6667	0.5	-0.1667	-0.1667	0.6667	-1	0.4	0.5	0.5	0.6667	0.5	0.3334	0.3334	0.6667	-1	0.4
NaiveBayesMultinomial	SymmerU	10	bayes	0.8683	0.1317	0.871	0.8683	0.8514	0.8514	0.1486	0.7195	0.8584	0.8298	0.1702	0.8298	0.8298	0.808	0.808	0.192	0.6374	0.8157
NaiveBayesMultinomialUpdateable	SymmerU	10	bayes	0.7608	0.2392	0.8154	0.7608	0.8098	0.8098	0.1902	0.5684	0.7764	0.7288	0.2713	0.7872	0.7288	0.7724	0.7724	0.2276	0.4992	0.7421
NaiveBayes	SymmerU	10	bayes	0.8965	0.1035	0.8871	0.8965	0.8684	0.8684	0.1316	0.7644	0.8782	0.8723	0.1277	0.8723	0.8723	0.8527	0.8527	0.1473	0.7248	0.8606
Logistic	SymmerU	10	functions	0.9059	0.0941	0.9122	0.9059	0.8987	0.8987	0.1013	0.8046	0.9021	0.883	0.117	0.8936	0.883	0.879	0.879	0.121	0.762	0.8809
BayesianLogisticRegression	SymmerU	10	bayes	0.1546	0.8454	0.1434	0.1546	0.1631	0.1631	0.8369	-0.6822	0.1431	0.1277	0.8723	0.1277	0.1277	0.1473	0.1473	0.8527	-0.7248	0.1261
BayesNet	SymmerU	10	bayes	0.9099	0.0901	0.9211	0.9099	0.9122	0.9122	0.0878	0.8221	0.911	0.8883	0.1117	0.9007	0.8883	0.8883	0.8883	0.1117	0.7766	0.8883
LibSVM	SymmerU	10	functions	0.6304	0.3696	0.7509	0.6304	0.837	0.837	0.163	0.4193	0.63	0.6489	0.3511	0.7589	0.6489	0.8121	0.8121	0.1879	0.4312	0.6564
RandomTree	GainRatio	50	trees	0.8495	0.1505	0.862	0.8495	0.8432	0.8432	0.1568	0.6927	0.8462	0.8139	0.1862	0.8369	0.8139	0.8173	0.8173	0.1827	0.6311	0.8155
REPTree	GainRatio	50	trees	0.9046	0.0954	0.9211	0.9046	0.9164	0.9164	0.0836	0.8208	0.91	0.8352	0.1649	0.8582	0.8352	0.8427	0.8427	0.1573	0.6778	0.8387
IB1	ReliefF	10	lazy	0.8038	0.1962	0.8262	0.8038	0.8046	0.8046	0.1954	0.6083	0.8042	0.75	0.25	0.7943	0.75	0.7734	0.7734	0.2266	0.5229	0.759
END	ReliefF	100*	meta	0.836	0.164	0.8548	0.836	0.8369	0.8369	0.1631	0.673	0.8365	0.7766	0.2234	0.8014	0.7766	0.7766	0.7766	0.2234	0.5532	0.7766
Decorate	ReliefF	100*	meta	0.8884	0.1116	0.9032	0.8884	0.8928	0.8928	0.1072	0.7812	0.8905	0.867	0.133	0.8865	0.867	0.8754	0.8754	0.1247	0.7423	0.8709
Dagging	ReliefF	100*	meta	0.9005	0.0995	0.9176	0.9005	0.9122	0.9122	0.0878	0.8127	0.906	0.8511	0.149	0.8723	0.8511	0.859	0.859	0.141	0.71	0.8548
FT	GainRatio	50	trees	0.8468	0.1532	0.8746	0.8468	0.8662	0.8662	0.1338	0.7127	0.8552	0.8777	0.1224	0.8794	0.8777	0.8606	0.8606	0.1395	0.738	0.8677
MultiClassClassifier	ReliefF	100*	meta	0.797	0.203	0.8208	0.797	0.7987	0.7987	0.2013	0.5957	0.7978	0.7926	0.2075	0.8085	0.7926	0.784	0.784	0.2159	0.5766	0.7878
MultiBoostAB	ReliefF	100*	meta	0.8804	0.1196	0.8943	0.8804	0.8814	0.8814	0.1186	0.7618	0.8809	0.883	0.117	0.8936	0.883	0.879	0.879	0.121	0.762	0.8809
LogitBoost	ReliefF	100*	meta	0.871	0.129	0.8889	0.871	0.8772	0.8772	0.1228	0.7482	0.874	0.8405	0.1596	0.8652	0.8405	0.8524	0.8524	0.1476	0.6927	0.8459
FilteredClassifier	ReliefF	100*	meta	0.8562	0.1438	0.8763	0.8562	0.8633	0.8633	0.1367	0.7194	0.8595	0.8511	0.149	0.8652	0.8511	0.8475	0.8475	0.1526	0.6985	0.8492
AdaBoostM1	ReliefF	10	meta	0.8454	0.1546	0.8584	0.8454	0.8393	0.8393	0.1607	0.6847	0.8422	0.8883	0.1117	0.8865	0.8883	0.8679	0.8679	0.1322	0.7558	0.8761
LWL	ReliefF	10	lazy	0.8562	0.1438	0.862	0.8562	0.842	0.842	0.158	0.698	0.8481	0.8777	0.1224	0.8794	0.8777	0.8606	0.8606	0.1395	0.738	0.8677
LWL	InfoGain	50	lazy	0.8992	0.1008	0.9086	0.8992	0.8961	0.8961	0.1039	0.7952	0.8976	0.867	0.133	0.8865	0.867	0.8754	0.8754	0.1247	0.7423	0.8709
AdaBoostM1	InfoGain	50	meta	0.8992	0.1008	0.9086	0.8992	0.8961	0.8961	0.1039	0.7952	0.8976	0.867	0.133	0.8865	0.867	0.8754	0.8754	0.1247	0.7423	0.8709
RBFNetwork	ReliefF	10	functions	0.8602	0.1398	0.8728	0.8602	0.8556	0.8556	0.1444	0.7158	0.8578	0.867	0.133	0.8865	0.867	0.8754	0.8754	0.1247	0.7423	0.8709
KStar	InfoGain	50	lazy	0.7796	0.2204	0.7545	0.7796	0.7488	0.7488	0.2512	0.5275	0.7458	0.8085	0.1915	0.7872	0.8085	0.776	0.776	0.224	0.5835	0.7778
SPegasos	ReliefF	10	functions	0.543	0.457	0.6935	0.543	0.7906	0.7906	0.2094	0.2236	0.4891	0.5373	0.4628	0.6879	0.5373	0.7419	0.7419	0.2581	0.1898	0.4813
IB1	InfoGain	50	lazy	0.8522	0.1478	0.8674	0.8522	0.8503	0.8503	0.1497	0.7024	0.8512	0.8511	0.1489	0.8794	0.8511	0.873	0.873	0.127	0.7237	0.8605
SimpleLogistic	InfoGain	50	functions	0.8871	0.1129	0.8925	0.8871	0.8758	0.8758	0.1242	0.7628	0.8809	0.8883	0.1117	0.8936	0.8883	0.8771	0.8771	0.123	0.7652	0.8822
SPegasos	InfoGain	50	functions	0.5	0.5	0.6667	0.5	-0.1667	-0.1667	0.6667	-1	0.4	0.5107	0.4894	0.6738	0.5107	0.8357	0.8357	0.1643	0.1195	0.4226
MultilayerPerceptron	InfoGain	50	functions	0.8898	0.1102	0.8978	0.8898	0.8829	0.8829	0.1171	0.7726	0.8861	0.867	0.133	0.8652	0.867	0.8452	0.8452	0.1548	0.7118	0.8535
RBFNetwork	InfoGain	50	functions	0.9046	0.0954	0.914	0.9046	0.9024	0.9024	0.0976	0.807	0.9035	0.8511	0.149	0.8723	0.8511	0.859	0.859	0.141	0.71	0.8548
LibSVM	InfoGain	10	functions	0.7016	0.2984	0.7957	0.7016	0.8504	0.8504	0.1496	0.5316	0.7215	0.7181	0.2819	0.8014	0.7181	0.8323	0.8323	0.1678	0.5384	0.7389
NaiveBayesMultinomial	InfoGain	10	bayes	0.7903	0.2097	0.7545	0.7903	0.7582	0.7582	0.2418	0.5476	0.7484	0.7978	0.2022	0.766	0.7978	0.7648	0.7648	0.2352	0.5617	0.759
NaiveBayesMultinomialUpdateable	InfoGain	10	bayes	0.5605	0.4395	0.6416	0.5605	0.5744	0.5744	0.4256	0.1342	0.5602	0.5532	0.4468	0.6241	0.5532	0.56	0.56	0.4399	0.113	0.5538
ComplementNaiveBayes	InfoGain	10	bayes	0.8024	0.1976	0.7616	0.8024	0.7693	0.7693	0.2307	0.5708	0.7565	0.7819	0.2181	0.7447	0.7819	0.7509	0.7509	0.2491	0.5319	0.7389
DMNBtext	InfoGain	10	bayes	0.7204	0.2796	0.8065	0.7204	0.8497	0.8497	0.1503	0.5553	0.7425	0.6862	0.3138	0.7801	0.6862	0.8142	0.8142	0.1859	0.4837	0.7026
BayesianLogisticRegression	InfoGain	10	bayes	0.0995	0.9005	0.1022	0.0995	0.12	0.12	0.88	-0.7802	0.1006	0.1171	0.8829	0.1135	0.1171	0.1314	0.1314	0.8686	-0.7515	0.1128
BayesNet	InfoGain	10	bayes	0.9086	0.0914	0.9211	0.9086	0.9131	0.9131	0.0869	0.8217	0.9108	0.8777	0.1223	0.8865	0.8777	0.8701	0.8701	0.1299	0.7477	0.8737
NaiveBayes	InfoGain	10	bayes	0.8831	0.1169	0.8674	0.8831	0.8496	0.8496	0.1504	0.7319	0.8587	0.8777	0.1223	0.8652	0.8777	0.8466	0.8466	0.1534	0.7236	0.8559
Logistic	InfoGain	10	functions	0.9073	0.0927	0.9104	0.9073	0.8953	0.8953	0.1047	0.8025	0.9007	0.883	0.117	0.8936	0.883	0.879	0.879	0.121	0.762	0.8809
PART	InfoGain	100*	rules	0.8763	0.1237	0.8996	0.8763	0.8948	0.8948	0.1052	0.7709	0.8845	0.8671	0.1329	0.8794	0.8671	0.8633	0.8633	0.1367	0.7303	0.8651
OneR	InfoGain	100*	rules	0.8898	0.1102	0.914	0.8898	0.9145	0.9145	0.0855	0.8039	0.9004	0.867	0.133	0.8865	0.867	0.8754	0.8754	0.1247	0.7423	0.8709
ZeroR	InfoGain	100*	rules	0.5	0.5	0.6667	0.5	-0.1667	-0.1667	0.6667	-1	0.4	0.5	0.5	0.6667	0.5	0.3334	0.3334	0.6667	-1	0.4
Ridor	InfoGain	100*	rules	0.8871	0.1129	0.9104	0.8871	0.9088	0.9088	0.0912	0.7956	0.8966	0.8458	0.1543	0.8723	0.8458	0.8625	0.8625	0.1375	0.708	0.8532
DecisionTable	InfoGain	100*	rules	0.8844	0.1156	0.9032	0.8844	0.8956	0.8956	0.1044	0.7799	0.8896	0.8724	0.1276	0.8936	0.8724	0.8854	0.8854	0.1146	0.7577	0.8784
ConjunctiveRule	InfoGain	100*	rules	0.8844	0.1156	0.9014	0.8844	0.8921	0.8921	0.1079	0.7764	0.888	0.867	0.133	0.8865	0.867	0.8754	0.8754	0.1247	0.7423	0.8709
NNge	InfoGain	100*	rules	0.8858	0.1142	0.9086	0.8858	0.906	0.906	0.094	0.7915	0.8947	0.8458	0.1543	0.8723	0.8458	0.8625	0.8625	0.1375	0.708	0.8532
DTNB	InfoGain	100*	rules	0.9005	0.0995	0.9122	0.9005	0.9016	0.9016	0.0984	0.8022	0.9011	0.867	0.133	0.8865	0.867	0.8754	0.8754	0.1247	0.7423	0.8709
DTNB	InfoGain	50	rules	0.8978	0.1022	0.9086	0.8978	0.8968	0.8968	0.1032	0.7946	0.8973	0.8458	0.1543	0.8652	0.8458	0.8495	0.8495	0.1505	0.6953	0.8476
BFTree	InfoGain	100*	trees	0.879	0.121	0.8907	0.879	0.876	0.876	0.124	0.7551	0.8775	0.8564	0.1437	0.8794	0.8564	0.8689	0.8689	0.1311	0.7252	0.8621
ADTree	InfoGain	100*	trees	0.8952	0.1048	0.9086	0.8952	0.8984	0.8984	0.1016	0.7936	0.8968	0.8777	0.1223	0.8865	0.8777	0.8701	0.8701	0.1299	0.7477	0.8737
ADTree	ReliefF	50	trees	0.8696	0.1304	0.8781	0.8696	0.8605	0.8605	0.1395	0.73	0.8647	0.8458	0.1543	0.8865	0.8458	0.897	0.897	0.1031	0.7409	0.8644
VFI	OneR	10	misc	0.7728	0.2272	0.724	0.7728	0.7456	0.7456	0.2544	0.5177	0.7206	0.7287	0.2713	0.6525	0.7287	0.7242	0.7242	0.2759	0.4529	0.6524
HyperPipes	OneR	10	misc	0.7406	0.2594	0.6667	0.7406	0.7325	0.7325	0.2675	0.473	0.6665	0.7287	0.2713	0.6525	0.7287	0.7242	0.7242	0.2759	0.4529	0.6524
MultiClassClassifier	OneR	10	meta	0.9005	0.0995	0.9068	0.9005	0.8925	0.8925	0.1075	0.793	0.8963	0.8883	0.1117	0.9007	0.8883	0.8883	0.8883	0.1117	0.7766	0.8883
MultiBoostAB	OneR	10	meta	0.9005	0.0995	0.9122	0.9005	0.9016	0.9016	0.0984	0.8022	0.9011	0.8617	0.1383	0.8794	0.8617	0.8657	0.8657	0.1343	0.7274	0.8637
LogitBoost	OneR	10	meta	0.8938	0.1062	0.9086	0.8938	0.8993	0.8993	0.1007	0.7931	0.8965	0.867	0.133	0.8865	0.867	0.8754	0.8754	0.1247	0.7423	0.8709
FilteredClassifier	OneR	10	meta	0.8884	0.1116	0.905	0.8884	0.8962	0.8962	0.1038	0.7846	0.8921	0.867	0.133	0.8865	0.867	0.8754	0.8754	0.1247	0.7423	0.8709
END	OneR	10	meta	0.9086	0.0914	0.9247	0.9086	0.9205	0.9205	0.0795	0.829	0.9141	0.867	0.133	0.8865	0.867	0.8754	0.8754	0.1247	0.7423	0.8709
Decorate	OneR	10	meta	0.8992	0.1008	0.9122	0.8992	0.9025	0.9025	0.0975	0.8017	0.9008	0.8777	0.1223	0.8936	0.8777	0.8818	0.8818	0.1182	0.7595	0.8797
Dagging	OneR	10	meta	0.9032	0.0968	0.8961	0.9032	0.8777	0.8777	0.1223	0.7805	0.8872	0.8777	0.1223	0.8865	0.8777	0.8701	0.8701	0.1299	0.7477	0.8737
Bagging	OneR	10	meta	0.9073	0.0927	0.9211	0.9073	0.9142	0.9142	0.0858	0.8214	0.9106	0.8724	0.1276	0.8865	0.8724	0.8724	0.8724	0.1276	0.7447	0.8724
NaiveBayesMultinomialUpdateable	GainRatio	30	bayes	0.879	0.121	0.9032	0.879	0.9003	0.9003	0.0997	0.779	0.8883	0.8458	0.1543	0.8723	0.8458	0.8625	0.8625	0.1375	0.708	0.8532
FT	SymmerU	10	trees	0.9046	0.0954	0.9229	0.9046	0.9203	0.9203	0.0797	0.8247	0.9117	0.8777	0.1223	0.8936	0.8777	0.8818	0.8818	0.1182	0.7595	0.8797
ComplementNaiveBayes	SymmerU	100*	bayes	0.8938	0.1062	0.9032	0.8938	0.8897	0.8897	0.1103	0.7835	0.8917	0.8564	0.1437	0.8794	0.8564	0.8689	0.8689	0.1311	0.7252	0.8621
SimpleLogistic	InfoGain	100*	functions	0.9005	0.0995	0.9068	0.9005	0.8925	0.8925	0.1075	0.793	0.8963	0.8724	0.1276	0.8865	0.8724	0.8724	0.8724	0.1276	0.7447	0.8724
VFI	SymmerU	100*	misc	0.8602	0.1398	0.8835	0.8602	0.8742	0.8742	0.1258	0.7343	0.8665	0.8511	0.149	0.8723	0.8511	0.859	0.859	0.141	0.71	0.8548
DecisionStump	SymmerU	50	trees	0.8992	0.1008	0.9086	0.8992	0.8961	0.8961	0.1039	0.7952	0.8976	0.867	0.133	0.8865	0.867	0.8754	0.8754	0.1247	0.7423	0.8709
DMNBtext	OneR	10	bayes	0.8078	0.1922	0.8584	0.8078	0.8692	0.8692	0.1308	0.6742	0.8279	0.7447	0.2553	0.8085	0.7447	0.8099	0.8099	0.1901	0.5508	0.7626
SimpleLogistic	ReliefF	10	functions	0.8763	0.1237	0.8853	0.8763	0.8688	0.8688	0.1312	0.7451	0.8723	0.8777	0.1223	0.8865	0.8777	0.8701	0.8701	0.1299	0.7477	0.8737
LibSVM	SymmerU	30	functions	0.5	0.5	0.6667	0.5	-0.1667	-0.1667	0.6667	-1	0.4	0.5	0.5	0.6667	0.5	0.3334	0.3334	0.6667	-1	0.4
LibSVM	SymmerU	50	functions	0.5	0.5	0.6667	0.5	-0.1667	-0.1667	0.6667	-1	0.4	0.5	0.5	0.6667	0.5	0.3334	0.3334	0.6667	-1	0.4
LADTree	SymmerU	30	trees	0.8925	0.1075	0.9086	0.8925	0.9003	0.9003	0.0997	0.7927	0.8962	0.867	0.133	0.8865	0.867	0.8754	0.8754	0.1247	0.7423	0.8709
DecisionStump	SymmerU	30	trees	0.8992	0.1008	0.9086	0.8992	0.8961	0.8961	0.1039	0.7952	0.8976	0.867	0.133	0.8865	0.867	0.8754	0.8754	0.1247	0.7423	0.8709
IB1	ReliefF	30	lazy	0.8562	0.1438	0.8781	0.8562	0.8666	0.8666	0.1334	0.7227	0.861	0.867	0.133	0.8865	0.867	0.8754	0.8754	0.1247	0.7423	0.8709
IBk	ReliefF	30	lazy	0.8562	0.1438	0.8781	0.8562	0.8666	0.8666	0.1334	0.7227	0.861	0.867	0.133	0.8865	0.867	0.8754	0.8754	0.1247	0.7423	0.8709
J48graft	SymmerU	30	trees	0.9113	0.0887	0.9229	0.9113	0.9147	0.9147	0.0853	0.826	0.913	0.8511	0.149	0.8723	0.8511	0.859	0.859	0.141	0.71	0.8548
KStar	ReliefF	50	lazy	0.8804	0.1196	0.8996	0.8804	0.8915	0.8915	0.1085	0.7718	0.8855	0.8458	0.1543	0.8723	0.8458	0.8625	0.8625	0.1375	0.708	0.8532
RBFNetwork	ReliefF	30	functions	0.8763	0.1237	0.8889	0.8763	0.8744	0.8744	0.1256	0.7507	0.8753	0.8458	0.1543	0.8582	0.8458	0.8389	0.8389	0.1612	0.6846	0.8421
SimpleLogistic	ReliefF	30	functions	0.8911	0.1089	0.9014	0.8911	0.8881	0.8881	0.1119	0.7792	0.8896	0.8511	0.149	0.8652	0.8511	0.8475	0.8475	0.1526	0.6985	0.8492
Dagging	SymmerU	100*	meta	0.914	0.086	0.9211	0.914	0.9097	0.9097	0.0903	0.8236	0.9118	0.867	0.133	0.8865	0.867	0.8754	0.8754	0.1247	0.7423	0.8709
RandomTree	SymmerU	30	trees	0.8401	0.1599	0.8566	0.8401	0.8383	0.8383	0.1617	0.6783	0.8391	0.8458	0.1543	0.8582	0.8458	0.8389	0.8389	0.1612	0.6846	0.8421
NNge	GainRatio	100*	rules	0.8911	0.1089	0.9032	0.8911	0.8911	0.8911	0.1089	0.7823	0.8911	0.8458	0.1543	0.8652	0.8458	0.8495	0.8495	0.1505	0.6953	0.8476
AdaBoostM1	ReliefF	50	meta	0.8468	0.1532	0.8656	0.8468	0.8496	0.8496	0.1504	0.6964	0.8482	0.8511	0.1489	0.8794	0.8511	0.873	0.873	0.127	0.7237	0.8605
LWL	ReliefF	50	lazy	0.8589	0.1411	0.8746	0.8589	0.8589	0.8589	0.1411	0.7177	0.8589	0.867	0.133	0.8865	0.867	0.8754	0.8754	0.1247	0.7423	0.8709
Ridor	GainRatio	100*	rules	0.8763	0.1237	0.8889	0.8763	0.8744	0.8744	0.1256	0.7507	0.8753	0.8724	0.1276	0.8865	0.8724	0.8724	0.8724	0.1276	0.7447	0.8724
ZeroR	GainRatio	100*	rules	0.5	0.5	0.6667	0.5	-0.1667	-0.1667	0.6667	-1	0.4	0.5	0.5	0.6667	0.5	0.3334	0.3334	0.6667	-1	0.4
OneR	GainRatio	100*	rules	0.8898	0.1102	0.914	0.8898	0.9145	0.9145	0.0855	0.8039	0.9004	0.867	0.133	0.8865	0.867	0.8754	0.8754	0.1247	0.7423	0.8709
PART	GainRatio	100*	rules	0.8642	0.1358	0.8781	0.8642	0.8623	0.8623	0.1377	0.7266	0.8633	0.8351	0.1649	0.8511	0.8351	0.8317	0.8317	0.1684	0.6668	0.8333
NaiveBayesMultinomialUpdateable	ReliefF	50	bayes	0.8898	0.1102	0.8871	0.8898	0.8684	0.8684	0.1316	0.7578	0.8768	0.8511	0.149	0.8582	0.8511	0.8379	0.8379	0.1621	0.6888	0.8436
NaiveBayesMultinomial	ReliefF	50	bayes	0.8858	0.1142	0.8799	0.8858	0.8607	0.8607	0.1393	0.746	0.8699	0.8511	0.1489	0.8511	0.8511	0.8301	0.8301	0.1699	0.6809	0.8381
DMNBtext	ReliefF	50	bayes	0.4919	0.5081	0.6541	0.4919	0.3871	0.3871	0.6129	-0.0604	0.4004	0.5054	0.4947	0.6667	0.5054	0.5846	0.5846	0.4155	0.0424	0.4196
ComplementNaiveBayes	ReliefF	50	bayes	0.8858	0.1142	0.8799	0.8858	0.8607	0.8607	0.1393	0.746	0.8699	0.8511	0.1489	0.8511	0.8511	0.8301	0.8301	0.1699	0.6809	0.8381
REPTree	GainRatio	30	trees	0.9059	0.0941	0.9229	0.9059	0.919	0.919	0.081	0.8248	0.912	0.8671	0.133	0.8723	0.8671	0.8533	0.8533	0.1468	0.7202	0.8593
RandomTree	GainRatio	30	trees	0.8575	0.1425	0.8674	0.8575	0.8487	0.8487	0.1513	0.7061	0.8527	0.8351	0.1649	0.8511	0.8351	0.8317	0.8317	0.1684	0.6668	0.8333
Logistic	ReliefF	50	functions	0.8656	0.1344	0.8817	0.8656	0.8676	0.8676	0.1324	0.7332	0.8666	0.8245	0.1755	0.844	0.8245	0.8245	0.8245	0.1755	0.6489	0.8245
NaiveBayes	ReliefF	50	bayes	0.8911	0.1089	0.8799	0.8911	0.8612	0.8612	0.1388	0.7517	0.871	0.8404	0.1596	0.8298	0.8404	0.8109	0.8109	0.1891	0.6506	0.8186
LMT	GainRatio	30	trees	0.918	0.082	0.9265	0.918	0.9169	0.9169	0.0831	0.8349	0.9174	0.8989	0.1011	0.9078	0.8989	0.8949	0.8949	0.1052	0.7938	0.8969
FilteredClassifier	SymmerU	100*	meta	0.8911	0.1089	0.9032	0.8911	0.8911	0.8911	0.1089	0.7823	0.8911	0.8777	0.1223	0.8865	0.8777	0.8701	0.8701	0.1299	0.7477	0.8737
RandomForest	GainRatio	30	trees	0.9113	0.0887	0.9211	0.9113	0.9113	0.9113	0.0887	0.8226	0.9113	0.8671	0.1329	0.8794	0.8671	0.8633	0.8633	0.1367	0.7303	0.8651
NBTree	GainRatio	30	trees	0.8952	0.1048	0.9158	0.8952	0.9132	0.9132	0.0868	0.8081	0.9032	0.8564	0.1436	0.8723	0.8564	0.8564	0.8564	0.1436	0.7128	0.8564
FT	GainRatio	30	trees	0.8535	0.1465	0.8871	0.8535	0.8885	0.8885	0.1115	0.7412	0.8674	0.8564	0.1436	0.8582	0.8564	0.8376	0.8376	0.1624	0.6937	0.8451
MultiBoostAB	OneR	100*	meta	0.8992	0.1008	0.9122	0.8992	0.9025	0.9025	0.0975	0.8017	0.9008	0.8829	0.1171	0.8865	0.8829	0.8686	0.8686	0.1314	0.7515	0.8749
J48graft	GainRatio	30	trees	0.9059	0.0941	0.9194	0.9059	0.9116	0.9116	0.0884	0.8175	0.9087	0.8511	0.149	0.8723	0.8511	0.859	0.859	0.141	0.71	0.8548
BayesianLogisticRegression	SymmerU	30	bayes	0.2957	0.7043	0.2366	0.2957	0.2607	0.2607	0.7393	-0.4422	0.2318	0.3457	0.6543	0.2624	0.3457	0.2846	0.2846	0.7154	-0.3646	0.2487
MultiClassClassifier	OneR	100*	meta	0.793	0.207	0.8065	0.793	0.7819	0.7819	0.2181	0.5748	0.7866	0.8405	0.1596	0.8369	0.8405	0.8159	0.8159	0.1841	0.6559	0.8241
MultiBoostAB	SymmerU	100*	meta	0.8965	0.1035	0.9086	0.8965	0.8976	0.8976	0.1024	0.7941	0.897	0.8617	0.1383	0.8794	0.8617	0.8657	0.8657	0.1343	0.7274	0.8637
SPegasos	GainRatio	100*	functions	0.4987	0.5013	0.6649	0.4987	0.333	0.333	0.667	-0.03	0.3994	0.5	0.5	0.6667	0.5	0.3334	0.3334	0.6667	-1	0.4
VotedPerceptron	ReliefF	10	functions	0.7648	0.2352	0.819	0.7648	0.8146	0.8146	0.1854	0.5772	0.7808	0.7607	0.2394	0.8085	0.7607	0.7942	0.7942	0.2058	0.5538	0.7727
Logistic	SymmerU	50	functions	0.8642	0.1358	0.8746	0.8642	0.8569	0.8569	0.1431	0.7211	0.8603	0.8617	0.1383	0.8652	0.8617	0.8453	0.8453	0.1548	0.7068	0.8522
KStar	InfoGain	100*	lazy	0.7876	0.2124	0.7545	0.7876	0.7557	0.7557	0.2443	0.5424	0.7478	0.8032	0.1969	0.7801	0.8032	0.7706	0.7706	0.2294	0.5729	0.7712
VFI	GainRatio	100*	misc	0.836	0.164	0.8746	0.836	0.8768	0.8768	0.1232	0.7116	0.8515	0.7926	0.2074	0.8298	0.7926	0.8153	0.8153	0.1848	0.6074	0.8018
J48graft	OneR	100*	trees	0.9086	0.0914	0.9194	0.9086	0.9097	0.9097	0.0903	0.8183	0.9092	0.8405	0.1596	0.8652	0.8405	0.8524	0.8524	0.1476	0.6927	0.8459
BFTree	GainRatio	100*	trees	0.8763	0.1237	0.8978	0.8763	0.891	0.891	0.109	0.7672	0.883	0.8298	0.1703	0.844	0.8298	0.8232	0.8232	0.1768	0.653	0.8263
LMT	SymmerU	50	trees	0.8978	0.1022	0.9104	0.8978	0.9	0.9	0.1	0.7979	0.8989	0.8617	0.1383	0.8794	0.8617	0.8657	0.8657	0.1343	0.7274	0.8637
DTNB	SymmerU	50	rules	0.9005	0.0995	0.9122	0.9005	0.9016	0.9016	0.0984	0.8022	0.9011	0.8724	0.1276	0.8865	0.8724	0.8724	0.8724	0.1276	0.7447	0.8724
FT	OneR	100*	trees	0.8817	0.1183	0.8925	0.8817	0.8777	0.8777	0.1223	0.7595	0.8797	0.8298	0.1702	0.8582	0.8298	0.8458	0.8458	0.1542	0.6754	0.8368
KStar	SymmerU	10	lazy	0.8535	0.1465	0.862	0.8535	0.8424	0.8424	0.1576	0.6958	0.8473	0.8404	0.1596	0.8511	0.8404	0.8306	0.8306	0.1695	0.6709	0.835
NBTree	OneR	100*	trees	0.8777	0.1223	0.8907	0.8777	0.8767	0.8767	0.1233	0.7544	0.8772	0.8777	0.1223	0.8936	0.8777	0.8818	0.8818	0.1182	0.7595	0.8797
IBk	InfoGain	100*	lazy	0.8562	0.1438	0.8674	0.8562	0.849	0.849	0.151	0.7051	0.8524	0.8724	0.1276	0.8936	0.8724	0.8854	0.8854	0.1146	0.7577	0.8784
HyperPipes	ReliefF	50	misc	0.6909	0.3091	0.6165	0.6909	0.6889	0.6889	0.3111	0.3797	0.6165	0.7128	0.2873	0.6312	0.7128	0.7151	0.7151	0.2849	0.4279	0.6312
HyperPipes	OneR	100*	misc	0.871	0.129	0.8746	0.871	0.8554	0.8554	0.1446	0.7262	0.862	0.8298	0.1702	0.8227	0.8298	0.8027	0.8027	0.1973	0.6319	0.8104
LMT	OneR	100*	trees	0.8965	0.1035	0.905	0.8965	0.8914	0.8914	0.1086	0.7879	0.8938	0.883	0.117	0.8936	0.883	0.879	0.879	0.121	0.762	0.8809
LADTree	SymmerU	50	trees	0.8938	0.1062	0.9068	0.8938	0.896	0.896	0.104	0.7898	0.8949	0.8511	0.149	0.8582	0.8511	0.8379	0.8379	0.1621	0.6888	0.8436
VFI	OneR	100*	misc	0.8616	0.1384	0.8799	0.8616	0.8666	0.8666	0.1334	0.7282	0.864	0.8405	0.1596	0.8652	0.8405	0.8524	0.8524	0.1476	0.6927	0.8459
Dagging	GainRatio	100*	meta	0.8898	0.1102	0.9122	0.8898	0.9102	0.9102	0.0898	0.7998	0.8988	0.8511	0.1489	0.8794	0.8511	0.873	0.873	0.127	0.7237	0.8605
MultiClassClassifier	ReliefF	50	meta	0.8656	0.1344	0.8817	0.8656	0.8676	0.8676	0.1324	0.7332	0.8666	0.8245	0.1755	0.844	0.8245	0.8245	0.8245	0.1755	0.6489	0.8245
LADTree	GainRatio	100*	trees	0.8858	0.1142	0.9014	0.8858	0.8912	0.8912	0.1088	0.7769	0.8884	0.8458	0.1543	0.8652	0.8458	0.8495	0.8495	0.1505	0.6953	0.8476
RandomTree	OneR	100*	trees	0.8414	0.1586	0.8638	0.8414	0.8492	0.8492	0.1508	0.6906	0.8451	0.8139	0.1862	0.8369	0.8139	0.8173	0.8173	0.1827	0.6311	0.8155
NaiveBayes	GainRatio	30	bayes	0.828	0.172	0.8746	0.828	0.8878	0.8878	0.1122	0.7132	0.8483	0.8085	0.1915	0.8582	0.8085	0.8674	0.8674	0.1326	0.6733	0.8281
REPTree	OneR	100*	trees	0.9032	0.0968	0.9211	0.9032	0.9176	0.9176	0.0824	0.8207	0.9098	0.8564	0.1436	0.8723	0.8564	0.8564	0.8564	0.1436	0.7128	0.8564
Ridor	SymmerU	100*	rules	0.871	0.129	0.8925	0.871	0.8842	0.8842	0.1158	0.755	0.877	0.8511	0.149	0.8652	0.8511	0.8475	0.8475	0.1526	0.6985	0.8492
J48graft	SymmerU	50	trees	0.8884	0.1116	0.905	0.8884	0.8962	0.8962	0.1038	0.7846	0.8921	0.8405	0.1596	0.8652	0.8405	0.8524	0.8524	0.1476	0.6927	0.8459
BayesianLogisticRegression	GainRatio	30	bayes	0.4691	0.5309	0.3763	0.4691	0.4588	0.4588	0.5412	-0.0714	0.3669	0.4469	0.5532	0.3404	0.4469	0.4134	0.4134	0.5866	-0.1357	0.3208
FilteredClassifier	GainRatio	100*	meta	0.8898	0.1102	0.905	0.8898	0.8952	0.8952	0.1048	0.785	0.8924	0.8085	0.1915	0.8369	0.8085	0.8194	0.8194	0.1807	0.6278	0.8135
Bagging	SymmerU	30	meta	0.9099	0.0901	0.9247	0.9099	0.9194	0.9194	0.0806	0.8292	0.9144	0.883	0.117	0.8936	0.883	0.879	0.879	0.121	0.762	0.8809
BayesNet	GainRatio	30	bayes	0.8965	0.1035	0.914	0.8965	0.9081	0.9081	0.0919	0.8045	0.9019	0.8564	0.1437	0.8794	0.8564	0.8689	0.8689	0.1311	0.7252	0.8621
MultiClassClassifier	GainRatio	100*	meta	0.8065	0.1935	0.8315	0.8065	0.8116	0.8116	0.1884	0.6181	0.8089	0.8617	0.1383	0.8794	0.8617	0.8657	0.8657	0.1343	0.7274	0.8637
LibSVM	GainRatio	50	functions	0.5	0.5	0.6667	0.5	-0.1667	-0.1667	0.6667	-1	0.4	0.5	0.5	0.6667	0.5	0.3334	0.3334	0.6667	-1	0.4
MultiBoostAB	GainRatio	100*	meta	0.8978	0.1022	0.9086	0.8978	0.8968	0.8968	0.1032	0.7946	0.8973	0.8617	0.1383	0.8794	0.8617	0.8657	0.8657	0.1343	0.7274	0.8637
Ridor	ReliefF	10	rules	0.8589	0.1411	0.8746	0.8589	0.8589	0.8589	0.1411	0.7177	0.8589	0.8032	0.1968	0.844	0.8032	0.8367	0.8367	0.1633	0.639	0.816
LibSVM	ReliefF	100*	functions	0.5	0.5	0.6667	0.5	-0.1667	-0.1667	0.6667	-1	0.4	0.5	0.5	0.6667	0.5	0.3334	0.3334	0.6667	-1	0.4
AdaBoostM1	GainRatio	10	meta	0.8992	0.1008	0.9086	0.8992	0.8961	0.8961	0.1039	0.7952	0.8976	0.867	0.133	0.8865	0.867	0.8754	0.8754	0.1247	0.7423	0.8709
LWL	GainRatio	10	lazy	0.8992	0.1008	0.9086	0.8992	0.8961	0.8961	0.1039	0.7952	0.8976	0.8617	0.1383	0.8794	0.8617	0.8657	0.8657	0.1343	0.7274	0.8637
KStar	GainRatio	10	lazy	0.8535	0.1465	0.8566	0.8535	0.836	0.836	0.164	0.6892	0.8431	0.8458	0.1543	0.8511	0.8458	0.8301	0.8301	0.17	0.6756	0.8366
IBk	GainRatio	10	lazy	0.8508	0.1492	0.862	0.8508	0.8429	0.8429	0.1571	0.6937	0.8466	0.8192	0.1809	0.8511	0.8192	0.8391	0.8391	0.1609	0.658	0.8276
NaiveBayesMultinomial	ReliefF	100*	bayes	0.8858	0.1142	0.8799	0.8858	0.8607	0.8607	0.1393	0.746	0.8699	0.8564	0.1437	0.8511	0.8564	0.8308	0.8308	0.1693	0.6867	0.8394
NaiveBayesMultinomialUpdateable	ReliefF	100*	bayes	0.875	0.125	0.8746	0.875	0.855	0.855	0.145	0.7298	0.863	0.8405	0.1596	0.844	0.8405	0.8225	0.8225	0.1775	0.6627	0.8296
SPegasos	GainRatio	10	functions	0.5954	0.4046	0.7276	0.5954	0.8187	0.8187	0.1813	0.3488	0.5783	0.633	0.367	0.7518	0.633	0.8305	0.8305	0.1696	0.4192	0.6339
SimpleLogistic	GainRatio	10	functions	0.9059	0.0941	0.914	0.9059	0.9017	0.9017	0.0983	0.8076	0.9037	0.8724	0.1276	0.8794	0.8724	0.8616	0.8616	0.1385	0.7338	0.8664
RBFNetwork	GainRatio	10	functions	0.8656	0.1344	0.8961	0.8656	0.8972	0.8972	0.1028	0.7622	0.8785	0.8777	0.1224	0.8794	0.8777	0.8606	0.8606	0.1395	0.738	0.8677
MultilayerPerceptron	GainRatio	10	functions	0.9005	0.0995	0.9122	0.9005	0.9016	0.9016	0.0984	0.8022	0.9011	0.8777	0.1224	0.8794	0.8777	0.8606	0.8606	0.1395	0.738	0.8677
DMNBtext	GainRatio	50	bayes	0.832	0.168	0.8728	0.832	0.8769	0.8769	0.1231	0.7075	0.8486	0.8351	0.1649	0.8652	0.8351	0.8561	0.8561	0.144	0.6908	0.8441
RandomTree	InfoGain	30	trees	0.8495	0.1505	0.8638	0.8495	0.8458	0.8458	0.1542	0.6953	0.8476	0.8139	0.1862	0.8298	0.8139	0.8076	0.8076	0.1924	0.6214	0.8105
REPTree	InfoGain	30	trees	0.8992	0.1008	0.9176	0.8992	0.9134	0.9134	0.0866	0.8125	0.9057	0.867	0.133	0.8865	0.867	0.8754	0.8754	0.1247	0.7423	0.8709
NBTree	InfoGain	30	trees	0.9073	0.0927	0.9194	0.9073	0.9106	0.9106	0.0894	0.8179	0.9089	0.8724	0.1276	0.8794	0.8724	0.8616	0.8616	0.1385	0.7338	0.8664
RandomForest	InfoGain	30	trees	0.9099	0.0901	0.9176	0.9099	0.9057	0.9057	0.0943	0.8156	0.9077	0.8883	0.1117	0.8936	0.8883	0.8771	0.8771	0.123	0.7652	0.8822
LADTree	InfoGain	30	trees	0.8884	0.1116	0.9068	0.8884	0.8998	0.8998	0.1002	0.7881	0.8937	0.8352	0.1649	0.8582	0.8352	0.8427	0.8427	0.1573	0.6778	0.8387
LMT	InfoGain	30	trees	0.8938	0.1062	0.8978	0.8938	0.8814	0.8814	0.1186	0.7751	0.887	0.899	0.1011	0.9007	0.899	0.884	0.884	0.116	0.7828	0.8905
J48	InfoGain	30	trees	0.8723	0.1277	0.8799	0.8723	0.8622	0.8622	0.1378	0.7345	0.8668	0.8298	0.1702	0.8582	0.8298	0.8458	0.8458	0.1542	0.6754	0.8368
J48graft	InfoGain	30	trees	0.8777	0.1223	0.8853	0.8777	0.8683	0.8683	0.1317	0.7459	0.8726	0.8351	0.1649	0.8652	0.8351	0.8561	0.8561	0.144	0.6908	0.8441
DecisionStump	InfoGain	30	trees	0.8992	0.1008	0.9086	0.8992	0.8961	0.8961	0.1039	0.7952	0.8976	0.867	0.133	0.8865	0.867	0.8754	0.8754	0.1247	0.7423	0.8709
FT	InfoGain	30	trees	0.8817	0.1183	0.8943	0.8817	0.8807	0.8807	0.1193	0.7624	0.8812	0.883	0.117	0.8936	0.883	0.879	0.879	0.121	0.762	0.8809
MultiBoostAB	SymmerU	30	meta	0.9005	0.0995	0.9122	0.9005	0.9016	0.9016	0.0984	0.8022	0.9011	0.8724	0.1276	0.8865	0.8724	0.8724	0.8724	0.1276	0.7447	0.8724
MultiClassClassifier	SymmerU	30	meta	0.8777	0.1223	0.8871	0.8777	0.871	0.871	0.129	0.7486	0.8741	0.8829	0.1171	0.8794	0.8829	0.8602	0.8602	0.1399	0.7428	0.8689
LogitBoost	OneR	30	meta	0.8978	0.1022	0.9086	0.8978	0.8968	0.8968	0.1032	0.7946	0.8973	0.8564	0.1437	0.8794	0.8564	0.8689	0.8689	0.1311	0.7252	0.8621
SimpleLogistic	GainRatio	100*	functions	0.8898	0.1102	0.905	0.8898	0.8952	0.8952	0.1048	0.785	0.8924	0.867	0.133	0.8865	0.867	0.8754	0.8754	0.1247	0.7423	0.8709
LogitBoost	SymmerU	30	meta	0.8938	0.1062	0.9068	0.8938	0.896	0.896	0.104	0.7898	0.8949	0.867	0.133	0.8865	0.867	0.8754	0.8754	0.1247	0.7423	0.8709
BayesNet	GainRatio	50	bayes	0.8858	0.1142	0.905	0.8858	0.8982	0.8982	0.1018	0.7839	0.8915	0.8351	0.1649	0.8652	0.8351	0.8561	0.8561	0.144	0.6908	0.8441
VotedPerceptron	GainRatio	100*	functions	0.8562	0.1438	0.8889	0.8562	0.89	0.89	0.11	0.7454	0.8697	0.8564	0.1437	0.8794	0.8564	0.8689	0.8689	0.1311	0.7252	0.8621
ADTree	SymmerU	100*	trees	0.9032	0.0968	0.9158	0.9032	0.9066	0.9066	0.0934	0.8098	0.9049	0.883	0.117	0.8936	0.883	0.879	0.879	0.121	0.762	0.8809
END	SymmerU	30	meta	0.9126	0.0874	0.9229	0.9126	0.9138	0.9138	0.0862	0.8264	0.9132	0.8404	0.1596	0.8582	0.8404	0.8404	0.8404	0.1596	0.6809	0.8404
NNge	OneR	100*	rules	0.8696	0.1304	0.8996	0.8696	0.9016	0.9016	0.0984	0.7706	0.8827	0.8511	0.1489	0.8794	0.8511	0.873	0.873	0.127	0.7237	0.8605
DTNB	OneR	100*	rules	0.9005	0.0995	0.914	0.9005	0.905	0.905	0.095	0.8055	0.9027	0.8458	0.1543	0.8652	0.8458	0.8495	0.8495	0.1505	0.6953	0.8476
DecisionTable	OneR	100*	rules	0.9019	0.0981	0.9158	0.9019	0.9075	0.9075	0.0925	0.8094	0.9046	0.8617	0.1383	0.8865	0.8617	0.8793	0.8793	0.1208	0.7407	0.8695
ConjunctiveRule	OneR	100*	rules	0.8844	0.1156	0.9014	0.8844	0.8921	0.8921	0.1079	0.7764	0.888	0.867	0.133	0.8865	0.867	0.8754	0.8754	0.1247	0.7423	0.8709
LWL	SymmerU	50	lazy	0.8992	0.1008	0.9086	0.8992	0.8961	0.8961	0.1039	0.7952	0.8976	0.867	0.133	0.8865	0.867	0.8754	0.8754	0.1247	0.7423	0.8709
Ridor	OneR	100*	rules	0.8911	0.1089	0.9068	0.8911	0.8978	0.8978	0.1022	0.7889	0.8943	0.8564	0.1436	0.8652	0.8564	0.8461	0.8461	0.154	0.7024	0.8507
PART	OneR	100*	rules	0.8548	0.1452	0.871	0.8548	0.8548	0.8548	0.1452	0.7097	0.8548	0.8298	0.1703	0.844	0.8298	0.8232	0.8232	0.1768	0.653	0.8263
OneR	OneR	100*	rules	0.8898	0.1102	0.914	0.8898	0.9145	0.9145	0.0855	0.8039	0.9004	0.867	0.133	0.8865	0.867	0.8754	0.8754	0.1247	0.7423	0.8709
VotedPerceptron	SymmerU	50	functions	0.8306	0.1694	0.8728	0.8306	0.8787	0.8787	0.1213	0.7077	0.8481	0.8511	0.149	0.8865	0.8511	0.8899	0.8899	0.1101	0.7399	0.8662
IB1	SymmerU	50	lazy	0.8589	0.1411	0.8781	0.8589	0.8649	0.8649	0.1351	0.7238	0.8618	0.8085	0.1915	0.844	0.8085	0.8325	0.8325	0.1676	0.6405	0.8183
IBk	SymmerU	50	lazy	0.8589	0.1411	0.8781	0.8589	0.8649	0.8649	0.1351	0.7238	0.8618	0.8085	0.1915	0.844	0.8085	0.8325	0.8325	0.1676	0.6405	0.8183
Dagging	SymmerU	30	meta	0.9073	0.0927	0.9104	0.9073	0.8953	0.8953	0.1047	0.8025	0.9007	0.883	0.117	0.8936	0.883	0.879	0.879	0.121	0.762	0.8809
MultilayerPerceptron	SymmerU	50	functions	0.9019	0.0981	0.9122	0.9019	0.9008	0.9008	0.0992	0.8027	0.9013	0.867	0.133	0.8652	0.867	0.8452	0.8452	0.1548	0.7118	0.8535
RBFNetwork	SymmerU	50	functions	0.8763	0.1237	0.8943	0.8763	0.8838	0.8838	0.1162	0.7601	0.8799	0.8564	0.1437	0.8794	0.8564	0.8689	0.8689	0.1311	0.7252	0.8621
SimpleLogistic	SymmerU	50	functions	0.9005	0.0995	0.9104	0.9005	0.8984	0.8984	0.1016	0.799	0.8995	0.8617	0.1383	0.8794	0.8617	0.8657	0.8657	0.1343	0.7274	0.8637
SPegasos	SymmerU	50	functions	0.5067	0.4933	0.6703	0.5067	0.7098	0.7098	0.2902	0.0751	0.4164	0.5	0.5	0.6667	0.5	0.3334	0.3334	0.6667	-1	0.4
DecisionTable	ReliefF	50	rules	0.8696	0.1304	0.8799	0.8696	0.863	0.863	0.137	0.7326	0.8662	0.8298	0.1702	0.8582	0.8298	0.8458	0.8458	0.1542	0.6754	0.8368
SimpleLogistic	ReliefF	50	functions	0.8978	0.1022	0.9122	0.8978	0.9034	0.9034	0.0966	0.8012	0.9005	0.8511	0.149	0.8652	0.8511	0.8475	0.8475	0.1526	0.6985	0.8492
LADTree	ReliefF	50	trees	0.8669	0.1331	0.8853	0.8669	0.8731	0.8731	0.1269	0.7401	0.8699	0.8564	0.1437	0.8794	0.8564	0.8689	0.8689	0.1311	0.7252	0.8621
RandomTree	InfoGain	10	trees	0.8454	0.1546	0.8638	0.8454	0.8473	0.8473	0.1527	0.6927	0.8464	0.8404	0.1596	0.8582	0.8404	0.8404	0.8404	0.1596	0.6809	0.8404
NNge	SymmerU	50	rules	0.879	0.121	0.8996	0.879	0.8925	0.8925	0.1075	0.7714	0.8852	0.8458	0.1543	0.8723	0.8458	0.8625	0.8625	0.1375	0.708	0.8532
BayesianLogisticRegression	GainRatio	100*	bayes	0.5148	0.4852	0.414	0.5148	0.5203	0.5203	0.4797	0.0347	0.4038	0.4202	0.5798	0.3121	0.4202	0.3601	0.3601	0.6399	-0.2113	0.2879
HyperPipes	SymmerU	30	misc	0.8253	0.1747	0.7921	0.8253	0.7892	0.7892	0.2108	0.6134	0.7855	0.8085	0.1915	0.773	0.8085	0.7743	0.7743	0.2258	0.5817	0.7669
NBTree	InfoGain	10	trees	0.9059	0.0941	0.9247	0.9059	0.923	0.923	0.077	0.8288	0.9136	0.8777	0.1223	0.8865	0.8777	0.8701	0.8701	0.1299	0.7477	0.8737
VFI	SymmerU	30	misc	0.8441	0.1559	0.8441	0.8441	0.8228	0.8228	0.1772	0.6666	0.8307	0.9043	0.0958	0.9007	0.9043	0.8829	0.8829	0.1171	0.7869	0.8916
LMT	InfoGain	10	trees	0.9005	0.0995	0.9086	0.9005	0.8954	0.8954	0.1046	0.7959	0.8979	0.883	0.117	0.8936	0.883	0.879	0.879	0.121	0.762	0.8809
LADTree	OneR	30	trees	0.9005	0.0995	0.9122	0.9005	0.9016	0.9016	0.0984	0.8022	0.9011	0.8617	0.1383	0.8794	0.8617	0.8657	0.8657	0.1343	0.7274	0.8637
LMT	OneR	30	trees	0.9059	0.0941	0.9104	0.9059	0.8958	0.8958	0.1042	0.8017	0.9005	0.8511	0.149	0.8723	0.8511	0.859	0.859	0.141	0.71	0.8548
NBTree	OneR	30	trees	0.8992	0.1008	0.9086	0.8992	0.8961	0.8961	0.1039	0.7952	0.8976	0.8777	0.1223	0.8865	0.8777	0.8701	0.8701	0.1299	0.7477	0.8737
Logistic	GainRatio	100*	functions	0.8065	0.1935	0.8315	0.8065	0.8116	0.8116	0.1884	0.6181	0.8089	0.8617	0.1383	0.8794	0.8617	0.8657	0.8657	0.1343	0.7274	0.8637
DecisionStump	OneR	30	trees	0.8992	0.1008	0.9086	0.8992	0.8961	0.8961	0.1039	0.7952	0.8976	0.867	0.133	0.8865	0.867	0.8754	0.8754	0.1247	0.7423	0.8709
FT	OneR	30	trees	0.8629	0.1371	0.8781	0.8629	0.8629	0.8629	0.1371	0.7258	0.8629	0.867	0.133	0.8865	0.867	0.8754	0.8754	0.1247	0.7423	0.8709
J48	OneR	30	trees	0.8898	0.1102	0.9032	0.8898	0.8919	0.8919	0.1081	0.7817	0.8908	0.8298	0.1702	0.8652	0.8298	0.8607	0.8607	0.1394	0.6897	0.8421
J48graft	OneR	30	trees	0.8884	0.1116	0.9068	0.8884	0.8998	0.8998	0.1002	0.7881	0.8937	0.8405	0.1596	0.8652	0.8405	0.8524	0.8524	0.1476	0.6927	0.8459
J48graft	InfoGain	10	trees	0.9046	0.0954	0.9194	0.9046	0.9126	0.9126	0.0874	0.8172	0.9084	0.8617	0.1383	0.8865	0.8617	0.8793	0.8793	0.1208	0.7407	0.8695
RandomTree	OneR	30	trees	0.8239	0.1761	0.8405	0.8239	0.8197	0.8197	0.1803	0.6437	0.8217	0.8564	0.1437	0.8794	0.8564	0.8689	0.8689	0.1311	0.7252	0.8621
REPTree	OneR	30	trees	0.9073	0.0927	0.9211	0.9073	0.9142	0.9142	0.0858	0.8214	0.9106	0.8564	0.1437	0.8794	0.8564	0.8689	0.8689	0.1311	0.7252	0.8621
NaiveBayesMultinomialUpdateable	GainRatio	100*	bayes	0.8387	0.1613	0.8692	0.8387	0.8614	0.8614	0.1386	0.6998	0.8483	0.8351	0.1649	0.8652	0.8351	0.8561	0.8561	0.144	0.6908	0.8441
SPegasos	ReliefF	30	functions	0.5054	0.4946	0.6703	0.5054	0.8345	0.8345	0.1655	0.0848	0.4115	0.5	0.5	0.6667	0.5	0.3334	0.3334	0.6667	-1	0.4
NNge	ReliefF	50	rules	0.8548	0.1452	0.8889	0.8548	0.8915	0.8915	0.1085	0.7454	0.8693	0.8139	0.1862	0.844	0.8139	0.829	0.829	0.171	0.6427	0.8205
DMNBtext	GainRatio	100*	bayes	0.8495	0.1505	0.8835	0.8495	0.8841	0.8841	0.1159	0.7327	0.8632	0.8298	0.1702	0.8652	0.8298	0.8607	0.8607	0.1394	0.6897	0.8421
NNge	OneR	30	rules	0.8884	0.1116	0.9104	0.8884	0.9075	0.9075	0.0925	0.7957	0.8969	0.8458	0.1543	0.8723	0.8458	0.8625	0.8625	0.1375	0.708	0.8532
MultilayerPerceptron	ReliefF	10	functions	0.8642	0.1358	0.8799	0.8642	0.8652	0.8652	0.1348	0.7295	0.8647	0.8298	0.1702	0.8511	0.8298	0.8334	0.8334	0.1666	0.6632	0.8316
RandomTree	ReliefF	50	trees	0.8306	0.1694	0.8459	0.8306	0.8256	0.8256	0.1744	0.6562	0.828	0.7978	0.2022	0.8227	0.7978	0.8012	0.8012	0.1989	0.599	0.7995
ComplementNaiveBayes	ReliefF	100*	bayes	0.8858	0.1142	0.8799	0.8858	0.8607	0.8607	0.1393	0.746	0.8699	0.8564	0.1437	0.8511	0.8564	0.8308	0.8308	0.1693	0.6867	0.8394
VFI	ReliefF	30	misc	0.6801	0.3199	0.647	0.6801	0.6611	0.6611	0.3389	0.3407	0.6411	0.6756	0.3244	0.5887	0.6756	0.6865	0.6865	0.3135	0.3619	0.5881
HyperPipes	ReliefF	30	misc	0.6828	0.3172	0.5932	0.6828	0.6964	0.6964	0.3036	0.379	0.5925	0.6968	0.3032	0.6099	0.6968	0.7064	0.7064	0.2936	0.403	0.6096
DMNBtext	ReliefF	100*	bayes	0.5108	0.4892	0.6523	0.5108	0.5359	0.5359	0.4641	0.0393	0.4618	0.5851	0.4149	0.7092	0.5851	0.7115	0.7115	0.2885	0.2683	0.5712
DecisionStump	ReliefF	50	trees	0.8548	0.1452	0.8674	0.8548	0.8494	0.8494	0.1506	0.7042	0.852	0.8511	0.149	0.8723	0.8511	0.859	0.859	0.141	0.71	0.8548
FilteredClassifier	ReliefF	30	meta	0.8522	0.1478	0.8746	0.8522	0.8624	0.8624	0.1376	0.7145	0.8569	0.8883	0.1117	0.9007	0.8883	0.8883	0.8883	0.1117	0.7766	0.8883
MultiClassClassifier	ReliefF	30	meta	0.8925	0.1075	0.9014	0.8925	0.8874	0.8874	0.1126	0.7799	0.8898	0.8511	0.149	0.8652	0.8511	0.8475	0.8475	0.1526	0.6985	0.8492
J48graft	ReliefF	50	trees	0.8562	0.1438	0.8781	0.8562	0.8666	0.8666	0.1334	0.7227	0.861	0.8298	0.1702	0.8582	0.8298	0.8458	0.8458	0.1542	0.6754	0.8368
Dagging	ReliefF	30	meta	0.8965	0.1035	0.9086	0.8965	0.8976	0.8976	0.1024	0.7941	0.897	0.8458	0.1543	0.8652	0.8458	0.8495	0.8495	0.1505	0.6953	0.8476
Bagging	ReliefF	30	meta	0.8884	0.1116	0.905	0.8884	0.8962	0.8962	0.1038	0.7846	0.8921	0.8724	0.1276	0.8936	0.8724	0.8854	0.8854	0.1146	0.7577	0.8784
NBTree	ReliefF	50	trees	0.8602	0.1398	0.8728	0.8602	0.8556	0.8556	0.1444	0.7158	0.8578	0.8032	0.1968	0.8227	0.8032	0.8001	0.8001	0.1999	0.6033	0.8016
RandomForest	ReliefF	50	trees	0.8831	0.1169	0.8943	0.8831	0.88	0.88	0.12	0.7631	0.8815	0.8617	0.1383	0.8794	0.8617	0.8657	0.8657	0.1343	0.7274	0.8637
END	SymmerU	10	meta	0.9086	0.0914	0.9247	0.9086	0.9205	0.9205	0.0795	0.829	0.9141	0.8777	0.1223	0.8936	0.8777	0.8818	0.8818	0.1182	0.7595	0.8797
Decorate	SymmerU	10	meta	0.9059	0.0941	0.9211	0.9059	0.9152	0.9152	0.0848	0.8211	0.9103	0.8724	0.1276	0.8865	0.8724	0.8724	0.8724	0.1276	0.7447	0.8724
Dagging	SymmerU	10	meta	0.9073	0.0927	0.905	0.9073	0.8878	0.8878	0.1122	0.7949	0.8959	0.8883	0.1117	0.8936	0.8883	0.8771	0.8771	0.123	0.7652	0.8822
Bagging	SymmerU	10	meta	0.9059	0.0941	0.9194	0.9059	0.9116	0.9116	0.0884	0.8175	0.9087	0.8724	0.1276	0.8865	0.8724	0.8724	0.8724	0.1276	0.7447	0.8724
MultiClassClassifier	SymmerU	10	meta	0.9059	0.0941	0.9122	0.9059	0.8987	0.8987	0.1013	0.8046	0.9021	0.883	0.117	0.8936	0.883	0.879	0.879	0.121	0.762	0.8809
MultiBoostAB	SymmerU	10	meta	0.8992	0.1008	0.9122	0.8992	0.9025	0.9025	0.0975	0.8017	0.9008	0.8617	0.1383	0.8794	0.8617	0.8657	0.8657	0.1343	0.7274	0.8637
LogitBoost	SymmerU	10	meta	0.8978	0.1022	0.9104	0.8978	0.9	0.9	0.1	0.7979	0.8989	0.867	0.133	0.8865	0.867	0.8754	0.8754	0.1247	0.7423	0.8709
FilteredClassifier	SymmerU	10	meta	0.9099	0.0901	0.9229	0.9099	0.9157	0.9157	0.0843	0.8256	0.9127	0.867	0.133	0.8865	0.867	0.8754	0.8754	0.1247	0.7423	0.8709
NaiveBayes	ReliefF	100*	bayes	0.8898	0.1102	0.8763	0.8898	0.858	0.858	0.142	0.7471	0.8677	0.8404	0.1596	0.8227	0.8404	0.8071	0.8071	0.193	0.6466	0.8131
VFI	SymmerU	10	misc	0.7272	0.2728	0.6487	0.7272	0.7248	0.7248	0.2752	0.4519	0.6487	0.7287	0.2713	0.6525	0.7287	0.7242	0.7242	0.2759	0.4529	0.6524
HyperPipes	SymmerU	10	misc	0.7272	0.2728	0.647	0.7272	0.7265	0.7265	0.2735	0.4537	0.647	0.7287	0.2713	0.6525	0.7287	0.7242	0.7242	0.2759	0.4529	0.6524
Logistic	ReliefF	100*	functions	0.797	0.203	0.8208	0.797	0.7987	0.7987	0.2013	0.5957	0.7978	0.7926	0.2075	0.8085	0.7926	0.784	0.784	0.2159	0.5766	0.7878
PART	InfoGain	10	rules	0.9099	0.0901	0.9247	0.9099	0.9194	0.9194	0.0806	0.8292	0.9144	0.867	0.133	0.8865	0.867	0.8754	0.8754	0.1247	0.7423	0.8709
BayesianLogisticRegression	ReliefF	100*	bayes	0.621	0.379	0.5538	0.621	0.62	0.62	0.38	0.241	0.5538	0.7021	0.2979	0.6454	0.7021	0.6877	0.6877	0.3123	0.3895	0.644
BayesNet	ReliefF	100*	bayes	0.9046	0.0954	0.9104	0.9046	0.8964	0.8964	0.1036	0.8009	0.9002	0.8511	0.149	0.8652	0.8511	0.8475	0.8475	0.1526	0.6985	0.8492
DTNB	SymmerU	30	rules	0.9046	0.0954	0.914	0.9046	0.9024	0.9024	0.0976	0.807	0.9035	0.8617	0.1383	0.8794	0.8617	0.8657	0.8657	0.1343	0.7274	0.8637
Bagging	InfoGain	100*	meta	0.9113	0.0887	0.9229	0.9113	0.9147	0.9147	0.0853	0.826	0.913	0.8936	0.1064	0.9007	0.8936	0.8858	0.8858	0.1143	0.7793	0.8895
Bagging	ReliefF	50	meta	0.879	0.121	0.8978	0.879	0.8889	0.8889	0.1111	0.7679	0.8836	0.8724	0.1276	0.8865	0.8724	0.8724	0.8724	0.1276	0.7447	0.8724
DecisionTable	OneR	30	rules	0.8911	0.1089	0.9068	0.8911	0.8978	0.8978	0.1022	0.7889	0.8943	0.867	0.133	0.8865	0.867	0.8754	0.8754	0.1247	0.7423	0.8709
SPegasos	GainRatio	30	functions	0.5148	0.4852	0.6756	0.5148	0.7652	0.7652	0.2348	0.1252	0.433	0.5054	0.4947	0.6667	0.5054	0.5846	0.5846	0.4155	0.0424	0.4196
MultilayerPerceptron	GainRatio	30	functions	0.8831	0.1169	0.8978	0.8831	0.8862	0.8862	0.1138	0.7693	0.8846	0.8883	0.1117	0.8865	0.8883	0.8679	0.8679	0.1322	0.7558	0.8761
RBFNetwork	GainRatio	30	functions	0.8804	0.1196	0.8978	0.8804	0.888	0.888	0.112	0.7683	0.884	0.8085	0.1915	0.8582	0.8085	0.8674	0.8674	0.1326	0.6733	0.8281
IBk	GainRatio	30	lazy	0.8387	0.1613	0.8566	0.8387	0.8387	0.8387	0.1613	0.6774	0.8387	0.8617	0.1383	0.8794	0.8617	0.8657	0.8657	0.1343	0.7274	0.8637
KStar	GainRatio	30	lazy	0.8441	0.1559	0.8566	0.8441	0.8371	0.8371	0.1629	0.6812	0.8404	0.7872	0.2128	0.8156	0.7872	0.7938	0.7938	0.2063	0.5809	0.7903
ZeroR	OneR	30	rules	0.5	0.5	0.6667	0.5	-0.1667	-0.1667	0.6667	-1	0.4	0.5	0.5	0.6667	0.5	0.3334	0.3334	0.6667	-1	0.4
Ridor	OneR	30	rules	0.875	0.125	0.8925	0.875	0.8813	0.8813	0.1187	0.7563	0.878	0.8511	0.149	0.8723	0.8511	0.859	0.859	0.141	0.71	0.8548
BFTree	OneR	30	trees	0.8911	0.1089	0.9104	0.8911	0.905	0.905	0.095	0.796	0.8975	0.8511	0.149	0.8723	0.8511	0.859	0.859	0.141	0.71	0.8548
ADTree	OneR	30	trees	0.8938	0.1062	0.8996	0.8938	0.884	0.884	0.116	0.7778	0.8886	0.8617	0.1383	0.8794	0.8617	0.8657	0.8657	0.1343	0.7274	0.8637
LWL	GainRatio	30	lazy	0.8992	0.1008	0.9086	0.8992	0.8961	0.8961	0.1039	0.7952	0.8976	0.8883	0.1117	0.9007	0.8883	0.8883	0.8883	0.1117	0.7766	0.8883
AdaBoostM1	GainRatio	30	meta	0.8992	0.1008	0.9086	0.8992	0.8961	0.8961	0.1039	0.7952	0.8976	0.867	0.133	0.8865	0.867	0.8754	0.8754	0.1247	0.7423	0.8709
DecisionStump	GainRatio	30	trees	0.8992	0.1008	0.9086	0.8992	0.8961	0.8961	0.1039	0.7952	0.8976	0.867	0.133	0.8865	0.867	0.8754	0.8754	0.1247	0.7423	0.8709
ConjunctiveRule	SymmerU	50	rules	0.8844	0.1156	0.9014	0.8844	0.8921	0.8921	0.1079	0.7764	0.888	0.867	0.133	0.8865	0.867	0.8754	0.8754	0.1247	0.7423	0.8709
REPTree	ReliefF	100*	trees	0.836	0.164	0.8584	0.836	0.8427	0.8427	0.1573	0.6787	0.8392	0.7553	0.2447	0.8014	0.7553	0.7836	0.7836	0.2165	0.5381	0.7657
RandomTree	ReliefF	100*	trees	0.8253	0.1747	0.8387	0.8253	0.8172	0.8172	0.1828	0.6424	0.8209	0.8139	0.1862	0.8298	0.8139	0.8076	0.8076	0.1924	0.6214	0.8105
LibSVM	GainRatio	30	functions	0.5	0.5	0.6667	0.5	-0.1667	-0.1667	0.6667	-1	0.4	0.5	0.5	0.6667	0.5	0.3334	0.3334	0.6667	-1	0.4
FT	ReliefF	100*	trees	0.8656	0.1344	0.8835	0.8656	0.8707	0.8707	0.1293	0.7363	0.8681	0.8511	0.1489	0.8794	0.8511	0.873	0.873	0.127	0.7237	0.8605
DecisionStump	ReliefF	100*	trees	0.8548	0.1452	0.8674	0.8548	0.8494	0.8494	0.1506	0.7042	0.852	0.8511	0.149	0.8723	0.8511	0.859	0.859	0.141	0.71	0.8548
J48graft	ReliefF	100*	trees	0.8642	0.1358	0.8835	0.8642	0.8715	0.8715	0.1285	0.7357	0.8677	0.8404	0.1596	0.8582	0.8404	0.8404	0.8404	0.1596	0.6809	0.8404
J48	ReliefF	100*	trees	0.836	0.164	0.8548	0.836	0.8369	0.8369	0.1631	0.673	0.8365	0.7766	0.2234	0.8014	0.7766	0.7766	0.7766	0.2234	0.5532	0.7766
LMT	ReliefF	100*	trees	0.9005	0.0995	0.9176	0.9005	0.9122	0.9122	0.0878	0.8127	0.906	0.8564	0.1436	0.8723	0.8564	0.8564	0.8564	0.1436	0.7128	0.8564
LADTree	ReliefF	100*	trees	0.8669	0.1331	0.8781	0.8669	0.8613	0.8613	0.1387	0.7282	0.864	0.8511	0.1489	0.8794	0.8511	0.873	0.873	0.127	0.7237	0.8605
RandomForest	ReliefF	100*	trees	0.8871	0.1129	0.9014	0.8871	0.8903	0.8903	0.1097	0.7774	0.8887	0.8404	0.1596	0.8582	0.8404	0.8404	0.8404	0.1596	0.6809	0.8404
NBTree	ReliefF	100*	trees	0.836	0.164	0.8495	0.836	0.8292	0.8292	0.1708	0.6652	0.8324	0.8085	0.1915	0.844	0.8085	0.8325	0.8325	0.1676	0.6405	0.8183
ADTree	ReliefF	100*	trees	0.8602	0.1398	0.8763	0.8602	0.8612	0.8612	0.1388	0.7214	0.8607	0.8724	0.1276	0.8794	0.8724	0.8616	0.8616	0.1385	0.7338	0.8664
BFTree	ReliefF	100*	trees	0.8589	0.1411	0.8781	0.8589	0.8649	0.8649	0.1351	0.7238	0.8618	0.7819	0.2181	0.8085	0.7819	0.785	0.785	0.215	0.5669	0.7834
VotedPerceptron	InfoGain	50	functions	0.7634	0.2366	0.8315	0.7634	0.8555	0.8555	0.1445	0.6121	0.7866	0.8298	0.1703	0.8723	0.8298	0.8787	0.8787	0.1214	0.7067	0.8474
OneR	ReliefF	100*	rules	0.8427	0.1573	0.8692	0.8427	0.8584	0.8584	0.1416	0.7009	0.8497	0.8138	0.1862	0.8511	0.8138	0.8432	0.8432	0.1568	0.6564	0.8255
PART	ReliefF	100*	rules	0.8642	0.1358	0.8728	0.8642	0.8544	0.8544	0.1456	0.7186	0.8589	0.7819	0.2181	0.8298	0.7819	0.8237	0.8237	0.1764	0.6041	0.7966
Ridor	ReliefF	100*	rules	0.8333	0.1667	0.871	0.8333	0.8707	0.8707	0.1293	0.703	0.8477	0.8351	0.1649	0.8723	0.8351	0.8722	0.8722	0.1279	0.7063	0.8495
ZeroR	ReliefF	100*	rules	0.5	0.5	0.6667	0.5	-0.1667	-0.1667	0.6667	-1	0.4	0.5	0.5	0.6667	0.5	0.3334	0.3334	0.6667	-1	0.4
ConjunctiveRule	ReliefF	100*	rules	0.8616	0.1384	0.8566	0.8616	0.8364	0.8364	0.1636	0.6975	0.8451	0.8671	0.1329	0.8794	0.8671	0.8633	0.8633	0.1367	0.7303	0.8651
DecisionTable	ReliefF	100*	rules	0.8683	0.1317	0.8781	0.8683	0.8609	0.8609	0.1391	0.7291	0.8643	0.8032	0.1968	0.844	0.8032	0.8367	0.8367	0.1633	0.639	0.816
DTNB	ReliefF	100*	rules	0.8858	0.1142	0.8961	0.8858	0.8817	0.8817	0.1183	0.7675	0.8837	0.8458	0.1543	0.8652	0.8458	0.8495	0.8495	0.1505	0.6953	0.8476
NNge	ReliefF	100*	rules	0.8401	0.1599	0.8763	0.8401	0.8767	0.8767	0.1233	0.7158	0.8543	0.7979	0.2021	0.8369	0.7979	0.8258	0.8258	0.1743	0.623	0.8089
END	InfoGain	50	meta	0.8804	0.1196	0.8925	0.8804	0.8784	0.8784	0.1216	0.7587	0.8794	0.9043	0.0958	0.9149	0.9043	0.9043	0.9043	0.0958	0.8085	0.9043
Decorate	InfoGain	50	meta	0.9059	0.0941	0.9176	0.9059	0.9081	0.9081	0.0919	0.814	0.907	0.8617	0.1383	0.8723	0.8617	0.8545	0.8545	0.1456	0.7161	0.8579
Dagging	InfoGain	50	meta	0.9194	0.0806	0.9158	0.9194	0.8994	0.8994	0.1006	0.8185	0.9077	0.9096	0.0904	0.9078	0.9096	0.891	0.891	0.109	0.8003	0.8989
Bagging	InfoGain	50	meta	0.9113	0.0887	0.9247	0.9113	0.9183	0.9183	0.0817	0.8295	0.9146	0.8883	0.1117	0.8936	0.8883	0.8771	0.8771	0.123	0.7652	0.8822
MultiClassClassifier	InfoGain	50	meta	0.8629	0.1371	0.8656	0.8629	0.8456	0.8456	0.1544	0.7083	0.8527	0.8724	0.1276	0.8652	0.8724	0.8456	0.8456	0.1544	0.7174	0.8547
MultiBoostAB	InfoGain	50	meta	0.8992	0.1008	0.9122	0.8992	0.9025	0.9025	0.0975	0.8017	0.9008	0.8829	0.1171	0.8865	0.8829	0.8686	0.8686	0.1314	0.7515	0.8749
LogitBoost	InfoGain	50	meta	0.9086	0.0914	0.9176	0.9086	0.9064	0.9064	0.0936	0.815	0.9075	0.8564	0.1437	0.8794	0.8564	0.8689	0.8689	0.1311	0.7252	0.8621
FilteredClassifier	InfoGain	50	meta	0.8804	0.1196	0.8996	0.8804	0.8915	0.8915	0.1085	0.7718	0.8855	0.8245	0.1755	0.8511	0.8245	0.8359	0.8359	0.1641	0.6602	0.8297
VFI	InfoGain	50	misc	0.8642	0.1358	0.8548	0.8642	0.8354	0.8354	0.1646	0.6991	0.8443	0.8244	0.1755	0.8085	0.8244	0.7927	0.7927	0.2073	0.6163	0.7981
HyperPipes	InfoGain	50	misc	0.8804	0.1196	0.8692	0.8804	0.8503	0.8503	0.1497	0.73	0.8597	0.8298	0.1703	0.8156	0.8298	0.7986	0.7986	0.2015	0.6276	0.805
ZeroR	InfoGain	30	rules	0.5	0.5	0.6667	0.5	-0.1667	-0.1667	0.6667	-1	0.4	0.5	0.5	0.6667	0.5	0.3334	0.3334	0.6667	-1	0.4
Ridor	InfoGain	30	rules	0.8777	0.1223	0.8978	0.8777	0.8899	0.8899	0.1101	0.7675	0.8833	0.8298	0.1702	0.8582	0.8298	0.8458	0.8458	0.1542	0.6754	0.8368
PART	InfoGain	30	rules	0.8831	0.1169	0.905	0.8831	0.9005	0.9005	0.0995	0.7834	0.8909	0.8671	0.1329	0.8794	0.8671	0.8633	0.8633	0.1367	0.7303	0.8651
OneR	InfoGain	30	rules	0.8898	0.1102	0.914	0.8898	0.9145	0.9145	0.0855	0.8039	0.9004	0.867	0.133	0.8865	0.867	0.8754	0.8754	0.1247	0.7423	0.8709
NNge	InfoGain	30	rules	0.8978	0.1022	0.9158	0.8978	0.9107	0.9107	0.0893	0.8085	0.9038	0.8617	0.1383	0.8865	0.8617	0.8793	0.8793	0.1208	0.7407	0.8695
DTNB	InfoGain	30	rules	0.9032	0.0968	0.9122	0.9032	0.9001	0.9001	0.0999	0.8033	0.9016	0.8617	0.1383	0.8794	0.8617	0.8657	0.8657	0.1343	0.7274	0.8637
DecisionTable	InfoGain	30	rules	0.8965	0.1035	0.9068	0.8965	0.8944	0.8944	0.1056	0.7909	0.8954	0.867	0.133	0.8865	0.867	0.8754	0.8754	0.1247	0.7423	0.8709
ConjunctiveRule	InfoGain	30	rules	0.8844	0.1156	0.9014	0.8844	0.8921	0.8921	0.1079	0.7764	0.888	0.867	0.133	0.8865	0.867	0.8754	0.8754	0.1247	0.7423	0.8709
BFTree	InfoGain	30	trees	0.8884	0.1116	0.8961	0.8884	0.8806	0.8806	0.1194	0.769	0.8843	0.8617	0.1383	0.8865	0.8617	0.8793	0.8793	0.1208	0.7407	0.8695
ADTree	InfoGain	30	trees	0.8965	0.1035	0.9068	0.8965	0.8944	0.8944	0.1056	0.7909	0.8954	0.8724	0.1276	0.8865	0.8724	0.8724	0.8724	0.1276	0.7447	0.8724
DMNBtext	OneR	100*	bayes	0.8669	0.1331	0.8925	0.8669	0.8875	0.8875	0.1125	0.7542	0.8759	0.8617	0.1383	0.8794	0.8617	0.8657	0.8657	0.1343	0.7274	0.8637
ComplementNaiveBayes	OneR	100*	bayes	0.9019	0.0981	0.9032	0.9019	0.8867	0.8867	0.1133	0.7884	0.8933	0.8671	0.1329	0.8794	0.8671	0.8633	0.8633	0.1367	0.7303	0.8651
NaiveBayesMultinomialUpdateable	OneR	100*	bayes	0.8898	0.1102	0.9014	0.8898	0.8887	0.8887	0.1113	0.7785	0.8893	0.867	0.133	0.8865	0.867	0.8754	0.8754	0.1247	0.7423	0.8709
NaiveBayesMultinomial	OneR	100*	bayes	0.9019	0.0981	0.9032	0.9019	0.8867	0.8867	0.1133	0.7884	0.8933	0.8671	0.1329	0.8794	0.8671	0.8633	0.8633	0.1367	0.7303	0.8651
Logistic	OneR	100*	functions	0.793	0.207	0.8065	0.793	0.7819	0.7819	0.2181	0.5748	0.7866	0.8405	0.1596	0.8369	0.8405	0.8159	0.8159	0.1841	0.6559	0.8241
NaiveBayes	OneR	100*	bayes	0.8965	0.1035	0.8978	0.8965	0.8807	0.8807	0.1193	0.777	0.8875	0.8671	0.133	0.8723	0.8671	0.8533	0.8533	0.1468	0.7202	0.8593
BayesNet	OneR	100*	bayes	0.9032	0.0968	0.914	0.9032	0.9032	0.9032	0.0968	0.8065	0.9032	0.8777	0.1223	0.8936	0.8777	0.8818	0.8818	0.1182	0.7595	0.8797
BayesianLogisticRegression	OneR	100*	bayes	0.461	0.539	0.3405	0.461	0.421	0.421	0.579	-0.1109	0.3107	0.4628	0.5373	0.3404	0.4628	0.422	0.422	0.578	-0.1078	0.3092
SimpleLogistic	OneR	100*	functions	0.8965	0.1035	0.905	0.8965	0.8914	0.8914	0.1086	0.7879	0.8938	0.883	0.117	0.8936	0.883	0.879	0.879	0.121	0.762	0.8809
LibSVM	ReliefF	30	functions	0.5	0.5	0.6667	0.5	-0.1667	-0.1667	0.6667	-1	0.4	0.5	0.5	0.6667	0.5	0.3334	0.3334	0.6667	-1	0.4
LibSVM	OneR	100*	functions	0.5	0.5	0.6667	0.5	-0.1667	-0.1667	0.6667	-1	0.4	0.5	0.5	0.6667	0.5	0.3334	0.3334	0.6667	-1	0.4
MultiBoostAB	InfoGain	100*	meta	0.9019	0.0981	0.914	0.9019	0.9041	0.9041	0.0959	0.806	0.903	0.8829	0.1171	0.8865	0.8829	0.8686	0.8686	0.1314	0.7515	0.8749
MultiClassClassifier	InfoGain	100*	meta	0.7742	0.2258	0.7849	0.7742	0.7596	0.7596	0.2404	0.5336	0.7652	0.8511	0.149	0.8582	0.8511	0.8379	0.8379	0.1621	0.6888	0.8436
FilteredClassifier	InfoGain	100*	meta	0.8831	0.1169	0.9014	0.8831	0.893	0.893	0.107	0.776	0.8877	0.8138	0.1862	0.8511	0.8138	0.8432	0.8432	0.1568	0.6564	0.8255
LogitBoost	InfoGain	100*	meta	0.8898	0.1102	0.9032	0.8898	0.8919	0.8919	0.1081	0.7817	0.8908	0.8564	0.1437	0.8794	0.8564	0.8689	0.8689	0.1311	0.7252	0.8621
Decorate	InfoGain	100*	meta	0.9113	0.0887	0.9229	0.9113	0.9147	0.9147	0.0853	0.826	0.913	0.867	0.133	0.8865	0.867	0.8754	0.8754	0.1247	0.7423	0.8709
END	InfoGain	100*	meta	0.8535	0.1465	0.8656	0.8535	0.8472	0.8472	0.1528	0.7007	0.8502	0.8245	0.1755	0.8369	0.8245	0.8151	0.8151	0.185	0.6395	0.8193
NNge	SymmerU	100*	rules	0.8844	0.1156	0.905	0.8844	0.8993	0.8993	0.1007	0.7836	0.8912	0.8511	0.1489	0.8794	0.8511	0.873	0.873	0.127	0.7237	0.8605
Dagging	InfoGain	100*	meta	0.9207	0.0793	0.9229	0.9207	0.9093	0.9093	0.0907	0.8299	0.9145	0.8777	0.1224	0.8794	0.8777	0.8606	0.8606	0.1395	0.738	0.8677
HyperPipes	InfoGain	100*	misc	0.8804	0.1196	0.8835	0.8804	0.8652	0.8652	0.1348	0.7454	0.8717	0.8351	0.1649	0.8369	0.8351	0.8151	0.8151	0.1849	0.6499	0.8226
VFI	InfoGain	100*	misc	0.8656	0.1344	0.871	0.8656	0.8518	0.8518	0.1482	0.7172	0.8578	0.8351	0.1649	0.8298	0.8351	0.8093	0.8093	0.1908	0.6438	0.8172
ConjunctiveRule	OneR	10	rules	0.8844	0.1156	0.9014	0.8844	0.8921	0.8921	0.1079	0.7764	0.888	0.867	0.133	0.8865	0.867	0.8754	0.8754	0.1247	0.7423	0.8709
DecisionTable	OneR	10	rules	0.8898	0.1102	0.9032	0.8898	0.8919	0.8919	0.1081	0.7817	0.8908	0.8511	0.149	0.8652	0.8511	0.8475	0.8475	0.1526	0.6985	0.8492
DTNB	OneR	10	rules	0.9086	0.0914	0.9229	0.9086	0.9167	0.9167	0.0833	0.8253	0.9125	0.8617	0.1383	0.8723	0.8617	0.8545	0.8545	0.1456	0.7161	0.8579
NNge	OneR	10	rules	0.8925	0.1075	0.914	0.8925	0.9117	0.9117	0.0883	0.8039	0.901	0.867	0.133	0.8865	0.867	0.8754	0.8754	0.1247	0.7423	0.8709
OneR	OneR	10	rules	0.8898	0.1102	0.914	0.8898	0.9145	0.9145	0.0855	0.8039	0.9004	0.867	0.133	0.8865	0.867	0.8754	0.8754	0.1247	0.7423	0.8709
PART	OneR	10	rules	0.8817	0.1183	0.9032	0.8817	0.8978	0.8978	0.1022	0.7794	0.889	0.8617	0.1383	0.8794	0.8617	0.8657	0.8657	0.1343	0.7274	0.8637
Ridor	OneR	10	rules	0.8952	0.1048	0.914	0.8952	0.9092	0.9092	0.0908	0.8043	0.9016	0.8777	0.1223	0.8865	0.8777	0.8701	0.8701	0.1299	0.7477	0.8737
ZeroR	OneR	10	rules	0.5	0.5	0.6667	0.5	-0.1667	-0.1667	0.6667	-1	0.4	0.5	0.5	0.6667	0.5	0.3334	0.3334	0.6667	-1	0.4
ADTree	OneR	10	trees	0.8992	0.1008	0.9086	0.8992	0.8961	0.8961	0.1039	0.7952	0.8976	0.8724	0.1276	0.8865	0.8724	0.8724	0.8724	0.1276	0.7447	0.8724
BFTree	OneR	10	trees	0.8858	0.1142	0.9032	0.8858	0.8946	0.8946	0.1054	0.7803	0.8899	0.8724	0.1276	0.8936	0.8724	0.8854	0.8854	0.1146	0.7577	0.8784

## Sheet: BRCA-miRNA
#'_cv' means cross validation and '_ind' means independent test
name	VarSeleClass	NumOfVar	ModelingClass	TPR_cv	FPR_cv	ACC_cv	SPC_cv	PPV_cv	NPV_cv	FDR_cv	MCC_cv	F1_cv	TPR_ind	FPR_ind	ACC_ind	SPC_ind	PPV_ind	NPV_ind	FDR_ind	MCC_ind	F1_ind
AdaBoostM1	GainRatio	10	meta	0.8239	0.1761	0.853	0.8239	0.8398	0.8398	0.1602	0.6635	0.8309	0.7978	0.2022	0.8014	0.7978	0.7782	0.7782	0.2218	0.5758	0.785
LogitBoost	SymmerU	30	meta	0.8481	0.1519	0.8728	0.8481	0.8616	0.8616	0.1384	0.7096	0.8542	0.8032	0.1968	0.8227	0.8032	0.8001	0.8001	0.1999	0.6033	0.8016
LADTree	ReliefF	30	trees	0.8145	0.1855	0.8351	0.8145	0.8145	0.8145	0.1855	0.629	0.8145	0.7873	0.2128	0.8085	0.7873	0.7843	0.7843	0.2158	0.5715	0.7857
LMT	ReliefF	30	trees	0.8374	0.1626	0.8692	0.8374	0.8626	0.8626	0.1374	0.6995	0.8478	0.7873	0.2128	0.8298	0.7873	0.819	0.819	0.181	0.6054	0.7993
NBTree	ReliefF	30	trees	0.8172	0.1828	0.8423	0.8172	0.8245	0.8245	0.1755	0.6416	0.8206	0.7926	0.2075	0.8014	0.7926	0.7771	0.7771	0.2229	0.5695	0.7831
RandomForest	ReliefF	30	trees	0.8454	0.1546	0.862	0.8454	0.8445	0.8445	0.1555	0.6899	0.845	0.8139	0.1862	0.8369	0.8139	0.8173	0.8173	0.1827	0.6311	0.8155
DecisionStump	ReliefF	30	trees	0.8226	0.1774	0.8262	0.8226	0.8037	0.8037	0.1963	0.626	0.8108	0.7872	0.2128	0.7872	0.7872	0.7651	0.7651	0.235	0.5518	0.7715
FT	ReliefF	30	trees	0.8132	0.1868	0.8459	0.8132	0.833	0.833	0.167	0.6459	0.8216	0.8032	0.1968	0.8156	0.8032	0.7918	0.7918	0.2082	0.5949	0.7967
J48	ReliefF	30	trees	0.7917	0.2083	0.8226	0.7917	0.803	0.803	0.197	0.5946	0.7967	0.8404	0.1596	0.8511	0.8404	0.8306	0.8306	0.1695	0.6709	0.835
J48graft	ReliefF	30	trees	0.797	0.203	0.8315	0.797	0.8159	0.8159	0.1841	0.6126	0.805	0.8404	0.1596	0.8511	0.8404	0.8306	0.8306	0.1695	0.6709	0.835
RandomTree	ReliefF	30	trees	0.7285	0.2715	0.767	0.7285	0.7381	0.7381	0.2619	0.4665	0.7327	0.766	0.234	0.766	0.766	0.7441	0.7441	0.2559	0.5096	0.7496
REPTree	ReliefF	30	trees	0.7944	0.2056	0.8172	0.7944	0.7944	0.7944	0.2056	0.5887	0.7944	0.8139	0.1862	0.8298	0.8139	0.8076	0.8076	0.1924	0.6214	0.8105
DecisionTable	SymmerU	50	rules	0.7742	0.2258	0.8065	0.7742	0.7839	0.7839	0.2161	0.5581	0.7786	0.8192	0.1809	0.8369	0.8192	0.8159	0.8159	0.1842	0.635	0.8175
RandomTree	InfoGain	50	trees	0.8199	0.1801	0.8477	0.8199	0.8323	0.8323	0.1677	0.6521	0.8255	0.8032	0.1969	0.8085	0.8032	0.7852	0.7852	0.2149	0.588	0.7917
REPTree	InfoGain	50	trees	0.8427	0.1573	0.8674	0.8427	0.8549	0.8549	0.1451	0.6976	0.8483	0.8032	0.1968	0.8369	0.8032	0.8222	0.8222	0.1779	0.6251	0.8112
NNge	SymmerU	100*	rules	0.8508	0.1492	0.8513	0.8508	0.8303	0.8303	0.1697	0.6808	0.8381	0.7926	0.2075	0.7872	0.7926	0.7672	0.7672	0.2329	0.5591	0.7733
MultiBoostAB	OneR	30	meta	0.8454	0.1546	0.8602	0.8454	0.8418	0.8418	0.1582	0.6873	0.8436	0.7873	0.2128	0.8085	0.7873	0.7843	0.7843	0.2158	0.5715	0.7857
J48	InfoGain	50	trees	0.8293	0.1707	0.8513	0.8293	0.8339	0.8339	0.1661	0.6632	0.8315	0.7659	0.2341	0.7872	0.7659	0.7607	0.7607	0.2394	0.5266	0.7631
J48graft	InfoGain	50	trees	0.8454	0.1546	0.8692	0.8454	0.8566	0.8566	0.1434	0.7019	0.8505	0.8032	0.1968	0.8298	0.8032	0.8101	0.8101	0.1899	0.6132	0.8064
DecisionStump	InfoGain	50	trees	0.8226	0.1774	0.8262	0.8226	0.8037	0.8037	0.1963	0.626	0.8108	0.7872	0.2128	0.7872	0.7872	0.7651	0.7651	0.235	0.5518	0.7715
FT	InfoGain	50	trees	0.8427	0.1573	0.8602	0.8427	0.8427	0.8427	0.1573	0.6855	0.8427	0.8404	0.1596	0.8582	0.8404	0.8404	0.8404	0.1596	0.6809	0.8404
NBTree	InfoGain	50	trees	0.8253	0.1747	0.8477	0.8253	0.8298	0.8298	0.1702	0.6551	0.8275	0.7713	0.2287	0.8014	0.7713	0.7775	0.7775	0.2226	0.5487	0.7742
RandomForest	InfoGain	50	trees	0.8522	0.1478	0.8728	0.8522	0.8592	0.8592	0.1408	0.7113	0.8555	0.8404	0.1596	0.8582	0.8404	0.8404	0.8404	0.1596	0.6809	0.8404
LADTree	InfoGain	50	trees	0.8185	0.1815	0.8459	0.8185	0.8299	0.8299	0.1701	0.6483	0.8237	0.8352	0.1649	0.8582	0.8352	0.8427	0.8427	0.1573	0.6778	0.8387
LMT	InfoGain	50	trees	0.8239	0.1761	0.862	0.8239	0.8588	0.8588	0.1412	0.6818	0.8374	0.8458	0.1543	0.8723	0.8458	0.8625	0.8625	0.1375	0.708	0.8532
KStar	SymmerU	50	lazy	0.6895	0.3105	0.7724	0.6895	0.7757	0.7757	0.2243	0.4572	0.7048	0.6809	0.3192	0.773	0.6809	0.7944	0.7944	0.2056	0.4615	0.696
IBk	SymmerU	50	lazy	0.8105	0.1895	0.8477	0.8105	0.8386	0.8386	0.1614	0.6485	0.8217	0.8032	0.1968	0.8369	0.8032	0.8222	0.8222	0.1779	0.6251	0.8112
NNge	ReliefF	30	rules	0.8024	0.1976	0.8369	0.8024	0.8227	0.8227	0.1773	0.6248	0.8109	0.7447	0.2553	0.773	0.7447	0.7447	0.7447	0.2553	0.4894	0.7447
BFTree	InfoGain	100*	trees	0.832	0.168	0.8602	0.832	0.8483	0.8483	0.1517	0.6801	0.8391	0.8085	0.1915	0.8369	0.8085	0.8194	0.8194	0.1807	0.6278	0.8135
SPegasos	SymmerU	50	functions	0.5	0.5	0.6667	0.5	-0.1667	-0.1667	0.6667	-1	0.4	0.5	0.5	0.6667	0.5	0.3334	0.3334	0.6667	-1	0.4
OneR	ReliefF	30	rules	0.8065	0.1935	0.8262	0.8065	0.804	0.804	0.196	0.6105	0.8052	0.75	0.25	0.766	0.75	0.7387	0.7387	0.2613	0.4885	0.7432
BFTree	OneR	10	trees	0.8239	0.1761	0.8566	0.8239	0.8469	0.8469	0.1531	0.6704	0.8335	0.8298	0.1702	0.8582	0.8298	0.8458	0.8458	0.1542	0.6754	0.8368
ADTree	OneR	10	trees	0.8468	0.1532	0.8692	0.8468	0.8558	0.8558	0.1442	0.7025	0.851	0.8404	0.1596	0.8582	0.8404	0.8404	0.8404	0.1596	0.6809	0.8404
ZeroR	OneR	10	rules	0.5	0.5	0.6667	0.5	-0.1667	-0.1667	0.6667	-1	0.4	0.5	0.5	0.6667	0.5	0.3334	0.3334	0.6667	-1	0.4
NNge	InfoGain	100*	rules	0.8562	0.1438	0.8566	0.8562	0.836	0.836	0.164	0.6919	0.8438	0.7873	0.2128	0.7801	0.7873	0.7611	0.7611	0.2389	0.5477	0.7666
ConjunctiveRule	InfoGain	100*	rules	0.8145	0.1855	0.8226	0.8145	0.7995	0.7995	0.2005	0.6138	0.8056	0.7872	0.2128	0.7872	0.7872	0.7651	0.7651	0.235	0.5518	0.7715
DecisionTable	InfoGain	100*	rules	0.8132	0.1868	0.8369	0.8132	0.8176	0.8176	0.1824	0.6307	0.8153	0.8032	0.1968	0.8298	0.8032	0.8101	0.8101	0.1899	0.6132	0.8064
Ridor	InfoGain	100*	rules	0.8253	0.1747	0.853	0.8253	0.839	0.839	0.161	0.6641	0.8314	0.7978	0.2022	0.8298	0.7978	0.8122	0.8122	0.1878	0.61	0.8041
ZeroR	InfoGain	100*	rules	0.5	0.5	0.6667	0.5	-0.1667	-0.1667	0.6667	-1	0.4	0.5	0.5	0.6667	0.5	0.3334	0.3334	0.6667	-1	0.4
OneR	InfoGain	100*	rules	0.7702	0.2298	0.8011	0.7702	0.7772	0.7772	0.2228	0.5473	0.7734	0.75	0.25	0.766	0.75	0.7387	0.7387	0.2613	0.4885	0.7432
ConjunctiveRule	OneR	10	rules	0.8132	0.1868	0.8226	0.8132	0.7994	0.7994	0.2006	0.6125	0.8051	0.7872	0.2128	0.7872	0.7872	0.7651	0.7651	0.235	0.5518	0.7715
ADTree	InfoGain	30	trees	0.832	0.168	0.8566	0.832	0.8417	0.8417	0.1583	0.6736	0.8365	0.8139	0.1862	0.844	0.8139	0.829	0.829	0.171	0.6427	0.8205
BFTree	InfoGain	30	trees	0.8454	0.1546	0.8692	0.8454	0.8566	0.8566	0.1434	0.7019	0.8505	0.8085	0.1915	0.8369	0.8085	0.8194	0.8194	0.1807	0.6278	0.8135
ConjunctiveRule	InfoGain	30	rules	0.8132	0.1868	0.8226	0.8132	0.7994	0.7994	0.2006	0.6125	0.8051	0.7872	0.2128	0.7872	0.7872	0.7651	0.7651	0.235	0.5518	0.7715
DecisionTable	InfoGain	30	rules	0.7984	0.2016	0.8333	0.7984	0.8184	0.8184	0.1816	0.6165	0.8067	0.8192	0.1809	0.8369	0.8192	0.8159	0.8159	0.1842	0.635	0.8175
DTNB	InfoGain	30	rules	0.828	0.172	0.8566	0.828	0.844	0.844	0.156	0.6718	0.835	0.8298	0.1702	0.8652	0.8298	0.8607	0.8607	0.1394	0.6897	0.8421
NNge	InfoGain	30	rules	0.8414	0.1586	0.8566	0.8414	0.8378	0.8378	0.1622	0.6792	0.8396	0.8085	0.1915	0.8298	0.8085	0.8085	0.8085	0.1915	0.617	0.8085
OneR	InfoGain	30	rules	0.7702	0.2298	0.8011	0.7702	0.7772	0.7772	0.2228	0.5473	0.7734	0.75	0.25	0.766	0.75	0.7387	0.7387	0.2613	0.4885	0.7432
PART	InfoGain	30	rules	0.8616	0.1384	0.8871	0.8616	0.8805	0.8805	0.1195	0.7419	0.8699	0.8351	0.1649	0.8227	0.8351	0.8046	0.8046	0.1954	0.639	0.8118
Ridor	InfoGain	30	rules	0.8374	0.1626	0.8602	0.8374	0.8451	0.8451	0.1549	0.6824	0.841	0.8032	0.1968	0.8298	0.8032	0.8101	0.8101	0.1899	0.6132	0.8064
ZeroR	InfoGain	30	rules	0.5	0.5	0.6667	0.5	-0.1667	-0.1667	0.6667	-1	0.4	0.5	0.5	0.6667	0.5	0.3334	0.3334	0.6667	-1	0.4
ZeroR	OneR	100*	rules	0.5	0.5	0.6667	0.5	-0.1667	-0.1667	0.6667	-1	0.4	0.5	0.5	0.6667	0.5	0.3334	0.3334	0.6667	-1	0.4
MultiBoostAB	SymmerU	50	meta	0.8441	0.1559	0.8584	0.8441	0.8396	0.8396	0.1604	0.6837	0.8418	0.8085	0.1915	0.8298	0.8085	0.8085	0.8085	0.1915	0.617	0.8085
DTNB	OneR	10	rules	0.8495	0.1505	0.8763	0.8495	0.8678	0.8678	0.1322	0.717	0.8575	0.8085	0.1915	0.844	0.8085	0.8325	0.8325	0.1676	0.6405	0.8183
MultiBoostAB	GainRatio	100*	meta	0.8508	0.1492	0.8638	0.8508	0.8454	0.8454	0.1546	0.6962	0.848	0.8085	0.1915	0.8298	0.8085	0.8085	0.8085	0.1915	0.617	0.8085
ZeroR	GainRatio	10	rules	0.5	0.5	0.6667	0.5	-0.1667	-0.1667	0.6667	-1	0.4	0.5	0.5	0.6667	0.5	0.3334	0.3334	0.6667	-1	0.4
VFI	OneR	100*	misc	0.797	0.203	0.7903	0.797	0.7708	0.7708	0.2292	0.5672	0.7769	0.7181	0.2819	0.7021	0.7181	0.6944	0.6944	0.3057	0.4117	0.6908
HyperPipes	OneR	100*	misc	0.6815	0.3185	0.6075	0.6815	0.68	0.68	0.32	0.3615	0.6075	0.5798	0.4202	0.4965	0.5798	0.5887	0.5887	0.4114	0.1682	0.4949
Decorate	GainRatio	100*	meta	0.8508	0.1492	0.8799	0.8508	0.8743	0.8743	0.1257	0.7247	0.8608	0.8298	0.1702	0.8511	0.8298	0.8334	0.8334	0.1666	0.6632	0.8316
NNge	GainRatio	10	rules	0.8414	0.1586	0.8638	0.8414	0.8492	0.8492	0.1508	0.6906	0.8451	0.8298	0.1702	0.8511	0.8298	0.8334	0.8334	0.1666	0.6632	0.8316
ConjunctiveRule	GainRatio	10	rules	0.8145	0.1855	0.8226	0.8145	0.7995	0.7995	0.2005	0.6138	0.8056	0.7872	0.2128	0.7872	0.7872	0.7651	0.7651	0.235	0.5518	0.7715
DecisionTable	GainRatio	10	rules	0.8118	0.1882	0.8459	0.8118	0.8339	0.8339	0.1661	0.6454	0.821	0.8139	0.1862	0.8369	0.8139	0.8173	0.8173	0.1827	0.6311	0.8155
END	OneR	100*	meta	0.7863	0.2137	0.8154	0.7863	0.7937	0.7937	0.2063	0.58	0.7897	0.7234	0.2766	0.7589	0.7234	0.7285	0.7285	0.2716	0.4518	0.7258
Decorate	OneR	100*	meta	0.8642	0.1358	0.8907	0.8642	0.886	0.886	0.114	0.7499	0.8736	0.8511	0.149	0.8723	0.8511	0.859	0.859	0.141	0.71	0.8548
Dagging	OneR	100*	meta	0.8427	0.1573	0.8746	0.8427	0.8697	0.8697	0.1303	0.7119	0.8539	0.8298	0.1702	0.8652	0.8298	0.8607	0.8607	0.1394	0.6897	0.8421
Bagging	OneR	100*	meta	0.8535	0.1465	0.8781	0.8535	0.8684	0.8684	0.1316	0.7217	0.8602	0.8085	0.1915	0.8298	0.8085	0.8085	0.8085	0.1915	0.617	0.8085
MultiClassClassifier	OneR	100*	meta	0.7621	0.2379	0.7867	0.7621	0.76	0.76	0.24	0.5221	0.761	0.7926	0.2075	0.8227	0.7926	0.8029	0.8029	0.1972	0.5953	0.7972
MultiBoostAB	OneR	100*	meta	0.8401	0.1599	0.853	0.8401	0.8332	0.8332	0.1668	0.6732	0.8364	0.8085	0.1915	0.8298	0.8085	0.8085	0.8085	0.1915	0.617	0.8085
LogitBoost	OneR	100*	meta	0.8522	0.1478	0.8746	0.8522	0.8624	0.8624	0.1376	0.7145	0.8569	0.8032	0.1968	0.8298	0.8032	0.8101	0.8101	0.1899	0.6132	0.8064
BFTree	GainRatio	10	trees	0.8253	0.1747	0.8495	0.8253	0.8327	0.8327	0.1673	0.658	0.8288	0.7819	0.2181	0.8156	0.7819	0.7956	0.7956	0.2045	0.5773	0.7878
SPegasos	OneR	50	functions	0.5	0.5	0.6667	0.5	-0.1667	-0.1667	0.6667	-1	0.4	0.5	0.5	0.6667	0.5	0.3334	0.3334	0.6667	-1	0.4
SimpleLogistic	OneR	50	functions	0.8118	0.1882	0.8495	0.8118	0.8414	0.8414	0.1586	0.6526	0.8235	0.867	0.133	0.8936	0.867	0.89	0.89	0.11	0.7566	0.8769
RBFNetwork	OneR	50	functions	0.8105	0.1895	0.8315	0.8105	0.8105	0.8105	0.1895	0.621	0.8105	0.75	0.25	0.8085	0.75	0.8036	0.8036	0.1964	0.551	0.7662
MultilayerPerceptron	OneR	50	functions	0.8454	0.1546	0.8728	0.8454	0.8636	0.8636	0.1364	0.7088	0.8534	0.8458	0.1543	0.8511	0.8458	0.8301	0.8301	0.17	0.6756	0.8366
KStar	OneR	50	lazy	0.6815	0.3185	0.7634	0.6815	0.7583	0.7583	0.2417	0.433	0.6952	0.6915	0.3085	0.7872	0.6915	0.8358	0.8358	0.1643	0.5071	0.7093
IBk	OneR	50	lazy	0.7984	0.2016	0.8369	0.7984	0.8254	0.8254	0.1746	0.6232	0.8091	0.75	0.25	0.7872	0.75	0.7621	0.7621	0.2379	0.512	0.7553
IB1	OneR	50	lazy	0.7984	0.2016	0.8369	0.7984	0.8254	0.8254	0.1746	0.6232	0.8091	0.75	0.25	0.7872	0.75	0.7621	0.7621	0.2379	0.512	0.7553
VotedPerceptron	OneR	50	functions	0.6626	0.3374	0.681	0.6626	0.6518	0.6518	0.3482	0.3143	0.6547	0.6383	0.3617	0.617	0.6383	0.6231	0.6231	0.3769	0.2609	0.6083
AdaBoostM1	OneR	50	meta	0.8522	0.1478	0.8763	0.8522	0.8658	0.8658	0.1342	0.7178	0.8583	0.8351	0.1649	0.8369	0.8351	0.8151	0.8151	0.1849	0.6499	0.8226
LWL	OneR	50	lazy	0.8293	0.1707	0.8315	0.8293	0.8095	0.8095	0.1905	0.6385	0.8169	0.7872	0.2128	0.7872	0.7872	0.7651	0.7651	0.235	0.5518	0.7715
HyperPipes	InfoGain	10	misc	0.5685	0.4315	0.4319	0.5685	0.6521	0.6521	0.3479	0.2042	0.4029	0.516	0.4841	0.3688	0.516	0.5594	0.5594	0.4407	0.0615	0.3194
VFI	InfoGain	10	misc	0.6747	0.3253	0.7778	0.6747	0.8376	0.8376	0.1624	0.4857	0.6891	0.6277	0.3724	0.7447	0.6277	0.7985	0.7985	0.2016	0.3904	0.6279
Decorate	InfoGain	10	meta	0.8616	0.1384	0.8835	0.8616	0.8732	0.8732	0.1268	0.7347	0.8669	0.8298	0.1702	0.8582	0.8298	0.8458	0.8458	0.1542	0.6754	0.8368
END	InfoGain	10	meta	0.8427	0.1573	0.862	0.8427	0.8456	0.8456	0.1544	0.6883	0.8441	0.8192	0.1809	0.844	0.8192	0.8264	0.8264	0.1736	0.6455	0.8226
Bagging	InfoGain	10	meta	0.8481	0.1519	0.8781	0.8481	0.8728	0.8728	0.1272	0.7205	0.8585	0.8085	0.1915	0.8298	0.8085	0.8085	0.8085	0.1915	0.617	0.8085
Dagging	InfoGain	10	meta	0.7675	0.2325	0.8333	0.7675	0.8543	0.8543	0.1457	0.6156	0.7902	0.8192	0.1808	0.8723	0.8192	0.8957	0.8957	0.1044	0.7107	0.843
MultiBoostAB	InfoGain	10	meta	0.8347	0.1653	0.853	0.8347	0.8347	0.8347	0.1653	0.6694	0.8347	0.7979	0.2021	0.8085	0.7979	0.7844	0.7844	0.2157	0.5821	0.7899
MultiClassClassifier	InfoGain	10	meta	0.8454	0.1546	0.8799	0.8454	0.8796	0.8796	0.1204	0.7243	0.859	0.8244	0.1755	0.8652	0.8244	0.8663	0.8663	0.1337	0.6895	0.8401
FilteredClassifier	InfoGain	10	meta	0.836	0.164	0.8674	0.836	0.8598	0.8598	0.1402	0.6954	0.846	0.8032	0.1968	0.8227	0.8032	0.8001	0.8001	0.1999	0.6033	0.8016
LogitBoost	InfoGain	10	meta	0.8454	0.1546	0.8692	0.8454	0.8566	0.8566	0.1434	0.7019	0.8505	0.8032	0.1968	0.8298	0.8032	0.8101	0.8101	0.1899	0.6132	0.8064
DMNBtext	SymmerU	10	bayes	0.5	0.5	0.6667	0.5	-0.1667	-0.1667	0.6667	-1	0.4	0.5	0.5	0.6667	0.5	0.3334	0.3334	0.6667	-1	0.4
ComplementNaiveBayes	SymmerU	10	bayes	0.75	0.25	0.7957	0.75	0.7758	0.7758	0.2242	0.5252	0.7597	0.7873	0.2128	0.8298	0.7873	0.819	0.819	0.181	0.6054	0.7993
NaiveBayesMultinomialUpdateable	SymmerU	10	bayes	0.75	0.25	0.7957	0.75	0.7758	0.7758	0.2242	0.5252	0.7597	0.7819	0.2181	0.8227	0.7819	0.8083	0.8083	0.1917	0.5896	0.7922
NaiveBayesMultinomial	SymmerU	10	bayes	0.7513	0.2487	0.7975	0.7513	0.7784	0.7784	0.2216	0.5291	0.7614	0.7873	0.2128	0.8298	0.7873	0.819	0.819	0.181	0.6054	0.7993
Logistic	SymmerU	10	functions	0.8401	0.1599	0.8781	0.8401	0.8813	0.8813	0.1187	0.7201	0.8557	0.8139	0.1861	0.8652	0.8139	0.8812	0.8812	0.1189	0.6917	0.8355
NaiveBayes	SymmerU	10	bayes	0.8038	0.1962	0.853	0.8038	0.8592	0.8592	0.1408	0.6606	0.8223	0.7979	0.2021	0.844	0.7979	0.842	0.842	0.158	0.6383	0.8135
BayesNet	SymmerU	10	bayes	0.8333	0.1667	0.8638	0.8333	0.8544	0.8544	0.1456	0.6874	0.8423	0.8139	0.1862	0.844	0.8139	0.829	0.829	0.171	0.6427	0.8205
BayesianLogisticRegression	SymmerU	10	bayes	0.5	0.5	0.3333	0.5	-0.3333	-0.3333	0.8333	-1	0.25	0.5	0.5	0.3333	0.5	0.1667	0.1667	0.8334	-1	0.25
FilteredClassifier	SymmerU	50	meta	0.8239	0.1761	0.8459	0.8239	0.8275	0.8275	0.1725	0.6514	0.8257	0.8139	0.1862	0.844	0.8139	0.829	0.829	0.171	0.6427	0.8205
LMT	ReliefF	100*	trees	0.8522	0.1478	0.8728	0.8522	0.8592	0.8592	0.1408	0.7113	0.8555	0.8458	0.1543	0.8652	0.8458	0.8495	0.8495	0.1505	0.6953	0.8476
LibSVM	SymmerU	10	functions	0.5	0.5	0.6667	0.5	-0.1667	-0.1667	0.6667	-1	0.4	0.5	0.5	0.6667	0.5	0.3334	0.3334	0.6667	-1	0.4
Logistic	ReliefF	50	functions	0.8333	0.1667	0.8584	0.8333	0.8441	0.8441	0.1559	0.6774	0.8383	0.7873	0.2128	0.8227	0.7873	0.8052	0.8052	0.1948	0.5922	0.7948
LibSVM	InfoGain	10	functions	0.5	0.5	0.6667	0.5	-0.1667	-0.1667	0.6667	-1	0.4	0.5	0.5	0.6667	0.5	0.3334	0.3334	0.6667	-1	0.4
BayesNet	InfoGain	10	bayes	0.8468	0.1532	0.8746	0.8468	0.8662	0.8662	0.1338	0.7127	0.8552	0.8085	0.1915	0.8369	0.8085	0.8194	0.8194	0.1807	0.6278	0.8135
BayesianLogisticRegression	InfoGain	10	bayes	0.5	0.5	0.3333	0.5	-0.3333	-0.3333	0.8333	-1	0.25	0.5	0.5	0.3333	0.5	0.1667	0.1667	0.8334	-1	0.25
Logistic	InfoGain	10	functions	0.8454	0.1546	0.8799	0.8454	0.8796	0.8796	0.1204	0.7243	0.859	0.8244	0.1755	0.8652	0.8244	0.8663	0.8663	0.1337	0.6895	0.8401
NaiveBayes	InfoGain	10	bayes	0.8011	0.1989	0.8513	0.8011	0.8577	0.8577	0.1423	0.6563	0.8198	0.7979	0.2021	0.844	0.7979	0.842	0.842	0.158	0.6383	0.8135
NaiveBayesMultinomialUpdateable	InfoGain	10	bayes	0.8253	0.1747	0.853	0.8253	0.839	0.839	0.161	0.6641	0.8314	0.8298	0.1702	0.8511	0.8298	0.8334	0.8334	0.1666	0.6632	0.8316
NaiveBayesMultinomial	InfoGain	10	bayes	0.828	0.172	0.8584	0.828	0.8475	0.8475	0.1525	0.6752	0.8363	0.8352	0.1649	0.8582	0.8352	0.8427	0.8427	0.1573	0.6778	0.8387
DMNBtext	InfoGain	10	bayes	0.5	0.5	0.6667	0.5	-0.1667	-0.1667	0.6667	-1	0.4	0.5	0.5	0.6667	0.5	0.3334	0.3334	0.6667	-1	0.4
ComplementNaiveBayes	InfoGain	10	bayes	0.8266	0.1734	0.8566	0.8266	0.8449	0.8449	0.1551	0.6713	0.8345	0.8352	0.1649	0.8582	0.8352	0.8427	0.8427	0.1573	0.6778	0.8387
BayesianLogisticRegression	GainRatio	10	bayes	0.6734	0.3266	0.5753	0.6734	0.6986	0.6986	0.3014	0.3711	0.5732	0.6915	0.3085	0.5957	0.6915	0.7127	0.7127	0.2873	0.4036	0.5944
BayesNet	OneR	30	bayes	0.8575	0.1425	0.8817	0.8575	0.8726	0.8726	0.1274	0.73	0.8643	0.8245	0.1755	0.8369	0.8245	0.8151	0.8151	0.185	0.6395	0.8193
DTNB	SymmerU	50	rules	0.8374	0.1626	0.8584	0.8374	0.8421	0.8421	0.1579	0.6794	0.8396	0.8245	0.1756	0.8582	0.8245	0.8497	0.8497	0.1503	0.6736	0.8348
VFI	GainRatio	100*	misc	0.8118	0.1882	0.8262	0.8118	0.8034	0.8034	0.1966	0.6152	0.8072	0.8032	0.1968	0.8227	0.8032	0.8001	0.8001	0.1999	0.6033	0.8016
LADTree	ReliefF	10	trees	0.8239	0.1761	0.8477	0.8239	0.8304	0.8304	0.1696	0.6543	0.827	0.8032	0.1968	0.8156	0.8032	0.7918	0.7918	0.2082	0.5949	0.7967
IB1	GainRatio	30	lazy	0.7339	0.2661	0.7796	0.7339	0.7551	0.7551	0.2449	0.4885	0.742	0.7234	0.2766	0.7518	0.7234	0.7211	0.7211	0.2789	0.4445	0.7222
IBk	GainRatio	100*	lazy	0.7191	0.2809	0.7832	0.7191	0.771	0.771	0.229	0.4873	0.7334	0.7394	0.2606	0.7943	0.7394	0.7797	0.7797	0.2203	0.5175	0.7524
LWL	SymmerU	50	lazy	0.8293	0.1707	0.8315	0.8293	0.8095	0.8095	0.1905	0.6385	0.8169	0.7872	0.2128	0.7872	0.7872	0.7651	0.7651	0.235	0.5518	0.7715
DMNBtext	ReliefF	10	bayes	0.5255	0.4745	0.6631	0.5255	0.5781	0.5781	0.4219	0.0893	0.4852	0.5	0.5	0.6596	0.5	0.5	0.5	0.5	0	0.4166
Decorate	ReliefF	30	meta	0.8481	0.1519	0.871	0.8481	0.8583	0.8583	0.1417	0.7063	0.8528	0.8086	0.1915	0.8227	0.8086	0.7996	0.7996	0.2005	0.608	0.8036
VotedPerceptron	GainRatio	30	functions	0.6425	0.3575	0.6129	0.6425	0.6275	0.6275	0.3725	0.2696	0.6067	0.5692	0.4309	0.5674	0.5692	0.5616	0.5616	0.4385	0.1305	0.5522
AdaBoostM1	SymmerU	10	meta	0.8589	0.1411	0.8817	0.8589	0.8716	0.8716	0.1284	0.7304	0.8647	0.7979	0.2021	0.8156	0.7979	0.792	0.792	0.2081	0.5898	0.7947
LWL	SymmerU	10	lazy	0.8293	0.1707	0.8315	0.8293	0.8095	0.8095	0.1905	0.6385	0.8169	0.7872	0.2128	0.7872	0.7872	0.7651	0.7651	0.235	0.5518	0.7715
IB1	SymmerU	10	lazy	0.8239	0.1761	0.8477	0.8239	0.8304	0.8304	0.1696	0.6543	0.827	0.7873	0.2128	0.8085	0.7873	0.7843	0.7843	0.2158	0.5715	0.7857
VotedPerceptron	SymmerU	10	functions	0.6546	0.3454	0.6308	0.6546	0.6376	0.6376	0.3624	0.2917	0.6227	0.5692	0.4309	0.5603	0.5692	0.5615	0.5615	0.4385	0.1304	0.5483
KStar	SymmerU	10	lazy	0.8011	0.1989	0.8459	0.8011	0.8433	0.8433	0.1567	0.643	0.8163	0.8085	0.1915	0.844	0.8085	0.8325	0.8325	0.1676	0.6405	0.8183
IBk	SymmerU	10	lazy	0.8239	0.1761	0.8477	0.8239	0.8304	0.8304	0.1696	0.6543	0.827	0.7873	0.2128	0.8085	0.7873	0.7843	0.7843	0.2158	0.5715	0.7857
RBFNetwork	SymmerU	10	functions	0.8159	0.1841	0.8602	0.8159	0.8633	0.8633	0.1367	0.6775	0.8328	0.7659	0.2341	0.8085	0.7659	0.7909	0.7909	0.2092	0.5562	0.7756
MultilayerPerceptron	SymmerU	10	functions	0.8589	0.1411	0.8835	0.8589	0.8752	0.8752	0.1248	0.7339	0.8661	0.8298	0.1702	0.8369	0.8298	0.8149	0.8149	0.1851	0.6444	0.821
SPegasos	SymmerU	10	functions	0.5	0.5	0.6667	0.5	-0.1667	-0.1667	0.6667	-1	0.4	0.5	0.5	0.6667	0.5	0.3334	0.3334	0.6667	-1	0.4
SimpleLogistic	SymmerU	10	functions	0.8347	0.1653	0.8728	0.8347	0.8737	0.8737	0.1263	0.7073	0.8496	0.8244	0.1755	0.8652	0.8244	0.8663	0.8663	0.1337	0.6895	0.8401
NaiveBayes	InfoGain	30	bayes	0.8038	0.1962	0.8495	0.8038	0.8494	0.8494	0.1506	0.6516	0.8199	0.8032	0.1968	0.8511	0.8032	0.8544	0.8544	0.1457	0.6556	0.8208
Logistic	InfoGain	30	functions	0.8024	0.1976	0.8459	0.8024	0.8419	0.8419	0.1581	0.6431	0.8169	0.8298	0.1702	0.8794	0.8298	0.9005	0.9005	0.0995	0.7269	0.8528
BayesianLogisticRegression	InfoGain	30	bayes	0.5013	0.4987	0.3369	0.5013	0.542	0.542	0.458	0.015	0.258	0.5	0.5	0.3333	0.5	0.1667	0.1667	0.8334	-1	0.25
BayesNet	InfoGain	30	bayes	0.8454	0.1546	0.8692	0.8454	0.8566	0.8566	0.1434	0.7019	0.8505	0.8032	0.1968	0.8227	0.8032	0.8001	0.8001	0.1999	0.6033	0.8016
ComplementNaiveBayes	InfoGain	30	bayes	0.6008	0.3992	0.6953	0.6008	0.65	0.65	0.35	0.2459	0.6022	0.5958	0.4043	0.695	0.5958	0.6506	0.6506	0.3494	0.2402	0.5953
VFI	ReliefF	10	misc	0.586	0.414	0.629	0.586	0.5849	0.5849	0.4151	0.1709	0.5854	0.5745	0.4255	0.6312	0.5745	0.5781	0.5781	0.4219	0.1525	0.5757
NaiveBayesMultinomial	InfoGain	30	bayes	0.6008	0.3992	0.6953	0.6008	0.65	0.65	0.35	0.2459	0.6022	0.5958	0.4043	0.695	0.5958	0.6506	0.6506	0.3494	0.2402	0.5953
NaiveBayesMultinomialUpdateable	InfoGain	30	bayes	0.6008	0.3992	0.6953	0.6008	0.65	0.65	0.35	0.2459	0.6022	0.5958	0.4043	0.695	0.5958	0.6506	0.6506	0.3494	0.2402	0.5953
MultilayerPerceptron	ReliefF	50	functions	0.8481	0.1519	0.8692	0.8481	0.8551	0.8551	0.1449	0.7031	0.8514	0.8617	0.1383	0.8652	0.8617	0.8453	0.8453	0.1548	0.7068	0.8522
LibSVM	InfoGain	30	functions	0.5	0.5	0.6667	0.5	-0.1667	-0.1667	0.6667	-1	0.4	0.5	0.5	0.6667	0.5	0.3334	0.3334	0.6667	-1	0.4
SimpleLogistic	ReliefF	50	functions	0.8468	0.1532	0.8781	0.8468	0.874	0.874	0.126	0.7203	0.858	0.8138	0.1862	0.8511	0.8138	0.8432	0.8432	0.1568	0.6564	0.8255
HyperPipes	ReliefF	10	misc	0.5202	0.4798	0.3746	0.5202	0.5689	0.5689	0.4311	0.0746	0.3279	0.4947	0.5054	0.3404	0.4947	0.4655	0.4655	0.5346	-0.0271	0.2762
VotedPerceptron	ReliefF	50	functions	0.5739	0.4261	0.6935	0.5739	0.6596	0.6596	0.3404	0.2173	0.5605	0.6011	0.399	0.7092	0.6011	0.6845	0.6845	0.3155	0.2731	0.5987
IB1	ReliefF	50	lazy	0.7191	0.2809	0.7814	0.7191	0.7668	0.7668	0.2332	0.4835	0.7327	0.6915	0.3086	0.7518	0.6915	0.7239	0.7239	0.2762	0.414	0.7012
IBk	ReliefF	50	lazy	0.7191	0.2809	0.7814	0.7191	0.7668	0.7668	0.2332	0.4835	0.7327	0.6915	0.3086	0.7518	0.6915	0.7239	0.7239	0.2762	0.414	0.7012
KStar	ReliefF	50	lazy	0.5363	0.4637	0.4642	0.5363	0.5387	0.5387	0.4613	0.075	0.4634	0.5639	0.4362	0.4965	0.5639	0.5653	0.5653	0.4347	0.1291	0.4964
MultiClassClassifier	ReliefF	10	meta	0.8414	0.1586	0.8692	0.8414	0.8593	0.8593	0.1407	0.7005	0.8492	0.8085	0.1915	0.8369	0.8085	0.8194	0.8194	0.1807	0.6278	0.8135
VFI	InfoGain	100*	misc	0.797	0.203	0.7814	0.797	0.7669	0.7669	0.2331	0.5632	0.7704	0.7447	0.2553	0.7163	0.7447	0.7175	0.7175	0.2825	0.4614	0.7086
FilteredClassifier	ReliefF	10	meta	0.8293	0.1707	0.8477	0.8293	0.8284	0.8284	0.1716	0.6577	0.8289	0.7819	0.2181	0.8227	0.7819	0.8083	0.8083	0.1917	0.5896	0.7922
BayesianLogisticRegression	GainRatio	100*	bayes	0.5	0.5	0.3333	0.5	-0.3333	-0.3333	0.8333	-1	0.25	0.5	0.5	0.3333	0.5	0.1667	0.1667	0.8334	-1	0.25
END	ReliefF	10	meta	0.8159	0.1841	0.8333	0.8159	0.8118	0.8118	0.1882	0.6276	0.8137	0.8086	0.1915	0.8227	0.8086	0.7996	0.7996	0.2005	0.608	0.8036
Decorate	ReliefF	10	meta	0.8468	0.1532	0.862	0.8468	0.844	0.844	0.156	0.6908	0.8454	0.8085	0.1915	0.8156	0.8085	0.7923	0.7923	0.2078	0.6005	0.7986
PART	OneR	30	rules	0.8401	0.1599	0.8638	0.8401	0.85	0.85	0.15	0.6899	0.8446	0.8298	0.1702	0.8652	0.8298	0.8607	0.8607	0.1394	0.6897	0.8421
NNge	SymmerU	10	rules	0.8562	0.1438	0.8799	0.8562	0.87	0.87	0.13	0.7261	0.8624	0.8298	0.1702	0.8582	0.8298	0.8458	0.8458	0.1542	0.6754	0.8368
Bagging	SymmerU	30	meta	0.8508	0.1492	0.8781	0.8508	0.8705	0.8705	0.1295	0.721	0.8593	0.8192	0.1809	0.8298	0.8192	0.8072	0.8072	0.1928	0.6262	0.8124
END	SymmerU	30	meta	0.8495	0.1505	0.8728	0.8495	0.8608	0.8608	0.1392	0.7101	0.8546	0.7873	0.2128	0.8227	0.7873	0.8052	0.8052	0.1948	0.5922	0.7948
MultilayerPerceptron	SymmerU	50	functions	0.8602	0.1398	0.8799	0.8602	0.8674	0.8674	0.1326	0.7276	0.8636	0.8458	0.1543	0.8511	0.8458	0.8301	0.8301	0.17	0.6756	0.8366
ZeroR	SymmerU	10	rules	0.5	0.5	0.6667	0.5	-0.1667	-0.1667	0.6667	-1	0.4	0.5	0.5	0.6667	0.5	0.3334	0.3334	0.6667	-1	0.4
FilteredClassifier	ReliefF	100*	meta	0.8078	0.1922	0.8351	0.8078	0.8168	0.8168	0.1832	0.6245	0.8119	0.8192	0.1809	0.8298	0.8192	0.8072	0.8072	0.1928	0.6262	0.8124
LWL	ReliefF	10	lazy	0.8159	0.1841	0.8226	0.8159	0.7996	0.7996	0.2004	0.6153	0.806	0.7872	0.2128	0.7872	0.7872	0.7651	0.7651	0.235	0.5518	0.7715
LWL	ReliefF	100*	lazy	0.8266	0.1734	0.8297	0.8266	0.8075	0.8075	0.1925	0.6339	0.8147	0.7872	0.2128	0.7872	0.7872	0.7651	0.7651	0.235	0.5518	0.7715
LMT	SymmerU	100*	trees	0.832	0.168	0.8656	0.832	0.8594	0.8594	0.1406	0.6908	0.8432	0.8085	0.1915	0.844	0.8085	0.8325	0.8325	0.1676	0.6405	0.8183
LADTree	SymmerU	100*	trees	0.8105	0.1895	0.8387	0.8105	0.8215	0.8215	0.1785	0.6319	0.8155	0.8192	0.1809	0.8369	0.8192	0.8159	0.8159	0.1842	0.635	0.8175
RandomForest	SymmerU	100*	trees	0.8535	0.1465	0.871	0.8535	0.8554	0.8554	0.1446	0.7089	0.8544	0.8404	0.1596	0.8582	0.8404	0.8404	0.8404	0.1596	0.6809	0.8404
NBTree	SymmerU	100*	trees	0.8253	0.1747	0.853	0.8253	0.839	0.839	0.161	0.6641	0.8314	0.7713	0.2287	0.8014	0.7713	0.7775	0.7775	0.2226	0.5487	0.7742
FT	SymmerU	100*	trees	0.8266	0.1734	0.8405	0.8266	0.8193	0.8193	0.1807	0.6458	0.8227	0.8192	0.1809	0.8298	0.8192	0.8072	0.8072	0.1928	0.6262	0.8124
DecisionStump	SymmerU	100*	trees	0.8226	0.1774	0.8262	0.8226	0.8037	0.8037	0.1963	0.626	0.8108	0.7872	0.2128	0.7872	0.7872	0.7651	0.7651	0.235	0.5518	0.7715
J48graft	SymmerU	100*	trees	0.8159	0.1841	0.8477	0.8159	0.8347	0.8347	0.1653	0.6503	0.8239	0.7659	0.2341	0.8014	0.7659	0.7788	0.7788	0.2212	0.5446	0.7716
ConjunctiveRule	ReliefF	30	rules	0.8212	0.1788	0.8118	0.8212	0.7928	0.7928	0.2072	0.6134	0.7998	0.7872	0.2128	0.7872	0.7872	0.7651	0.7651	0.235	0.5518	0.7715
DTNB	ReliefF	50	rules	0.8454	0.1546	0.8638	0.8454	0.8473	0.8473	0.1527	0.6927	0.8464	0.75	0.25	0.773	0.75	0.7451	0.7451	0.255	0.495	0.7474
MultiBoostAB	ReliefF	10	meta	0.8374	0.1626	0.8423	0.8374	0.8206	0.8206	0.1794	0.6578	0.8274	0.7978	0.2022	0.8014	0.7978	0.7782	0.7782	0.2218	0.5758	0.785
LogitBoost	ReliefF	10	meta	0.8441	0.1559	0.8656	0.8441	0.8509	0.8509	0.1491	0.695	0.8473	0.7978	0.2022	0.8227	0.7978	0.8012	0.8012	0.1989	0.599	0.7995
MultiBoostAB	SymmerU	30	meta	0.8481	0.1519	0.8602	0.8481	0.8411	0.8411	0.1589	0.6892	0.8444	0.7873	0.2128	0.8085	0.7873	0.7843	0.7843	0.2158	0.5715	0.7857
REPTree	SymmerU	100*	trees	0.828	0.172	0.8477	0.828	0.8288	0.8288	0.1712	0.6568	0.8284	0.8032	0.1968	0.8369	0.8032	0.8222	0.8222	0.1779	0.6251	0.8112
RandomTree	SymmerU	100*	trees	0.7849	0.2151	0.8047	0.7849	0.7799	0.7799	0.2201	0.5648	0.7823	0.7766	0.2234	0.7943	0.7766	0.7686	0.7686	0.2315	0.5451	0.7721
Dagging	ReliefF	10	meta	0.7137	0.2863	0.7957	0.7137	0.8179	0.8179	0.1821	0.5213	0.7332	0.6596	0.3404	0.7518	0.6596	0.7511	0.7511	0.249	0.4003	0.6706
Bagging	ReliefF	10	meta	0.8387	0.1613	0.853	0.8387	0.8335	0.8335	0.1665	0.6722	0.836	0.8298	0.1702	0.8369	0.8298	0.8149	0.8149	0.1851	0.6444	0.821
VFI	SymmerU	30	misc	0.8118	0.1882	0.8513	0.8118	0.8454	0.8454	0.1546	0.6564	0.8248	0.8032	0.1968	0.8369	0.8032	0.8222	0.8222	0.1779	0.6251	0.8112
VotedPerceptron	SymmerU	50	functions	0.6599	0.3401	0.6846	0.6599	0.652	0.652	0.348	0.3119	0.6548	0.6596	0.3404	0.6525	0.6596	0.6424	0.6424	0.3576	0.3015	0.6383
VotedPerceptron	ReliefF	100*	functions	0.6747	0.3253	0.7545	0.6747	0.7404	0.7404	0.2596	0.4099	0.6871	0.6915	0.3086	0.7801	0.6915	0.8013	0.8013	0.1987	0.4804	0.7083
PART	ReliefF	30	rules	0.8024	0.1976	0.8297	0.8024	0.8103	0.8103	0.1897	0.6127	0.8061	0.8245	0.1755	0.8511	0.8245	0.8359	0.8359	0.1641	0.6602	0.8297
KStar	ReliefF	100*	lazy	0.5	0.5	0.3333	0.5	-0.3333	-0.3333	0.8333	-1	0.25	0.5	0.5	0.3333	0.5	0.1667	0.1667	0.8334	-1	0.25
SimpleLogistic	SymmerU	50	functions	0.8132	0.1868	0.8566	0.8132	0.8571	0.8571	0.1429	0.6688	0.8291	0.8298	0.1702	0.8652	0.8298	0.8607	0.8607	0.1394	0.6897	0.8421
HyperPipes	GainRatio	30	misc	0.5766	0.4234	0.4391	0.5766	0.67	0.67	0.33	0.2282	0.4104	0.5319	0.4681	0.3901	0.5319	0.5911	0.5911	0.409	0.1078	0.35
VFI	GainRatio	30	misc	0.7742	0.2258	0.8244	0.7742	0.8182	0.8182	0.1818	0.5908	0.7892	0.7128	0.2873	0.7801	0.7128	0.7695	0.7695	0.2305	0.4789	0.7275
ADTree	SymmerU	10	trees	0.8522	0.1478	0.8746	0.8522	0.8624	0.8624	0.1376	0.7145	0.8569	0.8192	0.1809	0.8298	0.8192	0.8072	0.8072	0.1928	0.6262	0.8124
RBFNetwork	SymmerU	50	functions	0.8038	0.1962	0.8405	0.8038	0.8288	0.8288	0.1712	0.6321	0.8139	0.7234	0.2766	0.7801	0.7234	0.7611	0.7611	0.2389	0.483	0.7353
NNge	ReliefF	50	rules	0.8172	0.1828	0.8387	0.8172	0.8189	0.8189	0.1811	0.6361	0.8181	0.7926	0.2075	0.8014	0.7926	0.7771	0.7771	0.2229	0.5695	0.7831
NaiveBayes	GainRatio	30	bayes	0.8078	0.1922	0.8477	0.8078	0.8409	0.8409	0.1591	0.6479	0.8205	0.7926	0.2074	0.8298	0.7926	0.8153	0.8153	0.1848	0.6074	0.8018
Bagging	GainRatio	30	meta	0.8427	0.1573	0.8692	0.8427	0.8584	0.8584	0.1416	0.7009	0.8497	0.8032	0.1968	0.8298	0.8032	0.8101	0.8101	0.1899	0.6132	0.8064
Dagging	GainRatio	30	meta	0.7903	0.2097	0.8495	0.7903	0.869	0.869	0.131	0.6547	0.8131	0.8032	0.1968	0.8652	0.8032	0.9023	0.9023	0.0978	0.6985	0.8303
Decorate	GainRatio	30	meta	0.8441	0.1559	0.871	0.8441	0.8609	0.8609	0.1391	0.7048	0.8515	0.7978	0.2022	0.8227	0.7978	0.8012	0.8012	0.1989	0.599	0.7995
END	GainRatio	30	meta	0.8239	0.1761	0.8548	0.8239	0.8432	0.8432	0.1568	0.6669	0.8322	0.8032	0.1968	0.8298	0.8032	0.8101	0.8101	0.1899	0.6132	0.8064
FilteredClassifier	GainRatio	30	meta	0.8172	0.1828	0.8495	0.8172	0.8373	0.8373	0.1627	0.6542	0.8257	0.7819	0.2181	0.8014	0.7819	0.7763	0.7763	0.2237	0.5582	0.7789
LogitBoost	GainRatio	30	meta	0.8441	0.1559	0.871	0.8441	0.8609	0.8609	0.1391	0.7048	0.8515	0.7978	0.2022	0.8298	0.7978	0.8122	0.8122	0.1878	0.61	0.8041
MultiBoostAB	GainRatio	30	meta	0.8441	0.1559	0.8584	0.8441	0.8396	0.8396	0.1604	0.6837	0.8418	0.8086	0.1915	0.8227	0.8086	0.7996	0.7996	0.2005	0.608	0.8036
MultiClassClassifier	GainRatio	30	meta	0.8051	0.1949	0.8441	0.8051	0.8353	0.8353	0.1647	0.6397	0.8169	0.7766	0.2234	0.8227	0.7766	0.8122	0.8122	0.1878	0.5877	0.7895
DTNB	InfoGain	100*	rules	0.8024	0.1976	0.8387	0.8024	0.8262	0.8262	0.1738	0.6281	0.8121	0.8192	0.1809	0.8511	0.8192	0.8391	0.8391	0.1609	0.658	0.8276
REPTree	GainRatio	10	trees	0.8468	0.1532	0.8602	0.8468	0.8414	0.8414	0.1586	0.6882	0.844	0.8138	0.1862	0.8227	0.8138	0.7996	0.7996	0.2005	0.6133	0.8055
ADTree	ReliefF	30	trees	0.7997	0.2003	0.8351	0.7997	0.821	0.821	0.179	0.6203	0.8085	0.7926	0.2074	0.8298	0.7926	0.8153	0.8153	0.1848	0.6074	0.8018
RandomForest	GainRatio	10	trees	0.836	0.164	0.8495	0.836	0.8292	0.8292	0.1708	0.6652	0.8324	0.8139	0.1862	0.8298	0.8139	0.8076	0.8076	0.1924	0.6214	0.8105
NBTree	GainRatio	10	trees	0.8333	0.1667	0.862	0.8333	0.8508	0.8508	0.1492	0.6839	0.841	0.7873	0.2128	0.8298	0.7873	0.819	0.819	0.181	0.6054	0.7993
LMT	GainRatio	10	trees	0.8145	0.1855	0.8602	0.8145	0.865	0.865	0.135	0.6777	0.8322	0.7872	0.2128	0.8156	0.7872	0.7938	0.7938	0.2063	0.5809	0.7903
LADTree	GainRatio	10	trees	0.8253	0.1747	0.8405	0.8253	0.8195	0.8195	0.1805	0.6447	0.8222	0.7819	0.2181	0.7943	0.7819	0.7692	0.7692	0.2309	0.5509	0.7743
J48graft	GainRatio	10	trees	0.8024	0.1976	0.8369	0.8024	0.8227	0.8227	0.1773	0.6248	0.8109	0.8245	0.1755	0.8511	0.8245	0.8359	0.8359	0.1641	0.6602	0.8297
PART	OneR	10	rules	0.832	0.168	0.8638	0.832	0.8555	0.8555	0.1445	0.6871	0.8418	0.8404	0.1596	0.8794	0.8404	0.8843	0.8843	0.1158	0.7234	0.8569
FT	GainRatio	10	trees	0.8347	0.1653	0.8566	0.8347	0.8403	0.8403	0.1597	0.675	0.8374	0.8139	0.1862	0.8369	0.8139	0.8173	0.8173	0.1827	0.6311	0.8155
DecisionStump	GainRatio	10	trees	0.8226	0.1774	0.8262	0.8226	0.8037	0.8037	0.1963	0.626	0.8108	0.7872	0.2128	0.7872	0.7872	0.7651	0.7651	0.235	0.5518	0.7715
RandomTree	OneR	50	trees	0.7742	0.2258	0.7957	0.7742	0.77	0.77	0.23	0.5442	0.772	0.8192	0.1809	0.844	0.8192	0.8264	0.8264	0.1736	0.6455	0.8226
REPTree	OneR	50	trees	0.8414	0.1586	0.8674	0.8414	0.8558	0.8558	0.1442	0.697	0.8478	0.8032	0.1968	0.8369	0.8032	0.8222	0.8222	0.1779	0.6251	0.8112
OneR	OneR	10	rules	0.7702	0.2298	0.8011	0.7702	0.7772	0.7772	0.2228	0.5473	0.7734	0.75	0.25	0.766	0.75	0.7387	0.7387	0.2613	0.4885	0.7432
DecisionStump	OneR	50	trees	0.8226	0.1774	0.8262	0.8226	0.8037	0.8037	0.1963	0.626	0.8108	0.7872	0.2128	0.7872	0.7872	0.7651	0.7651	0.235	0.5518	0.7715
NNge	OneR	10	rules	0.8387	0.1613	0.8674	0.8387	0.8577	0.8577	0.1423	0.6961	0.8469	0.8192	0.1809	0.8582	0.8192	0.8545	0.8545	0.1456	0.6727	0.8327
J48	OneR	50	trees	0.797	0.203	0.819	0.797	0.7963	0.7963	0.2037	0.5933	0.7966	0.8139	0.1862	0.8298	0.8139	0.8076	0.8076	0.1924	0.6214	0.8105
J48graft	OneR	50	trees	0.828	0.172	0.8548	0.828	0.8407	0.8407	0.1593	0.6685	0.8337	0.8032	0.1968	0.8227	0.8032	0.8001	0.8001	0.1999	0.6033	0.8016
LADTree	OneR	50	trees	0.8159	0.1841	0.8387	0.8159	0.8194	0.8194	0.1806	0.6352	0.8176	0.8032	0.1968	0.8298	0.8032	0.8101	0.8101	0.1899	0.6132	0.8064
LMT	OneR	50	trees	0.8024	0.1976	0.8387	0.8024	0.8262	0.8262	0.1738	0.6281	0.8121	0.867	0.133	0.8936	0.867	0.89	0.89	0.11	0.7566	0.8769
NBTree	OneR	50	trees	0.8293	0.1707	0.8513	0.8293	0.8339	0.8339	0.1661	0.6632	0.8315	0.7554	0.2447	0.7801	0.7554	0.7527	0.7527	0.2473	0.508	0.754
RandomForest	OneR	50	trees	0.8522	0.1478	0.8763	0.8522	0.8658	0.8658	0.1342	0.7178	0.8583	0.8351	0.1649	0.8511	0.8351	0.8317	0.8317	0.1684	0.6668	0.8333
NaiveBayes	SymmerU	100*	bayes	0.8118	0.1882	0.8477	0.8118	0.8376	0.8376	0.1624	0.6489	0.8223	0.7979	0.2021	0.8369	0.7979	0.8258	0.8258	0.1743	0.623	0.8089
DecisionTable	OneR	10	rules	0.8105	0.1895	0.8423	0.8105	0.8279	0.8279	0.1721	0.6381	0.818	0.8298	0.1702	0.8582	0.8298	0.8458	0.8458	0.1542	0.6754	0.8368
PART	InfoGain	100*	rules	0.7823	0.2177	0.8065	0.7823	0.7823	0.7823	0.2177	0.5645	0.7823	0.8192	0.1809	0.8298	0.8192	0.8072	0.8072	0.1928	0.6262	0.8124
BayesianLogisticRegression	SymmerU	100*	bayes	0.5	0.5	0.3333	0.5	-0.3333	-0.3333	0.8333	-1	0.25	0.5	0.5	0.3333	0.5	0.1667	0.1667	0.8334	-1	0.25
BayesNet	SymmerU	50	bayes	0.8468	0.1532	0.871	0.8468	0.8591	0.8591	0.1409	0.7058	0.8524	0.8139	0.1862	0.8298	0.8139	0.8076	0.8076	0.1924	0.6214	0.8105
BayesianLogisticRegression	SymmerU	50	bayes	0.5188	0.4812	0.3763	0.5188	0.5576	0.5576	0.4424	0.0658	0.3332	0.516	0.4841	0.3759	0.516	0.5456	0.5456	0.4545	0.0539	0.3349
DecisionTable	ReliefF	50	rules	0.797	0.203	0.8262	0.797	0.8066	0.8066	0.1934	0.6036	0.8014	0.7978	0.2022	0.8298	0.7978	0.8122	0.8122	0.1878	0.61	0.8041
NaiveBayes	SymmerU	50	bayes	0.8105	0.1895	0.8548	0.8105	0.8556	0.8556	0.1444	0.6645	0.8267	0.8032	0.1968	0.844	0.8032	0.8367	0.8367	0.1633	0.639	0.816
NaiveBayesMultinomialUpdateable	SymmerU	50	bayes	0.6169	0.3831	0.7061	0.6169	0.6665	0.6665	0.3335	0.2791	0.6213	0.5958	0.4043	0.695	0.5958	0.6506	0.6506	0.3494	0.2402	0.5953
NaiveBayesMultinomial	SymmerU	50	bayes	0.6169	0.3831	0.7061	0.6169	0.6665	0.6665	0.3335	0.2791	0.6213	0.5958	0.4043	0.695	0.5958	0.6506	0.6506	0.3494	0.2402	0.5953
DMNBtext	SymmerU	50	bayes	0.8266	0.1734	0.862	0.8266	0.8562	0.8562	0.1438	0.6822	0.8385	0.7819	0.2181	0.8227	0.7819	0.8083	0.8083	0.1917	0.5896	0.7922
NaiveBayesMultinomialUpdateable	OneR	30	bayes	0.7742	0.2258	0.8172	0.7742	0.8025	0.8025	0.1975	0.576	0.785	0.7553	0.2447	0.8014	0.7553	0.7836	0.7836	0.2165	0.5381	0.7657
LWL	ReliefF	50	lazy	0.8239	0.1761	0.828	0.8239	0.8056	0.8056	0.1944	0.6292	0.8125	0.7872	0.2128	0.7872	0.7872	0.7651	0.7651	0.235	0.5518	0.7715
IBk	OneR	30	lazy	0.8078	0.1922	0.8387	0.8078	0.8229	0.8229	0.1771	0.6305	0.8144	0.7022	0.2979	0.7447	0.7022	0.7119	0.7119	0.2881	0.4139	0.7063
LibSVM	SymmerU	50	functions	0.5	0.5	0.6667	0.5	-0.1667	-0.1667	0.6667	-1	0.4	0.5	0.5	0.6667	0.5	0.3334	0.3334	0.6667	-1	0.4
ComplementNaiveBayes	OneR	30	bayes	0.7715	0.2285	0.8154	0.7715	0.8007	0.8007	0.1993	0.5715	0.7825	0.7553	0.2447	0.8014	0.7553	0.7836	0.7836	0.2165	0.5381	0.7657
NaiveBayesMultinomialUpdateable	GainRatio	100*	bayes	0.7433	0.2567	0.7724	0.7433	0.7439	0.7439	0.2561	0.4872	0.7436	0.7074	0.2925	0.7305	0.7074	0.6997	0.6997	0.3004	0.407	0.7029
DMNBtext	OneR	30	bayes	0.8051	0.1949	0.8459	0.8051	0.8393	0.8393	0.1607	0.6435	0.8181	0.7713	0.2287	0.8085	0.7713	0.7883	0.7883	0.2118	0.5593	0.7784
NaiveBayesMultinomial	GainRatio	100*	bayes	0.7433	0.2567	0.7724	0.7433	0.7439	0.7439	0.2561	0.4872	0.7436	0.7074	0.2925	0.7305	0.7074	0.6997	0.6997	0.3004	0.407	0.7029
Bagging	ReliefF	100*	meta	0.8306	0.1694	0.8602	0.8306	0.8492	0.8492	0.1508	0.6796	0.8386	0.8192	0.1809	0.8298	0.8192	0.8072	0.8072	0.1928	0.6262	0.8124
DMNBtext	GainRatio	100*	bayes	0.8011	0.1989	0.8459	0.8011	0.8433	0.8433	0.1567	0.643	0.8163	0.7819	0.2181	0.8298	0.7819	0.8237	0.8237	0.1764	0.6041	0.7966
Dagging	ReliefF	100*	meta	0.8508	0.1492	0.8728	0.8508	0.8599	0.8599	0.1401	0.7107	0.8551	0.8298	0.1702	0.8582	0.8298	0.8458	0.8458	0.1542	0.6754	0.8368
Ridor	ReliefF	50	rules	0.8132	0.1868	0.8459	0.8132	0.833	0.833	0.167	0.6459	0.8216	0.7978	0.2022	0.8227	0.7978	0.8012	0.8012	0.1989	0.599	0.7995
DMNBtext	GainRatio	10	bayes	0.6384	0.3616	0.7419	0.6384	0.7505	0.7505	0.2495	0.3724	0.6446	0.6117	0.3883	0.695	0.6117	0.6482	0.6482	0.3518	0.2573	0.6159
OneR	ReliefF	50	rules	0.8065	0.1935	0.8262	0.8065	0.804	0.804	0.196	0.6105	0.8052	0.75	0.25	0.766	0.75	0.7387	0.7387	0.2613	0.4885	0.7432
ADTree	OneR	30	trees	0.836	0.164	0.8602	0.836	0.8458	0.8458	0.1542	0.6818	0.8405	0.8351	0.1649	0.8511	0.8351	0.8317	0.8317	0.1684	0.6668	0.8333
BFTree	OneR	30	trees	0.8253	0.1747	0.8566	0.8253	0.8459	0.8459	0.1541	0.6708	0.834	0.8458	0.1543	0.8652	0.8458	0.8495	0.8495	0.1505	0.6953	0.8476
Ridor	OneR	30	rules	0.8253	0.1747	0.853	0.8253	0.839	0.839	0.161	0.6641	0.8314	0.8192	0.1809	0.8369	0.8192	0.8159	0.8159	0.1842	0.635	0.8175
ZeroR	OneR	30	rules	0.5	0.5	0.6667	0.5	-0.1667	-0.1667	0.6667	-1	0.4	0.5	0.5	0.6667	0.5	0.3334	0.3334	0.6667	-1	0.4
OneR	OneR	30	rules	0.7702	0.2298	0.8011	0.7702	0.7772	0.7772	0.2228	0.5473	0.7734	0.75	0.25	0.766	0.75	0.7387	0.7387	0.2613	0.4885	0.7432
PART	ReliefF	50	rules	0.793	0.207	0.828	0.793	0.8116	0.8116	0.1884	0.6043	0.8008	0.7979	0.2021	0.8156	0.7979	0.792	0.792	0.2081	0.5898	0.7947
DTNB	OneR	30	rules	0.8575	0.1425	0.8746	0.8575	0.8595	0.8595	0.1405	0.717	0.8585	0.8245	0.1756	0.8582	0.8245	0.8497	0.8497	0.1503	0.6736	0.8348
NNge	OneR	30	rules	0.8454	0.1546	0.8584	0.8454	0.8393	0.8393	0.1607	0.6847	0.8422	0.8086	0.1915	0.8227	0.8086	0.7996	0.7996	0.2005	0.608	0.8036
ConjunctiveRule	OneR	30	rules	0.8132	0.1868	0.8226	0.8132	0.7994	0.7994	0.2006	0.6125	0.8051	0.7872	0.2128	0.7872	0.7872	0.7651	0.7651	0.235	0.5518	0.7715
DecisionTable	OneR	30	rules	0.7836	0.2164	0.8136	0.7836	0.7919	0.7919	0.2081	0.5754	0.7874	0.8192	0.1809	0.8369	0.8192	0.8159	0.8159	0.1842	0.635	0.8175
Dagging	ReliefF	50	meta	0.8253	0.1747	0.862	0.8253	0.8575	0.8575	0.1425	0.682	0.8379	0.7978	0.2022	0.8227	0.7978	0.8012	0.8012	0.1989	0.599	0.7995
Bagging	ReliefF	50	meta	0.8239	0.1761	0.8405	0.8239	0.8197	0.8197	0.1803	0.6437	0.8217	0.8138	0.1862	0.8227	0.8138	0.7996	0.7996	0.2005	0.6133	0.8055
DecisionTable	ReliefF	100*	rules	0.8199	0.1801	0.8405	0.8199	0.8208	0.8208	0.1792	0.6407	0.8203	0.8032	0.1968	0.8227	0.8032	0.8001	0.8001	0.1999	0.6033	0.8016
Decorate	ReliefF	50	meta	0.8266	0.1734	0.8477	0.8266	0.8293	0.8293	0.1707	0.6559	0.8279	0.8085	0.1915	0.8156	0.8085	0.7923	0.7923	0.2078	0.6005	0.7986
LogitBoost	ReliefF	50	meta	0.832	0.168	0.8566	0.832	0.8417	0.8417	0.1583	0.6736	0.8365	0.7607	0.2394	0.7943	0.7607	0.7698	0.7698	0.2302	0.5304	0.7648
Ridor	ReliefF	100*	rules	0.797	0.203	0.8297	0.797	0.8126	0.8126	0.1874	0.6095	0.8038	0.8298	0.1702	0.8298	0.8298	0.808	0.808	0.192	0.6374	0.8157
MultiClassClassifier	ReliefF	50	meta	0.8333	0.1667	0.8584	0.8333	0.8441	0.8441	0.1559	0.6774	0.8383	0.7873	0.2128	0.8227	0.7873	0.8052	0.8052	0.1948	0.5922	0.7948
OneR	ReliefF	100*	rules	0.8065	0.1935	0.8262	0.8065	0.804	0.804	0.196	0.6105	0.8052	0.75	0.25	0.766	0.75	0.7387	0.7387	0.2613	0.4885	0.7432
VFI	ReliefF	50	misc	0.6922	0.3078	0.7186	0.6922	0.6862	0.6862	0.3138	0.3783	0.6887	0.6224	0.3777	0.6738	0.6224	0.6283	0.6283	0.3718	0.2505	0.6246
HyperPipes	ReliefF	50	misc	0.586	0.414	0.4803	0.586	0.6146	0.6146	0.3854	0.1986	0.4725	0.5054	0.4947	0.3901	0.5054	0.509	0.509	0.4911	0.0138	0.3702
BFTree	ReliefF	100*	trees	0.8172	0.1828	0.8405	0.8172	0.8216	0.8216	0.1784	0.6388	0.8193	0.8138	0.1862	0.8227	0.8138	0.7996	0.7996	0.2005	0.6133	0.8055
Logistic	GainRatio	10	functions	0.8226	0.1774	0.8674	0.8226	0.8744	0.8744	0.1256	0.695	0.8408	0.7713	0.2288	0.8227	0.7713	0.8171	0.8171	0.1829	0.5866	0.7866
J48graft	OneR	10	trees	0.8548	0.1452	0.8746	0.8548	0.8608	0.8608	0.1392	0.7157	0.8577	0.8245	0.1755	0.844	0.8245	0.8245	0.8245	0.1755	0.6489	0.8245
DMNBtext	ReliefF	100*	bayes	0.6358	0.3642	0.7115	0.6358	0.6716	0.6716	0.3284	0.3053	0.6426	0.6756	0.3245	0.7518	0.6756	0.7329	0.7329	0.2671	0.4044	0.6874
ComplementNaiveBayes	ReliefF	100*	bayes	0.7392	0.2608	0.7204	0.7392	0.7131	0.7131	0.2869	0.4516	0.71	0.7766	0.2234	0.7589	0.7766	0.7474	0.7474	0.2527	0.5231	0.7482
NaiveBayesMultinomialUpdateable	ReliefF	100*	bayes	0.7392	0.2608	0.7204	0.7392	0.7131	0.7131	0.2869	0.4516	0.71	0.7766	0.2234	0.7589	0.7766	0.7474	0.7474	0.2527	0.5231	0.7482
NaiveBayesMultinomial	ReliefF	100*	bayes	0.7392	0.2608	0.7204	0.7392	0.7131	0.7131	0.2869	0.4516	0.71	0.7766	0.2234	0.7589	0.7766	0.7474	0.7474	0.2527	0.5231	0.7482
Logistic	ReliefF	100*	functions	0.7823	0.2177	0.8011	0.7823	0.7759	0.7759	0.2241	0.5581	0.7788	0.7713	0.2288	0.7943	0.7713	0.7685	0.7685	0.2315	0.5398	0.7698
OneR	GainRatio	10	rules	0.7702	0.2298	0.8011	0.7702	0.7772	0.7772	0.2228	0.5473	0.7734	0.75	0.25	0.766	0.75	0.7387	0.7387	0.2613	0.4885	0.7432
BayesNet	ReliefF	100*	bayes	0.8656	0.1344	0.8817	0.8656	0.8676	0.8676	0.1324	0.7332	0.8666	0.8032	0.1969	0.8085	0.8032	0.7852	0.7852	0.2149	0.588	0.7917
BayesianLogisticRegression	ReliefF	100*	bayes	0.5	0.5	0.3333	0.5	-0.3333	-0.3333	0.8333	-1	0.25	0.5	0.5	0.3333	0.5	0.1667	0.1667	0.8334	-1	0.25
FT	OneR	10	trees	0.8495	0.1505	0.8746	0.8495	0.8642	0.8642	0.1358	0.7135	0.8561	0.7873	0.2128	0.8014	0.7873	0.7765	0.7765	0.2235	0.5636	0.7811
LibSVM	ReliefF	100*	functions	0.5	0.5	0.6667	0.5	-0.1667	-0.1667	0.6667	-1	0.4	0.5	0.5	0.6667	0.5	0.3334	0.3334	0.6667	-1	0.4
RandomTree	GainRatio	10	trees	0.7944	0.2056	0.8208	0.7944	0.7993	0.7993	0.2007	0.5937	0.7967	0.7553	0.2447	0.766	0.7553	0.7401	0.7401	0.2599	0.4952	0.7455
J48	SymmerU	100*	trees	0.8051	0.1949	0.8315	0.8051	0.8121	0.8121	0.1879	0.6172	0.8084	0.7607	0.2394	0.7943	0.7607	0.7698	0.7698	0.2302	0.5304	0.7648
J48	SymmerU	10	trees	0.8495	0.1505	0.8692	0.8495	0.8544	0.8544	0.1456	0.7038	0.8518	0.8139	0.1862	0.8369	0.8139	0.8173	0.8173	0.1827	0.6311	0.8155
J48graft	SymmerU	10	trees	0.8616	0.1384	0.8781	0.8616	0.8635	0.8635	0.1365	0.7251	0.8625	0.8139	0.1862	0.8369	0.8139	0.8173	0.8173	0.1827	0.6311	0.8155
DecisionStump	SymmerU	10	trees	0.8226	0.1774	0.8262	0.8226	0.8037	0.8037	0.1963	0.626	0.8108	0.7872	0.2128	0.7872	0.7872	0.7651	0.7651	0.235	0.5518	0.7715
FT	SymmerU	10	trees	0.8374	0.1626	0.8638	0.8374	0.8516	0.8516	0.1484	0.6888	0.8437	0.8458	0.1543	0.8582	0.8458	0.8389	0.8389	0.1612	0.6846	0.8421
NBTree	SymmerU	10	trees	0.8414	0.1586	0.871	0.8414	0.863	0.863	0.137	0.7041	0.8506	0.8139	0.1862	0.8298	0.8139	0.8076	0.8076	0.1924	0.6214	0.8105
RandomForest	SymmerU	10	trees	0.8468	0.1532	0.8656	0.8468	0.8496	0.8496	0.1504	0.6964	0.8482	0.8458	0.1543	0.8511	0.8458	0.8301	0.8301	0.17	0.6756	0.8366
LADTree	SymmerU	10	trees	0.8548	0.1452	0.8728	0.8548	0.8578	0.8578	0.1422	0.7126	0.8563	0.8351	0.1649	0.8511	0.8351	0.8317	0.8317	0.1684	0.6668	0.8333
LMT	SymmerU	10	trees	0.8347	0.1653	0.8728	0.8347	0.8737	0.8737	0.1263	0.7073	0.8496	0.8244	0.1755	0.8652	0.8244	0.8663	0.8663	0.1337	0.6895	0.8401
RandomTree	SymmerU	10	trees	0.7863	0.2137	0.8136	0.7863	0.7911	0.7911	0.2089	0.5774	0.7886	0.8351	0.1649	0.8511	0.8351	0.8317	0.8317	0.1684	0.6668	0.8333
REPTree	SymmerU	10	trees	0.8212	0.1788	0.8441	0.8212	0.8257	0.8257	0.1743	0.647	0.8234	0.8245	0.1756	0.8582	0.8245	0.8497	0.8497	0.1503	0.6736	0.8348
NaiveBayes	ReliefF	50	bayes	0.7944	0.2056	0.8172	0.7944	0.7944	0.7944	0.2056	0.5887	0.7944	0.7181	0.2819	0.7447	0.7181	0.7137	0.7137	0.2863	0.4318	0.7158
DTNB	GainRatio	10	rules	0.828	0.172	0.8638	0.828	0.8591	0.8591	0.1409	0.6863	0.8403	0.8298	0.1702	0.8652	0.8298	0.8607	0.8607	0.1394	0.6897	0.8421
VotedPerceptron	InfoGain	100*	functions	0.7325	0.2675	0.8011	0.7325	0.8043	0.8043	0.1957	0.532	0.7506	0.7075	0.2926	0.766	0.7075	0.7425	0.7425	0.2576	0.4485	0.7183
DTNB	GainRatio	100*	rules	0.8132	0.1868	0.8441	0.8132	0.8296	0.8296	0.1704	0.6426	0.8203	0.8192	0.1809	0.8511	0.8192	0.8391	0.8391	0.1609	0.658	0.8276
J48	GainRatio	10	trees	0.793	0.207	0.8297	0.793	0.8149	0.8149	0.1851	0.6075	0.802	0.8192	0.1809	0.8511	0.8192	0.8391	0.8391	0.1609	0.658	0.8276
OneR	GainRatio	30	rules	0.7702	0.2298	0.8011	0.7702	0.7772	0.7772	0.2228	0.5473	0.7734	0.75	0.25	0.766	0.75	0.7387	0.7387	0.2613	0.4885	0.7432
Bagging	OneR	10	meta	0.8427	0.1573	0.871	0.8427	0.862	0.862	0.138	0.7044	0.8511	0.8139	0.1862	0.844	0.8139	0.829	0.829	0.171	0.6427	0.8205
END	ReliefF	30	meta	0.7917	0.2083	0.8226	0.7917	0.803	0.803	0.197	0.5946	0.7967	0.8404	0.1596	0.8511	0.8404	0.8306	0.8306	0.1695	0.6709	0.835
Bagging	ReliefF	30	meta	0.836	0.164	0.8495	0.836	0.8292	0.8292	0.1708	0.6652	0.8324	0.8192	0.1809	0.8298	0.8192	0.8072	0.8072	0.1928	0.6262	0.8124
END	OneR	10	meta	0.8481	0.1519	0.8674	0.8481	0.852	0.852	0.148	0.7001	0.85	0.8245	0.1755	0.844	0.8245	0.8245	0.8245	0.1755	0.6489	0.8245
FilteredClassifier	OneR	10	meta	0.8347	0.1653	0.8674	0.8347	0.861	0.861	0.139	0.6952	0.8455	0.8032	0.1968	0.8298	0.8032	0.8101	0.8101	0.1899	0.6132	0.8064
MultiClassClassifier	ReliefF	30	meta	0.8508	0.1492	0.8746	0.8508	0.8633	0.8633	0.1367	0.714	0.8565	0.8192	0.1809	0.8511	0.8192	0.8391	0.8391	0.1609	0.658	0.8276
FilteredClassifier	ReliefF	30	meta	0.8038	0.1962	0.8315	0.8038	0.8126	0.8126	0.1874	0.6163	0.8078	0.8192	0.1809	0.8298	0.8192	0.8072	0.8072	0.1928	0.6262	0.8124
MultiClassClassifier	OneR	10	meta	0.8387	0.1613	0.8799	0.8387	0.8879	0.8879	0.1121	0.7249	0.8566	0.8244	0.1755	0.8652	0.8244	0.8663	0.8663	0.1337	0.6895	0.8401
HyperPipes	OneR	10	misc	0.5591	0.4409	0.4194	0.5591	0.6456	0.6456	0.3544	0.1856	0.386	0.516	0.4841	0.3688	0.516	0.5594	0.5594	0.4407	0.0615	0.3194
SimpleLogistic	GainRatio	100*	functions	0.8078	0.1922	0.8477	0.8078	0.8409	0.8409	0.1591	0.6479	0.8205	0.8192	0.1809	0.8582	0.8192	0.8545	0.8545	0.1456	0.6727	0.8327
HyperPipes	ReliefF	30	misc	0.543	0.457	0.4211	0.543	0.5755	0.5755	0.4245	0.114	0.4007	0.5	0.5	0.3759	0.5	0.5	0.5	0.5	0	0.3484
MultilayerPerceptron	GainRatio	100*	functions	0.8011	0.1989	0.8387	0.8011	0.8271	0.8271	0.1729	0.6277	0.8115	0.8192	0.1809	0.8298	0.8192	0.8072	0.8072	0.1928	0.6262	0.8124
KStar	GainRatio	100*	lazy	0.6438	0.3562	0.7419	0.6438	0.7406	0.7406	0.2594	0.372	0.6517	0.6383	0.3617	0.7447	0.6383	0.7636	0.7636	0.2364	0.3819	0.6439
NaiveBayes	GainRatio	100*	bayes	0.8239	0.1761	0.8423	0.8239	0.8222	0.8222	0.1778	0.6461	0.8231	0.7978	0.2022	0.8227	0.7978	0.8012	0.8012	0.1989	0.599	0.7995
IB1	GainRatio	100*	lazy	0.7191	0.2809	0.7832	0.7191	0.771	0.771	0.229	0.4873	0.7334	0.7394	0.2606	0.7943	0.7394	0.7797	0.7797	0.2203	0.5175	0.7524
VotedPerceptron	GainRatio	100*	functions	0.6935	0.3065	0.7599	0.6935	0.7382	0.7382	0.2618	0.4294	0.7053	0.6756	0.3245	0.7376	0.6756	0.7051	0.7051	0.2949	0.3795	0.6842
RBFNetwork	GainRatio	30	functions	0.793	0.207	0.8369	0.793	0.8299	0.8299	0.1701	0.6218	0.8066	0.7234	0.2766	0.8014	0.7234	0.8207	0.8207	0.1793	0.5353	0.7435
MultilayerPerceptron	GainRatio	30	functions	0.832	0.168	0.8674	0.832	0.8635	0.8635	0.1365	0.6947	0.8445	0.8032	0.1968	0.8298	0.8032	0.8101	0.8101	0.1899	0.6132	0.8064
SPegasos	GainRatio	30	functions	0.5	0.5	0.6667	0.5	-0.1667	-0.1667	0.6667	-1	0.4	0.5	0.5	0.6667	0.5	0.3334	0.3334	0.6667	-1	0.4
SimpleLogistic	GainRatio	30	functions	0.793	0.207	0.8387	0.793	0.8341	0.8341	0.1659	0.6258	0.8077	0.7873	0.2128	0.8298	0.7873	0.819	0.819	0.181	0.6054	0.7993
REPTree	InfoGain	30	trees	0.8374	0.1626	0.862	0.8374	0.8483	0.8483	0.1517	0.6856	0.8424	0.8032	0.1968	0.8369	0.8032	0.8222	0.8222	0.1779	0.6251	0.8112
RandomTree	InfoGain	30	trees	0.7728	0.2272	0.8065	0.7728	0.7844	0.7844	0.2156	0.5571	0.7779	0.7766	0.2234	0.7943	0.7766	0.7686	0.7686	0.2315	0.5451	0.7721
KStar	GainRatio	30	lazy	0.7581	0.2419	0.8172	0.7581	0.8175	0.8175	0.1825	0.5725	0.7757	0.7075	0.2926	0.766	0.7075	0.7425	0.7425	0.2576	0.4485	0.7183
IBk	GainRatio	30	lazy	0.7339	0.2661	0.7796	0.7339	0.7551	0.7551	0.2449	0.4885	0.742	0.7234	0.2766	0.7518	0.7234	0.7211	0.7211	0.2789	0.4445	0.7222
LMT	InfoGain	30	trees	0.8293	0.1707	0.8674	0.8293	0.8662	0.8662	0.1338	0.6945	0.8435	0.8298	0.1703	0.8723	0.8298	0.8787	0.8787	0.1214	0.7067	0.8474
LWL	GainRatio	30	lazy	0.8239	0.1761	0.828	0.8239	0.8056	0.8056	0.1944	0.6292	0.8125	0.7872	0.2128	0.7872	0.7872	0.7651	0.7651	0.235	0.5518	0.7715
RandomForest	InfoGain	30	trees	0.8508	0.1492	0.8674	0.8508	0.8508	0.8508	0.1492	0.7016	0.8508	0.8724	0.1276	0.8865	0.8724	0.8724	0.8724	0.1276	0.7447	0.8724
NBTree	InfoGain	30	trees	0.8401	0.1599	0.8584	0.8401	0.841	0.841	0.159	0.681	0.8405	0.8032	0.1968	0.8227	0.8032	0.8001	0.8001	0.1999	0.6033	0.8016
FT	InfoGain	30	trees	0.8239	0.1761	0.8495	0.8239	0.8334	0.8334	0.1666	0.6572	0.8283	0.8458	0.1543	0.8652	0.8458	0.8495	0.8495	0.1505	0.6953	0.8476
DecisionStump	InfoGain	30	trees	0.8226	0.1774	0.8262	0.8226	0.8037	0.8037	0.1963	0.626	0.8108	0.7872	0.2128	0.7872	0.7872	0.7651	0.7651	0.235	0.5518	0.7715
J48graft	InfoGain	30	trees	0.8481	0.1519	0.871	0.8481	0.8583	0.8583	0.1417	0.7063	0.8528	0.8086	0.1915	0.8227	0.8086	0.7996	0.7996	0.2005	0.608	0.8036
J48	InfoGain	30	trees	0.8401	0.1599	0.8638	0.8401	0.85	0.85	0.15	0.6899	0.8446	0.7979	0.2021	0.8156	0.7979	0.792	0.792	0.2081	0.5898	0.7947
LogitBoost	GainRatio	100*	meta	0.8495	0.1505	0.8746	0.8495	0.8642	0.8642	0.1358	0.7135	0.8561	0.8139	0.1862	0.8298	0.8139	0.8076	0.8076	0.1924	0.6214	0.8105
Ridor	GainRatio	10	rules	0.8159	0.1841	0.8441	0.8159	0.8281	0.8281	0.1719	0.6439	0.8214	0.7978	0.2022	0.8014	0.7978	0.7782	0.7782	0.2218	0.5758	0.785
MultiClassClassifier	GainRatio	100*	meta	0.7782	0.2218	0.8011	0.7782	0.776	0.776	0.224	0.5543	0.7771	0.7713	0.2287	0.8085	0.7713	0.7883	0.7883	0.2118	0.5593	0.7784
FilteredClassifier	GainRatio	100*	meta	0.8132	0.1868	0.8369	0.8132	0.8176	0.8176	0.1824	0.6307	0.8153	0.7766	0.2234	0.8014	0.7766	0.7766	0.7766	0.2234	0.5532	0.7766
PART	GainRatio	10	rules	0.8226	0.1774	0.8423	0.8226	0.8226	0.8226	0.1774	0.6452	0.8226	0.7766	0.2234	0.8298	0.7766	0.8294	0.8294	0.1706	0.6037	0.7937
ADTree	OneR	100*	trees	0.8253	0.1747	0.8495	0.8253	0.8327	0.8327	0.1673	0.658	0.8288	0.7979	0.2021	0.8156	0.7979	0.792	0.792	0.2081	0.5898	0.7947
BFTree	OneR	100*	trees	0.8132	0.1868	0.8405	0.8132	0.8233	0.8233	0.1767	0.6364	0.8178	0.75	0.25	0.7943	0.75	0.7734	0.7734	0.2266	0.5229	0.759
FT	OneR	50	trees	0.8266	0.1734	0.853	0.8266	0.8382	0.8382	0.1618	0.6647	0.8319	0.8298	0.1702	0.8369	0.8298	0.8149	0.8149	0.1851	0.6444	0.821
OneR	OneR	100*	rules	0.7702	0.2298	0.8011	0.7702	0.7772	0.7772	0.2228	0.5473	0.7734	0.75	0.25	0.766	0.75	0.7387	0.7387	0.2613	0.4885	0.7432
PART	OneR	100*	rules	0.8132	0.1868	0.8315	0.8132	0.8099	0.8099	0.1901	0.6231	0.8115	0.7766	0.2234	0.7943	0.7766	0.7686	0.7686	0.2315	0.5451	0.7721
Ridor	OneR	100*	rules	0.8118	0.1882	0.8423	0.8118	0.8271	0.8271	0.1729	0.6388	0.8185	0.7553	0.2447	0.8014	0.7553	0.7836	0.7836	0.2165	0.5381	0.7657
DecisionStump	SymmerU	30	trees	0.8226	0.1774	0.8262	0.8226	0.8037	0.8037	0.1963	0.626	0.8108	0.7872	0.2128	0.7872	0.7872	0.7651	0.7651	0.235	0.5518	0.7715
ConjunctiveRule	OneR	100*	rules	0.8132	0.1868	0.8226	0.8132	0.7994	0.7994	0.2006	0.6125	0.8051	0.7872	0.2128	0.7872	0.7872	0.7651	0.7651	0.235	0.5518	0.7715
DecisionTable	OneR	100*	rules	0.8091	0.1909	0.8351	0.8091	0.8162	0.8162	0.1838	0.6253	0.8125	0.8139	0.1862	0.844	0.8139	0.829	0.829	0.171	0.6427	0.8205
KStar	InfoGain	100*	lazy	0.7272	0.2728	0.7455	0.7272	0.7168	0.7168	0.2832	0.4438	0.7208	0.6862	0.3138	0.7163	0.6862	0.6825	0.6825	0.3176	0.3686	0.6841
NNge	OneR	100*	rules	0.8427	0.1573	0.8369	0.8427	0.8165	0.8165	0.1835	0.6587	0.8248	0.8138	0.1862	0.8156	0.8138	0.7931	0.7931	0.2069	0.6066	0.8004
LWL	SymmerU	100*	lazy	0.8266	0.1734	0.8297	0.8266	0.8075	0.8075	0.1925	0.6339	0.8147	0.7872	0.2128	0.7872	0.7872	0.7651	0.7651	0.235	0.5518	0.7715
AdaBoostM1	SymmerU	100*	meta	0.8522	0.1478	0.8763	0.8522	0.8658	0.8658	0.1342	0.7178	0.8583	0.7447	0.2553	0.7589	0.7447	0.7318	0.7318	0.2683	0.4763	0.7366
Bagging	GainRatio	100*	meta	0.8468	0.1532	0.8763	0.8468	0.87	0.87	0.13	0.7164	0.8566	0.8086	0.1915	0.8227	0.8086	0.7996	0.7996	0.2005	0.608	0.8036
SimpleLogistic	SymmerU	100*	functions	0.832	0.168	0.8656	0.832	0.8594	0.8594	0.1406	0.6908	0.8432	0.8085	0.1915	0.844	0.8085	0.8325	0.8325	0.1676	0.6405	0.8183
SPegasos	SymmerU	100*	functions	0.5	0.5	0.6667	0.5	-0.1667	-0.1667	0.6667	-1	0.4	0.5	0.5	0.6667	0.5	0.3334	0.3334	0.6667	-1	0.4
MultilayerPerceptron	SymmerU	100*	functions	0.8522	0.1478	0.871	0.8522	0.8561	0.8561	0.1439	0.7082	0.854	0.8351	0.1649	0.8511	0.8351	0.8317	0.8317	0.1684	0.6668	0.8333
Dagging	GainRatio	100*	meta	0.8266	0.1734	0.8638	0.8266	0.8604	0.8604	0.1396	0.6861	0.8398	0.8405	0.1596	0.8723	0.8405	0.8669	0.8669	0.1332	0.7068	0.8514
IBk	SymmerU	100*	lazy	0.7755	0.2245	0.8208	0.7755	0.8089	0.8089	0.1911	0.5835	0.7878	0.7659	0.2341	0.8014	0.7659	0.7788	0.7788	0.2212	0.5446	0.7716
KStar	SymmerU	100*	lazy	0.7352	0.2648	0.8011	0.7352	0.8007	0.8007	0.1993	0.5319	0.7526	0.7287	0.2713	0.7943	0.7287	0.7897	0.7897	0.2103	0.5148	0.745
VotedPerceptron	SymmerU	100*	functions	0.6505	0.3495	0.7168	0.6505	0.678	0.678	0.322	0.3274	0.6577	0.6223	0.3777	0.6879	0.6223	0.6405	0.6405	0.3596	0.2622	0.627
IB1	SymmerU	100*	lazy	0.7755	0.2245	0.8208	0.7755	0.8089	0.8089	0.1911	0.5835	0.7878	0.7659	0.2341	0.8014	0.7659	0.7788	0.7788	0.2212	0.5446	0.7716
AdaBoostM1	InfoGain	10	meta	0.8401	0.1599	0.862	0.8401	0.8468	0.8468	0.1532	0.6868	0.8433	0.8085	0.1915	0.8298	0.8085	0.8085	0.8085	0.1915	0.617	0.8085
LWL	InfoGain	10	lazy	0.8293	0.1707	0.8315	0.8293	0.8095	0.8095	0.1905	0.6385	0.8169	0.7872	0.2128	0.7872	0.7872	0.7651	0.7651	0.235	0.5518	0.7715
KStar	InfoGain	10	lazy	0.7944	0.2056	0.8333	0.7944	0.821	0.821	0.179	0.6148	0.8049	0.7606	0.2394	0.8156	0.7606	0.8104	0.8104	0.1896	0.5688	0.7765
IBk	InfoGain	10	lazy	0.8078	0.1922	0.8262	0.8078	0.8038	0.8038	0.1962	0.6116	0.8057	0.8298	0.1703	0.844	0.8298	0.8232	0.8232	0.1768	0.653	0.8263
MultiClassClassifier	InfoGain	100*	meta	0.7742	0.2258	0.7975	0.7742	0.772	0.772	0.228	0.5462	0.7731	0.7819	0.2181	0.8014	0.7819	0.7763	0.7763	0.2237	0.5582	0.7789
VotedPerceptron	InfoGain	10	functions	0.5793	0.4207	0.4391	0.5793	0.6864	0.6864	0.3136	0.2431	0.4084	0.5053	0.4947	0.3404	0.5053	0.6679	0.6679	0.3322	0.0598	0.2619
SPegasos	InfoGain	10	functions	0.5	0.5	0.6667	0.5	-0.1667	-0.1667	0.6667	-1	0.4	0.5	0.5	0.6667	0.5	0.3334	0.3334	0.6667	-1	0.4
SimpleLogistic	InfoGain	10	functions	0.8347	0.1653	0.8728	0.8347	0.8737	0.8737	0.1263	0.7073	0.8496	0.8244	0.1755	0.8652	0.8244	0.8663	0.8663	0.1337	0.6895	0.8401
RBFNetwork	InfoGain	10	functions	0.8347	0.1653	0.8692	0.8347	0.865	0.865	0.135	0.699	0.8469	0.7713	0.2288	0.8227	0.7713	0.8171	0.8171	0.1829	0.5866	0.7866
MultilayerPerceptron	InfoGain	10	functions	0.8562	0.1438	0.8835	0.8562	0.8774	0.8774	0.1226	0.7333	0.8653	0.8245	0.1755	0.8298	0.8245	0.8074	0.8074	0.1926	0.6316	0.814
REPTree	OneR	100*	trees	0.8266	0.1734	0.8513	0.8266	0.8351	0.8351	0.1649	0.6617	0.8306	0.8032	0.1968	0.8369	0.8032	0.8222	0.8222	0.1779	0.6251	0.8112
RandomTree	OneR	100*	trees	0.7742	0.2258	0.8047	0.7742	0.7813	0.7813	0.2187	0.5555	0.7775	0.75	0.25	0.766	0.75	0.7387	0.7387	0.2613	0.4885	0.7432
FT	OneR	100*	trees	0.8118	0.1882	0.8369	0.8118	0.818	0.818	0.182	0.6298	0.8148	0.8298	0.1702	0.8369	0.8298	0.8149	0.8149	0.1851	0.6444	0.821
DecisionStump	OneR	100*	trees	0.8226	0.1774	0.8262	0.8226	0.8037	0.8037	0.1963	0.626	0.8108	0.7872	0.2128	0.7872	0.7872	0.7651	0.7651	0.235	0.5518	0.7715
J48graft	OneR	100*	trees	0.8132	0.1868	0.8441	0.8132	0.8296	0.8296	0.1704	0.6426	0.8203	0.7819	0.2181	0.8085	0.7819	0.785	0.785	0.215	0.5669	0.7834
J48	OneR	100*	trees	0.7863	0.2137	0.8154	0.7863	0.7937	0.7937	0.2063	0.58	0.7897	0.7234	0.2766	0.7589	0.7234	0.7285	0.7285	0.2716	0.4518	0.7258
LMT	OneR	100*	trees	0.8078	0.1922	0.8441	0.8078	0.8332	0.8332	0.1668	0.6405	0.8181	0.8351	0.1649	0.8511	0.8351	0.8317	0.8317	0.1684	0.6668	0.8333
LADTree	OneR	100*	trees	0.8159	0.1841	0.8387	0.8159	0.8194	0.8194	0.1806	0.6352	0.8176	0.8139	0.1862	0.8369	0.8139	0.8173	0.8173	0.1827	0.6311	0.8155
RandomForest	OneR	100*	trees	0.8427	0.1573	0.8656	0.8427	0.8517	0.8517	0.1483	0.6943	0.8469	0.8404	0.1596	0.8511	0.8404	0.8306	0.8306	0.1695	0.6709	0.835
NBTree	OneR	100*	trees	0.8132	0.1868	0.8387	0.8132	0.8204	0.8204	0.1796	0.6335	0.8165	0.7659	0.2341	0.7872	0.7659	0.7607	0.7607	0.2394	0.5266	0.7631
Logistic	GainRatio	30	functions	0.8051	0.1949	0.8441	0.8051	0.8353	0.8353	0.1647	0.6397	0.8169	0.7766	0.2234	0.8227	0.7766	0.8122	0.8122	0.1878	0.5877	0.7895
LibSVM	SymmerU	100*	functions	0.5	0.5	0.6667	0.5	-0.1667	-0.1667	0.6667	-1	0.4	0.5	0.5	0.6667	0.5	0.3334	0.3334	0.6667	-1	0.4
BayesNet	GainRatio	30	bayes	0.8575	0.1425	0.8835	0.8575	0.8763	0.8763	0.1237	0.7336	0.8657	0.8245	0.1755	0.844	0.8245	0.8245	0.8245	0.1755	0.6489	0.8245
BayesianLogisticRegression	GainRatio	30	bayes	0.5	0.5	0.3333	0.5	-0.3333	-0.3333	0.8333	-1	0.25	0.5	0.5	0.3333	0.5	0.1667	0.1667	0.8334	-1	0.25
DMNBtext	GainRatio	30	bayes	0.7272	0.2728	0.7939	0.7272	0.7904	0.7904	0.2096	0.5137	0.7437	0.6968	0.3032	0.7589	0.6968	0.7344	0.7344	0.2657	0.4295	0.7077
HyperPipes	GainRatio	100*	misc	0.6532	0.3468	0.5609	0.6532	0.6711	0.6711	0.3289	0.3238	0.5594	0.5851	0.4149	0.4823	0.5851	0.6103	0.6103	0.3898	0.1937	0.4755
NaiveBayesMultinomialUpdateable	GainRatio	30	bayes	0.7392	0.2608	0.7921	0.7392	0.7752	0.7752	0.2248	0.5132	0.7513	0.7659	0.2341	0.8085	0.7659	0.7909	0.7909	0.2092	0.5562	0.7756
NaiveBayesMultinomial	GainRatio	30	bayes	0.7392	0.2608	0.7921	0.7392	0.7752	0.7752	0.2248	0.5132	0.7513	0.7659	0.2341	0.8085	0.7659	0.7909	0.7909	0.2092	0.5562	0.7756
MultiBoostAB	InfoGain	100*	meta	0.8441	0.1559	0.8602	0.8441	0.8423	0.8423	0.1577	0.6863	0.8432	0.8085	0.1915	0.8298	0.8085	0.8085	0.8085	0.1915	0.617	0.8085
Logistic	SymmerU	100*	functions	0.7876	0.2124	0.8118	0.7876	0.7884	0.7884	0.2116	0.576	0.788	0.8032	0.1968	0.8298	0.8032	0.8101	0.8101	0.1899	0.6132	0.8064
OneR	SymmerU	50	rules	0.7702	0.2298	0.8011	0.7702	0.7772	0.7772	0.2228	0.5473	0.7734	0.75	0.25	0.766	0.75	0.7387	0.7387	0.2613	0.4885	0.7432
BayesNet	SymmerU	100*	bayes	0.8374	0.1626	0.8584	0.8374	0.8421	0.8421	0.1579	0.6794	0.8396	0.8192	0.1809	0.8298	0.8192	0.8072	0.8072	0.1928	0.6262	0.8124
ComplementNaiveBayes	SymmerU	100*	bayes	0.6788	0.3212	0.7455	0.6788	0.7177	0.7177	0.2823	0.3945	0.6889	0.6543	0.3458	0.7234	0.6543	0.6873	0.6873	0.3127	0.34	0.6623
DMNBtext	SymmerU	100*	bayes	0.8253	0.1747	0.8566	0.8253	0.8459	0.8459	0.1541	0.6708	0.834	0.8245	0.1756	0.8582	0.8245	0.8497	0.8497	0.1503	0.6736	0.8348
NaiveBayesMultinomial	SymmerU	100*	bayes	0.6788	0.3212	0.7455	0.6788	0.7177	0.7177	0.2823	0.3945	0.6889	0.6543	0.3458	0.7234	0.6543	0.6873	0.6873	0.3127	0.34	0.6623
NaiveBayesMultinomialUpdateable	SymmerU	100*	bayes	0.6788	0.3212	0.7455	0.6788	0.7177	0.7177	0.2823	0.3945	0.6889	0.6543	0.3458	0.7234	0.6543	0.6873	0.6873	0.3127	0.34	0.6623
LWL	GainRatio	50	lazy	0.8266	0.1734	0.8315	0.8266	0.8092	0.8092	0.1908	0.6356	0.816	0.7872	0.2128	0.7872	0.7872	0.7651	0.7651	0.235	0.5518	0.7715
AdaBoostM1	GainRatio	50	meta	0.8239	0.1761	0.853	0.8239	0.8398	0.8398	0.1602	0.6635	0.8309	0.8085	0.1915	0.8298	0.8085	0.8085	0.8085	0.1915	0.617	0.8085
IBk	GainRatio	50	lazy	0.7218	0.2782	0.776	0.7218	0.754	0.754	0.246	0.4747	0.7325	0.7447	0.2553	0.7943	0.7447	0.7762	0.7762	0.2239	0.5199	0.7558
KStar	GainRatio	50	lazy	0.7191	0.2809	0.7885	0.7191	0.785	0.785	0.215	0.4997	0.7354	0.7713	0.2287	0.8369	0.7713	0.8599	0.8599	0.1401	0.6249	0.7946
VotedPerceptron	GainRatio	50	functions	0.6129	0.3871	0.6111	0.6129	0.6008	0.6008	0.3992	0.2133	0.5951	0.5851	0.4149	0.5745	0.5851	0.5757	0.5757	0.4243	0.1605	0.5628
IB1	GainRatio	50	lazy	0.7218	0.2782	0.776	0.7218	0.754	0.754	0.246	0.4747	0.7325	0.7447	0.2553	0.7943	0.7447	0.7762	0.7762	0.2239	0.5199	0.7558
SimpleLogistic	GainRatio	50	functions	0.828	0.172	0.8656	0.828	0.8633	0.8633	0.1367	0.6903	0.8416	0.7926	0.2075	0.844	0.7926	0.8484	0.8484	0.1517	0.6385	0.8109
SPegasos	GainRatio	50	functions	0.5	0.5	0.6667	0.5	-0.1667	-0.1667	0.6667	-1	0.4	0.5	0.5	0.6667	0.5	0.3334	0.3334	0.6667	-1	0.4
MultilayerPerceptron	GainRatio	50	functions	0.828	0.172	0.8602	0.828	0.8512	0.8512	0.1488	0.6787	0.8377	0.8245	0.1755	0.844	0.8245	0.8245	0.8245	0.1755	0.6489	0.8245
RBFNetwork	GainRatio	50	functions	0.8212	0.1788	0.8387	0.8212	0.8179	0.8179	0.1821	0.6391	0.8195	0.7181	0.2819	0.8014	0.7181	0.8323	0.8323	0.1678	0.5384	0.7389
NaiveBayesMultinomialUpdateable	OneR	50	bayes	0.672	0.328	0.7419	0.672	0.7139	0.7139	0.2861	0.3837	0.6822	0.6437	0.3564	0.7234	0.6437	0.6905	0.6905	0.3095	0.3308	0.6516
NaiveBayesMultinomial	OneR	50	bayes	0.672	0.328	0.7419	0.672	0.7139	0.7139	0.2861	0.3837	0.6822	0.6437	0.3564	0.7234	0.6437	0.6905	0.6905	0.3095	0.3308	0.6516
DMNBtext	OneR	50	bayes	0.8024	0.1976	0.8441	0.8024	0.8377	0.8377	0.1623	0.6391	0.8157	0.8138	0.1862	0.8511	0.8138	0.8432	0.8432	0.1568	0.6564	0.8255
ComplementNaiveBayes	OneR	50	bayes	0.672	0.328	0.7419	0.672	0.7139	0.7139	0.2861	0.3837	0.6822	0.6437	0.3564	0.7234	0.6437	0.6905	0.6905	0.3095	0.3308	0.6516
BayesNet	OneR	50	bayes	0.8468	0.1532	0.8728	0.8468	0.8626	0.8626	0.1374	0.7092	0.8538	0.8192	0.1809	0.8369	0.8192	0.8159	0.8159	0.1842	0.635	0.8175
BayesianLogisticRegression	OneR	50	bayes	0.5027	0.4973	0.353	0.5027	0.5121	0.5121	0.4879	0.0114	0.2974	0.5107	0.4893	0.3759	0.5107	0.5265	0.5265	0.4736	0.0335	0.3398
Logistic	OneR	50	functions	0.8065	0.1935	0.8387	0.8065	0.8236	0.8236	0.1764	0.6298	0.8138	0.8511	0.1489	0.8794	0.8511	0.873	0.873	0.127	0.7237	0.8605
NaiveBayes	OneR	50	bayes	0.8105	0.1895	0.8513	0.8105	0.8467	0.8467	0.1533	0.6562	0.8242	0.7979	0.2021	0.8369	0.7979	0.8258	0.8258	0.1743	0.623	0.8089
HyperPipes	OneR	30	misc	0.621	0.379	0.5108	0.621	0.6622	0.6622	0.3378	0.2802	0.5032	0.5958	0.4043	0.4823	0.5958	0.6375	0.6375	0.3626	0.2294	0.4717
LibSVM	OneR	50	functions	0.5	0.5	0.6667	0.5	-0.1667	-0.1667	0.6667	-1	0.4	0.5	0.5	0.6667	0.5	0.3334	0.3334	0.6667	-1	0.4
DTNB	InfoGain	10	rules	0.8629	0.1371	0.8871	0.8629	0.8794	0.8794	0.1206	0.7422	0.8703	0.8298	0.1702	0.8582	0.8298	0.8458	0.8458	0.1542	0.6754	0.8368
FilteredClassifier	OneR	100*	meta	0.8065	0.1935	0.828	0.8065	0.8065	0.8065	0.1935	0.6129	0.8065	0.7766	0.2234	0.8085	0.7766	0.7864	0.7864	0.2137	0.5628	0.781
Ridor	SymmerU	50	rules	0.8239	0.1761	0.8477	0.8239	0.8304	0.8304	0.1696	0.6543	0.827	0.7926	0.2075	0.8227	0.7926	0.8029	0.8029	0.1972	0.5953	0.7972
PART	InfoGain	10	rules	0.828	0.172	0.8602	0.828	0.8512	0.8512	0.1488	0.6787	0.8377	0.7607	0.2394	0.7943	0.7607	0.7698	0.7698	0.2302	0.5304	0.7648
BFTree	InfoGain	50	trees	0.8387	0.1613	0.871	0.8387	0.8653	0.8653	0.1347	0.7035	0.8497	0.8032	0.1968	0.8298	0.8032	0.8101	0.8101	0.1899	0.6132	0.8064
ADTree	InfoGain	50	trees	0.8481	0.1519	0.871	0.8481	0.8583	0.8583	0.1417	0.7063	0.8528	0.7978	0.2022	0.8298	0.7978	0.8122	0.8122	0.1878	0.61	0.8041
NNge	InfoGain	50	rules	0.836	0.164	0.8477	0.836	0.8269	0.8269	0.1731	0.6629	0.8311	0.7873	0.2128	0.7943	0.7873	0.7702	0.7702	0.2299	0.5571	0.7764
DTNB	InfoGain	50	rules	0.8212	0.1788	0.853	0.8212	0.8416	0.8416	0.1584	0.6625	0.8299	0.8245	0.1756	0.8582	0.8245	0.8497	0.8497	0.1503	0.6736	0.8348
DecisionTable	InfoGain	50	rules	0.7997	0.2003	0.8333	0.7997	0.8176	0.8176	0.1824	0.6171	0.8073	0.8139	0.1862	0.8369	0.8139	0.8173	0.8173	0.1827	0.6311	0.8155
ConjunctiveRule	InfoGain	50	rules	0.8132	0.1868	0.8226	0.8132	0.7994	0.7994	0.2006	0.6125	0.8051	0.7872	0.2128	0.7872	0.7872	0.7651	0.7651	0.235	0.5518	0.7715
ZeroR	InfoGain	50	rules	0.5	0.5	0.6667	0.5	-0.1667	-0.1667	0.6667	-1	0.4	0.5	0.5	0.6667	0.5	0.3334	0.3334	0.6667	-1	0.4
Ridor	InfoGain	50	rules	0.8306	0.1694	0.8548	0.8306	0.8392	0.8392	0.1608	0.6698	0.8346	0.7926	0.2075	0.8227	0.7926	0.8029	0.8029	0.1972	0.5953	0.7972
PART	InfoGain	50	rules	0.8696	0.1304	0.8871	0.8696	0.8748	0.8748	0.1252	0.7444	0.8721	0.7978	0.2022	0.8298	0.7978	0.8122	0.8122	0.1878	0.61	0.8041
OneR	InfoGain	50	rules	0.7702	0.2298	0.8011	0.7702	0.7772	0.7772	0.2228	0.5473	0.7734	0.75	0.25	0.766	0.75	0.7387	0.7387	0.2613	0.4885	0.7432
OneR	InfoGain	10	rules	0.7702	0.2298	0.8011	0.7702	0.7772	0.7772	0.2228	0.5473	0.7734	0.75	0.25	0.766	0.75	0.7387	0.7387	0.2613	0.4885	0.7432
Dagging	OneR	10	meta	0.7648	0.2352	0.8351	0.7648	0.8668	0.8668	0.1332	0.6233	0.7894	0.7713	0.2287	0.8369	0.7713	0.8599	0.8599	0.1401	0.6249	0.7946
J48graft	SymmerU	30	trees	0.8508	0.1492	0.8763	0.8508	0.8668	0.8668	0.1332	0.7174	0.8579	0.8032	0.1968	0.8369	0.8032	0.8222	0.8222	0.1779	0.6251	0.8112
J48	SymmerU	30	trees	0.8495	0.1505	0.8728	0.8495	0.8608	0.8608	0.1392	0.7101	0.8546	0.7873	0.2128	0.8227	0.7873	0.8052	0.8052	0.1948	0.5922	0.7948
FT	SymmerU	30	trees	0.8374	0.1626	0.8602	0.8374	0.8451	0.8451	0.1549	0.6824	0.841	0.8351	0.1649	0.8511	0.8351	0.8317	0.8317	0.1684	0.6668	0.8333
NaiveBayes	ReliefF	30	bayes	0.7621	0.2379	0.7975	0.7621	0.774	0.774	0.226	0.536	0.7673	0.6968	0.3032	0.7518	0.6968	0.7222	0.7222	0.2779	0.4182	0.7052
NaiveBayesMultinomialUpdateable	ReliefF	30	bayes	0.6626	0.3374	0.681	0.6626	0.6518	0.6518	0.3482	0.3143	0.6547	0.6756	0.3245	0.6809	0.6756	0.6596	0.6596	0.3404	0.3347	0.6612
NaiveBayesMultinomial	ReliefF	30	bayes	0.6626	0.3374	0.681	0.6626	0.6518	0.6518	0.3482	0.3143	0.6547	0.6756	0.3245	0.6809	0.6756	0.6596	0.6596	0.3404	0.3347	0.6612
LMT	SymmerU	30	trees	0.8185	0.1815	0.862	0.8185	0.8648	0.8648	0.1352	0.6818	0.8352	0.7873	0.2128	0.8298	0.7873	0.819	0.819	0.181	0.6054	0.7993
LADTree	SymmerU	30	trees	0.8468	0.1532	0.8638	0.8468	0.8468	0.8468	0.1532	0.6935	0.8468	0.8032	0.1968	0.8298	0.8032	0.8101	0.8101	0.1899	0.6132	0.8064
Ridor	SymmerU	10	rules	0.8508	0.1492	0.8763	0.8508	0.8668	0.8668	0.1332	0.7174	0.8579	0.7926	0.2075	0.8156	0.7926	0.7926	0.7926	0.2075	0.5851	0.7926
LibSVM	ReliefF	30	functions	0.5	0.5	0.6667	0.5	-0.1667	-0.1667	0.6667	-1	0.4	0.5	0.5	0.6667	0.5	0.3334	0.3334	0.6667	-1	0.4
RandomForest	OneR	30	trees	0.8481	0.1519	0.8692	0.8481	0.8551	0.8551	0.1449	0.7031	0.8514	0.8564	0.1436	0.8582	0.8564	0.8376	0.8376	0.1624	0.6937	0.8451
NBTree	OneR	30	trees	0.8293	0.1707	0.8495	0.8293	0.8311	0.8311	0.1689	0.6604	0.8302	0.7926	0.2075	0.8014	0.7926	0.7771	0.7771	0.2229	0.5695	0.7831
LMT	OneR	30	trees	0.8145	0.1855	0.8584	0.8145	0.8602	0.8602	0.1398	0.6732	0.8309	0.8298	0.1703	0.8723	0.8298	0.8787	0.8787	0.1214	0.7067	0.8474
LADTree	OneR	30	trees	0.8226	0.1774	0.8459	0.8226	0.828	0.828	0.172	0.6506	0.8252	0.7979	0.2021	0.8369	0.7979	0.8258	0.8258	0.1743	0.623	0.8089
J48graft	OneR	30	trees	0.8481	0.1519	0.8692	0.8481	0.8551	0.8551	0.1449	0.7031	0.8514	0.8245	0.1755	0.844	0.8245	0.8245	0.8245	0.1755	0.6489	0.8245
J48	OneR	30	trees	0.8427	0.1573	0.8638	0.8427	0.8485	0.8485	0.1515	0.6913	0.8455	0.8405	0.1596	0.8652	0.8405	0.8524	0.8524	0.1476	0.6927	0.8459
FT	OneR	30	trees	0.8145	0.1855	0.8351	0.8145	0.8145	0.8145	0.1855	0.629	0.8145	0.8351	0.1649	0.844	0.8351	0.8226	0.8226	0.1775	0.6575	0.828
DecisionStump	OneR	30	trees	0.8226	0.1774	0.8262	0.8226	0.8037	0.8037	0.1963	0.626	0.8108	0.7872	0.2128	0.7872	0.7872	0.7651	0.7651	0.235	0.5518	0.7715
ZeroR	InfoGain	10	rules	0.5	0.5	0.6667	0.5	-0.1667	-0.1667	0.6667	-1	0.4	0.5	0.5	0.6667	0.5	0.3334	0.3334	0.6667	-1	0.4
REPTree	OneR	30	trees	0.8185	0.1815	0.8477	0.8185	0.8331	0.8331	0.1669	0.6514	0.825	0.7713	0.2287	0.8156	0.7713	0.8013	0.8013	0.1987	0.5718	0.7825
RandomTree	OneR	30	trees	0.7675	0.2325	0.7939	0.7675	0.7682	0.7682	0.2318	0.5357	0.7678	0.7659	0.2341	0.7872	0.7659	0.7607	0.7607	0.2394	0.5266	0.7631
PART	SymmerU	10	rules	0.8535	0.1465	0.8746	0.8535	0.8616	0.8616	0.1384	0.7151	0.8573	0.8404	0.1596	0.8794	0.8404	0.8843	0.8843	0.1158	0.7234	0.8569
RBFNetwork	SymmerU	100*	functions	0.8159	0.1841	0.853	0.8159	0.8458	0.8458	0.1542	0.661	0.8277	0.7021	0.2979	0.7589	0.7021	0.7321	0.7321	0.2679	0.4332	0.7118
ADTree	GainRatio	10	trees	0.8401	0.1599	0.862	0.8401	0.8468	0.8468	0.1532	0.6868	0.8433	0.7926	0.2075	0.8014	0.7926	0.7771	0.7771	0.2229	0.5695	0.7831
LADTree	SymmerU	50	trees	0.8374	0.1626	0.853	0.8374	0.8339	0.8339	0.1661	0.6712	0.8356	0.8032	0.1968	0.8369	0.8032	0.8222	0.8222	0.1779	0.6251	0.8112
LMT	SymmerU	50	trees	0.8091	0.1909	0.8477	0.8091	0.8398	0.8398	0.1602	0.6482	0.8211	0.8245	0.1755	0.844	0.8245	0.8245	0.8245	0.1755	0.6489	0.8245
REPTree	InfoGain	100*	trees	0.8293	0.1707	0.8477	0.8293	0.8284	0.8284	0.1716	0.6577	0.8289	0.8032	0.1968	0.8369	0.8032	0.8222	0.8222	0.1779	0.6251	0.8112
RandomTree	InfoGain	100*	trees	0.7728	0.2272	0.7921	0.7728	0.7661	0.7661	0.2339	0.5389	0.7691	0.7393	0.2607	0.766	0.7393	0.7369	0.7369	0.2631	0.4763	0.7381
DecisionStump	SymmerU	50	trees	0.8226	0.1774	0.8262	0.8226	0.8037	0.8037	0.1963	0.626	0.8108	0.7872	0.2128	0.7872	0.7872	0.7651	0.7651	0.235	0.5518	0.7715
FT	SymmerU	50	trees	0.8145	0.1855	0.8387	0.8145	0.8198	0.8198	0.1802	0.6343	0.817	0.8085	0.1915	0.8369	0.8085	0.8194	0.8194	0.1807	0.6278	0.8135
J48	SymmerU	50	trees	0.8387	0.1613	0.8638	0.8387	0.8508	0.8508	0.1492	0.6894	0.8442	0.7819	0.2181	0.8156	0.7819	0.7956	0.7956	0.2045	0.5773	0.7878
J48graft	SymmerU	50	trees	0.8481	0.1519	0.8728	0.8481	0.8616	0.8616	0.1384	0.7096	0.8542	0.8032	0.1968	0.8298	0.8032	0.8101	0.8101	0.1899	0.6132	0.8064
J48graft	InfoGain	100*	trees	0.8226	0.1774	0.8513	0.8226	0.8373	0.8373	0.1627	0.6597	0.8291	0.7659	0.2341	0.8085	0.7659	0.7909	0.7909	0.2092	0.5562	0.7756
J48	InfoGain	100*	trees	0.7876	0.2124	0.8118	0.7876	0.7884	0.7884	0.2116	0.576	0.788	0.7713	0.2287	0.8085	0.7713	0.7883	0.7883	0.2118	0.5593	0.7784
FT	InfoGain	100*	trees	0.8293	0.1707	0.8477	0.8293	0.8284	0.8284	0.1716	0.6577	0.8289	0.8298	0.1702	0.8298	0.8298	0.808	0.808	0.192	0.6374	0.8157
DecisionStump	InfoGain	100*	trees	0.8226	0.1774	0.8262	0.8226	0.8037	0.8037	0.1963	0.626	0.8108	0.7872	0.2128	0.7872	0.7872	0.7651	0.7651	0.235	0.5518	0.7715
RandomForest	InfoGain	100*	trees	0.8347	0.1653	0.8602	0.8347	0.8466	0.8466	0.1534	0.6812	0.8401	0.8245	0.1755	0.844	0.8245	0.8245	0.8245	0.1755	0.6489	0.8245
NBTree	InfoGain	100*	trees	0.8024	0.1976	0.8262	0.8024	0.8049	0.8049	0.1951	0.6073	0.8036	0.8085	0.1915	0.8298	0.8085	0.8085	0.8085	0.1915	0.617	0.8085
LMT	InfoGain	100*	trees	0.8226	0.1774	0.853	0.8226	0.8407	0.8407	0.1593	0.663	0.8304	0.8298	0.1702	0.8369	0.8298	0.8149	0.8149	0.1851	0.6444	0.821
LADTree	InfoGain	100*	trees	0.8065	0.1935	0.8315	0.8065	0.8116	0.8116	0.1884	0.6181	0.8089	0.8192	0.1809	0.8369	0.8192	0.8159	0.8159	0.1842	0.635	0.8175
SimpleLogistic	ReliefF	10	functions	0.836	0.164	0.8656	0.836	0.8561	0.8561	0.1439	0.6918	0.8446	0.8085	0.1915	0.8369	0.8085	0.8194	0.8194	0.1807	0.6278	0.8135
BFTree	SymmerU	100*	trees	0.8401	0.1599	0.871	0.8401	0.8641	0.8641	0.1359	0.7038	0.8501	0.7553	0.2447	0.7943	0.7553	0.7713	0.7713	0.2287	0.5264	0.762
SimpleLogistic	InfoGain	30	functions	0.8293	0.1707	0.8674	0.8293	0.8662	0.8662	0.1338	0.6945	0.8435	0.8298	0.1703	0.8723	0.8298	0.8787	0.8787	0.1214	0.7067	0.8474
DecisionTable	ReliefF	10	rules	0.8185	0.1815	0.8387	0.8185	0.8185	0.8185	0.1815	0.6371	0.8185	0.7926	0.2075	0.8014	0.7926	0.7771	0.7771	0.2229	0.5695	0.7831
NNge	SymmerU	50	rules	0.8441	0.1559	0.853	0.8441	0.8325	0.8325	0.1675	0.6765	0.8376	0.8192	0.1809	0.8369	0.8192	0.8159	0.8159	0.1842	0.635	0.8175
RBFNetwork	InfoGain	30	functions	0.8011	0.1989	0.8441	0.8011	0.839	0.839	0.161	0.6389	0.8151	0.7926	0.2075	0.8227	0.7926	0.8029	0.8029	0.1972	0.5953	0.7972
PART	SymmerU	50	rules	0.8602	0.1398	0.8746	0.8602	0.8583	0.8583	0.1417	0.7185	0.8592	0.8404	0.1596	0.8511	0.8404	0.8306	0.8306	0.1695	0.6709	0.835
KStar	InfoGain	30	lazy	0.7487	0.2513	0.8047	0.7487	0.7954	0.7954	0.2046	0.5421	0.7634	0.7659	0.2341	0.8085	0.7659	0.7909	0.7909	0.2092	0.5562	0.7756
ZeroR	SymmerU	50	rules	0.5	0.5	0.6667	0.5	-0.1667	-0.1667	0.6667	-1	0.4	0.5	0.5	0.6667	0.5	0.3334	0.3334	0.6667	-1	0.4
IB1	InfoGain	30	lazy	0.797	0.203	0.828	0.797	0.8096	0.8096	0.1904	0.6065	0.8026	0.7872	0.2128	0.8156	0.7872	0.7938	0.7938	0.2063	0.5809	0.7903
BFTree	SymmerU	50	trees	0.8589	0.1411	0.8817	0.8589	0.8716	0.8716	0.1284	0.7304	0.8647	0.7553	0.2447	0.8014	0.7553	0.7836	0.7836	0.2165	0.5381	0.7657
ADTree	SymmerU	50	trees	0.8562	0.1438	0.8781	0.8562	0.8666	0.8666	0.1334	0.7227	0.861	0.8192	0.1809	0.8227	0.8192	0.8001	0.8001	0.1999	0.619	0.8072
SPegasos	OneR	10	functions	0.5	0.5	0.6667	0.5	-0.1667	-0.1667	0.6667	-1	0.4	0.5	0.5	0.6667	0.5	0.3334	0.3334	0.6667	-1	0.4
AdaBoostM1	InfoGain	30	meta	0.8548	0.1452	0.8781	0.8548	0.8675	0.8675	0.1325	0.7222	0.8606	0.7873	0.2128	0.8298	0.7873	0.819	0.819	0.181	0.6054	0.7993
IB1	OneR	10	lazy	0.8199	0.1801	0.8351	0.8199	0.8134	0.8134	0.1866	0.6333	0.8164	0.7447	0.2553	0.7943	0.7447	0.7762	0.7762	0.2239	0.5199	0.7558
VotedPerceptron	OneR	10	functions	0.6156	0.3844	0.4946	0.6156	0.6774	0.6774	0.3226	0.2864	0.4817	0.5053	0.4947	0.3404	0.5053	0.6679	0.6679	0.3322	0.0598	0.2619
KStar	OneR	10	lazy	0.789	0.211	0.8333	0.789	0.8253	0.8253	0.1747	0.6133	0.8023	0.8245	0.1756	0.8582	0.8245	0.8497	0.8497	0.1503	0.6736	0.8348
IBk	OneR	10	lazy	0.8199	0.1801	0.8351	0.8199	0.8134	0.8134	0.1866	0.6333	0.8164	0.7447	0.2553	0.7943	0.7447	0.7762	0.7762	0.2239	0.5199	0.7558
DecisionStump	GainRatio	100*	trees	0.8226	0.1774	0.8262	0.8226	0.8037	0.8037	0.1963	0.626	0.8108	0.7872	0.2128	0.7872	0.7872	0.7651	0.7651	0.235	0.5518	0.7715
FT	GainRatio	100*	trees	0.8105	0.1895	0.8297	0.8105	0.808	0.808	0.192	0.6185	0.8092	0.8245	0.1755	0.8298	0.8245	0.8074	0.8074	0.1926	0.6316	0.814
NaiveBayes	SymmerU	30	bayes	0.8078	0.1922	0.853	0.8078	0.8541	0.8541	0.1459	0.6602	0.8242	0.8192	0.1809	0.8652	0.8192	0.873	0.873	0.127	0.6901	0.8378
J48graft	GainRatio	100*	trees	0.836	0.164	0.8674	0.836	0.8598	0.8598	0.1402	0.6954	0.846	0.7713	0.2287	0.8156	0.7713	0.8013	0.8013	0.1987	0.5718	0.7825
LADTree	GainRatio	100*	trees	0.8427	0.1573	0.8602	0.8427	0.8427	0.8427	0.1573	0.6855	0.8427	0.8085	0.1915	0.8369	0.8085	0.8194	0.8194	0.1807	0.6278	0.8135
NaiveBayesMultinomialUpdateable	SymmerU	30	bayes	0.7473	0.2527	0.7867	0.7473	0.7621	0.7621	0.2379	0.5092	0.7535	0.7288	0.2713	0.7801	0.7288	0.7582	0.7582	0.2419	0.486	0.739
ComplementNaiveBayes	SymmerU	30	bayes	0.7473	0.2527	0.7867	0.7473	0.7621	0.7621	0.2379	0.5092	0.7535	0.7288	0.2713	0.7801	0.7288	0.7582	0.7582	0.2419	0.486	0.739
RandomForest	GainRatio	100*	trees	0.8441	0.1559	0.871	0.8441	0.8609	0.8609	0.1391	0.7048	0.8515	0.8298	0.1703	0.844	0.8298	0.8232	0.8232	0.1768	0.653	0.8263
RandomTree	GainRatio	100*	trees	0.7433	0.2567	0.7724	0.7433	0.7439	0.7439	0.2561	0.4872	0.7436	0.7766	0.2234	0.7872	0.7766	0.762	0.762	0.238	0.5384	0.7676
REPTree	GainRatio	100*	trees	0.832	0.168	0.8602	0.832	0.8483	0.8483	0.1517	0.6801	0.8391	0.8298	0.1702	0.8511	0.8298	0.8334	0.8334	0.1666	0.6632	0.8316
LibSVM	SymmerU	30	functions	0.5	0.5	0.6667	0.5	-0.1667	-0.1667	0.6667	-1	0.4	0.5	0.5	0.6667	0.5	0.3334	0.3334	0.6667	-1	0.4
SimpleLogistic	SymmerU	30	functions	0.8185	0.1815	0.862	0.8185	0.8648	0.8648	0.1352	0.6818	0.8352	0.7873	0.2128	0.8298	0.7873	0.819	0.819	0.181	0.6054	0.7993
MultiClassClassifier	InfoGain	30	meta	0.8024	0.1976	0.8459	0.8024	0.8419	0.8419	0.1581	0.6431	0.8169	0.8298	0.1702	0.8794	0.8298	0.9005	0.9005	0.0995	0.7269	0.8528
BFTree	OneR	50	trees	0.8347	0.1653	0.8548	0.8347	0.8374	0.8374	0.1626	0.6721	0.836	0.8085	0.1915	0.8369	0.8085	0.8194	0.8194	0.1807	0.6278	0.8135
ADTree	OneR	50	trees	0.8508	0.1492	0.8728	0.8508	0.8599	0.8599	0.1401	0.7107	0.8551	0.7978	0.2022	0.8298	0.7978	0.8122	0.8122	0.1878	0.61	0.8041
MultiBoostAB	InfoGain	30	meta	0.8427	0.1573	0.8584	0.8427	0.84	0.84	0.16	0.6828	0.8414	0.7873	0.2128	0.8085	0.7873	0.7843	0.7843	0.2158	0.5715	0.7857
PART	OneR	50	rules	0.8387	0.1613	0.8566	0.8387	0.8387	0.8387	0.1613	0.6774	0.8387	0.8032	0.1968	0.8227	0.8032	0.8001	0.8001	0.1999	0.6033	0.8016
OneR	OneR	50	rules	0.7702	0.2298	0.8011	0.7702	0.7772	0.7772	0.2228	0.5473	0.7734	0.75	0.25	0.766	0.75	0.7387	0.7387	0.2613	0.4885	0.7432
ZeroR	OneR	50	rules	0.5	0.5	0.6667	0.5	-0.1667	-0.1667	0.6667	-1	0.4	0.5	0.5	0.6667	0.5	0.3334	0.3334	0.6667	-1	0.4
Ridor	OneR	50	rules	0.8293	0.1707	0.8387	0.8293	0.8168	0.8168	0.1832	0.646	0.8222	0.8032	0.1968	0.8156	0.8032	0.7918	0.7918	0.2082	0.5949	0.7967
DecisionTable	OneR	50	rules	0.7715	0.2285	0.8082	0.7715	0.7877	0.7877	0.2123	0.559	0.7783	0.8192	0.1809	0.8369	0.8192	0.8159	0.8159	0.1842	0.635	0.8175
RandomForest	ReliefF	10	trees	0.8508	0.1492	0.8656	0.8508	0.848	0.848	0.152	0.6988	0.8494	0.8138	0.1862	0.8227	0.8138	0.7996	0.7996	0.2005	0.6133	0.8055
NNge	OneR	50	rules	0.8575	0.1425	0.8692	0.8575	0.8512	0.8512	0.1488	0.7087	0.8542	0.7979	0.2021	0.8156	0.7979	0.792	0.792	0.2081	0.5898	0.7947
DTNB	OneR	50	rules	0.8159	0.1841	0.8423	0.8159	0.8251	0.8251	0.1749	0.6409	0.8201	0.8245	0.1756	0.8582	0.8245	0.8497	0.8497	0.1503	0.6736	0.8348
NBTree	ReliefF	10	trees	0.8522	0.1478	0.8638	0.8522	0.845	0.845	0.155	0.6972	0.8484	0.7979	0.2021	0.8085	0.7979	0.7844	0.7844	0.2157	0.5821	0.7899
RBFNetwork	OneR	10	functions	0.7957	0.2043	0.8387	0.7957	0.8315	0.8315	0.1685	0.6262	0.809	0.8032	0.1968	0.8511	0.8032	0.8544	0.8544	0.1457	0.6556	0.8208
FT	ReliefF	10	trees	0.8616	0.1384	0.8835	0.8616	0.8732	0.8732	0.1268	0.7347	0.8669	0.8458	0.1543	0.8582	0.8458	0.8389	0.8389	0.1612	0.6846	0.8421
MultiClassClassifier	SymmerU	50	meta	0.7984	0.2016	0.8333	0.7984	0.8184	0.8184	0.1816	0.6165	0.8067	0.8351	0.1649	0.8652	0.8351	0.8561	0.8561	0.144	0.6908	0.8441
Dagging	InfoGain	30	meta	0.8118	0.1882	0.8602	0.8118	0.8687	0.8687	0.1313	0.6781	0.831	0.8138	0.1862	0.8511	0.8138	0.8432	0.8432	0.1568	0.6564	0.8255
Bagging	InfoGain	30	meta	0.8589	0.1411	0.8871	0.8589	0.8829	0.8829	0.1171	0.7414	0.8691	0.8139	0.1862	0.8369	0.8139	0.8173	0.8173	0.1827	0.6311	0.8155
END	InfoGain	100*	meta	0.7876	0.2124	0.8118	0.7876	0.7884	0.7884	0.2116	0.576	0.788	0.7713	0.2287	0.8085	0.7713	0.7883	0.7883	0.2118	0.5593	0.7784
BayesNet	ReliefF	30	bayes	0.8401	0.1599	0.853	0.8401	0.8332	0.8332	0.1668	0.6732	0.8364	0.7926	0.2075	0.8156	0.7926	0.7926	0.7926	0.2075	0.5851	0.7926
VFI	SymmerU	50	misc	0.7984	0.2016	0.8262	0.7984	0.8062	0.8062	0.1938	0.6045	0.802	0.7554	0.2447	0.7589	0.7554	0.7355	0.7355	0.2645	0.4905	0.7411
BayesianLogisticRegression	ReliefF	30	bayes	0.5	0.5	0.3333	0.5	-0.3333	-0.3333	0.8333	-1	0.25	0.5	0.5	0.3333	0.5	0.1667	0.1667	0.8334	-1	0.25
LogitBoost	InfoGain	100*	meta	0.8468	0.1532	0.8728	0.8468	0.8626	0.8626	0.1374	0.7092	0.8538	0.8192	0.1809	0.8298	0.8192	0.8072	0.8072	0.1928	0.6262	0.8124
Logistic	ReliefF	30	functions	0.8508	0.1492	0.8746	0.8508	0.8633	0.8633	0.1367	0.714	0.8565	0.8192	0.1809	0.8511	0.8192	0.8391	0.8391	0.1609	0.658	0.8276
FilteredClassifier	InfoGain	100*	meta	0.8185	0.1815	0.8423	0.8185	0.8239	0.8239	0.1761	0.6425	0.8211	0.8032	0.1968	0.8227	0.8032	0.8001	0.8001	0.1999	0.6033	0.8016
FilteredClassifier	InfoGain	30	meta	0.836	0.164	0.8638	0.836	0.8525	0.8525	0.1475	0.6883	0.8433	0.7713	0.2287	0.8014	0.7713	0.7775	0.7775	0.2226	0.5487	0.7742
LogitBoost	ReliefF	100*	meta	0.832	0.168	0.8566	0.832	0.8417	0.8417	0.1583	0.6736	0.8365	0.8032	0.1968	0.8227	0.8032	0.8001	0.8001	0.1999	0.6033	0.8016
ConjunctiveRule	ReliefF	50	rules	0.8212	0.1788	0.8136	0.8212	0.7939	0.7939	0.2061	0.6145	0.8011	0.7872	0.2128	0.7872	0.7872	0.7651	0.7651	0.235	0.5518	0.7715
MultiClassClassifier	ReliefF	100*	meta	0.7823	0.2177	0.8011	0.7823	0.7759	0.7759	0.2241	0.5581	0.7788	0.7713	0.2288	0.7943	0.7713	0.7685	0.7685	0.2315	0.5398	0.7698
BayesianLogisticRegression	OneR	30	bayes	0.5242	0.4758	0.3817	0.5242	0.5725	0.5725	0.4275	0.0838	0.3395	0.4628	0.5373	0.3262	0.4628	0.385	0.385	0.6151	-0.1309	0.2793
ZeroR	ReliefF	50	rules	0.5	0.5	0.6667	0.5	-0.1667	-0.1667	0.6667	-1	0.4	0.5	0.5	0.6667	0.5	0.3334	0.3334	0.6667	-1	0.4
NaiveBayes	OneR	30	bayes	0.8078	0.1922	0.853	0.8078	0.8541	0.8541	0.1459	0.6602	0.8242	0.8298	0.1703	0.8723	0.8298	0.8787	0.8787	0.1214	0.7067	0.8474
Logistic	OneR	30	functions	0.8172	0.1828	0.853	0.8172	0.8447	0.8447	0.1553	0.6613	0.8283	0.8192	0.1809	0.8652	0.8192	0.873	0.873	0.127	0.6901	0.8378
RandomForest	SymmerU	30	trees	0.8441	0.1559	0.8656	0.8441	0.8509	0.8509	0.1491	0.695	0.8473	0.8671	0.133	0.8723	0.8671	0.8533	0.8533	0.1468	0.7202	0.8593
ADTree	ReliefF	50	trees	0.8051	0.1949	0.8297	0.8051	0.8094	0.8094	0.1906	0.6145	0.8072	0.8032	0.1968	0.8156	0.8032	0.7918	0.7918	0.2082	0.5949	0.7967
BFTree	ReliefF	50	trees	0.8078	0.1922	0.8369	0.8078	0.8198	0.8198	0.1802	0.6274	0.8132	0.8032	0.1968	0.8227	0.8032	0.8001	0.8001	0.1999	0.6033	0.8016
HyperPipes	ReliefF	100*	misc	0.6465	0.3535	0.5806	0.6465	0.6429	0.6429	0.3571	0.2894	0.5805	0.5478	0.4522	0.4681	0.5478	0.5532	0.5532	0.4469	0.1009	0.4664
VFI	ReliefF	100*	misc	0.7285	0.2715	0.7204	0.7285	0.7053	0.7053	0.2947	0.4332	0.7064	0.6596	0.3404	0.6312	0.6596	0.6425	0.6425	0.3576	0.3015	0.6244
LibSVM	OneR	30	functions	0.5	0.5	0.6667	0.5	-0.1667	-0.1667	0.6667	-1	0.4	0.5	0.5	0.6667	0.5	0.3334	0.3334	0.6667	-1	0.4
NNge	ReliefF	100*	rules	0.8226	0.1774	0.8441	0.8226	0.8252	0.8252	0.1748	0.6478	0.8239	0.7607	0.2394	0.7943	0.7607	0.7698	0.7698	0.2302	0.5304	0.7648
ConjunctiveRule	ReliefF	10	rules	0.8293	0.1707	0.8262	0.8293	0.805	0.805	0.195	0.6338	0.8128	0.7872	0.2128	0.7872	0.7872	0.7651	0.7651	0.235	0.5518	0.7715
DMNBtext	ReliefF	30	bayes	0.5591	0.4409	0.6774	0.5591	0.6198	0.6198	0.3802	0.1683	0.5438	0.5479	0.4521	0.6596	0.5479	0.584	0.584	0.4161	0.1268	0.5349
DTNB	ReliefF	100*	rules	0.836	0.164	0.853	0.836	0.8342	0.8342	0.1658	0.6703	0.8351	0.8192	0.1809	0.8298	0.8192	0.8072	0.8072	0.1928	0.6262	0.8124
ComplementNaiveBayes	ReliefF	30	bayes	0.6626	0.3374	0.681	0.6626	0.6518	0.6518	0.3482	0.3143	0.6547	0.6756	0.3245	0.6809	0.6756	0.6596	0.6596	0.3404	0.3347	0.6612
DecisionStump	ReliefF	10	trees	0.8226	0.1774	0.8262	0.8226	0.8037	0.8037	0.1963	0.626	0.8108	0.7872	0.2128	0.7872	0.7872	0.7651	0.7651	0.235	0.5518	0.7715
END	ReliefF	50	meta	0.7796	0.2204	0.8029	0.7796	0.7781	0.7781	0.2219	0.5577	0.7788	0.8086	0.1915	0.8227	0.8086	0.7996	0.7996	0.2005	0.608	0.8036
SimpleLogistic	OneR	10	functions	0.8306	0.1694	0.8746	0.8306	0.8838	0.8838	0.1162	0.7124	0.8494	0.8244	0.1755	0.8652	0.8244	0.8663	0.8663	0.1337	0.6895	0.8401
LibSVM	ReliefF	10	functions	0.5	0.5	0.6667	0.5	-0.1667	-0.1667	0.6667	-1	0.4	0.5	0.5	0.6667	0.5	0.3334	0.3334	0.6667	-1	0.4
ConjunctiveRule	ReliefF	100*	rules	0.8266	0.1734	0.8172	0.8266	0.7981	0.7981	0.2019	0.624	0.8053	0.7872	0.2128	0.7872	0.7872	0.7651	0.7651	0.235	0.5518	0.7715
NaiveBayes	ReliefF	10	bayes	0.7272	0.2728	0.7921	0.7272	0.7856	0.7856	0.2144	0.5094	0.743	0.633	0.367	0.7234	0.633	0.6965	0.6965	0.3036	0.3233	0.6396
Logistic	ReliefF	10	functions	0.8414	0.1586	0.8692	0.8414	0.8593	0.8593	0.1407	0.7005	0.8492	0.8085	0.1915	0.8369	0.8085	0.8194	0.8194	0.1807	0.6278	0.8135
BayesianLogisticRegression	ReliefF	10	bayes	0.5	0.5	0.3333	0.5	-0.3333	-0.3333	0.8333	-1	0.25	0.5	0.5	0.3333	0.5	0.1667	0.1667	0.8334	-1	0.25
BayesNet	ReliefF	10	bayes	0.836	0.164	0.8566	0.836	0.8398	0.8398	0.1602	0.6758	0.8378	0.7766	0.2234	0.8014	0.7766	0.7766	0.7766	0.2234	0.5532	0.7766
ComplementNaiveBayes	ReliefF	10	bayes	0.7782	0.2218	0.8297	0.7782	0.8274	0.8274	0.1726	0.6036	0.7945	0.7766	0.2234	0.8227	0.7766	0.8122	0.8122	0.1878	0.5877	0.7895
REPTree	SymmerU	30	trees	0.8333	0.1667	0.8548	0.8333	0.838	0.838	0.162	0.6713	0.8356	0.7713	0.2287	0.8156	0.7713	0.8013	0.8013	0.1987	0.5718	0.7825
NaiveBayesMultinomial	ReliefF	10	bayes	0.7782	0.2218	0.8297	0.7782	0.8274	0.8274	0.1726	0.6036	0.7945	0.7766	0.2234	0.8227	0.7766	0.8122	0.8122	0.1878	0.5877	0.7895
NaiveBayesMultinomialUpdateable	ReliefF	10	bayes	0.7728	0.2272	0.8262	0.7728	0.8242	0.8242	0.1758	0.5948	0.7895	0.7766	0.2234	0.8227	0.7766	0.8122	0.8122	0.1878	0.5877	0.7895
MultilayerPerceptron	InfoGain	100*	functions	0.8737	0.1263	0.8889	0.8737	0.8757	0.8757	0.1243	0.7494	0.8747	0.8564	0.1436	0.8865	0.8564	0.884	0.884	0.116	0.7399	0.8679
RandomTree	SymmerU	30	trees	0.7715	0.2285	0.7975	0.7715	0.7722	0.7722	0.2278	0.5437	0.7719	0.8085	0.1915	0.8156	0.8085	0.7923	0.7923	0.2078	0.6005	0.7986
PART	ReliefF	100*	rules	0.7903	0.2097	0.8136	0.7903	0.7903	0.7903	0.2097	0.5806	0.7903	0.7766	0.2234	0.7943	0.7766	0.7686	0.7686	0.2315	0.5451	0.7721
IBk	ReliefF	30	lazy	0.6868	0.3132	0.7473	0.6868	0.7178	0.7178	0.2822	0.4035	0.6961	0.7234	0.2766	0.7801	0.7234	0.7611	0.7611	0.2389	0.483	0.7353
MultiBoostAB	ReliefF	50	meta	0.8347	0.1653	0.8387	0.8347	0.8169	0.8169	0.1831	0.6513	0.8239	0.7978	0.2022	0.8014	0.7978	0.7782	0.7782	0.2218	0.5758	0.785
FilteredClassifier	ReliefF	50	meta	0.8105	0.1895	0.8351	0.8105	0.8157	0.8157	0.1843	0.6262	0.813	0.7713	0.2287	0.8014	0.7713	0.7775	0.7775	0.2226	0.5487	0.7742
IB1	ReliefF	30	lazy	0.6868	0.3132	0.7473	0.6868	0.7178	0.7178	0.2822	0.4035	0.6961	0.7234	0.2766	0.7801	0.7234	0.7611	0.7611	0.2389	0.483	0.7353
VotedPerceptron	ReliefF	30	functions	0.5659	0.4341	0.6935	0.5659	0.6703	0.6703	0.3297	0.2118	0.5448	0.5851	0.4149	0.7092	0.5851	0.7115	0.7115	0.2885	0.2683	0.5712
SPegasos	ReliefF	30	functions	0.5	0.5	0.6667	0.5	-0.1667	-0.1667	0.6667	-1	0.4	0.5	0.5	0.6667	0.5	0.3334	0.3334	0.6667	-1	0.4
LMT	GainRatio	100*	trees	0.8078	0.1922	0.8477	0.8078	0.8409	0.8409	0.1591	0.6479	0.8205	0.8192	0.1809	0.8582	0.8192	0.8545	0.8545	0.1456	0.6727	0.8327
SimpleLogistic	ReliefF	30	functions	0.8374	0.1626	0.8692	0.8374	0.8626	0.8626	0.1374	0.6995	0.8478	0.7873	0.2128	0.8298	0.7873	0.819	0.819	0.181	0.6054	0.7993
LWL	SymmerU	30	lazy	0.8293	0.1707	0.8315	0.8293	0.8095	0.8095	0.1905	0.6385	0.8169	0.7872	0.2128	0.7872	0.7872	0.7651	0.7651	0.235	0.5518	0.7715
AdaBoostM1	SymmerU	30	meta	0.8454	0.1546	0.8763	0.8454	0.8712	0.8712	0.1288	0.7162	0.8562	0.8192	0.1809	0.844	0.8192	0.8264	0.8264	0.1736	0.6455	0.8226
ADTree	ReliefF	100*	trees	0.8185	0.1815	0.8405	0.8185	0.8212	0.8212	0.1788	0.6397	0.8198	0.7873	0.2128	0.8085	0.7873	0.7843	0.7843	0.2158	0.5715	0.7857
RBFNetwork	ReliefF	30	functions	0.7782	0.2218	0.819	0.7782	0.8034	0.8034	0.1966	0.5811	0.7881	0.6649	0.3351	0.7376	0.6649	0.7089	0.7089	0.2912	0.3712	0.6747
MultilayerPerceptron	SymmerU	30	functions	0.8401	0.1599	0.8728	0.8401	0.8681	0.8681	0.1319	0.7076	0.8515	0.8032	0.1969	0.8085	0.8032	0.7852	0.7852	0.2149	0.588	0.7917
RBFNetwork	SymmerU	30	functions	0.7796	0.2204	0.8297	0.7796	0.826	0.826	0.174	0.6037	0.7953	0.7287	0.2713	0.8014	0.7287	0.8111	0.8111	0.1889	0.5335	0.7479
RandomTree	SymmerU	50	trees	0.8024	0.1976	0.8226	0.8024	0.8	0.8	0.2	0.6025	0.8012	0.8032	0.1968	0.8298	0.8032	0.8101	0.8101	0.1899	0.6132	0.8064
SPegasos	SymmerU	30	functions	0.5	0.5	0.6667	0.5	-0.1667	-0.1667	0.6667	-1	0.4	0.5	0.5	0.6667	0.5	0.3334	0.3334	0.6667	-1	0.4
VotedPerceptron	SymmerU	30	functions	0.6317	0.3683	0.672	0.6317	0.6314	0.6314	0.3686	0.2631	0.6315	0.6649	0.3351	0.695	0.6649	0.6601	0.6601	0.3399	0.325	0.6622
IB1	SymmerU	30	lazy	0.8199	0.1801	0.8441	0.8199	0.8263	0.8263	0.1737	0.6461	0.8229	0.7075	0.2926	0.766	0.7075	0.7425	0.7425	0.2576	0.4485	0.7183
IBk	SymmerU	30	lazy	0.8199	0.1801	0.8441	0.8199	0.8263	0.8263	0.1737	0.6461	0.8229	0.7075	0.2926	0.766	0.7075	0.7425	0.7425	0.2576	0.4485	0.7183
KStar	SymmerU	30	lazy	0.7339	0.2661	0.7993	0.7339	0.7973	0.7973	0.2027	0.5274	0.7509	0.7075	0.2925	0.773	0.7075	0.7572	0.7572	0.2429	0.4619	0.7208
VotedPerceptron	GainRatio	10	functions	0.8454	0.1546	0.8405	0.8454	0.8199	0.8199	0.1801	0.6649	0.8283	0.8244	0.1755	0.8014	0.8244	0.7902	0.7902	0.2098	0.6137	0.7927
J48	ReliefF	10	trees	0.8159	0.1841	0.8333	0.8159	0.8118	0.8118	0.1882	0.6276	0.8137	0.8086	0.1915	0.8227	0.8086	0.7996	0.7996	0.2005	0.608	0.8036
IB1	GainRatio	10	lazy	0.7917	0.2083	0.819	0.7917	0.7975	0.7975	0.2025	0.5891	0.7944	0.8192	0.1809	0.8369	0.8192	0.8159	0.8159	0.1842	0.635	0.8175
KStar	ReliefF	30	lazy	0.6452	0.3548	0.6649	0.6452	0.6353	0.6353	0.3647	0.2803	0.6376	0.6702	0.3298	0.695	0.6702	0.6625	0.6625	0.3375	0.3326	0.6654
RBFNetwork	InfoGain	100*	functions	0.8172	0.1828	0.8513	0.8172	0.8409	0.8409	0.1591	0.6577	0.827	0.7287	0.2713	0.773	0.7287	0.7465	0.7465	0.2536	0.4749	0.7357
SimpleLogistic	InfoGain	100*	functions	0.8333	0.1667	0.8656	0.8333	0.8582	0.8582	0.1418	0.6911	0.8437	0.8032	0.1968	0.8298	0.8032	0.8101	0.8101	0.1899	0.6132	0.8064
SPegasos	InfoGain	100*	functions	0.5	0.5	0.6667	0.5	-0.1667	-0.1667	0.6667	-1	0.4	0.5	0.5	0.6667	0.5	0.3334	0.3334	0.6667	-1	0.4
LWL	GainRatio	10	lazy	0.8266	0.1734	0.8297	0.8266	0.8075	0.8075	0.1925	0.6339	0.8147	0.7872	0.2128	0.7872	0.7872	0.7651	0.7651	0.235	0.5518	0.7715
IB1	InfoGain	100*	lazy	0.7863	0.2137	0.8226	0.7863	0.8055	0.8055	0.1945	0.5915	0.7943	0.7978	0.2022	0.8227	0.7978	0.8012	0.8012	0.1989	0.599	0.7995
IBk	InfoGain	100*	lazy	0.7863	0.2137	0.8226	0.7863	0.8055	0.8055	0.1945	0.5915	0.7943	0.7978	0.2022	0.8227	0.7978	0.8012	0.8012	0.1989	0.599	0.7995
MultilayerPerceptron	ReliefF	30	functions	0.8212	0.1788	0.8459	0.8212	0.8286	0.8286	0.1714	0.6498	0.8247	0.75	0.25	0.7943	0.75	0.7734	0.7734	0.2266	0.5229	0.759
LWL	InfoGain	100*	lazy	0.8293	0.1707	0.8315	0.8293	0.8095	0.8095	0.1905	0.6385	0.8169	0.7872	0.2128	0.7872	0.7872	0.7651	0.7651	0.235	0.5518	0.7715
AdaBoostM1	InfoGain	100*	meta	0.8481	0.1519	0.8763	0.8481	0.8689	0.8689	0.1311	0.7167	0.8571	0.7766	0.2234	0.8014	0.7766	0.7766	0.7766	0.2234	0.5532	0.7766
IBk	GainRatio	10	lazy	0.7917	0.2083	0.819	0.7917	0.7975	0.7975	0.2025	0.5891	0.7944	0.8192	0.1809	0.8369	0.8192	0.8159	0.8159	0.1842	0.635	0.8175
KStar	GainRatio	10	lazy	0.7997	0.2003	0.8405	0.7997	0.832	0.832	0.168	0.6309	0.8121	0.7659	0.2341	0.8085	0.7659	0.7909	0.7909	0.2092	0.5562	0.7756
MultilayerPerceptron	GainRatio	10	functions	0.8401	0.1599	0.8674	0.8401	0.8567	0.8567	0.1433	0.6966	0.8474	0.8138	0.1862	0.8227	0.8138	0.7996	0.7996	0.2005	0.6133	0.8055
RBFNetwork	GainRatio	10	functions	0.7742	0.2258	0.8315	0.7742	0.8374	0.8374	0.1626	0.6083	0.7933	0.6809	0.3192	0.7589	0.6809	0.746	0.746	0.254	0.4218	0.6938
SimpleLogistic	GainRatio	10	functions	0.8239	0.1761	0.8692	0.8239	0.8777	0.8777	0.1223	0.6995	0.8427	0.7873	0.2128	0.8369	0.7873	0.8357	0.8357	0.1643	0.6211	0.8037
LWL	ReliefF	30	lazy	0.8159	0.1841	0.8226	0.8159	0.7996	0.7996	0.2004	0.6153	0.806	0.7872	0.2128	0.7872	0.7872	0.7651	0.7651	0.235	0.5518	0.7715
MultiBoostAB	ReliefF	30	meta	0.836	0.164	0.8405	0.836	0.8188	0.8188	0.1812	0.6545	0.8256	0.7978	0.2022	0.8014	0.7978	0.7782	0.7782	0.2218	0.5758	0.785
AdaBoostM1	GainRatio	100*	meta	0.8401	0.1599	0.8674	0.8401	0.8567	0.8567	0.1433	0.6966	0.8474	0.8351	0.1649	0.8369	0.8351	0.8151	0.8151	0.1849	0.6499	0.8226
AdaBoostM1	ReliefF	30	meta	0.8212	0.1788	0.8441	0.8212	0.8257	0.8257	0.1743	0.647	0.8234	0.7819	0.2181	0.8156	0.7819	0.7956	0.7956	0.2045	0.5773	0.7878
SPegasos	GainRatio	10	functions	0.5	0.5	0.6667	0.5	-0.1667	-0.1667	0.6667	-1	0.4	0.5	0.5	0.6667	0.5	0.3334	0.3334	0.6667	-1	0.4
OneR	ReliefF	10	rules	0.8065	0.1935	0.8262	0.8065	0.804	0.804	0.196	0.6105	0.8052	0.75	0.25	0.766	0.75	0.7387	0.7387	0.2613	0.4885	0.7432
NaiveBayes	ReliefF	100*	bayes	0.8172	0.1828	0.8351	0.8172	0.8139	0.8139	0.1861	0.6311	0.8155	0.7607	0.2394	0.7943	0.7607	0.7698	0.7698	0.2302	0.5304	0.7648
MultilayerPerceptron	OneR	100*	functions	0.8159	0.1841	0.853	0.8159	0.8458	0.8458	0.1542	0.661	0.8277	0.8245	0.1755	0.8156	0.8245	0.7963	0.7963	0.2037	0.6201	0.8035
NaiveBayesMultinomial	InfoGain	100*	bayes	0.8078	0.1922	0.8244	0.8078	0.8016	0.8016	0.1984	0.6094	0.8045	0.7766	0.2234	0.7872	0.7766	0.762	0.762	0.238	0.5384	0.7676
REPTree	GainRatio	30	trees	0.8145	0.1855	0.8351	0.8145	0.8145	0.8145	0.1855	0.629	0.8145	0.7873	0.2128	0.8298	0.7873	0.819	0.819	0.181	0.6054	0.7993
IB1	InfoGain	10	lazy	0.8078	0.1922	0.8262	0.8078	0.8038	0.8038	0.1962	0.6116	0.8057	0.8298	0.1703	0.844	0.8298	0.8232	0.8232	0.1768	0.653	0.8263
NBTree	SymmerU	30	trees	0.8051	0.1949	0.8297	0.8051	0.8094	0.8094	0.1906	0.6145	0.8072	0.7873	0.2128	0.8227	0.7873	0.8052	0.8052	0.1948	0.5922	0.7948
MultiBoostAB	ReliefF	100*	meta	0.8401	0.1599	0.8441	0.8401	0.8226	0.8226	0.1774	0.6624	0.8295	0.7926	0.2075	0.7943	0.7926	0.7716	0.7716	0.2285	0.5637	0.7782
VFI	SymmerU	100*	misc	0.7997	0.2003	0.7939	0.7997	0.7739	0.7739	0.2261	0.573	0.7803	0.7447	0.2553	0.7305	0.7447	0.7188	0.7188	0.2812	0.4628	0.7186
HyperPipes	SymmerU	100*	misc	0.6868	0.3132	0.6237	0.6868	0.6776	0.6776	0.3224	0.3643	0.6231	0.6224	0.3777	0.5461	0.6224	0.6266	0.6266	0.3734	0.2489	0.5459
MultiClassClassifier	SymmerU	100*	meta	0.7876	0.2124	0.8118	0.7876	0.7884	0.7884	0.2116	0.576	0.788	0.8032	0.1968	0.8298	0.8032	0.8101	0.8101	0.1899	0.6132	0.8064
MultiBoostAB	SymmerU	100*	meta	0.8414	0.1586	0.8584	0.8414	0.8405	0.8405	0.1595	0.6819	0.8409	0.8085	0.1915	0.8298	0.8085	0.8085	0.8085	0.1915	0.617	0.8085
LogitBoost	SymmerU	100*	meta	0.8548	0.1452	0.8799	0.8548	0.871	0.871	0.129	0.7257	0.862	0.8085	0.1915	0.8298	0.8085	0.8085	0.8085	0.1915	0.617	0.8085
FilteredClassifier	SymmerU	100*	meta	0.8253	0.1747	0.8423	0.8253	0.8219	0.8219	0.1781	0.6471	0.8235	0.766	0.234	0.7943	0.766	0.7689	0.7689	0.2311	0.5348	0.7674
END	SymmerU	100*	meta	0.8051	0.1949	0.8315	0.8051	0.8121	0.8121	0.1879	0.6172	0.8084	0.7607	0.2394	0.7943	0.7607	0.7698	0.7698	0.2302	0.5304	0.7648
Decorate	SymmerU	100*	meta	0.8602	0.1398	0.8889	0.8602	0.8857	0.8857	0.1143	0.7455	0.871	0.8298	0.1702	0.8369	0.8298	0.8149	0.8149	0.1851	0.6444	0.821
Dagging	SymmerU	100*	meta	0.832	0.168	0.8674	0.832	0.8635	0.8635	0.1365	0.6947	0.8445	0.8405	0.1596	0.8723	0.8405	0.8669	0.8669	0.1332	0.7068	0.8514
Bagging	SymmerU	100*	meta	0.8589	0.1411	0.8835	0.8589	0.8752	0.8752	0.1248	0.7339	0.8661	0.8298	0.1703	0.844	0.8298	0.8232	0.8232	0.1768	0.653	0.8263
LWL	OneR	100*	lazy	0.8266	0.1734	0.8297	0.8266	0.8075	0.8075	0.1925	0.6339	0.8147	0.7872	0.2128	0.7872	0.7872	0.7651	0.7651	0.235	0.5518	0.7715
Ridor	ReliefF	10	rules	0.8333	0.1667	0.8513	0.8333	0.8324	0.8324	0.1676	0.6658	0.8329	0.8245	0.1756	0.8582	0.8245	0.8497	0.8497	0.1503	0.6736	0.8348
FT	GainRatio	30	trees	0.8051	0.1949	0.8351	0.8051	0.818	0.818	0.182	0.6229	0.8108	0.7553	0.2447	0.7943	0.7553	0.7713	0.7713	0.2287	0.5264	0.762
LogitBoost	GainRatio	10	meta	0.8266	0.1734	0.853	0.8266	0.8382	0.8382	0.1618	0.6647	0.8319	0.8032	0.1968	0.8227	0.8032	0.8001	0.8001	0.1999	0.6033	0.8016
FilteredClassifier	GainRatio	10	meta	0.797	0.203	0.8351	0.797	0.8228	0.8228	0.1772	0.6193	0.8073	0.7978	0.2022	0.8227	0.7978	0.8012	0.8012	0.1989	0.599	0.7995
LogitBoost	ReliefF	30	meta	0.8347	0.1653	0.853	0.8347	0.8347	0.8347	0.1653	0.6694	0.8347	0.7819	0.2181	0.8014	0.7819	0.7763	0.7763	0.2237	0.5582	0.7789
ZeroR	GainRatio	100*	rules	0.5	0.5	0.6667	0.5	-0.1667	-0.1667	0.6667	-1	0.4	0.5	0.5	0.6667	0.5	0.3334	0.3334	0.6667	-1	0.4
Ridor	GainRatio	100*	rules	0.8185	0.1815	0.8513	0.8185	0.8399	0.8399	0.1601	0.6581	0.8275	0.7926	0.2075	0.8369	0.7926	0.8303	0.8303	0.1698	0.6216	0.8063
DecisionTable	GainRatio	100*	rules	0.7702	0.2298	0.8047	0.7702	0.7825	0.7825	0.2175	0.5525	0.7755	0.7978	0.2022	0.8298	0.7978	0.8122	0.8122	0.1878	0.61	0.8041
Bagging	GainRatio	10	meta	0.8401	0.1599	0.8656	0.8401	0.8533	0.8533	0.1467	0.6932	0.846	0.7873	0.2128	0.8085	0.7873	0.7843	0.7843	0.2158	0.5715	0.7857
END	GainRatio	50	meta	0.8118	0.1882	0.8423	0.8118	0.8271	0.8271	0.1729	0.6388	0.8185	0.8298	0.1702	0.8511	0.8298	0.8334	0.8334	0.1666	0.6632	0.8316
Decorate	GainRatio	50	meta	0.8522	0.1478	0.8799	0.8522	0.8732	0.8732	0.1268	0.725	0.8612	0.8085	0.1915	0.8369	0.8085	0.8194	0.8194	0.1807	0.6278	0.8135
Dagging	GainRatio	50	meta	0.8091	0.1909	0.8566	0.8091	0.8621	0.8621	0.1379	0.6691	0.8273	0.8244	0.1755	0.8652	0.8244	0.8663	0.8663	0.1337	0.6895	0.8401
Bagging	GainRatio	50	meta	0.8441	0.1559	0.8674	0.8441	0.8541	0.8541	0.1459	0.6981	0.8487	0.7926	0.2075	0.8227	0.7926	0.8029	0.8029	0.1972	0.5953	0.7972
MultiClassClassifier	GainRatio	50	meta	0.8185	0.1815	0.8495	0.8185	0.8364	0.8364	0.1636	0.6547	0.8262	0.8086	0.1915	0.8511	0.8086	0.8483	0.8483	0.1518	0.6555	0.8232
MultiBoostAB	GainRatio	50	meta	0.8468	0.1532	0.8584	0.8468	0.839	0.839	0.161	0.6857	0.8426	0.8032	0.1968	0.8156	0.8032	0.7918	0.7918	0.2082	0.5949	0.7967
LogitBoost	GainRatio	50	meta	0.8199	0.1801	0.853	0.8199	0.8425	0.8425	0.1575	0.6621	0.8293	0.7926	0.2075	0.8156	0.7926	0.7926	0.7926	0.2075	0.5851	0.7926
FilteredClassifier	GainRatio	50	meta	0.8132	0.1868	0.8459	0.8132	0.833	0.833	0.167	0.6459	0.8216	0.7926	0.2075	0.8156	0.7926	0.7926	0.7926	0.2075	0.5851	0.7926
VFI	GainRatio	50	misc	0.8185	0.1815	0.8441	0.8185	0.8268	0.8268	0.1732	0.6453	0.8224	0.7766	0.2234	0.8085	0.7766	0.7864	0.7864	0.2137	0.5628	0.781
HyperPipes	GainRatio	50	misc	0.6062	0.3938	0.4892	0.6062	0.6568	0.6568	0.3432	0.258	0.4777	0.5426	0.4575	0.4113	0.5426	0.5892	0.5892	0.4109	0.1232	0.3834
Logistic	SymmerU	50	functions	0.7984	0.2016	0.8333	0.7984	0.8184	0.8184	0.1816	0.6165	0.8067	0.8351	0.1649	0.8652	0.8351	0.8561	0.8561	0.144	0.6908	0.8441
ADTree	ReliefF	10	trees	0.8105	0.1895	0.8405	0.8105	0.8246	0.8246	0.1754	0.635	0.8167	0.7713	0.2287	0.8156	0.7713	0.8013	0.8013	0.1987	0.5718	0.7825
BFTree	GainRatio	100*	trees	0.8535	0.1465	0.8746	0.8535	0.8616	0.8616	0.1384	0.7151	0.8573	0.7553	0.2447	0.7943	0.7553	0.7713	0.7713	0.2287	0.5264	0.762
ConjunctiveRule	OneR	50	rules	0.8132	0.1868	0.8226	0.8132	0.7994	0.7994	0.2006	0.6125	0.8051	0.7872	0.2128	0.7872	0.7872	0.7651	0.7651	0.235	0.5518	0.7715
NBTree	SymmerU	50	trees	0.8333	0.1667	0.8584	0.8333	0.8441	0.8441	0.1559	0.6774	0.8383	0.7873	0.2128	0.8085	0.7873	0.7843	0.7843	0.2158	0.5715	0.7857
HyperPipes	GainRatio	10	misc	0.5349	0.4651	0.3853	0.5349	0.6321	0.6321	0.3679	0.1359	0.3367	0.516	0.4841	0.3617	0.516	0.587	0.587	0.413	0.0745	0.3027
BayesianLogisticRegression	ReliefF	50	bayes	0.5	0.5	0.3333	0.5	-0.3333	-0.3333	0.8333	-1	0.25	0.5	0.5	0.3333	0.5	0.1667	0.1667	0.8334	-1	0.25
BayesNet	ReliefF	50	bayes	0.8508	0.1492	0.8602	0.8508	0.8405	0.8405	0.1595	0.6913	0.8452	0.7713	0.2288	0.7872	0.7713	0.7612	0.7612	0.2389	0.5323	0.7655
BFTree	ReliefF	10	trees	0.8293	0.1707	0.8513	0.8293	0.8339	0.8339	0.1661	0.6632	0.8315	0.8032	0.1968	0.8227	0.8032	0.8001	0.8001	0.1999	0.6033	0.8016
RandomForest	SymmerU	50	trees	0.8562	0.1438	0.8781	0.8562	0.8666	0.8666	0.1334	0.7227	0.861	0.8405	0.1596	0.844	0.8405	0.8225	0.8225	0.1775	0.6627	0.8296
NaiveBayesMultinomial	ReliefF	50	bayes	0.6774	0.3226	0.6828	0.6774	0.6614	0.6614	0.3386	0.3384	0.6631	0.6862	0.3138	0.6809	0.6862	0.6669	0.6669	0.3331	0.3525	0.6657
NaiveBayesMultinomialUpdateable	ReliefF	50	bayes	0.6801	0.3199	0.6864	0.6801	0.6642	0.6642	0.3358	0.3439	0.6663	0.6862	0.3138	0.6809	0.6862	0.6669	0.6669	0.3331	0.3525	0.6657
ComplementNaiveBayes	ReliefF	50	bayes	0.6774	0.3226	0.6828	0.6774	0.6614	0.6614	0.3386	0.3384	0.6631	0.6862	0.3138	0.6809	0.6862	0.6669	0.6669	0.3331	0.3525	0.6657
DMNBtext	ReliefF	50	bayes	0.5874	0.4126	0.6864	0.5874	0.6352	0.6352	0.3648	0.2174	0.5858	0.5372	0.4628	0.6312	0.5372	0.5507	0.5507	0.4494	0.0869	0.5317
LibSVM	ReliefF	50	functions	0.5	0.5	0.6667	0.5	-0.1667	-0.1667	0.6667	-1	0.4	0.5	0.5	0.6667	0.5	0.3334	0.3334	0.6667	-1	0.4
Decorate	ReliefF	100*	meta	0.8562	0.1438	0.8817	0.8562	0.8736	0.8736	0.1264	0.7296	0.8639	0.8032	0.1968	0.8227	0.8032	0.8001	0.8001	0.1999	0.6033	0.8016
Ridor	ReliefF	30	rules	0.8253	0.1747	0.8459	0.8253	0.827	0.827	0.173	0.6523	0.8261	0.7819	0.2181	0.8298	0.7819	0.8237	0.8237	0.1764	0.6041	0.7966
DecisionTable	SymmerU	30	rules	0.7997	0.2003	0.828	0.7997	0.8085	0.8085	0.1915	0.6081	0.8037	0.8192	0.1809	0.8369	0.8192	0.8159	0.8159	0.1842	0.635	0.8175
HyperPipes	InfoGain	50	misc	0.6868	0.3132	0.6165	0.6868	0.6822	0.6822	0.3178	0.369	0.6164	0.6117	0.3883	0.5248	0.6117	0.6241	0.6241	0.3759	0.2354	0.5233
VFI	InfoGain	50	misc	0.7997	0.2003	0.8297	0.7997	0.8114	0.8114	0.1886	0.611	0.8049	0.7873	0.2128	0.7943	0.7873	0.7702	0.7702	0.2299	0.5571	0.7764
FilteredClassifier	InfoGain	50	meta	0.828	0.172	0.8477	0.828	0.8288	0.8288	0.1712	0.6568	0.8284	0.7766	0.2234	0.8156	0.7766	0.798	0.798	0.202	0.5742	0.7853
LogitBoost	InfoGain	50	meta	0.8401	0.1599	0.8602	0.8401	0.8438	0.8438	0.1562	0.6839	0.8419	0.8298	0.1703	0.844	0.8298	0.8232	0.8232	0.1768	0.653	0.8263
MultiBoostAB	InfoGain	50	meta	0.8441	0.1559	0.8584	0.8441	0.8396	0.8396	0.1604	0.6837	0.8418	0.8085	0.1915	0.8298	0.8085	0.8085	0.8085	0.1915	0.617	0.8085
MultiClassClassifier	InfoGain	50	meta	0.8038	0.1962	0.8423	0.8038	0.8326	0.8326	0.1674	0.6357	0.8151	0.8298	0.1703	0.8723	0.8298	0.8787	0.8787	0.1214	0.7067	0.8474
Bagging	InfoGain	50	meta	0.8575	0.1425	0.8817	0.8575	0.8726	0.8726	0.1274	0.73	0.8643	0.8245	0.1755	0.844	0.8245	0.8245	0.8245	0.1755	0.6489	0.8245
Dagging	InfoGain	50	meta	0.8145	0.1855	0.8584	0.8145	0.8602	0.8602	0.1398	0.6732	0.8309	0.8245	0.1755	0.8723	0.8245	0.8864	0.8864	0.1136	0.7082	0.8453
Decorate	InfoGain	50	meta	0.8562	0.1438	0.8871	0.8562	0.8856	0.8856	0.1144	0.7412	0.8683	0.8298	0.1702	0.8511	0.8298	0.8334	0.8334	0.1666	0.6632	0.8316
END	InfoGain	50	meta	0.8293	0.1707	0.8513	0.8293	0.8339	0.8339	0.1661	0.6632	0.8315	0.7659	0.2341	0.7872	0.7659	0.7607	0.7607	0.2394	0.5266	0.7631
Dagging	SymmerU	30	meta	0.8118	0.1882	0.8584	0.8118	0.8636	0.8636	0.1364	0.6734	0.8297	0.8298	0.1702	0.8794	0.8298	0.9005	0.9005	0.0995	0.7269	0.8528
DTNB	SymmerU	10	rules	0.8508	0.1492	0.8746	0.8508	0.8633	0.8633	0.1367	0.714	0.8565	0.8139	0.1862	0.844	0.8139	0.829	0.829	0.171	0.6427	0.8205
DecisionTable	SymmerU	10	rules	0.8293	0.1707	0.8548	0.8293	0.8399	0.8399	0.1601	0.6692	0.8342	0.8192	0.1809	0.8369	0.8192	0.8159	0.8159	0.1842	0.635	0.8175
ConjunctiveRule	SymmerU	10	rules	0.8132	0.1868	0.8226	0.8132	0.7994	0.7994	0.2006	0.6125	0.8051	0.7872	0.2128	0.7872	0.7872	0.7651	0.7651	0.235	0.5518	0.7715
AdaBoostM1	ReliefF	100*	meta	0.8293	0.1707	0.8584	0.8293	0.8466	0.8466	0.1534	0.6757	0.8368	0.8085	0.1915	0.8298	0.8085	0.8085	0.8085	0.1915	0.617	0.8085
FilteredClassifier	SymmerU	30	meta	0.8266	0.1734	0.8548	0.8266	0.8415	0.8415	0.1585	0.6679	0.8332	0.7873	0.2128	0.8227	0.7873	0.8052	0.8052	0.1948	0.5922	0.7948
MultiClassClassifier	SymmerU	30	meta	0.8226	0.1774	0.8602	0.8226	0.8559	0.8559	0.1441	0.6777	0.8356	0.7926	0.2075	0.8369	0.7926	0.8303	0.8303	0.1698	0.6216	0.8063
OneR	SymmerU	10	rules	0.7702	0.2298	0.8011	0.7702	0.7772	0.7772	0.2228	0.5473	0.7734	0.75	0.25	0.766	0.75	0.7387	0.7387	0.2613	0.4885	0.7432
IB1	ReliefF	100*	lazy	0.7352	0.2648	0.8029	0.7352	0.806	0.806	0.194	0.5365	0.7534	0.7288	0.2713	0.7872	0.7288	0.7724	0.7724	0.2276	0.4992	0.7421
HyperPipes	SymmerU	30	misc	0.621	0.379	0.5179	0.621	0.6512	0.6512	0.3488	0.2705	0.5128	0.5585	0.4415	0.4468	0.5585	0.5865	0.5865	0.4136	0.1422	0.4343
BFTree	SymmerU	10	trees	0.8293	0.1707	0.8584	0.8293	0.8466	0.8466	0.1534	0.6757	0.8368	0.8245	0.1756	0.8582	0.8245	0.8497	0.8497	0.1503	0.6736	0.8348
IBk	ReliefF	100*	lazy	0.7352	0.2648	0.8029	0.7352	0.806	0.806	0.194	0.5365	0.7534	0.7288	0.2713	0.7872	0.7288	0.7724	0.7724	0.2276	0.4992	0.7421
RBFNetwork	ReliefF	100*	functions	0.8266	0.1734	0.8495	0.8266	0.8321	0.8321	0.1679	0.6587	0.8292	0.7926	0.2075	0.8085	0.7926	0.784	0.784	0.2159	0.5766	0.7878
MultilayerPerceptron	ReliefF	100*	functions	0.8669	0.1331	0.8817	0.8669	0.8669	0.8669	0.1331	0.7339	0.8669	0.8511	0.149	0.8582	0.8511	0.8379	0.8379	0.1621	0.6888	0.8436
SPegasos	ReliefF	100*	functions	0.5	0.5	0.6667	0.5	-0.1667	-0.1667	0.6667	-1	0.4	0.5	0.5	0.6667	0.5	0.3334	0.3334	0.6667	-1	0.4
SimpleLogistic	ReliefF	100*	functions	0.8602	0.1398	0.8835	0.8602	0.8742	0.8742	0.1258	0.7343	0.8665	0.8458	0.1543	0.8652	0.8458	0.8495	0.8495	0.1505	0.6953	0.8476
VFI	ReliefF	30	misc	0.5887	0.4113	0.5502	0.5887	0.5813	0.5813	0.4187	0.1698	0.5472	0.5638	0.4362	0.5532	0.5638	0.5568	0.5568	0.4433	0.1204	0.5421
LibSVM	GainRatio	100*	functions	0.5	0.5	0.6667	0.5	-0.1667	-0.1667	0.6667	-1	0.4	0.5	0.5	0.6667	0.5	0.3334	0.3334	0.6667	-1	0.4
LibSVM	GainRatio	10	functions	0.5269	0.4731	0.6685	0.5269	0.5965	0.5965	0.4035	0.1019	0.4816	0.5373	0.4628	0.6738	0.5373	0.6151	0.6151	0.385	0.1309	0.5008
NaiveBayesMultinomial	GainRatio	10	bayes	0.8387	0.1613	0.8728	0.8387	0.8694	0.8694	0.1306	0.7075	0.8511	0.7872	0.2128	0.8156	0.7872	0.7938	0.7938	0.2063	0.5809	0.7903
NaiveBayesMultinomialUpdateable	GainRatio	10	bayes	0.8468	0.1532	0.8763	0.8468	0.87	0.87	0.13	0.7164	0.8566	0.7873	0.2128	0.8085	0.7873	0.7843	0.7843	0.2158	0.5715	0.7857
ComplementNaiveBayes	GainRatio	10	bayes	0.8427	0.1573	0.8728	0.8427	0.8657	0.8657	0.1343	0.7081	0.8525	0.7978	0.2022	0.8227	0.7978	0.8012	0.8012	0.1989	0.599	0.7995
ComplementNaiveBayes	GainRatio	100*	bayes	0.7433	0.2567	0.7724	0.7433	0.7439	0.7439	0.2561	0.4872	0.7436	0.7074	0.2925	0.7305	0.7074	0.6997	0.6997	0.3004	0.407	0.7029
BayesNet	GainRatio	100*	bayes	0.8454	0.1546	0.871	0.8454	0.86	0.86	0.14	0.7053	0.8519	0.8245	0.1755	0.844	0.8245	0.8245	0.8245	0.1755	0.6489	0.8245
BayesNet	GainRatio	10	bayes	0.8374	0.1626	0.8692	0.8374	0.8626	0.8626	0.1374	0.6995	0.8478	0.8139	0.1862	0.844	0.8139	0.829	0.829	0.171	0.6427	0.8205
NaiveBayes	GainRatio	10	bayes	0.7675	0.2325	0.8244	0.7675	0.8257	0.8257	0.1743	0.5903	0.7853	0.6649	0.3351	0.7376	0.6649	0.7089	0.7089	0.2912	0.3712	0.6747
REPTree	SymmerU	50	trees	0.8347	0.1653	0.862	0.8347	0.8499	0.8499	0.1501	0.6844	0.8414	0.7713	0.2288	0.7943	0.7713	0.7685	0.7685	0.2315	0.5398	0.7698
LogitBoost	OneR	10	meta	0.8535	0.1465	0.8746	0.8535	0.8616	0.8616	0.1384	0.7151	0.8573	0.8405	0.1596	0.8652	0.8405	0.8524	0.8524	0.1476	0.6927	0.8459
IB1	SymmerU	50	lazy	0.8105	0.1895	0.8477	0.8105	0.8386	0.8386	0.1614	0.6485	0.8217	0.8032	0.1968	0.8369	0.8032	0.8222	0.8222	0.1779	0.6251	0.8112
END	GainRatio	10	meta	0.793	0.207	0.8297	0.793	0.8149	0.8149	0.1851	0.6075	0.802	0.8192	0.1809	0.8511	0.8192	0.8391	0.8391	0.1609	0.658	0.8276
LibSVM	GainRatio	30	functions	0.5	0.5	0.6667	0.5	-0.1667	-0.1667	0.6667	-1	0.4	0.5	0.5	0.6667	0.5	0.3334	0.3334	0.6667	-1	0.4
ComplementNaiveBayes	GainRatio	30	bayes	0.7392	0.2608	0.7921	0.7392	0.7752	0.7752	0.2248	0.5132	0.7513	0.7659	0.2341	0.8085	0.7659	0.7909	0.7909	0.2092	0.5562	0.7756
BayesianLogisticRegression	GainRatio	50	bayes	0.5161	0.4839	0.3584	0.5161	0.6148	0.6148	0.3852	0.0861	0.2945	0.5053	0.4947	0.3404	0.5053	0.6679	0.6679	0.3322	0.0598	0.2619
LibSVM	InfoGain	50	functions	0.5	0.5	0.6667	0.5	-0.1667	-0.1667	0.6667	-1	0.4	0.5	0.5	0.6667	0.5	0.3334	0.3334	0.6667	-1	0.4
ComplementNaiveBayes	SymmerU	50	bayes	0.6169	0.3831	0.7061	0.6169	0.6665	0.6665	0.3335	0.2791	0.6213	0.5958	0.4043	0.695	0.5958	0.6506	0.6506	0.3494	0.2402	0.5953
DMNBtext	InfoGain	50	bayes	0.8145	0.1855	0.8495	0.8145	0.8392	0.8392	0.1608	0.6533	0.8246	0.8298	0.1703	0.8723	0.8298	0.8787	0.8787	0.1214	0.7067	0.8474
ComplementNaiveBayes	InfoGain	50	bayes	0.6062	0.3938	0.7007	0.6062	0.6592	0.6592	0.3408	0.26	0.6083	0.5798	0.4202	0.6809	0.5798	0.6256	0.6256	0.3745	0.2002	0.5765
NaiveBayesMultinomialUpdateable	InfoGain	50	bayes	0.6062	0.3938	0.7007	0.6062	0.6592	0.6592	0.3408	0.26	0.6083	0.5798	0.4202	0.6809	0.5798	0.6256	0.6256	0.3745	0.2002	0.5765
NaiveBayesMultinomial	InfoGain	50	bayes	0.6062	0.3938	0.7007	0.6062	0.6592	0.6592	0.3408	0.26	0.6083	0.5798	0.4202	0.6809	0.5798	0.6256	0.6256	0.3745	0.2002	0.5765
Logistic	InfoGain	50	functions	0.8038	0.1962	0.8423	0.8038	0.8326	0.8326	0.1674	0.6357	0.8151	0.8298	0.1703	0.8723	0.8298	0.8787	0.8787	0.1214	0.7067	0.8474
NaiveBayes	InfoGain	50	bayes	0.8091	0.1909	0.853	0.8091	0.8525	0.8525	0.1475	0.6602	0.8248	0.7873	0.2128	0.8369	0.7873	0.8357	0.8357	0.1643	0.6211	0.8037
BayesNet	InfoGain	50	bayes	0.8535	0.1465	0.8746	0.8535	0.8616	0.8616	0.1384	0.7151	0.8573	0.8192	0.1809	0.8369	0.8192	0.8159	0.8159	0.1842	0.635	0.8175
BayesianLogisticRegression	InfoGain	50	bayes	0.5228	0.4772	0.3746	0.5228	0.5864	0.5864	0.4136	0.0888	0.3251	0.5213	0.4787	0.4184	0.5213	0.5297	0.5297	0.4703	0.0503	0.4077
LWL	OneR	10	lazy	0.8293	0.1707	0.8315	0.8293	0.8095	0.8095	0.1905	0.6385	0.8169	0.7872	0.2128	0.7872	0.7872	0.7651	0.7651	0.235	0.5518	0.7715
END	ReliefF	100*	meta	0.8051	0.1949	0.828	0.8051	0.8068	0.8068	0.1932	0.6119	0.8059	0.7873	0.2128	0.8085	0.7873	0.7843	0.7843	0.2158	0.5715	0.7857
LMT	ReliefF	10	trees	0.8266	0.1734	0.8566	0.8266	0.8449	0.8449	0.1551	0.6713	0.8345	0.7873	0.2128	0.8014	0.7873	0.7765	0.7765	0.2235	0.5636	0.7811
HyperPipes	InfoGain	100*	misc	0.7191	0.2809	0.6685	0.7191	0.6997	0.6997	0.3003	0.4183	0.6659	0.6596	0.3404	0.5957	0.6596	0.6536	0.6536	0.3465	0.3131	0.5954
LogitBoost	InfoGain	30	meta	0.8508	0.1492	0.8692	0.8508	0.8537	0.8537	0.1463	0.7045	0.8522	0.7926	0.2075	0.8227	0.7926	0.8029	0.8029	0.1972	0.5953	0.7972
Dagging	SymmerU	50	meta	0.8024	0.1976	0.8459	0.8024	0.8419	0.8419	0.1581	0.6431	0.8169	0.8192	0.1809	0.8582	0.8192	0.8545	0.8545	0.1456	0.6727	0.8327
END	InfoGain	30	meta	0.8401	0.1599	0.8638	0.8401	0.85	0.85	0.15	0.6899	0.8446	0.7979	0.2021	0.8156	0.7979	0.792	0.792	0.2081	0.5898	0.7947
Decorate	InfoGain	30	meta	0.8629	0.1371	0.8907	0.8629	0.8872	0.8872	0.1128	0.7497	0.8732	0.8298	0.1702	0.8511	0.8298	0.8334	0.8334	0.1666	0.6632	0.8316
J48graft	ReliefF	10	trees	0.8266	0.1734	0.8441	0.8266	0.824	0.824	0.176	0.6506	0.8253	0.8086	0.1915	0.8227	0.8086	0.7996	0.7996	0.2005	0.608	0.8036
LogitBoost	SymmerU	50	meta	0.8387	0.1613	0.8656	0.8387	0.8541	0.8541	0.1459	0.6927	0.8456	0.7872	0.2128	0.8156	0.7872	0.7938	0.7938	0.2063	0.5809	0.7903
Dagging	InfoGain	100*	meta	0.8441	0.1559	0.8728	0.8441	0.8646	0.8646	0.1354	0.7084	0.8529	0.8192	0.1809	0.8511	0.8192	0.8391	0.8391	0.1609	0.658	0.8276
Bagging	InfoGain	100*	meta	0.8508	0.1492	0.8763	0.8508	0.8668	0.8668	0.1332	0.7174	0.8579	0.8032	0.1968	0.8227	0.8032	0.8001	0.8001	0.1999	0.6033	0.8016
HyperPipes	SymmerU	50	misc	0.6546	0.3454	0.5699	0.6546	0.6644	0.6644	0.3356	0.3188	0.5693	0.6011	0.399	0.5035	0.6011	0.6227	0.6227	0.3773	0.2227	0.4993
Decorate	InfoGain	100*	meta	0.8602	0.1398	0.8889	0.8602	0.8857	0.8857	0.1143	0.7455	0.871	0.8298	0.1703	0.844	0.8298	0.8232	0.8232	0.1768	0.653	0.8263
REPTree	ReliefF	10	trees	0.8024	0.1976	0.8244	0.8024	0.8024	0.8024	0.1976	0.6048	0.8024	0.8139	0.1862	0.8298	0.8139	0.8076	0.8076	0.1924	0.6214	0.8105
RandomTree	ReliefF	10	trees	0.7944	0.2056	0.8154	0.7944	0.792	0.792	0.208	0.5864	0.7932	0.7394	0.2606	0.7589	0.7394	0.7304	0.7304	0.2696	0.4697	0.7342
VFI	InfoGain	30	misc	0.7272	0.2728	0.8047	0.7272	0.8257	0.8257	0.1743	0.544	0.7478	0.6224	0.3777	0.7305	0.6224	0.7332	0.7332	0.2669	0.3378	0.6242
HyperPipes	InfoGain	30	misc	0.6384	0.3616	0.5412	0.6384	0.6622	0.6622	0.3378	0.2997	0.5383	0.5958	0.4043	0.4894	0.5958	0.6271	0.6271	0.373	0.2206	0.4819
DecisionTable	InfoGain	10	rules	0.8038	0.1962	0.8351	0.8038	0.8186	0.8186	0.1814	0.6222	0.8103	0.8085	0.1915	0.8369	0.8085	0.8194	0.8194	0.1807	0.6278	0.8135
DMNBtext	OneR	100*	bayes	0.8185	0.1815	0.8566	0.8185	0.8515	0.8515	0.1485	0.6692	0.8314	0.8032	0.1968	0.844	0.8032	0.8367	0.8367	0.1633	0.639	0.816
NaiveBayesMultinomial	OneR	100*	bayes	0.7231	0.2769	0.6935	0.7231	0.6985	0.6985	0.3015	0.4209	0.6863	0.6862	0.3138	0.6383	0.6862	0.67	0.67	0.33	0.3558	0.6357
IBk	OneR	100*	lazy	0.7742	0.2258	0.8262	0.7742	0.8227	0.8227	0.1773	0.5949	0.7902	0.766	0.2341	0.8156	0.766	0.8054	0.8054	0.1947	0.57	0.7796
KStar	OneR	100*	lazy	0.6815	0.3185	0.7634	0.6815	0.7583	0.7583	0.2417	0.433	0.6952	0.6809	0.3192	0.773	0.6809	0.7944	0.7944	0.2056	0.4615	0.696
VotedPerceptron	OneR	100*	functions	0.7191	0.2809	0.7509	0.7191	0.7197	0.7197	0.2803	0.4388	0.7194	0.7288	0.2713	0.7518	0.7288	0.7221	0.7221	0.2779	0.4508	0.725
IB1	OneR	100*	lazy	0.7742	0.2258	0.8262	0.7742	0.8227	0.8227	0.1773	0.5949	0.7902	0.766	0.2341	0.8156	0.766	0.8054	0.8054	0.1947	0.57	0.7796
SimpleLogistic	OneR	100*	functions	0.8118	0.1882	0.8495	0.8118	0.8414	0.8414	0.1586	0.6526	0.8235	0.8351	0.1649	0.8511	0.8351	0.8317	0.8317	0.1684	0.6668	0.8333
SPegasos	OneR	100*	functions	0.5	0.5	0.6667	0.5	-0.1667	-0.1667	0.6667	-1	0.4	0.5	0.5	0.6667	0.5	0.3334	0.3334	0.6667	-1	0.4
RandomTree	GainRatio	30	trees	0.7823	0.2177	0.8154	0.7823	0.7951	0.7951	0.2049	0.5772	0.7879	0.7713	0.2288	0.7872	0.7713	0.7612	0.7612	0.2389	0.5323	0.7655
RBFNetwork	OneR	100*	functions	0.7984	0.2016	0.8369	0.7984	0.8254	0.8254	0.1746	0.6232	0.8091	0.75	0.25	0.8014	0.75	0.7871	0.7871	0.213	0.5358	0.7627
NBTree	GainRatio	30	trees	0.8575	0.1425	0.8692	0.8575	0.8512	0.8512	0.1488	0.7087	0.8542	0.8351	0.1649	0.8511	0.8351	0.8317	0.8317	0.1684	0.6668	0.8333
RandomForest	GainRatio	30	trees	0.8522	0.1478	0.8746	0.8522	0.8624	0.8624	0.1376	0.7145	0.8569	0.8458	0.1543	0.8582	0.8458	0.8389	0.8389	0.1612	0.6846	0.8421
LADTree	GainRatio	30	trees	0.828	0.172	0.8566	0.828	0.844	0.844	0.156	0.6718	0.835	0.7926	0.2074	0.8298	0.7926	0.8153	0.8153	0.1848	0.6074	0.8018
LMT	GainRatio	30	trees	0.7876	0.2124	0.8297	0.7876	0.8186	0.8186	0.1814	0.6055	0.7994	0.7873	0.2128	0.8298	0.7873	0.819	0.819	0.181	0.6054	0.7993
J48	GainRatio	30	trees	0.8239	0.1761	0.8548	0.8239	0.8432	0.8432	0.1568	0.6669	0.8322	0.8032	0.1968	0.8298	0.8032	0.8101	0.8101	0.1899	0.6132	0.8064
J48graft	GainRatio	30	trees	0.8253	0.1747	0.862	0.8253	0.8575	0.8575	0.1425	0.682	0.8379	0.7978	0.2022	0.8227	0.7978	0.8012	0.8012	0.1989	0.599	0.7995
DecisionStump	GainRatio	30	trees	0.8226	0.1774	0.8262	0.8226	0.8037	0.8037	0.1963	0.626	0.8108	0.7872	0.2128	0.7872	0.7872	0.7651	0.7651	0.235	0.5518	0.7715
AdaBoostM1	OneR	100*	meta	0.8495	0.1505	0.8781	0.8495	0.8716	0.8716	0.1284	0.7207	0.8589	0.8351	0.1649	0.844	0.8351	0.8226	0.8226	0.1775	0.6575	0.828
PART	GainRatio	100*	rules	0.836	0.164	0.8638	0.836	0.8525	0.8525	0.1475	0.6883	0.8433	0.7873	0.2128	0.8085	0.7873	0.7843	0.7843	0.2158	0.5715	0.7857
OneR	GainRatio	100*	rules	0.7702	0.2298	0.8011	0.7702	0.7772	0.7772	0.2228	0.5473	0.7734	0.75	0.25	0.766	0.75	0.7387	0.7387	0.2613	0.4885	0.7432
MultiClassClassifier	GainRatio	10	meta	0.8226	0.1774	0.8674	0.8226	0.8744	0.8744	0.1256	0.695	0.8408	0.7713	0.2288	0.8227	0.7713	0.8171	0.8171	0.1829	0.5866	0.7866
MultiBoostAB	GainRatio	10	meta	0.8226	0.1774	0.8405	0.8226	0.82	0.82	0.18	0.6426	0.8213	0.8032	0.1968	0.8014	0.8032	0.7798	0.7798	0.2202	0.5825	0.7868
Dagging	GainRatio	10	meta	0.7164	0.2836	0.8065	0.7164	0.862	0.862	0.138	0.5598	0.7388	0.6383	0.3617	0.7518	0.6383	0.8055	0.8055	0.1945	0.4111	0.6423
ConjunctiveRule	GainRatio	100*	rules	0.8132	0.1868	0.8226	0.8132	0.7994	0.7994	0.2006	0.6125	0.8051	0.7872	0.2128	0.7872	0.7872	0.7651	0.7651	0.235	0.5518	0.7715
NNge	GainRatio	100*	rules	0.8401	0.1599	0.8297	0.8401	0.8107	0.8107	0.1893	0.6501	0.8185	0.7872	0.2128	0.7872	0.7872	0.7651	0.7651	0.235	0.5518	0.7715
Decorate	GainRatio	10	meta	0.8401	0.1599	0.8638	0.8401	0.85	0.85	0.15	0.6899	0.8446	0.7713	0.2287	0.8085	0.7713	0.7883	0.7883	0.2118	0.5593	0.7784
BayesNet	OneR	100*	bayes	0.8347	0.1653	0.8602	0.8347	0.8466	0.8466	0.1534	0.6812	0.8401	0.8192	0.1809	0.8298	0.8192	0.8072	0.8072	0.1928	0.6262	0.8124
VFI	GainRatio	10	misc	0.6774	0.3226	0.776	0.6774	0.8177	0.8177	0.1823	0.4749	0.6923	0.6064	0.3937	0.7234	0.6064	0.735	0.735	0.265	0.3162	0.6015
ADTree	GainRatio	100*	trees	0.8522	0.1478	0.871	0.8522	0.8561	0.8561	0.1439	0.7082	0.854	0.7926	0.2075	0.8014	0.7926	0.7771	0.7771	0.2229	0.5695	0.7831
END	SymmerU	50	meta	0.8387	0.1613	0.8638	0.8387	0.8508	0.8508	0.1492	0.6894	0.8442	0.7819	0.2181	0.8156	0.7819	0.7956	0.7956	0.2045	0.5773	0.7878
HyperPipes	OneR	50	misc	0.6478	0.3522	0.5538	0.6478	0.6679	0.6679	0.3321	0.3151	0.5518	0.6011	0.3989	0.4965	0.6011	0.631	0.631	0.3691	0.2301	0.4899
VFI	OneR	50	misc	0.8038	0.1962	0.8262	0.8038	0.8046	0.8046	0.1954	0.6083	0.8042	0.7607	0.2394	0.773	0.7607	0.7469	0.7469	0.2531	0.5073	0.7521
MultiBoostAB	OneR	50	meta	0.8441	0.1559	0.8584	0.8441	0.8396	0.8396	0.1604	0.6837	0.8418	0.8085	0.1915	0.8298	0.8085	0.8085	0.8085	0.1915	0.617	0.8085
MultiClassClassifier	OneR	50	meta	0.8065	0.1935	0.8387	0.8065	0.8236	0.8236	0.1764	0.6298	0.8138	0.8511	0.1489	0.8794	0.8511	0.873	0.873	0.127	0.7237	0.8605
FilteredClassifier	OneR	50	meta	0.8414	0.1586	0.8584	0.8414	0.8405	0.8405	0.1595	0.6819	0.8409	0.7978	0.2022	0.8227	0.7978	0.8012	0.8012	0.1989	0.599	0.7995
LogitBoost	OneR	50	meta	0.8481	0.1519	0.871	0.8481	0.8583	0.8583	0.1417	0.7063	0.8528	0.7872	0.2128	0.8156	0.7872	0.7938	0.7938	0.2063	0.5809	0.7903
Decorate	OneR	50	meta	0.8481	0.1519	0.8763	0.8481	0.8689	0.8689	0.1311	0.7167	0.8571	0.8139	0.1862	0.8298	0.8139	0.8076	0.8076	0.1924	0.6214	0.8105
END	OneR	50	meta	0.797	0.203	0.819	0.797	0.7963	0.7963	0.2037	0.5933	0.7966	0.8139	0.1862	0.8298	0.8139	0.8076	0.8076	0.1924	0.6214	0.8105
Bagging	OneR	50	meta	0.8468	0.1532	0.8746	0.8468	0.8662	0.8662	0.1338	0.7127	0.8552	0.8085	0.1915	0.8298	0.8085	0.8085	0.8085	0.1915	0.617	0.8085
Dagging	OneR	50	meta	0.8051	0.1949	0.853	0.8051	0.8574	0.8574	0.1426	0.6604	0.823	0.8351	0.1649	0.8794	0.8351	0.8917	0.8917	0.1083	0.7246	0.8549
BFTree	InfoGain	10	trees	0.8481	0.1519	0.8728	0.8481	0.8616	0.8616	0.1384	0.7096	0.8542	0.8192	0.1809	0.844	0.8192	0.8264	0.8264	0.1736	0.6455	0.8226
ADTree	InfoGain	10	trees	0.8454	0.1546	0.8692	0.8454	0.8566	0.8566	0.1434	0.7019	0.8505	0.8032	0.1968	0.8227	0.8032	0.8001	0.8001	0.1999	0.6033	0.8016
LibSVM	OneR	100*	functions	0.5	0.5	0.6667	0.5	-0.1667	-0.1667	0.6667	-1	0.4	0.5	0.5	0.6667	0.5	0.3334	0.3334	0.6667	-1	0.4
ComplementNaiveBayes	OneR	100*	bayes	0.7231	0.2769	0.6935	0.7231	0.6985	0.6985	0.3015	0.4209	0.6863	0.6862	0.3138	0.6383	0.6862	0.67	0.67	0.33	0.3558	0.6357
ConjunctiveRule	InfoGain	10	rules	0.8132	0.1868	0.8226	0.8132	0.7994	0.7994	0.2006	0.6125	0.8051	0.7872	0.2128	0.7872	0.7872	0.7651	0.7651	0.235	0.5518	0.7715
NNge	InfoGain	10	rules	0.8508	0.1492	0.8817	0.8508	0.8784	0.8784	0.1216	0.7287	0.8622	0.8298	0.1702	0.8652	0.8298	0.8607	0.8607	0.1394	0.6897	0.8421
NaiveBayesMultinomialUpdateable	OneR	100*	bayes	0.7231	0.2769	0.6935	0.7231	0.6985	0.6985	0.3015	0.4209	0.6863	0.6862	0.3138	0.6383	0.6862	0.67	0.67	0.33	0.3558	0.6357
NaiveBayes	OneR	100*	bayes	0.8091	0.1909	0.8405	0.8091	0.8254	0.8254	0.1746	0.6343	0.8162	0.7979	0.2021	0.8369	0.7979	0.8258	0.8258	0.1743	0.623	0.8089
Logistic	OneR	100*	functions	0.7621	0.2379	0.7867	0.7621	0.76	0.76	0.24	0.5221	0.761	0.7926	0.2075	0.8227	0.7926	0.8029	0.8029	0.1972	0.5953	0.7972
BayesianLogisticRegression	OneR	100*	bayes	0.4946	0.5054	0.3297	0.4946	0.1655	0.1655	0.8345	-0.0848	0.248	0.5	0.5	0.3333	0.5	0.1667	0.1667	0.8334	-1	0.25
Ridor	InfoGain	10	rules	0.832	0.168	0.8548	0.832	0.8386	0.8386	0.1614	0.6706	0.8351	0.8351	0.1649	0.8511	0.8351	0.8317	0.8317	0.1684	0.6668	0.8333
RandomTree	InfoGain	10	trees	0.7823	0.2177	0.8047	0.7823	0.78	0.78	0.22	0.5623	0.7811	0.7447	0.2553	0.773	0.7447	0.7447	0.7447	0.2553	0.4894	0.7447
REPTree	InfoGain	10	trees	0.8185	0.1815	0.8405	0.8185	0.8212	0.8212	0.1788	0.6397	0.8198	0.7659	0.2341	0.8085	0.7659	0.7909	0.7909	0.2092	0.5562	0.7756
LADTree	InfoGain	10	trees	0.8481	0.1519	0.8638	0.8481	0.8463	0.8463	0.1537	0.6944	0.8472	0.8139	0.1862	0.8298	0.8139	0.8076	0.8076	0.1924	0.6214	0.8105
LMT	InfoGain	10	trees	0.836	0.164	0.871	0.836	0.8679	0.8679	0.1321	0.7032	0.8487	0.8244	0.1755	0.8652	0.8244	0.8663	0.8663	0.1337	0.6895	0.8401
NBTree	InfoGain	10	trees	0.8441	0.1559	0.862	0.8441	0.845	0.845	0.155	0.6891	0.8445	0.7926	0.2075	0.8156	0.7926	0.7926	0.7926	0.2075	0.5851	0.7926
RandomForest	InfoGain	10	trees	0.8454	0.1546	0.8656	0.8454	0.8503	0.8503	0.1497	0.6957	0.8478	0.8192	0.1809	0.8298	0.8192	0.8072	0.8072	0.1928	0.6262	0.8124
DecisionStump	InfoGain	10	trees	0.8226	0.1774	0.8262	0.8226	0.8037	0.8037	0.1963	0.626	0.8108	0.7872	0.2128	0.7872	0.7872	0.7651	0.7651	0.235	0.5518	0.7715
FT	InfoGain	10	trees	0.8454	0.1546	0.8674	0.8454	0.8534	0.8534	0.1466	0.6987	0.8491	0.8351	0.1649	0.8723	0.8351	0.8722	0.8722	0.1279	0.7063	0.8495
J48	InfoGain	10	trees	0.8427	0.1573	0.862	0.8427	0.8456	0.8456	0.1544	0.6883	0.8441	0.8192	0.1809	0.844	0.8192	0.8264	0.8264	0.1736	0.6455	0.8226
J48graft	InfoGain	10	trees	0.8468	0.1532	0.8674	0.8468	0.8526	0.8526	0.1474	0.6994	0.8496	0.8192	0.1809	0.844	0.8192	0.8264	0.8264	0.1736	0.6455	0.8226
VotedPerceptron	OneR	30	functions	0.6478	0.3522	0.6541	0.6478	0.6339	0.6339	0.3661	0.2814	0.6339	0.633	0.367	0.6525	0.633	0.6234	0.6234	0.3766	0.2562	0.6253
AdaBoostM1	OneR	10	meta	0.8481	0.1519	0.8728	0.8481	0.8616	0.8616	0.1384	0.7096	0.8542	0.7926	0.2075	0.8085	0.7926	0.784	0.784	0.2159	0.5766	0.7878
SPegasos	InfoGain	30	functions	0.5	0.5	0.6667	0.5	-0.1667	-0.1667	0.6667	-1	0.4	0.5	0.5	0.6667	0.5	0.3334	0.3334	0.6667	-1	0.4
KStar	OneR	30	lazy	0.7473	0.2527	0.81	0.7473	0.8109	0.8109	0.1891	0.5546	0.7651	0.6649	0.3351	0.7447	0.6649	0.7243	0.7243	0.2757	0.3846	0.6758
MultilayerPerceptron	OneR	30	functions	0.8199	0.1801	0.8513	0.8199	0.839	0.839	0.161	0.6586	0.828	0.8298	0.1702	0.8298	0.8298	0.808	0.808	0.192	0.6374	0.8157
RBFNetwork	OneR	30	functions	0.8011	0.1989	0.8297	0.8011	0.8108	0.8108	0.1892	0.6118	0.8055	0.7447	0.2553	0.8085	0.7447	0.8099	0.8099	0.1901	0.5508	0.7626
SimpleLogistic	OneR	30	functions	0.8145	0.1855	0.8584	0.8145	0.8602	0.8602	0.1398	0.6732	0.8309	0.8298	0.1703	0.8723	0.8298	0.8787	0.8787	0.1214	0.7067	0.8474
ConjunctiveRule	SymmerU	50	rules	0.8132	0.1868	0.8226	0.8132	0.7994	0.7994	0.2006	0.6125	0.8051	0.7872	0.2128	0.7872	0.7872	0.7651	0.7651	0.235	0.5518	0.7715
LWL	OneR	30	lazy	0.8293	0.1707	0.8315	0.8293	0.8095	0.8095	0.1905	0.6385	0.8169	0.7872	0.2128	0.7872	0.7872	0.7651	0.7651	0.235	0.5518	0.7715
AdaBoostM1	OneR	30	meta	0.8535	0.1465	0.8781	0.8535	0.8684	0.8684	0.1316	0.7217	0.8602	0.8032	0.1968	0.8156	0.8032	0.7918	0.7918	0.2082	0.5949	0.7967
ADTree	InfoGain	100*	trees	0.8468	0.1532	0.8674	0.8468	0.8526	0.8526	0.1474	0.6994	0.8496	0.8245	0.1755	0.844	0.8245	0.8245	0.8245	0.1755	0.6489	0.8245
NNge	ReliefF	10	rules	0.8078	0.1922	0.8315	0.8078	0.8112	0.8112	0.1888	0.619	0.8094	0.7926	0.2075	0.8156	0.7926	0.7926	0.7926	0.2075	0.5851	0.7926
IBk	InfoGain	30	lazy	0.797	0.203	0.828	0.797	0.8096	0.8096	0.1904	0.6065	0.8026	0.7872	0.2128	0.8156	0.7872	0.7938	0.7938	0.2063	0.5809	0.7903
PART	ReliefF	10	rules	0.8508	0.1492	0.8656	0.8508	0.848	0.848	0.152	0.6988	0.8494	0.8139	0.1862	0.844	0.8139	0.829	0.829	0.171	0.6427	0.8205
MultilayerPerceptron	InfoGain	30	functions	0.8468	0.1532	0.871	0.8468	0.8591	0.8591	0.1409	0.7058	0.8524	0.8351	0.1649	0.844	0.8351	0.8226	0.8226	0.1775	0.6575	0.828
VotedPerceptron	InfoGain	30	functions	0.6465	0.3535	0.6272	0.6465	0.6303	0.6303	0.3697	0.2763	0.6177	0.6171	0.383	0.6028	0.6171	0.604	0.604	0.396	0.2207	0.592
ZeroR	ReliefF	10	rules	0.5	0.5	0.6667	0.5	-0.1667	-0.1667	0.6667	-1	0.4	0.5	0.5	0.6667	0.5	0.3334	0.3334	0.6667	-1	0.4
LibSVM	OneR	10	functions	0.5	0.5	0.6667	0.5	-0.1667	-0.1667	0.6667	-1	0.4	0.5	0.5	0.6667	0.5	0.3334	0.3334	0.6667	-1	0.4
MultilayerPerceptron	OneR	10	functions	0.8535	0.1465	0.8853	0.8535	0.8841	0.8841	0.1159	0.737	0.866	0.8298	0.1702	0.8298	0.8298	0.808	0.808	0.192	0.6374	0.8157
Logistic	OneR	10	functions	0.8387	0.1613	0.8799	0.8387	0.8879	0.8879	0.1121	0.7249	0.8566	0.8244	0.1755	0.8652	0.8244	0.8663	0.8663	0.1337	0.6895	0.8401
NaiveBayes	OneR	10	bayes	0.7836	0.2164	0.8423	0.7836	0.8565	0.8565	0.1435	0.636	0.805	0.7819	0.2181	0.8369	0.7819	0.8424	0.8424	0.1577	0.6213	0.8008
BayesNet	OneR	10	bayes	0.8414	0.1586	0.8763	0.8414	0.8752	0.8752	0.1248	0.7158	0.8548	0.8351	0.1649	0.8652	0.8351	0.8561	0.8561	0.144	0.6908	0.8441
BayesianLogisticRegression	OneR	10	bayes	0.5	0.5	0.3333	0.5	-0.3333	-0.3333	0.8333	-1	0.25	0.5	0.5	0.3333	0.5	0.1667	0.1667	0.8334	-1	0.25
DMNBtext	OneR	10	bayes	0.7272	0.2728	0.7742	0.7272	0.7487	0.7487	0.2513	0.4753	0.7353	0.6969	0.3032	0.766	0.6969	0.7493	0.7493	0.2508	0.443	0.7099
ComplementNaiveBayes	OneR	10	bayes	0.789	0.211	0.8405	0.789	0.8433	0.8433	0.1567	0.63	0.8068	0.7766	0.2235	0.8369	0.7766	0.8504	0.8504	0.1497	0.6226	0.7978
NaiveBayesMultinomialUpdateable	OneR	10	bayes	0.7863	0.2137	0.8369	0.7863	0.8369	0.8369	0.1631	0.6211	0.8032	0.7713	0.2288	0.8298	0.7713	0.8363	0.8363	0.1637	0.6041	0.7906
NaiveBayesMultinomial	OneR	10	bayes	0.7903	0.2097	0.8423	0.7903	0.8466	0.8466	0.1534	0.6344	0.8086	0.7766	0.2235	0.8369	0.7766	0.8504	0.8504	0.1497	0.6226	0.7978
J48	ReliefF	100*	trees	0.8051	0.1949	0.828	0.8051	0.8068	0.8068	0.1932	0.6119	0.8059	0.7873	0.2128	0.8085	0.7873	0.7843	0.7843	0.2158	0.5715	0.7857
J48graft	ReliefF	100*	trees	0.8132	0.1868	0.8423	0.8132	0.8264	0.8264	0.1736	0.6394	0.819	0.7926	0.2075	0.8156	0.7926	0.7926	0.7926	0.2075	0.5851	0.7926
DecisionStump	ReliefF	100*	trees	0.8226	0.1774	0.8262	0.8226	0.8037	0.8037	0.1963	0.626	0.8108	0.7872	0.2128	0.7872	0.7872	0.7651	0.7651	0.235	0.5518	0.7715
FT	ReliefF	100*	trees	0.8132	0.1868	0.8333	0.8132	0.8123	0.8123	0.1877	0.6255	0.8128	0.766	0.2341	0.7801	0.766	0.7539	0.7539	0.2462	0.5197	0.7588
NBTree	ReliefF	100*	trees	0.8038	0.1962	0.828	0.8038	0.8071	0.8071	0.1929	0.6109	0.8054	0.7554	0.2447	0.7872	0.7554	0.7611	0.7611	0.2389	0.5164	0.758
RandomForest	ReliefF	100*	trees	0.8347	0.1653	0.8566	0.8347	0.8403	0.8403	0.1597	0.675	0.8374	0.7978	0.2022	0.8014	0.7978	0.7782	0.7782	0.2218	0.5758	0.785
LADTree	ReliefF	100*	trees	0.8212	0.1788	0.8477	0.8212	0.8316	0.8316	0.1684	0.6528	0.826	0.7873	0.2128	0.7943	0.7873	0.7702	0.7702	0.2299	0.5571	0.7764
AdaBoostM1	ReliefF	50	meta	0.7997	0.2003	0.8315	0.7997	0.8144	0.8144	0.1856	0.614	0.8061	0.8085	0.1915	0.8369	0.8085	0.8194	0.8194	0.1807	0.6278	0.8135
DecisionTable	ReliefF	30	rules	0.7997	0.2003	0.8226	0.7997	0.8005	0.8005	0.1995	0.6003	0.8001	0.7978	0.2022	0.8298	0.7978	0.8122	0.8122	0.1878	0.61	0.8041
RandomTree	ReliefF	100*	trees	0.7177	0.2823	0.7634	0.7177	0.7348	0.7348	0.2652	0.4523	0.7244	0.7022	0.2979	0.7447	0.7022	0.7119	0.7119	0.2881	0.4139	0.7063
REPTree	ReliefF	100*	trees	0.8118	0.1882	0.8405	0.8118	0.8239	0.8239	0.1761	0.6357	0.8173	0.8245	0.1755	0.844	0.8245	0.8245	0.8245	0.1755	0.6489	0.8245
Bagging	SymmerU	50	meta	0.8481	0.1519	0.8746	0.8481	0.8652	0.8652	0.1348	0.7131	0.8556	0.8086	0.1915	0.8227	0.8086	0.7996	0.7996	0.2005	0.608	0.8036
DMNBtext	InfoGain	30	bayes	0.7742	0.2258	0.8172	0.7742	0.8025	0.8025	0.1975	0.576	0.785	0.8245	0.1756	0.8582	0.8245	0.8497	0.8497	0.1503	0.6736	0.8348
DTNB	SymmerU	30	rules	0.8508	0.1492	0.8692	0.8508	0.8537	0.8537	0.1463	0.7045	0.8522	0.8298	0.1702	0.8582	0.8298	0.8458	0.8458	0.1542	0.6754	0.8368
LogitBoost	SymmerU	10	meta	0.8629	0.1371	0.8853	0.8629	0.8758	0.8758	0.1242	0.7386	0.8688	0.7926	0.2075	0.8156	0.7926	0.7926	0.7926	0.2075	0.5851	0.7926
ConjunctiveRule	SymmerU	30	rules	0.8132	0.1868	0.8226	0.8132	0.7994	0.7994	0.2006	0.6125	0.8051	0.7872	0.2128	0.7872	0.7872	0.7651	0.7651	0.235	0.5518	0.7715
IB1	InfoGain	50	lazy	0.7863	0.2137	0.8226	0.7863	0.8055	0.8055	0.1945	0.5915	0.7943	0.7766	0.2234	0.8085	0.7766	0.7864	0.7864	0.2137	0.5628	0.781
VotedPerceptron	InfoGain	50	functions	0.6586	0.3414	0.6953	0.6586	0.6578	0.6578	0.3422	0.3164	0.6582	0.6649	0.3351	0.6525	0.6649	0.6468	0.6468	0.3533	0.3111	0.6403
KStar	InfoGain	50	lazy	0.7097	0.2903	0.7867	0.7097	0.7924	0.7924	0.2076	0.4952	0.727	0.7181	0.2819	0.7943	0.7181	0.8045	0.8045	0.1955	0.5154	0.7366
IBk	InfoGain	50	lazy	0.7863	0.2137	0.8226	0.7863	0.8055	0.8055	0.1945	0.5915	0.7943	0.7766	0.2234	0.8085	0.7766	0.7864	0.7864	0.2137	0.5628	0.781
RBFNetwork	InfoGain	50	functions	0.793	0.207	0.8333	0.793	0.822	0.822	0.178	0.6144	0.8043	0.7713	0.2287	0.8085	0.7713	0.7883	0.7883	0.2118	0.5593	0.7784
MultilayerPerceptron	InfoGain	50	functions	0.8468	0.1532	0.8728	0.8468	0.8626	0.8626	0.1374	0.7092	0.8538	0.8404	0.1596	0.8582	0.8404	0.8404	0.8404	0.1596	0.6809	0.8404
SPegasos	InfoGain	50	functions	0.5	0.5	0.6667	0.5	-0.1667	-0.1667	0.6667	-1	0.4	0.5	0.5	0.6667	0.5	0.3334	0.3334	0.6667	-1	0.4
SimpleLogistic	InfoGain	50	functions	0.8239	0.1761	0.862	0.8239	0.8588	0.8588	0.1412	0.6818	0.8374	0.8458	0.1543	0.8723	0.8458	0.8625	0.8625	0.1375	0.708	0.8532
Bagging	SymmerU	10	meta	0.8535	0.1465	0.8781	0.8535	0.8684	0.8684	0.1316	0.7217	0.8602	0.8032	0.1968	0.8298	0.8032	0.8101	0.8101	0.1899	0.6132	0.8064
AdaBoostM1	InfoGain	50	meta	0.8468	0.1532	0.8692	0.8468	0.8558	0.8558	0.1442	0.7025	0.851	0.8351	0.1649	0.8369	0.8351	0.8151	0.8151	0.1849	0.6499	0.8226
LWL	InfoGain	50	lazy	0.8266	0.1734	0.8297	0.8266	0.8075	0.8075	0.1925	0.6339	0.8147	0.7872	0.2128	0.7872	0.7872	0.7651	0.7651	0.235	0.5518	0.7715
ZeroR	SymmerU	30	rules	0.5	0.5	0.6667	0.5	-0.1667	-0.1667	0.6667	-1	0.4	0.5	0.5	0.6667	0.5	0.3334	0.3334	0.6667	-1	0.4
NBTree	OneR	10	trees	0.8401	0.1599	0.8674	0.8401	0.8567	0.8567	0.1433	0.6966	0.8474	0.8245	0.1755	0.8511	0.8245	0.8359	0.8359	0.1641	0.6602	0.8297
RandomForest	OneR	10	trees	0.8602	0.1398	0.8781	0.8602	0.8642	0.8642	0.1358	0.7244	0.8622	0.8511	0.1489	0.8794	0.8511	0.873	0.873	0.127	0.7237	0.8605
LADTree	OneR	10	trees	0.8495	0.1505	0.8692	0.8495	0.8544	0.8544	0.1456	0.7038	0.8518	0.8032	0.1968	0.8369	0.8032	0.8222	0.8222	0.1779	0.6251	0.8112
LMT	OneR	10	trees	0.8226	0.1774	0.8656	0.8226	0.8694	0.8694	0.1306	0.6904	0.8395	0.8244	0.1755	0.8652	0.8244	0.8663	0.8663	0.1337	0.6895	0.8401
J48	OneR	10	trees	0.8481	0.1519	0.8674	0.8481	0.852	0.852	0.148	0.7001	0.85	0.8245	0.1755	0.844	0.8245	0.8245	0.8245	0.1755	0.6489	0.8245
Decorate	SymmerU	10	meta	0.8602	0.1398	0.8817	0.8602	0.8707	0.8707	0.1293	0.7309	0.8651	0.8245	0.1755	0.844	0.8245	0.8245	0.8245	0.1755	0.6489	0.8245
DecisionStump	OneR	10	trees	0.8226	0.1774	0.8262	0.8226	0.8037	0.8037	0.1963	0.626	0.8108	0.7872	0.2128	0.7872	0.7872	0.7651	0.7651	0.235	0.5518	0.7715
IB1	OneR	30	lazy	0.8078	0.1922	0.8387	0.8078	0.8229	0.8229	0.1771	0.6305	0.8144	0.7022	0.2979	0.7447	0.7022	0.7119	0.7119	0.2881	0.4139	0.7063
END	SymmerU	10	meta	0.8495	0.1505	0.8692	0.8495	0.8544	0.8544	0.1456	0.7038	0.8518	0.8139	0.1862	0.8369	0.8139	0.8173	0.8173	0.1827	0.6311	0.8155
Decorate	OneR	10	meta	0.8401	0.1599	0.8656	0.8401	0.8533	0.8533	0.1467	0.6932	0.846	0.8351	0.1649	0.8652	0.8351	0.8561	0.8561	0.144	0.6908	0.8441
RandomTree	OneR	10	trees	0.7836	0.2164	0.8082	0.7836	0.7844	0.7844	0.2156	0.568	0.784	0.7978	0.2022	0.8227	0.7978	0.8012	0.8012	0.1989	0.599	0.7995
REPTree	OneR	10	trees	0.836	0.164	0.8495	0.836	0.8292	0.8292	0.1708	0.6652	0.8324	0.8192	0.1809	0.8511	0.8192	0.8391	0.8391	0.1609	0.658	0.8276
ZeroR	GainRatio	30	rules	0.5	0.5	0.6667	0.5	-0.1667	-0.1667	0.6667	-1	0.4	0.5	0.5	0.6667	0.5	0.3334	0.3334	0.6667	-1	0.4
Ridor	GainRatio	30	rules	0.8172	0.1828	0.8513	0.8172	0.8409	0.8409	0.1591	0.6577	0.827	0.7926	0.2075	0.8156	0.7926	0.7926	0.7926	0.2075	0.5851	0.7926
PART	GainRatio	30	rules	0.8253	0.1747	0.853	0.8253	0.839	0.839	0.161	0.6641	0.8314	0.7873	0.2128	0.8227	0.7873	0.8052	0.8052	0.1948	0.5922	0.7948
Dagging	ReliefF	30	meta	0.8078	0.1922	0.853	0.8078	0.8541	0.8541	0.1459	0.6602	0.8242	0.7234	0.2766	0.7943	0.7234	0.7964	0.7964	0.2036	0.5147	0.741
NNge	GainRatio	30	rules	0.8642	0.1358	0.8638	0.8642	0.8436	0.8436	0.1564	0.7075	0.8516	0.8298	0.1703	0.844	0.8298	0.8232	0.8232	0.1768	0.653	0.8263
DTNB	GainRatio	30	rules	0.828	0.172	0.8548	0.828	0.8407	0.8407	0.1593	0.6685	0.8337	0.7978	0.2022	0.8298	0.7978	0.8122	0.8122	0.1878	0.61	0.8041
DecisionTable	GainRatio	30	rules	0.8024	0.1976	0.8315	0.8024	0.8132	0.8132	0.1868	0.6155	0.8073	0.8139	0.1862	0.8369	0.8139	0.8173	0.8173	0.1827	0.6311	0.8155
ConjunctiveRule	GainRatio	30	rules	0.8145	0.1855	0.8226	0.8145	0.7995	0.7995	0.2005	0.6138	0.8056	0.7872	0.2128	0.7872	0.7872	0.7651	0.7651	0.235	0.5518	0.7715
RandomForest	GainRatio	50	trees	0.8629	0.1371	0.8817	0.8629	0.869	0.869	0.131	0.7319	0.8658	0.8245	0.1755	0.844	0.8245	0.8245	0.8245	0.1755	0.6489	0.8245
RBFNetwork	ReliefF	50	functions	0.8024	0.1976	0.8315	0.8024	0.8132	0.8132	0.1868	0.6155	0.8073	0.7713	0.2288	0.7943	0.7713	0.7685	0.7685	0.2315	0.5398	0.7698
BFTree	GainRatio	30	trees	0.8199	0.1801	0.8495	0.8199	0.8356	0.8356	0.1644	0.6553	0.8268	0.7713	0.2287	0.8014	0.7713	0.7775	0.7775	0.2226	0.5487	0.7742
ADTree	GainRatio	30	trees	0.8333	0.1667	0.8548	0.8333	0.838	0.838	0.162	0.6713	0.8356	0.8192	0.1809	0.8298	0.8192	0.8072	0.8072	0.1928	0.6262	0.8124
DTNB	ReliefF	30	rules	0.8239	0.1761	0.8369	0.8239	0.8152	0.8152	0.1848	0.639	0.8191	0.8032	0.1968	0.8156	0.8032	0.7918	0.7918	0.2082	0.5949	0.7967
MultiBoostAB	OneR	10	meta	0.8427	0.1573	0.8602	0.8427	0.8427	0.8427	0.1573	0.6855	0.8427	0.8032	0.1968	0.8227	0.8032	0.8001	0.8001	0.1999	0.6033	0.8016
SPegasos	OneR	30	functions	0.5	0.5	0.6667	0.5	-0.1667	-0.1667	0.6667	-1	0.4	0.5	0.5	0.6667	0.5	0.3334	0.3334	0.6667	-1	0.4
AdaBoostM1	SymmerU	50	meta	0.8481	0.1519	0.8692	0.8481	0.8551	0.8551	0.1449	0.7031	0.8514	0.8085	0.1915	0.8298	0.8085	0.8085	0.8085	0.1915	0.617	0.8085
SPegasos	GainRatio	100*	functions	0.5	0.5	0.6667	0.5	-0.1667	-0.1667	0.6667	-1	0.4	0.5	0.5	0.6667	0.5	0.3334	0.3334	0.6667	-1	0.4
VFI	OneR	10	misc	0.7634	0.2366	0.7885	0.7634	0.762	0.762	0.238	0.5255	0.7627	0.6968	0.3032	0.6879	0.6968	0.676	0.676	0.324	0.3722	0.6742
RBFNetwork	GainRatio	100*	functions	0.793	0.207	0.8405	0.793	0.8385	0.8385	0.1615	0.6299	0.8089	0.7447	0.2554	0.8156	0.7447	0.8329	0.8329	0.1672	0.5707	0.7659
ConjunctiveRule	SymmerU	100*	rules	0.8132	0.1868	0.8226	0.8132	0.7994	0.7994	0.2006	0.6125	0.8051	0.7872	0.2128	0.7872	0.7872	0.7651	0.7651	0.235	0.5518	0.7715
DecisionTable	SymmerU	100*	rules	0.7782	0.2218	0.8136	0.7782	0.7938	0.7938	0.2062	0.5718	0.7849	0.8032	0.1968	0.8298	0.8032	0.8101	0.8101	0.1899	0.6132	0.8064
DTNB	SymmerU	100*	rules	0.8011	0.1989	0.8315	0.8011	0.8138	0.8138	0.1862	0.6147	0.8067	0.8192	0.1809	0.8511	0.8192	0.8391	0.8391	0.1609	0.658	0.8276
AdaBoostM1	ReliefF	10	meta	0.8172	0.1828	0.8405	0.8172	0.8216	0.8216	0.1784	0.6388	0.8193	0.8032	0.1968	0.8298	0.8032	0.8101	0.8101	0.1899	0.6132	0.8064
OneR	SymmerU	100*	rules	0.7702	0.2298	0.8011	0.7702	0.7772	0.7772	0.2228	0.5473	0.7734	0.75	0.25	0.766	0.75	0.7387	0.7387	0.2613	0.4885	0.7432
PART	SymmerU	100*	rules	0.7997	0.2003	0.8208	0.7997	0.7981	0.7981	0.2019	0.5979	0.7989	0.8085	0.1915	0.8298	0.8085	0.8085	0.8085	0.1915	0.617	0.8085
Ridor	SymmerU	100*	rules	0.8253	0.1747	0.8566	0.8253	0.8459	0.8459	0.1541	0.6708	0.834	0.7713	0.2288	0.766	0.7713	0.7466	0.7466	0.2534	0.5173	0.7515
ZeroR	SymmerU	100*	rules	0.5	0.5	0.6667	0.5	-0.1667	-0.1667	0.6667	-1	0.4	0.5	0.5	0.6667	0.5	0.3334	0.3334	0.6667	-1	0.4
ADTree	SymmerU	100*	trees	0.836	0.164	0.8638	0.836	0.8525	0.8525	0.1475	0.6883	0.8433	0.7979	0.2021	0.8156	0.7979	0.792	0.792	0.2081	0.5898	0.7947
SPegasos	ReliefF	10	functions	0.5	0.5	0.6667	0.5	-0.1667	-0.1667	0.6667	-1	0.4	0.5	0.5	0.6667	0.5	0.3334	0.3334	0.6667	-1	0.4
MultilayerPerceptron	ReliefF	10	functions	0.8535	0.1465	0.8728	0.8535	0.8584	0.8584	0.1416	0.7119	0.8559	0.8458	0.1543	0.8652	0.8458	0.8495	0.8495	0.1505	0.6953	0.8476
RBFNetwork	ReliefF	10	functions	0.7728	0.2272	0.8226	0.7728	0.8153	0.8153	0.1847	0.5866	0.7874	0.7128	0.2873	0.773	0.7128	0.7534	0.7534	0.2466	0.4644	0.7249
IBk	ReliefF	10	lazy	0.7419	0.2581	0.7814	0.7419	0.7555	0.7555	0.2445	0.4972	0.7476	0.7873	0.2128	0.8014	0.7873	0.7765	0.7765	0.2235	0.5636	0.7811
KStar	ReliefF	10	lazy	0.6962	0.3038	0.7616	0.6962	0.7402	0.7402	0.2598	0.4342	0.7081	0.7607	0.2394	0.8085	0.7607	0.7942	0.7942	0.2058	0.5538	0.7727
VotedPerceptron	ReliefF	10	functions	0.5	0.5	0.6667	0.5	-0.1667	-0.1667	0.6667	-1	0.4	0.5	0.5	0.6667	0.5	0.3334	0.3334	0.6667	-1	0.4
IB1	ReliefF	10	lazy	0.7419	0.2581	0.7814	0.7419	0.7555	0.7555	0.2445	0.4972	0.7476	0.7873	0.2128	0.8014	0.7873	0.7765	0.7765	0.2235	0.5636	0.7811
ComplementNaiveBayes	GainRatio	50	bayes	0.7258	0.2742	0.7652	0.7258	0.7361	0.7361	0.2639	0.4618	0.7302	0.7554	0.2447	0.7872	0.7554	0.7611	0.7611	0.2389	0.5164	0.758
DMNBtext	GainRatio	50	bayes	0.797	0.203	0.8405	0.797	0.8344	0.8344	0.1656	0.6304	0.8108	0.7819	0.2181	0.8298	0.7819	0.8237	0.8237	0.1764	0.6041	0.7966
NaiveBayesMultinomial	GainRatio	50	bayes	0.7258	0.2742	0.7652	0.7258	0.7361	0.7361	0.2639	0.4618	0.7302	0.7554	0.2447	0.7872	0.7554	0.7611	0.7611	0.2389	0.5164	0.758
NaiveBayesMultinomialUpdateable	GainRatio	50	bayes	0.7272	0.2728	0.7652	0.7272	0.736	0.736	0.264	0.463	0.731	0.7554	0.2447	0.7872	0.7554	0.7611	0.7611	0.2389	0.5164	0.758
NaiveBayes	GainRatio	50	bayes	0.8226	0.1774	0.8584	0.8226	0.8518	0.8518	0.1482	0.6738	0.8343	0.8032	0.1968	0.844	0.8032	0.8367	0.8367	0.1633	0.639	0.816
Logistic	GainRatio	50	functions	0.8185	0.1815	0.8495	0.8185	0.8364	0.8364	0.1636	0.6547	0.8262	0.8086	0.1915	0.8511	0.8086	0.8483	0.8483	0.1518	0.6555	0.8232
Ridor	OneR	10	rules	0.8374	0.1626	0.8656	0.8374	0.8551	0.8551	0.1449	0.6922	0.8451	0.8245	0.1755	0.8511	0.8245	0.8359	0.8359	0.1641	0.6602	0.8297
BayesNet	GainRatio	50	bayes	0.8548	0.1452	0.8835	0.8548	0.8786	0.8786	0.1214	0.7331	0.8649	0.8085	0.1915	0.8369	0.8085	0.8194	0.8194	0.1807	0.6278	0.8135
SPegasos	ReliefF	50	functions	0.5	0.5	0.6667	0.5	-0.1667	-0.1667	0.6667	-1	0.4	0.5	0.5	0.6667	0.5	0.3334	0.3334	0.6667	-1	0.4
LibSVM	GainRatio	50	functions	0.5	0.5	0.6667	0.5	-0.1667	-0.1667	0.6667	-1	0.4	0.5	0.5	0.6667	0.5	0.3334	0.3334	0.6667	-1	0.4
NaiveBayesMultinomial	OneR	30	bayes	0.7715	0.2285	0.8154	0.7715	0.8007	0.8007	0.1993	0.5715	0.7825	0.7553	0.2447	0.8014	0.7553	0.7836	0.7836	0.2165	0.5381	0.7657
LibSVM	InfoGain	100*	functions	0.5	0.5	0.6667	0.5	-0.1667	-0.1667	0.6667	-1	0.4	0.5	0.5	0.6667	0.5	0.3334	0.3334	0.6667	-1	0.4
LWL	GainRatio	100*	lazy	0.8253	0.1747	0.8297	0.8253	0.8074	0.8074	0.1926	0.6324	0.8143	0.7872	0.2128	0.7872	0.7872	0.7651	0.7651	0.235	0.5518	0.7715
BayesianLogisticRegression	InfoGain	100*	bayes	0.4987	0.5013	0.3351	0.4987	0.4664	0.4664	0.5336	-0.0134	0.2569	0.5	0.5	0.3333	0.5	0.1667	0.1667	0.8334	-1	0.25
BayesNet	InfoGain	100*	bayes	0.8495	0.1505	0.8656	0.8495	0.8485	0.8485	0.1515	0.698	0.849	0.8192	0.1809	0.8298	0.8192	0.8072	0.8072	0.1928	0.6262	0.8124
NaiveBayes	InfoGain	100*	bayes	0.8185	0.1815	0.8548	0.8185	0.8474	0.8474	0.1526	0.6653	0.8301	0.7926	0.2074	0.8298	0.7926	0.8153	0.8153	0.1848	0.6074	0.8018
Logistic	InfoGain	100*	functions	0.7742	0.2258	0.7975	0.7742	0.772	0.772	0.228	0.5462	0.7731	0.7819	0.2181	0.8014	0.7819	0.7763	0.7763	0.2237	0.5582	0.7789
ZeroR	ReliefF	30	rules	0.5	0.5	0.6667	0.5	-0.1667	-0.1667	0.6667	-1	0.4	0.5	0.5	0.6667	0.5	0.3334	0.3334	0.6667	-1	0.4
NaiveBayesMultinomialUpdateable	InfoGain	100*	bayes	0.8051	0.1949	0.8226	0.8051	0.7997	0.7997	0.2003	0.6048	0.8022	0.7766	0.2234	0.7872	0.7766	0.762	0.762	0.238	0.5384	0.7676
ComplementNaiveBayes	InfoGain	100*	bayes	0.8078	0.1922	0.8244	0.8078	0.8016	0.8016	0.1984	0.6094	0.8045	0.7766	0.2234	0.7872	0.7766	0.762	0.762	0.238	0.5384	0.7676
DMNBtext	InfoGain	100*	bayes	0.8253	0.1747	0.8584	0.8253	0.8496	0.8496	0.1504	0.6744	0.8353	0.8245	0.1756	0.8582	0.8245	0.8497	0.8497	0.1503	0.6736	0.8348
OneR	GainRatio	50	rules	0.7702	0.2298	0.8011	0.7702	0.7772	0.7772	0.2228	0.5473	0.7734	0.75	0.25	0.766	0.75	0.7387	0.7387	0.2613	0.4885	0.7432
PART	GainRatio	50	rules	0.8427	0.1573	0.8584	0.8427	0.84	0.84	0.16	0.6828	0.8414	0.8458	0.1543	0.8723	0.8458	0.8625	0.8625	0.1375	0.708	0.8532
Ridor	GainRatio	50	rules	0.8374	0.1626	0.8584	0.8374	0.8421	0.8421	0.1579	0.6794	0.8396	0.8139	0.1862	0.844	0.8139	0.829	0.829	0.171	0.6427	0.8205
ZeroR	GainRatio	50	rules	0.5	0.5	0.6667	0.5	-0.1667	-0.1667	0.6667	-1	0.4	0.5	0.5	0.6667	0.5	0.3334	0.3334	0.6667	-1	0.4
ConjunctiveRule	GainRatio	50	rules	0.8132	0.1868	0.8226	0.8132	0.7994	0.7994	0.2006	0.6125	0.8051	0.7872	0.2128	0.7872	0.7872	0.7651	0.7651	0.235	0.5518	0.7715
DecisionTable	GainRatio	50	rules	0.7957	0.2043	0.8262	0.7957	0.8072	0.8072	0.1928	0.6028	0.8008	0.8192	0.1809	0.8369	0.8192	0.8159	0.8159	0.1842	0.635	0.8175
DTNB	GainRatio	50	rules	0.8629	0.1371	0.8817	0.8629	0.869	0.869	0.131	0.7319	0.8658	0.8351	0.1649	0.8652	0.8351	0.8561	0.8561	0.144	0.6908	0.8441
NNge	GainRatio	50	rules	0.8589	0.1411	0.8656	0.8589	0.846	0.846	0.154	0.7048	0.8517	0.8138	0.1862	0.8156	0.8138	0.7931	0.7931	0.2069	0.6066	0.8004
ADTree	GainRatio	50	trees	0.8374	0.1626	0.8584	0.8374	0.8421	0.8421	0.1579	0.6794	0.8396	0.8245	0.1755	0.8369	0.8245	0.8151	0.8151	0.185	0.6395	0.8193
BFTree	GainRatio	50	trees	0.8427	0.1573	0.8674	0.8427	0.8549	0.8549	0.1451	0.6976	0.8483	0.8192	0.1809	0.844	0.8192	0.8264	0.8264	0.1736	0.6455	0.8226
LWL	InfoGain	30	lazy	0.8293	0.1707	0.8315	0.8293	0.8095	0.8095	0.1905	0.6385	0.8169	0.7872	0.2128	0.7872	0.7872	0.7651	0.7651	0.235	0.5518	0.7715
AdaBoostM1	GainRatio	30	meta	0.8333	0.1667	0.862	0.8333	0.8508	0.8508	0.1492	0.6839	0.841	0.8032	0.1968	0.8227	0.8032	0.8001	0.8001	0.1999	0.6033	0.8016
LADTree	InfoGain	30	trees	0.8347	0.1653	0.8566	0.8347	0.8403	0.8403	0.1597	0.675	0.8374	0.8139	0.1862	0.8369	0.8139	0.8173	0.8173	0.1827	0.6311	0.8155
DTNB	ReliefF	10	rules	0.8266	0.1734	0.8477	0.8266	0.8293	0.8293	0.1707	0.6559	0.8279	0.75	0.25	0.7801	0.75	0.7528	0.7528	0.2473	0.5027	0.7514
BayesianLogisticRegression	SymmerU	30	bayes	0.5349	0.4651	0.3961	0.5349	0.5903	0.5903	0.4097	0.1124	0.3597	0.516	0.4841	0.3759	0.516	0.5456	0.5456	0.4545	0.0539	0.3349
BayesNet	SymmerU	30	bayes	0.8589	0.1411	0.8817	0.8589	0.8716	0.8716	0.1284	0.7304	0.8647	0.8298	0.1702	0.8511	0.8298	0.8334	0.8334	0.1666	0.6632	0.8316
J48	GainRatio	100*	trees	0.8226	0.1774	0.8548	0.8226	0.8442	0.8442	0.1558	0.6664	0.8317	0.7766	0.2234	0.8156	0.7766	0.798	0.798	0.202	0.5742	0.7853
ZeroR	ReliefF	100*	rules	0.5	0.5	0.6667	0.5	-0.1667	-0.1667	0.6667	-1	0.4	0.5	0.5	0.6667	0.5	0.3334	0.3334	0.6667	-1	0.4
DTNB	OneR	100*	rules	0.8078	0.1922	0.8351	0.8078	0.8168	0.8168	0.1832	0.6245	0.8119	0.8351	0.1649	0.8652	0.8351	0.8561	0.8561	0.144	0.6908	0.8441
Logistic	SymmerU	30	functions	0.8226	0.1774	0.8602	0.8226	0.8559	0.8559	0.1441	0.6777	0.8356	0.7926	0.2075	0.8369	0.7926	0.8303	0.8303	0.1698	0.6216	0.8063
BFTree	ReliefF	30	trees	0.8145	0.1855	0.8369	0.8145	0.8171	0.8171	0.1829	0.6316	0.8158	0.8298	0.1702	0.8511	0.8298	0.8334	0.8334	0.1666	0.6632	0.8316
NaiveBayesMultinomial	SymmerU	30	bayes	0.7473	0.2527	0.7867	0.7473	0.7621	0.7621	0.2379	0.5092	0.7535	0.7341	0.266	0.7872	0.7341	0.7687	0.7687	0.2313	0.5016	0.7457
END	GainRatio	100*	meta	0.8226	0.1774	0.8548	0.8226	0.8442	0.8442	0.1558	0.6664	0.8317	0.7766	0.2234	0.8156	0.7766	0.798	0.798	0.202	0.5742	0.7853
VFI	OneR	30	misc	0.7917	0.2083	0.8423	0.7917	0.8449	0.8449	0.1551	0.6343	0.8093	0.7979	0.2021	0.844	0.7979	0.842	0.842	0.158	0.6383	0.8135
NBTree	GainRatio	100*	trees	0.828	0.172	0.8548	0.828	0.8407	0.8407	0.1593	0.6685	0.8337	0.7553	0.2447	0.766	0.7553	0.7401	0.7401	0.2599	0.4952	0.7455
LogitBoost	OneR	30	meta	0.8522	0.1478	0.871	0.8522	0.8561	0.8561	0.1439	0.7082	0.854	0.7978	0.2022	0.8227	0.7978	0.8012	0.8012	0.1989	0.599	0.7995
FilteredClassifier	OneR	30	meta	0.8266	0.1734	0.8495	0.8266	0.8321	0.8321	0.1679	0.6587	0.8292	0.7553	0.2447	0.7943	0.7553	0.7713	0.7713	0.2287	0.5264	0.762
MultiClassClassifier	OneR	30	meta	0.8172	0.1828	0.853	0.8172	0.8447	0.8447	0.1553	0.6613	0.8283	0.8192	0.1809	0.8652	0.8192	0.873	0.873	0.127	0.6901	0.8378
DMNBtext	SymmerU	30	bayes	0.8078	0.1922	0.8459	0.8078	0.837	0.837	0.163	0.6441	0.8193	0.7713	0.2287	0.8156	0.7713	0.8013	0.8013	0.1987	0.5718	0.7825
Dagging	OneR	30	meta	0.8105	0.1895	0.8602	0.8105	0.8707	0.8707	0.1293	0.6785	0.8304	0.8351	0.1649	0.8794	0.8351	0.8917	0.8917	0.1083	0.7246	0.8549
Bagging	OneR	30	meta	0.8441	0.1559	0.8746	0.8441	0.8685	0.8685	0.1315	0.7121	0.8543	0.7873	0.2128	0.8085	0.7873	0.7843	0.7843	0.2158	0.5715	0.7857
END	OneR	30	meta	0.8427	0.1573	0.8638	0.8427	0.8485	0.8485	0.1515	0.6913	0.8455	0.8405	0.1596	0.8652	0.8405	0.8524	0.8524	0.1476	0.6927	0.8459
Decorate	OneR	30	meta	0.8562	0.1438	0.8835	0.8562	0.8774	0.8774	0.1226	0.7333	0.8653	0.8298	0.1702	0.8511	0.8298	0.8334	0.8334	0.1666	0.6632	0.8316
FilteredClassifier	SymmerU	10	meta	0.8333	0.1667	0.8584	0.8333	0.8441	0.8441	0.1559	0.6774	0.8383	0.7819	0.2181	0.8085	0.7819	0.785	0.785	0.215	0.5669	0.7834
NNge	SymmerU	30	rules	0.8589	0.1411	0.8728	0.8589	0.856	0.856	0.144	0.7149	0.8574	0.8298	0.1702	0.8369	0.8298	0.8149	0.8149	0.1851	0.6444	0.821
MultiBoostAB	SymmerU	10	meta	0.8427	0.1573	0.8566	0.8427	0.8375	0.8375	0.1625	0.6802	0.84	0.8032	0.1968	0.8156	0.8032	0.7918	0.7918	0.2082	0.5949	0.7967
MultiClassClassifier	SymmerU	10	meta	0.8401	0.1599	0.8781	0.8401	0.8813	0.8813	0.1187	0.7201	0.8557	0.8139	0.1861	0.8652	0.8139	0.8812	0.8812	0.1189	0.6917	0.8355
Ridor	SymmerU	30	rules	0.7849	0.2151	0.8172	0.7849	0.797	0.797	0.203	0.5818	0.7903	0.8245	0.1755	0.8369	0.8245	0.8151	0.8151	0.185	0.6395	0.8193
Dagging	SymmerU	10	meta	0.7809	0.2191	0.8423	0.7809	0.8612	0.8612	0.1388	0.6371	0.8035	0.7819	0.2181	0.844	0.7819	0.8653	0.8653	0.1347	0.6418	0.8051
OneR	SymmerU	30	rules	0.7702	0.2298	0.8011	0.7702	0.7772	0.7772	0.2228	0.5473	0.7734	0.75	0.25	0.766	0.75	0.7387	0.7387	0.2613	0.4885	0.7432
PART	SymmerU	30	rules	0.8293	0.1707	0.8566	0.8293	0.8432	0.8432	0.1568	0.6723	0.8355	0.7979	0.2021	0.8085	0.7979	0.7844	0.7844	0.2157	0.5821	0.7899
ADTree	SymmerU	30	trees	0.8589	0.1411	0.8871	0.8589	0.8829	0.8829	0.1171	0.7414	0.8691	0.8192	0.1809	0.8298	0.8192	0.8072	0.8072	0.1928	0.6262	0.8124
BFTree	SymmerU	30	trees	0.8427	0.1573	0.8692	0.8427	0.8584	0.8584	0.1416	0.7009	0.8497	0.7978	0.2022	0.8298	0.7978	0.8122	0.8122	0.1878	0.61	0.8041
HyperPipes	SymmerU	10	misc	0.5672	0.4328	0.4319	0.5672	0.6451	0.6451	0.3549	0.1975	0.4039	0.5266	0.4735	0.383	0.5266	0.5822	0.5822	0.4178	0.0935	0.3399
VFI	SymmerU	10	misc	0.7016	0.2984	0.7921	0.7016	0.8312	0.8312	0.1688	0.5168	0.7208	0.6383	0.3617	0.7518	0.6383	0.8055	0.8055	0.1945	0.4111	0.6423
J48graft	ReliefF	50	trees	0.793	0.207	0.819	0.793	0.7971	0.7971	0.2029	0.5901	0.795	0.8086	0.1915	0.8227	0.8086	0.7996	0.7996	0.2005	0.608	0.8036
J48	ReliefF	50	trees	0.7796	0.2204	0.8029	0.7796	0.7781	0.7781	0.2219	0.5577	0.7788	0.8086	0.1915	0.8227	0.8086	0.7996	0.7996	0.2005	0.608	0.8036
FT	ReliefF	50	trees	0.8454	0.1546	0.8692	0.8454	0.8566	0.8566	0.1434	0.7019	0.8505	0.8032	0.1968	0.8298	0.8032	0.8101	0.8101	0.1899	0.6132	0.8064
DecisionStump	ReliefF	50	trees	0.8226	0.1774	0.8262	0.8226	0.8037	0.8037	0.1963	0.626	0.8108	0.7872	0.2128	0.7872	0.7872	0.7651	0.7651	0.235	0.5518	0.7715
RandomForest	ReliefF	50	trees	0.8293	0.1707	0.8513	0.8293	0.8339	0.8339	0.1661	0.6632	0.8315	0.8192	0.1809	0.8298	0.8192	0.8072	0.8072	0.1928	0.6262	0.8124
NBTree	ReliefF	50	trees	0.789	0.211	0.819	0.789	0.7983	0.7983	0.2017	0.5872	0.7932	0.7128	0.2873	0.7376	0.7128	0.7066	0.7066	0.2934	0.4193	0.7093
LMT	ReliefF	50	trees	0.8401	0.1599	0.8692	0.8401	0.8603	0.8603	0.1397	0.7001	0.8488	0.8138	0.1862	0.8511	0.8138	0.8432	0.8432	0.1568	0.6564	0.8255
LADTree	ReliefF	50	trees	0.7944	0.2056	0.8226	0.7944	0.802	0.802	0.198	0.5963	0.7979	0.8192	0.1809	0.8298	0.8192	0.8072	0.8072	0.1928	0.6262	0.8124
REPTree	ReliefF	50	trees	0.8132	0.1868	0.828	0.8132	0.8054	0.8054	0.1946	0.6185	0.809	0.8085	0.1915	0.8298	0.8085	0.8085	0.8085	0.1915	0.617	0.8085
RandomTree	ReliefF	50	trees	0.7298	0.2702	0.7706	0.7298	0.7427	0.7427	0.2573	0.4724	0.7352	0.6862	0.3138	0.7234	0.6862	0.6883	0.6883	0.3117	0.3744	0.6871
Decorate	SymmerU	30	meta	0.8669	0.1331	0.8907	0.8669	0.8837	0.8837	0.1163	0.7504	0.8744	0.7873	0.2128	0.8014	0.7873	0.7765	0.7765	0.2235	0.5636	0.7811
Logistic	GainRatio	100*	functions	0.7782	0.2218	0.8011	0.7782	0.776	0.776	0.224	0.5543	0.7771	0.7713	0.2287	0.8085	0.7713	0.7883	0.7883	0.2118	0.5593	0.7784
FT	GainRatio	50	trees	0.7903	0.2097	0.8208	0.7903	0.8006	0.8006	0.1994	0.5909	0.795	0.766	0.234	0.7943	0.766	0.7689	0.7689	0.2311	0.5348	0.7674
DecisionStump	GainRatio	50	trees	0.8226	0.1774	0.8262	0.8226	0.8037	0.8037	0.1963	0.626	0.8108	0.7872	0.2128	0.7872	0.7872	0.7651	0.7651	0.235	0.5518	0.7715
J48graft	GainRatio	50	trees	0.832	0.168	0.8584	0.832	0.8449	0.8449	0.1551	0.6768	0.8378	0.8298	0.1702	0.8511	0.8298	0.8334	0.8334	0.1666	0.6632	0.8316
J48	GainRatio	50	trees	0.8118	0.1882	0.8423	0.8118	0.8271	0.8271	0.1729	0.6388	0.8185	0.8298	0.1702	0.8511	0.8298	0.8334	0.8334	0.1666	0.6632	0.8316
LMT	GainRatio	50	trees	0.828	0.172	0.8656	0.828	0.8633	0.8633	0.1367	0.6903	0.8416	0.7926	0.2075	0.844	0.7926	0.8484	0.8484	0.1517	0.6385	0.8109
LADTree	GainRatio	50	trees	0.8575	0.1425	0.8763	0.8575	0.8625	0.8625	0.1375	0.72	0.8599	0.8032	0.1968	0.8227	0.8032	0.8001	0.8001	0.1999	0.6033	0.8016
Decorate	SymmerU	50	meta	0.8696	0.1304	0.8978	0.8696	0.8972	0.8972	0.1028	0.7663	0.8812	0.8245	0.1755	0.844	0.8245	0.8245	0.8245	0.1755	0.6489	0.8245
NBTree	GainRatio	50	trees	0.8253	0.1747	0.8477	0.8253	0.8298	0.8298	0.1702	0.6551	0.8275	0.8511	0.149	0.8723	0.8511	0.859	0.859	0.141	0.71	0.8548
REPTree	GainRatio	50	trees	0.8078	0.1922	0.8369	0.8078	0.8198	0.8198	0.1802	0.6274	0.8132	0.8245	0.1756	0.8582	0.8245	0.8497	0.8497	0.1503	0.6736	0.8348
RandomTree	GainRatio	50	trees	0.7997	0.2003	0.8262	0.7997	0.8057	0.8057	0.1943	0.6054	0.8025	0.7341	0.266	0.7518	0.7341	0.7234	0.7234	0.2766	0.4573	0.7276

## Sheet: KIRC-mRNA
#'_cv' means cross validation and '_ind' means independent test
name	VarSeleClass	NumOfVar	ModelingClass	TPR_cv	FPR_cv	ACC_cv	SPC_cv	PPV_cv	NPV_cv	FDR_cv	MCC_cv	F1_cv	TPR_ind	FPR_ind	ACC_ind	SPC_ind	PPV_ind	NPV_ind	FDR_ind	MCC_ind	F1_ind
ComplementNaiveBayes	OneR	50	bayes	0.7517	0.2483	0.75	0.7517	0.7286	0.7286	0.2714	0.4798	0.7333	0.5105	0.4895	0.4828	0.5105	0.5098	0.5098	0.4902	0.0203	0.4803
BFTree	SymmerU	100*	trees	0.6834	0.3166	0.7411	0.6834	0.7069	0.7069	0.2931	0.3896	0.6912	0.7448	0.2552	0.7586	0.7448	0.7349	0.7349	0.2652	0.4795	0.7388
ADTree	SymmerU	100*	trees	0.7105	0.2895	0.7589	0.7105	0.7281	0.7281	0.2719	0.4382	0.7173	0.7474	0.2527	0.7931	0.7474	0.7797	0.7797	0.2203	0.5261	0.7584
PART	SymmerU	100*	rules	0.7105	0.2895	0.7589	0.7105	0.7281	0.7281	0.2719	0.4382	0.7173	0.7184	0.2816	0.7241	0.7184	0.7034	0.7034	0.2966	0.4216	0.7071
OneR	SymmerU	100*	rules	0.509	0.491	0.5625	0.509	0.5089	0.5089	0.4911	0.0179	0.5089	0.6447	0.3553	0.6897	0.6447	0.6528	0.6528	0.3472	0.2974	0.6478
ZeroR	SymmerU	100*	rules	0.5	0.5	0.6696	0.5	-0.1652	-0.1652	0.6652	-1	0.4011	0.5	0.5	0.6552	0.5	0.3276	0.3276	0.6724	-1	0.3959
Ridor	SymmerU	100*	rules	0.6569	0.3431	0.6964	0.6569	0.6569	0.6569	0.3431	0.3139	0.6569	0.6684	0.3316	0.6897	0.6684	0.6617	0.6617	0.3384	0.33	0.6641
DecisionTable	SymmerU	100*	rules	0.6899	0.3101	0.7589	0.6899	0.7357	0.7357	0.2643	0.4231	0.7019	0.6974	0.3026	0.7586	0.6974	0.7435	0.7435	0.2565	0.4385	0.7088
ConjunctiveRule	SymmerU	100*	rules	0.636	0.364	0.7143	0.636	0.6736	0.6736	0.3264	0.3073	0.6432	0.5	0.5	0.6552	0.5	0.3276	0.3276	0.6724	-1	0.3959
NNge	SymmerU	100*	rules	0.8932	0.1068	0.8661	0.8932	0.8519	0.8519	0.1481	0.7439	0.859	0.6869	0.3132	0.6207	0.6869	0.6869	0.6869	0.3132	0.3737	0.6207
DTNB	SymmerU	100*	rules	0.7375	0.2625	0.7768	0.7375	0.7485	0.7485	0.2515	0.4858	0.7422	0.7711	0.229	0.7931	0.7711	0.7711	0.7711	0.229	0.5421	0.7711
FilteredClassifier	OneR	30	meta	0.7447	0.2553	0.7589	0.7447	0.731	0.731	0.269	0.4754	0.736	0.7448	0.2552	0.7586	0.7448	0.7349	0.7349	0.2652	0.4795	0.7388
LogitBoost	OneR	30	meta	0.8049	0.1951	0.8304	0.8049	0.8092	0.8092	0.1908	0.6141	0.8069	0.7237	0.2763	0.7931	0.7237	0.8079	0.8079	0.1921	0.5249	0.7411
MultiBoostAB	OneR	30	meta	0.7706	0.2294	0.8304	0.7706	0.8359	0.8359	0.1641	0.603	0.7902	0.7974	0.2027	0.8276	0.7974	0.8139	0.8139	0.1861	0.611	0.8043
MultiClassClassifier	OneR	30	meta	0.6299	0.3701	0.6786	0.6299	0.6338	0.6338	0.3662	0.2636	0.6316	0.6737	0.3263	0.7586	0.6737	0.775	0.775	0.225	0.4371	0.6853
Bagging	OneR	30	meta	0.8043	0.1957	0.8571	0.8043	0.868	0.868	0.132	0.6693	0.825	0.7448	0.2552	0.7586	0.7448	0.7349	0.7349	0.2652	0.4795	0.7388
Dagging	OneR	30	meta	0.7506	0.2494	0.8036	0.7506	0.7889	0.7889	0.2111	0.5382	0.7637	0.7211	0.279	0.7586	0.7211	0.7333	0.7333	0.2667	0.4542	0.7261
Decorate	OneR	30	meta	0.7305	0.2695	0.7857	0.7305	0.7657	0.7657	0.2343	0.4949	0.7422	0.7711	0.229	0.7931	0.7711	0.7711	0.7711	0.229	0.5421	0.7711
END	OneR	30	meta	0.7178	0.2822	0.7321	0.7178	0.7037	0.7037	0.2963	0.4213	0.7083	0.6447	0.3553	0.6897	0.6447	0.6528	0.6528	0.3472	0.2974	0.6478
MultiBoostAB	InfoGain	30	meta	0.7849	0.2151	0.8036	0.7849	0.7777	0.7777	0.2223	0.5625	0.7809	0.7448	0.2552	0.7586	0.7448	0.7349	0.7349	0.2652	0.4795	0.7388
MultiClassClassifier	InfoGain	30	meta	0.778	0.222	0.8036	0.778	0.778	0.778	0.222	0.556	0.778	0.7974	0.2027	0.8276	0.7974	0.8139	0.8139	0.1861	0.611	0.8043
FilteredClassifier	InfoGain	30	meta	0.8389	0.1611	0.8393	0.8389	0.817	0.817	0.183	0.6555	0.825	0.7448	0.2552	0.7586	0.7448	0.7349	0.7349	0.2652	0.4795	0.7388
LogitBoost	InfoGain	30	meta	0.771	0.229	0.8125	0.771	0.7938	0.7938	0.2063	0.5643	0.7801	0.7421	0.2579	0.7241	0.7421	0.7191	0.7191	0.281	0.4606	0.7157
HyperPipes	OneR	30	misc	0.7187	0.2813	0.6875	0.7187	0.6938	0.6938	0.3062	0.4118	0.6801	0.6079	0.3921	0.5172	0.6079	0.6331	0.6331	0.3669	0.2397	0.512
END	InfoGain	30	meta	0.8186	0.1814	0.8304	0.8186	0.8069	0.8069	0.1931	0.6254	0.812	0.8184	0.1816	0.7931	0.8184	0.7881	0.7881	0.2119	0.6058	0.7868
Bagging	InfoGain	30	meta	0.7777	0.2223	0.8214	0.7777	0.8068	0.8068	0.1932	0.5838	0.7888	0.7974	0.2027	0.8276	0.7974	0.8139	0.8139	0.1861	0.611	0.8043
Dagging	InfoGain	30	meta	0.8519	0.1481	0.875	0.8519	0.8623	0.8623	0.1377	0.7142	0.8567	0.7948	0.2053	0.7931	0.7948	0.7746	0.7746	0.2255	0.5689	0.7803
IB1	GainRatio	10	lazy	0.7568	0.2432	0.8393	0.7568	0.9032	0.9032	0.0968	0.6435	0.7857	0.5395	0.4606	0.5517	0.5395	0.5361	0.5361	0.464	0.0755	0.5317
RBFNetwork	OneR	30	functions	0.7852	0.2148	0.7857	0.7852	0.7625	0.7625	0.2375	0.5473	0.7692	0.7948	0.2053	0.7931	0.7948	0.7746	0.7746	0.2255	0.5689	0.7803
PART	ReliefF	50	rules	0.8319	0.1681	0.8482	0.8319	0.8275	0.8275	0.1725	0.6594	0.8296	0.5421	0.4579	0.5862	0.5421	0.5421	0.5421	0.4579	0.0842	0.5421
ADTree	ReliefF	10	trees	0.6773	0.3227	0.7054	0.6773	0.6708	0.6708	0.3292	0.3481	0.6735	0.4895	0.5105	0.5172	0.4895	0.4902	0.4902	0.5098	-0.0203	0.4873
IBk	GainRatio	10	lazy	0.7568	0.2432	0.8393	0.7568	0.9032	0.9032	0.0968	0.6435	0.7857	0.5395	0.4606	0.5517	0.5395	0.5361	0.5361	0.464	0.0755	0.5317
KStar	SymmerU	10	lazy	0.696	0.304	0.7946	0.696	0.8542	0.8542	0.1458	0.527	0.7158	0.5211	0.479	0.6207	0.5211	0.5334	0.5334	0.4667	0.053	0.5055
NNge	ReliefF	50	rules	0.753	0.247	0.6875	0.753	0.7346	0.7346	0.2654	0.4873	0.6863	0.5579	0.4421	0.4828	0.5579	0.5655	0.5655	0.4345	0.1231	0.4803
BayesNet	GainRatio	50	bayes	0.8515	0.1485	0.8929	0.8515	0.9053	0.9053	0.0947	0.7549	0.8711	0.8211	0.179	0.8276	0.8211	0.8081	0.8081	0.1919	0.629	0.8134
MultilayerPerceptron	GainRatio	10	functions	0.8317	0.1683	0.8571	0.8317	0.8416	0.8416	0.1584	0.6732	0.8363	0.5684	0.4316	0.6207	0.5684	0.5722	0.5722	0.4278	0.1406	0.5695
LWL	InfoGain	30	lazy	0.6578	0.3422	0.6518	0.6578	0.6404	0.6404	0.3596	0.2977	0.6365	0.6184	0.3816	0.6552	0.6184	0.6184	0.6184	0.3816	0.2368	0.6184
DecisionTable	ReliefF	50	rules	0.6632	0.3368	0.7232	0.6632	0.6841	0.6841	0.3159	0.3468	0.6699	0.5684	0.4316	0.6207	0.5684	0.5722	0.5722	0.4278	0.1406	0.5695
VFI	OneR	50	misc	0.6778	0.3222	0.6786	0.6778	0.6599	0.6599	0.3401	0.3372	0.6603	0.8184	0.1816	0.7931	0.8184	0.7881	0.7881	0.2119	0.6058	0.7868
HyperPipes	OneR	50	misc	0.7452	0.2548	0.7321	0.7452	0.7187	0.7187	0.2813	0.4632	0.7193	0.6079	0.3921	0.5172	0.6079	0.6331	0.6331	0.3669	0.2397	0.512
MultiClassClassifier	OneR	50	meta	0.6908	0.3092	0.7143	0.6908	0.6819	0.6819	0.3181	0.3726	0.6853	0.6421	0.3579	0.6552	0.6421	0.6324	0.6324	0.3677	0.2743	0.6339
MultiBoostAB	OneR	50	meta	0.7369	0.2631	0.8036	0.7369	0.8023	0.8023	0.1977	0.5353	0.7547	0.7974	0.2027	0.8276	0.7974	0.8139	0.8139	0.1861	0.611	0.8043
LogitBoost	OneR	50	meta	0.8117	0.1883	0.8304	0.8117	0.8076	0.8076	0.1924	0.6193	0.8096	0.7211	0.279	0.7586	0.7211	0.7333	0.7333	0.2667	0.4542	0.7261
FilteredClassifier	OneR	50	meta	0.7515	0.2485	0.7589	0.7515	0.7333	0.7333	0.2667	0.4845	0.7389	0.7448	0.2552	0.7586	0.7448	0.7349	0.7349	0.2652	0.4795	0.7388
END	OneR	50	meta	0.6977	0.3023	0.7143	0.6977	0.6849	0.6849	0.3151	0.3823	0.6889	0.7448	0.2552	0.7586	0.7448	0.7349	0.7349	0.2652	0.4795	0.7388
Decorate	OneR	50	meta	0.8045	0.1955	0.8482	0.8045	0.8435	0.8435	0.1565	0.6468	0.819	0.7474	0.2527	0.7931	0.7474	0.7797	0.7797	0.2203	0.5261	0.7584
Dagging	OneR	50	meta	0.8114	0.1886	0.8482	0.8114	0.8375	0.8375	0.1625	0.6483	0.822	0.7684	0.2316	0.7586	0.7684	0.7452	0.7452	0.2548	0.5131	0.7479
Bagging	OneR	50	meta	0.7436	0.2564	0.8125	0.7436	0.8201	0.8201	0.1799	0.5585	0.7635	0.7211	0.279	0.7586	0.7211	0.7333	0.7333	0.2667	0.4542	0.7261
NaiveBayesMultinomial	SymmerU	10	bayes	0.7247	0.2753	0.7321	0.7247	0.7068	0.7068	0.2932	0.4311	0.7114	0.6395	0.3606	0.6207	0.6395	0.6262	0.6262	0.3738	0.2653	0.6134
NaiveBayes	OneR	50	bayes	0.8117	0.1883	0.8304	0.8117	0.8076	0.8076	0.1924	0.6193	0.8096	0.7948	0.2053	0.7931	0.7948	0.7746	0.7746	0.2255	0.5689	0.7803
ComplementNaiveBayes	SymmerU	10	bayes	0.7184	0.2816	0.7054	0.7184	0.6942	0.6942	0.3058	0.4119	0.6924	0.5606	0.4395	0.5172	0.5606	0.5581	0.5581	0.4419	0.1186	0.5167
DMNBtext	SymmerU	10	bayes	0.6016	0.3984	0.7232	0.6016	0.735	0.735	0.265	0.3091	0.5951	0.7	0.3	0.7931	0.7	0.88	0.88	0.12	0.5514	0.7175
BayesianLogisticRegression	SymmerU	10	bayes	0.7521	0.2479	0.7321	0.7521	0.7237	0.7237	0.2763	0.4749	0.7214	0.5606	0.4395	0.5172	0.5606	0.5581	0.5581	0.4419	0.1186	0.5167
BayesNet	SymmerU	10	bayes	0.8386	0.1614	0.8571	0.8386	0.8386	0.8386	0.1614	0.6771	0.8386	0.7184	0.2816	0.7241	0.7184	0.7034	0.7034	0.2966	0.4216	0.7071
NaiveBayes	SymmerU	10	bayes	0.8517	0.1483	0.8839	0.8517	0.8813	0.8813	0.1188	0.7324	0.8639	0.7211	0.279	0.7586	0.7211	0.7333	0.7333	0.2667	0.4542	0.7261
PART	SymmerU	50	rules	0.7243	0.2757	0.75	0.7243	0.7187	0.7187	0.2813	0.4429	0.7212	0.7421	0.2579	0.7241	0.7421	0.7191	0.7191	0.281	0.4606	0.7157
RandomForest	ReliefF	100*	trees	0.7508	0.2492	0.7946	0.7508	0.7719	0.7719	0.2281	0.5223	0.7591	0.6684	0.3316	0.6897	0.6684	0.6617	0.6617	0.3384	0.33	0.6641
NBTree	ReliefF	100*	trees	0.7845	0.2155	0.8214	0.7845	0.8028	0.8028	0.1972	0.5871	0.7922	0.6948	0.3053	0.7241	0.6948	0.6948	0.6948	0.3053	0.3895	0.6948
LMT	ReliefF	100*	trees	0.818	0.182	0.8571	0.818	0.8515	0.8515	0.1485	0.6686	0.8311	0.8237	0.1763	0.8621	0.8237	0.8661	0.8661	0.134	0.6885	0.8389
LADTree	ReliefF	100*	trees	0.778	0.222	0.8036	0.778	0.778	0.778	0.222	0.556	0.778	0.7448	0.2552	0.7586	0.7448	0.7349	0.7349	0.2652	0.4795	0.7388
J48graft	ReliefF	100*	trees	0.6831	0.3169	0.7589	0.6831	0.7405	0.7405	0.2595	0.4197	0.6959	0.6184	0.3816	0.6552	0.6184	0.6184	0.6184	0.3816	0.2368	0.6184
J48	ReliefF	100*	trees	0.7038	0.2962	0.75	0.7038	0.7169	0.7169	0.2831	0.4205	0.7091	0.5921	0.4079	0.6207	0.5921	0.5883	0.5883	0.4117	0.1805	0.5895
DecisionStump	ReliefF	100*	trees	0.7178	0.2822	0.7321	0.7178	0.7037	0.7037	0.2963	0.4213	0.7083	0.6974	0.3026	0.7586	0.6974	0.7435	0.7435	0.2565	0.4385	0.7088
SimpleLogistic	SymmerU	100*	functions	0.8182	0.1818	0.8482	0.8182	0.833	0.833	0.167	0.651	0.8247	0.671	0.329	0.7241	0.671	0.6935	0.6935	0.3066	0.3638	0.6778
FT	ReliefF	30	trees	0.8856	0.1144	0.9018	0.8856	0.8911	0.8911	0.1089	0.7766	0.8882	0.5948	0.4053	0.6552	0.5948	0.6072	0.6072	0.3929	0.2015	0.5972
IBk	GainRatio	100*	lazy	0.6351	0.3649	0.7589	0.6351	0.8676	0.8676	0.1324	0.4458	0.6365	0.6737	0.3263	0.7586	0.6737	0.775	0.775	0.225	0.4371	0.6853
BayesNet	OneR	50	bayes	0.7984	0.2016	0.8125	0.7984	0.7875	0.7875	0.2125	0.5858	0.7922	0.7948	0.2053	0.7931	0.7948	0.7746	0.7746	0.2255	0.5689	0.7803
LibSVM	InfoGain	10	functions	0.5339	0.4661	0.6875	0.5339	0.7176	0.7176	0.2824	0.1717	0.4775	0.5237	0.4763	0.6552	0.5237	0.5834	0.5834	0.4167	0.0889	0.4747
NaiveBayes	ReliefF	50	bayes	0.8726	0.1274	0.8661	0.8726	0.8456	0.8456	0.1544	0.7177	0.855	0.5395	0.4606	0.5517	0.5395	0.5361	0.5361	0.464	0.0755	0.5317
ComplementNaiveBayes	InfoGain	10	bayes	0.711	0.289	0.7321	0.711	0.7011	0.7011	0.2989	0.412	0.705	0.6632	0.3369	0.6207	0.6632	0.652	0.652	0.348	0.3149	0.6189
DMNBtext	SymmerU	30	bayes	0.6692	0.3308	0.7679	0.6692	0.7907	0.7907	0.2093	0.4436	0.6828	0.6737	0.3263	0.7586	0.6737	0.775	0.775	0.225	0.4371	0.6853
NaiveBayesMultinomial	InfoGain	10	bayes	0.7106	0.2894	0.75	0.7106	0.7169	0.7169	0.2831	0.4275	0.7135	0.7158	0.2842	0.6897	0.7158	0.6952	0.6952	0.3048	0.4105	0.6837
NaiveBayesMultinomialUpdateable	InfoGain	10	bayes	0.6422	0.3578	0.75	0.6422	0.7711	0.7711	0.2289	0.3927	0.6494	0.6974	0.3026	0.7586	0.6974	0.7435	0.7435	0.2565	0.4385	0.7088
NaiveBayes	InfoGain	10	bayes	0.7841	0.2159	0.8393	0.7841	0.8436	0.8436	0.1564	0.6249	0.8031	0.6974	0.3026	0.7586	0.6974	0.7435	0.7435	0.2565	0.4385	0.7088
Logistic	InfoGain	10	functions	0.8115	0.1885	0.8393	0.8115	0.8208	0.8208	0.1792	0.6322	0.8158	0.8974	0.1027	0.8966	0.8974	0.8813	0.8813	0.1187	0.7785	0.888
BayesianLogisticRegression	InfoGain	10	bayes	0.5067	0.4933	0.3393	0.5067	0.6667	0.6667	0.3333	0.0667	0.2632	0.5	0.5	0.3448	0.5	0.1724	0.1724	0.8276	-1	0.2564
BayesNet	InfoGain	10	bayes	0.8656	0.1344	0.875	0.8656	0.8563	0.8563	0.1437	0.7219	0.8606	0.8184	0.1816	0.7931	0.8184	0.7881	0.7881	0.2119	0.6058	0.7868
RBFNetwork	SymmerU	10	functions	0.8114	0.1886	0.8482	0.8114	0.8375	0.8375	0.1625	0.6483	0.822	0.7211	0.279	0.7586	0.7211	0.7333	0.7333	0.2667	0.4542	0.7261
J48	ReliefF	30	trees	0.8252	0.1748	0.8393	0.8252	0.817	0.817	0.183	0.6422	0.8208	0.5684	0.4316	0.6207	0.5684	0.5722	0.5722	0.4278	0.1406	0.5695
NaiveBayesMultinomial	OneR	50	bayes	0.7517	0.2483	0.75	0.7517	0.7286	0.7286	0.2714	0.4798	0.7333	0.5105	0.4895	0.4828	0.5105	0.5098	0.5098	0.4902	0.0203	0.4803
LMT	ReliefF	30	trees	0.8315	0.1685	0.8661	0.8315	0.8594	0.8594	0.1406	0.6903	0.8429	0.6948	0.3053	0.7241	0.6948	0.6948	0.6948	0.3053	0.3895	0.6948
RandomForest	ReliefF	30	trees	0.7506	0.2494	0.8036	0.7506	0.7889	0.7889	0.2111	0.5382	0.7637	0.8211	0.179	0.8276	0.8211	0.8081	0.8081	0.1919	0.629	0.8134
NNge	SymmerU	50	rules	0.8528	0.1472	0.8304	0.8528	0.8158	0.8158	0.1842	0.6676	0.8215	0.6869	0.3132	0.6207	0.6869	0.6869	0.6869	0.3132	0.3737	0.6207
NaiveBayes	ReliefF	10	bayes	0.7578	0.2422	0.7857	0.7578	0.7578	0.7578	0.2422	0.5157	0.7578	0.6184	0.3816	0.6552	0.6184	0.6184	0.6184	0.3816	0.2368	0.6184
ComplementNaiveBayes	ReliefF	50	bayes	0.6438	0.3562	0.6696	0.6438	0.6357	0.6357	0.3643	0.2794	0.6382	0.5369	0.4632	0.5172	0.5369	0.5337	0.5337	0.4664	0.0704	0.512
RandomForest	InfoGain	50	trees	0.8387	0.1613	0.8482	0.8387	0.8264	0.8264	0.1736	0.665	0.8318	0.8211	0.179	0.8276	0.8211	0.8081	0.8081	0.1919	0.629	0.8134
NBTree	InfoGain	50	trees	0.7038	0.2962	0.75	0.7038	0.7169	0.7169	0.2831	0.4205	0.7091	0.7711	0.229	0.7931	0.7711	0.7711	0.7711	0.229	0.5421	0.7711
LMT	InfoGain	50	trees	0.778	0.222	0.8036	0.778	0.778	0.778	0.222	0.556	0.778	0.7974	0.2027	0.8276	0.7974	0.8139	0.8139	0.1861	0.611	0.8043
VotedPerceptron	OneR	100*	functions	0.6429	0.3571	0.7143	0.6429	0.6728	0.6728	0.3272	0.3142	0.65	0.5474	0.4527	0.6552	0.5474	0.59	0.59	0.41	0.1306	0.5292
SPegasos	OneR	100*	functions	0.5	0.5	0.6696	0.5	-0.1652	-0.1652	0.6652	-1	0.4011	0.5	0.5	0.6552	0.5	0.3276	0.3276	0.6724	-1	0.3959
J48	InfoGain	50	trees	0.7312	0.2688	0.75	0.7312	0.7204	0.7204	0.2796	0.4514	0.7246	0.6658	0.3342	0.6552	0.6658	0.65	0.65	0.35	0.3154	0.6446
FT	InfoGain	50	trees	0.7917	0.2083	0.8036	0.7917	0.7781	0.7781	0.2219	0.5696	0.7836	0.7448	0.2552	0.7586	0.7448	0.7349	0.7349	0.2652	0.4795	0.7388
MultilayerPerceptron	OneR	100*	functions	0.8452	0.1548	0.8661	0.8452	0.8501	0.8501	0.1499	0.6954	0.8476	0.7184	0.2816	0.7241	0.7184	0.7034	0.7034	0.2966	0.4216	0.7071
VFI	InfoGain	30	misc	0.8117	0.1883	0.8304	0.8117	0.8076	0.8076	0.1924	0.6193	0.8096	0.7658	0.2342	0.7241	0.7658	0.7428	0.7428	0.2572	0.5081	0.7212
LogitBoost	GainRatio	100*	meta	0.7236	0.2764	0.7857	0.7236	0.7704	0.7704	0.2296	0.4918	0.7375	0.6948	0.3053	0.7241	0.6948	0.6948	0.6948	0.3053	0.3895	0.6948
REPTree	InfoGain	50	trees	0.7108	0.2892	0.7411	0.7108	0.708	0.708	0.292	0.4188	0.7094	0.5421	0.4579	0.5862	0.5421	0.5421	0.5421	0.4579	0.0842	0.5421
RandomTree	InfoGain	50	trees	0.6569	0.3431	0.6964	0.6569	0.6569	0.6569	0.3431	0.3139	0.6569	0.7158	0.2842	0.6897	0.7158	0.6952	0.6952	0.3048	0.4105	0.6837
REPTree	ReliefF	30	trees	0.5953	0.4047	0.6964	0.5953	0.6497	0.6497	0.3503	0.2389	0.5952	0.6184	0.3816	0.6552	0.6184	0.6184	0.6184	0.3816	0.2368	0.6184
LibSVM	ReliefF	10	functions	0.5416	0.4584	0.6429	0.5416	0.5604	0.5604	0.4396	0.1003	0.5347	0.4948	0.5053	0.5862	0.4948	0.4928	0.4928	0.5073	-0.0124	0.4822
IBk	OneR	50	lazy	0.7099	0.2901	0.7857	0.7099	0.7846	0.7846	0.2154	0.4888	0.7268	0.7474	0.2527	0.7931	0.7474	0.7797	0.7797	0.2203	0.5261	0.7584
J48graft	OneR	10	trees	0.6701	0.3299	0.7232	0.6701	0.6844	0.6844	0.3156	0.3542	0.6754	0.5474	0.4527	0.6552	0.5474	0.59	0.59	0.41	0.1306	0.5292
J48	OneR	10	trees	0.6501	0.3499	0.6964	0.6501	0.6545	0.6545	0.3455	0.3046	0.652	0.5474	0.4527	0.6552	0.5474	0.59	0.59	0.41	0.1306	0.5292
FT	OneR	10	trees	0.758	0.242	0.7768	0.758	0.7486	0.7486	0.2514	0.5065	0.7526	0.6921	0.3079	0.6897	0.6921	0.6755	0.6755	0.3245	0.3672	0.6758
DecisionStump	OneR	10	trees	0.7238	0.2762	0.7768	0.7238	0.7524	0.7524	0.2476	0.4754	0.7338	0.7474	0.2527	0.7931	0.7474	0.7797	0.7797	0.2203	0.5261	0.7584
RandomForest	OneR	10	trees	0.7375	0.2625	0.7768	0.7375	0.7485	0.7485	0.2515	0.4858	0.7422	0.6421	0.3579	0.6552	0.6421	0.6324	0.6324	0.3677	0.2743	0.6339
NBTree	OneR	10	trees	0.7243	0.2757	0.75	0.7243	0.7187	0.7187	0.2813	0.4429	0.7212	0.7974	0.2027	0.8276	0.7974	0.8139	0.8139	0.1861	0.611	0.8043
LMT	OneR	10	trees	0.724	0.276	0.7679	0.724	0.7384	0.7384	0.2616	0.4621	0.7299	0.671	0.329	0.7241	0.671	0.6935	0.6935	0.3066	0.3638	0.6778
LADTree	OneR	10	trees	0.7777	0.2223	0.8214	0.7777	0.8068	0.8068	0.1932	0.5838	0.7888	0.7211	0.279	0.7586	0.7211	0.7333	0.7333	0.2667	0.4542	0.7261
Decorate	InfoGain	30	meta	0.8314	0.1686	0.875	0.8314	0.882	0.882	0.118	0.7116	0.8496	0.7711	0.229	0.7931	0.7711	0.7711	0.7711	0.229	0.5421	0.7711
REPTree	OneR	10	trees	0.6768	0.3232	0.7321	0.6768	0.6953	0.6953	0.3047	0.3716	0.6833	0.7474	0.2527	0.7931	0.7474	0.7797	0.7797	0.2203	0.5261	0.7584
RandomTree	OneR	10	trees	0.6501	0.3499	0.6964	0.6501	0.6545	0.6545	0.3455	0.3046	0.652	0.7211	0.279	0.7586	0.7211	0.7333	0.7333	0.2667	0.4542	0.7261
SPegasos	SymmerU	10	functions	0.4933	0.5067	0.6607	0.4933	0.3333	0.3333	0.6667	-0.0667	0.3978	0.5	0.5	0.6552	0.5	0.3276	0.3276	0.6724	-1	0.3959
VFI	OneR	30	misc	0.6843	0.3157	0.6964	0.6843	0.6697	0.6697	0.3303	0.3537	0.673	0.7921	0.2079	0.7586	0.7921	0.7643	0.7643	0.2357	0.5557	0.754
IBk	InfoGain	10	lazy	0.7845	0.2155	0.8214	0.7845	0.8028	0.8028	0.1972	0.5871	0.7922	0.7184	0.2816	0.7241	0.7184	0.7034	0.7034	0.2966	0.4216	0.7071
KStar	InfoGain	10	lazy	0.7034	0.2966	0.7679	0.7034	0.746	0.746	0.254	0.4474	0.7156	0.5948	0.4053	0.6552	0.5948	0.6072	0.6072	0.3929	0.2015	0.5972
VotedPerceptron	InfoGain	10	functions	0.5611	0.4389	0.6964	0.5611	0.6828	0.6828	0.3172	0.2114	0.5349	0.5921	0.4079	0.6207	0.5921	0.5883	0.5883	0.4117	0.1805	0.5895
IB1	InfoGain	10	lazy	0.7845	0.2155	0.8214	0.7845	0.8028	0.8028	0.1972	0.5871	0.7922	0.7184	0.2816	0.7241	0.7184	0.7034	0.7034	0.2966	0.4216	0.7071
SimpleLogistic	InfoGain	10	functions	0.7914	0.2086	0.8214	0.7914	0.8	0.8	0.2	0.5913	0.7953	0.7974	0.2027	0.8276	0.7974	0.8139	0.8139	0.1861	0.611	0.8043
SPegasos	InfoGain	10	functions	0.6018	0.3982	0.7143	0.6018	0.6942	0.6942	0.3058	0.2812	0.5993	0.5	0.5	0.6552	0.5	0.3276	0.3276	0.6724	-1	0.3959
MultilayerPerceptron	InfoGain	10	functions	0.7845	0.2155	0.8214	0.7845	0.8028	0.8028	0.1972	0.5871	0.7922	0.7948	0.2053	0.7931	0.7948	0.7746	0.7746	0.2255	0.5689	0.7803
RBFNetwork	InfoGain	10	functions	0.8117	0.1883	0.8304	0.8117	0.8076	0.8076	0.1924	0.6193	0.8096	0.7158	0.2842	0.6897	0.7158	0.6952	0.6952	0.3048	0.4105	0.6837
DMNBtext	ReliefF	10	bayes	0.622	0.378	0.7321	0.622	0.7326	0.7326	0.2674	0.3369	0.6243	0.4711	0.529	0.5862	0.4711	0.445	0.445	0.555	-0.0798	0.4351
LWL	InfoGain	10	lazy	0.6645	0.3355	0.6607	0.6645	0.6467	0.6467	0.3533	0.3107	0.6444	0.7211	0.279	0.7586	0.7211	0.7333	0.7333	0.2667	0.4542	0.7261
AdaBoostM1	InfoGain	10	meta	0.7371	0.2629	0.7946	0.7371	0.7798	0.7798	0.2202	0.5151	0.7507	0.7948	0.2053	0.7931	0.7948	0.7746	0.7746	0.2255	0.5689	0.7803
LibSVM	SymmerU	100*	functions	0.5	0.5	0.6696	0.5	-0.1652	-0.1652	0.6652	-1	0.4011	0.5	0.5	0.6552	0.5	0.3276	0.3276	0.6724	-1	0.3959
Decorate	GainRatio	30	meta	0.7973	0.2027	0.8661	0.7973	0.9167	0.9167	0.0833	0.7039	0.8274	0.5448	0.4553	0.6207	0.5448	0.5552	0.5552	0.4448	0.0994	0.5423
LogitBoost	GainRatio	30	meta	0.791	0.209	0.8393	0.791	0.8355	0.8355	0.1645	0.6249	0.8067	0.5658	0.4342	0.5862	0.5658	0.5613	0.5613	0.4387	0.127	0.5606
BayesianLogisticRegression	ReliefF	10	bayes	0.5	0.5	0.3304	0.5	-0.3348	-0.3348	0.8348	-1	0.2483	0.5	0.5	0.3448	0.5	0.1724	0.1724	0.8276	-1	0.2564
ZeroR	ReliefF	30	rules	0.5	0.5	0.6696	0.5	-0.1652	-0.1652	0.6652	-1	0.4011	0.5	0.5	0.6552	0.5	0.3276	0.3276	0.6724	-1	0.3959
VFI	GainRatio	100*	misc	0.8324	0.1676	0.8214	0.8324	0.802	0.802	0.198	0.6337	0.8095	0.6132	0.3869	0.5862	0.6132	0.6034	0.6034	0.3967	0.2163	0.5818
HyperPipes	GainRatio	100*	misc	0.8667	0.1333	0.8214	0.8667	0.8246	0.8246	0.1754	0.6899	0.8167	0.529	0.4711	0.4138	0.529	0.555	0.555	0.445	0.0798	0.3876
SimpleLogistic	OneR	100*	functions	0.8319	0.1681	0.8482	0.8319	0.8275	0.8275	0.1725	0.6594	0.8296	0.7711	0.229	0.7931	0.7711	0.7711	0.7711	0.229	0.5421	0.7711
LMT	InfoGain	10	trees	0.7914	0.2086	0.8214	0.7914	0.8	0.8	0.2	0.5913	0.7953	0.7974	0.2027	0.8276	0.7974	0.8139	0.8139	0.1861	0.611	0.8043
IB1	OneR	50	lazy	0.7099	0.2901	0.7857	0.7099	0.7846	0.7846	0.2154	0.4888	0.7268	0.7474	0.2527	0.7931	0.7474	0.7797	0.7797	0.2203	0.5261	0.7584
MultiBoostAB	GainRatio	10	meta	0.6085	0.3915	0.7232	0.6085	0.7194	0.7194	0.2806	0.3085	0.6065	0.5974	0.4026	0.6897	0.5974	0.6542	0.6542	0.3459	0.245	0.5954
ADTree	GainRatio	30	trees	0.7645	0.2355	0.7946	0.7645	0.7683	0.7683	0.2317	0.5328	0.7663	0.6395	0.3606	0.6207	0.6395	0.6262	0.6262	0.3738	0.2653	0.6134
BFTree	GainRatio	30	trees	0.7032	0.2968	0.7768	0.7032	0.767	0.767	0.233	0.4659	0.7184	0.6421	0.3579	0.6552	0.6421	0.6324	0.6324	0.3677	0.2743	0.6339
DTNB	GainRatio	30	rules	0.7977	0.2023	0.8482	0.7977	0.8512	0.8512	0.1488	0.6466	0.8158	0.6184	0.3816	0.6552	0.6184	0.6184	0.6184	0.3816	0.2368	0.6184
NNge	GainRatio	30	rules	0.9396	0.0604	0.9375	0.9396	0.9236	0.9236	0.0764	0.8631	0.9307	0.6369	0.3631	0.5862	0.6369	0.6313	0.6313	0.3687	0.2681	0.5857
ConjunctiveRule	GainRatio	30	rules	0.5679	0.4321	0.6964	0.5679	0.6697	0.6697	0.3303	0.2147	0.5492	0.6237	0.3763	0.7241	0.6237	0.735	0.735	0.265	0.341	0.6234
DecisionTable	GainRatio	30	rules	0.6832	0.3168	0.75	0.6832	0.7216	0.7216	0.2784	0.403	0.6938	0.6684	0.3316	0.6897	0.6684	0.6617	0.6617	0.3384	0.33	0.6641
Ridor	GainRatio	30	rules	0.6494	0.3506	0.7321	0.6494	0.7025	0.7025	0.2975	0.3478	0.6585	0.5948	0.4053	0.6552	0.5948	0.6072	0.6072	0.3929	0.2015	0.5972
ZeroR	GainRatio	30	rules	0.5	0.5	0.6696	0.5	-0.1652	-0.1652	0.6652	-1	0.4011	0.5	0.5	0.6552	0.5	0.3276	0.3276	0.6724	-1	0.3959
OneR	GainRatio	30	rules	0.5553	0.4447	0.6429	0.5553	0.5706	0.5706	0.4294	0.125	0.554	0.6737	0.3263	0.7586	0.6737	0.775	0.775	0.225	0.4371	0.6853
PART	GainRatio	30	rules	0.7645	0.2355	0.7946	0.7645	0.7683	0.7683	0.2317	0.5328	0.7663	0.7448	0.2552	0.7586	0.7448	0.7349	0.7349	0.2652	0.4795	0.7388
ADTree	GainRatio	100*	trees	0.6968	0.3032	0.7589	0.6968	0.7321	0.7321	0.2679	0.4274	0.7074	0.6948	0.3053	0.7241	0.6948	0.6948	0.6948	0.3053	0.3895	0.6948
BFTree	GainRatio	100*	trees	0.6764	0.3236	0.75	0.6764	0.7251	0.7251	0.2749	0.3985	0.6878	0.6921	0.3079	0.6897	0.6921	0.6755	0.6755	0.3245	0.3672	0.6758
ConjunctiveRule	GainRatio	100*	rules	0.5679	0.4321	0.6964	0.5679	0.6697	0.6697	0.3303	0.2147	0.5492	0.6237	0.3763	0.7241	0.6237	0.735	0.735	0.265	0.341	0.6234
DecisionTable	GainRatio	100*	rules	0.6697	0.3303	0.7411	0.6697	0.7106	0.7106	0.2894	0.3782	0.6798	0.6684	0.3316	0.6897	0.6684	0.6617	0.6617	0.3384	0.33	0.6641
DTNB	GainRatio	100*	rules	0.6423	0.3577	0.7411	0.6423	0.7335	0.7335	0.2665	0.3646	0.6506	0.5184	0.4816	0.5862	0.5184	0.5209	0.5209	0.4792	0.0392	0.5166
NNge	GainRatio	100*	rules	0.8398	0.1602	0.7946	0.8398	0.8011	0.8011	0.1989	0.6397	0.7898	0.6316	0.3684	0.5172	0.6316	0.7084	0.7084	0.2917	0.3311	0.5024
OneR	GainRatio	100*	rules	0.6227	0.3773	0.6964	0.6227	0.6484	0.6484	0.3516	0.2699	0.6281	0.6184	0.3816	0.6552	0.6184	0.6184	0.6184	0.3816	0.2368	0.6184
PART	GainRatio	100*	rules	0.7438	0.2562	0.8036	0.7438	0.7948	0.7948	0.2052	0.5361	0.7594	0.6684	0.3316	0.6897	0.6684	0.6617	0.6617	0.3384	0.33	0.6641
Ridor	GainRatio	100*	rules	0.6092	0.3908	0.6875	0.6092	0.6355	0.6355	0.3645	0.2433	0.6135	0.3894	0.6106	0.4483	0.3894	0.3894	0.3894	0.6106	-0.2211	0.3894
ZeroR	GainRatio	100*	rules	0.5	0.5	0.6696	0.5	-0.1652	-0.1652	0.6652	-1	0.4011	0.5	0.5	0.6552	0.5	0.3276	0.3276	0.6724	-1	0.3959
NBTree	OneR	30	trees	0.7105	0.2895	0.7589	0.7105	0.7281	0.7281	0.2719	0.4382	0.7173	0.6132	0.3869	0.5862	0.6132	0.6034	0.6034	0.3967	0.2163	0.5818
NBTree	GainRatio	100*	trees	0.8114	0.1886	0.8482	0.8114	0.8375	0.8375	0.1625	0.6483	0.822	0.5921	0.4079	0.6207	0.5921	0.5883	0.5883	0.4117	0.1805	0.5895
LibSVM	InfoGain	100*	functions	0.5	0.5	0.6696	0.5	-0.1652	-0.1652	0.6652	-1	0.4011	0.5	0.5	0.6552	0.5	0.3276	0.3276	0.6724	-1	0.3959
HyperPipes	GainRatio	10	misc	0.6532	0.3468	0.5446	0.6532	0.6901	0.6901	0.3099	0.3412	0.5402	0.579	0.4211	0.4483	0.579	0.6923	0.6923	0.3077	0.2464	0.4142
VFI	GainRatio	10	misc	0.9132	0.0868	0.8929	0.9132	0.8753	0.8753	0.1247	0.7875	0.8857	0.6369	0.3631	0.5862	0.6369	0.6313	0.6313	0.3687	0.2681	0.5857
RandomTree	ReliefF	50	trees	0.6568	0.3432	0.7054	0.6568	0.664	0.664	0.336	0.3207	0.6598	0.671	0.329	0.7241	0.671	0.6935	0.6935	0.3066	0.3638	0.6778
RandomTree	SymmerU	50	trees	0.7782	0.2218	0.7946	0.7782	0.7681	0.7681	0.2319	0.5462	0.7724	0.6948	0.3053	0.7241	0.6948	0.6948	0.6948	0.3053	0.3895	0.6948
FilteredClassifier	GainRatio	10	meta	0.8249	0.1751	0.8571	0.8249	0.8458	0.8458	0.1542	0.6703	0.8338	0.5132	0.4869	0.5172	0.5132	0.5119	0.5119	0.4881	0.025	0.5024
LogitBoost	GainRatio	10	meta	0.7845	0.2155	0.8214	0.7845	0.8028	0.8028	0.1972	0.5871	0.7922	0.5658	0.4342	0.5862	0.5658	0.5613	0.5613	0.4387	0.127	0.5606
LADTree	ReliefF	50	trees	0.7445	0.2555	0.7679	0.7445	0.7383	0.7383	0.2617	0.4828	0.7411	0.6211	0.379	0.6897	0.6211	0.6494	0.6494	0.3507	0.2689	0.6256
LMT	ReliefF	50	trees	0.7643	0.2357	0.8036	0.7643	0.7814	0.7814	0.2186	0.5454	0.7714	0.7211	0.279	0.7586	0.7211	0.7333	0.7333	0.2667	0.4542	0.7261
Bagging	GainRatio	10	meta	0.7369	0.2631	0.8036	0.7369	0.8023	0.8023	0.1977	0.5353	0.7547	0.4948	0.5053	0.5862	0.4948	0.4928	0.4928	0.5073	-0.0124	0.4822
J48graft	ReliefF	50	trees	0.7573	0.2427	0.8125	0.7573	0.8036	0.8036	0.1964	0.559	0.7724	0.6474	0.3527	0.7241	0.6474	0.7029	0.7029	0.2971	0.3458	0.6547
DecisionStump	ReliefF	50	trees	0.6568	0.3432	0.7054	0.6568	0.664	0.664	0.336	0.3207	0.6598	0.6237	0.3763	0.7241	0.6237	0.735	0.735	0.265	0.341	0.6234
END	GainRatio	10	meta	0.8321	0.1679	0.8393	0.8321	0.8166	0.8166	0.1834	0.6484	0.823	0.6447	0.3553	0.6897	0.6447	0.6528	0.6528	0.3472	0.2974	0.6478
PART	ReliefF	10	rules	0.7305	0.2695	0.7857	0.7305	0.7657	0.7657	0.2343	0.4949	0.7422	0.4895	0.5105	0.5172	0.4895	0.4902	0.4902	0.5098	-0.0203	0.4873
OneR	ReliefF	10	rules	0.5892	0.4108	0.6607	0.5892	0.6028	0.6028	0.3972	0.1915	0.5919	0.4921	0.5079	0.5517	0.4921	0.4917	0.4917	0.5084	-0.0162	0.4913
ZeroR	ReliefF	10	rules	0.5	0.5	0.6696	0.5	-0.1652	-0.1652	0.6652	-1	0.4011	0.5	0.5	0.6552	0.5	0.3276	0.3276	0.6724	-1	0.3959
Ridor	ReliefF	10	rules	0.6905	0.3095	0.7321	0.6905	0.6961	0.6961	0.3039	0.3865	0.693	0.5132	0.4869	0.5172	0.5132	0.5119	0.5119	0.4881	0.025	0.5024
AdaBoostM1	OneR	30	meta	0.7371	0.2629	0.7946	0.7371	0.7798	0.7798	0.2202	0.5151	0.7507	0.6974	0.3026	0.7586	0.6974	0.7435	0.7435	0.2565	0.4385	0.7088
LWL	OneR	30	lazy	0.6766	0.3234	0.7411	0.6766	0.7083	0.7083	0.2917	0.3836	0.6857	0.7711	0.229	0.7931	0.7711	0.7711	0.7711	0.229	0.5421	0.7711
NNge	ReliefF	10	rules	0.7178	0.2822	0.7321	0.7178	0.7037	0.7037	0.2963	0.4213	0.7083	0.5342	0.4658	0.4828	0.5342	0.5342	0.5342	0.4658	0.0684	0.4828
DTNB	ReliefF	10	rules	0.7036	0.2964	0.7589	0.7036	0.7297	0.7297	0.2703	0.4325	0.7125	0.4395	0.5606	0.4828	0.4395	0.4419	0.4419	0.5581	-0.1186	0.4402
IB1	OneR	30	lazy	0.7236	0.2764	0.7857	0.7236	0.7704	0.7704	0.2296	0.4918	0.7375	0.671	0.329	0.7241	0.671	0.6935	0.6935	0.3066	0.3638	0.6778
VotedPerceptron	OneR	30	functions	0.6695	0.3305	0.75	0.6695	0.7298	0.7298	0.2702	0.3948	0.6813	0.6211	0.379	0.6897	0.6211	0.6494	0.6494	0.3507	0.2689	0.6256
KStar	OneR	30	lazy	0.6827	0.3173	0.7768	0.6827	0.7996	0.7996	0.2004	0.468	0.6988	0.7	0.3	0.7931	0.7	0.88	0.88	0.12	0.5514	0.7175
IBk	OneR	30	lazy	0.7236	0.2764	0.7857	0.7236	0.7704	0.7704	0.2296	0.4918	0.7375	0.671	0.329	0.7241	0.671	0.6935	0.6935	0.3066	0.3638	0.6778
BFTree	ReliefF	10	trees	0.6701	0.3299	0.7232	0.6701	0.6844	0.6844	0.3156	0.3542	0.6754	0.5684	0.4316	0.6207	0.5684	0.5722	0.5722	0.4278	0.1406	0.5695
MultilayerPerceptron	OneR	30	functions	0.7177	0.2823	0.7411	0.7177	0.7097	0.7097	0.2903	0.4273	0.713	0.7737	0.2263	0.8276	0.7737	0.8377	0.8377	0.1624	0.608	0.7919
SPegasos	OneR	30	functions	0.5	0.5	0.6696	0.5	-0.1652	-0.1652	0.6652	-1	0.4011	0.5	0.5	0.6552	0.5	0.3276	0.3276	0.6724	-1	0.3959
SimpleLogistic	OneR	30	functions	0.7647	0.2353	0.7857	0.7647	0.758	0.758	0.242	0.5226	0.761	0.8974	0.1027	0.8966	0.8974	0.8813	0.8813	0.1187	0.7785	0.888
NaiveBayes	GainRatio	100*	bayes	0.9398	0.0602	0.9286	0.9398	0.9114	0.9114	0.0886	0.8507	0.9222	0.7921	0.2079	0.7586	0.7921	0.7643	0.7643	0.2357	0.5557	0.754
Logistic	GainRatio	100*	functions	0.7301	0.2699	0.8036	0.7301	0.8119	0.8119	0.1881	0.5358	0.7496	0.6447	0.3553	0.6897	0.6447	0.6528	0.6528	0.3472	0.2974	0.6478
BayesianLogisticRegression	GainRatio	100*	bayes	0.6319	0.3681	0.5804	0.6319	0.6223	0.6223	0.3777	0.254	0.5787	0.529	0.4711	0.4138	0.529	0.555	0.555	0.445	0.0798	0.3876
BayesNet	GainRatio	100*	bayes	0.8515	0.1485	0.8929	0.8515	0.9053	0.9053	0.0947	0.7549	0.8711	0.7974	0.2027	0.8276	0.7974	0.8139	0.8139	0.1861	0.611	0.8043
ComplementNaiveBayes	GainRatio	100*	bayes	0.751	0.249	0.7857	0.751	0.7584	0.7584	0.2416	0.5094	0.7544	0.6921	0.3079	0.6897	0.6921	0.6755	0.6755	0.3245	0.3672	0.6758
DMNBtext	GainRatio	100*	bayes	0.6486	0.3514	0.7679	0.6486	0.8713	0.8713	0.1287	0.4699	0.6553	0.5737	0.4263	0.6897	0.5737	0.6795	0.6795	0.3205	0.23	0.5538
NaiveBayesMultinomial	GainRatio	100*	bayes	0.7375	0.2625	0.7768	0.7375	0.7485	0.7485	0.2515	0.4858	0.7422	0.7184	0.2816	0.7241	0.7184	0.7034	0.7034	0.2966	0.4216	0.7071
NaiveBayesMultinomialUpdateable	GainRatio	100*	bayes	0.7506	0.2494	0.8036	0.7506	0.7889	0.7889	0.2111	0.5382	0.7637	0.7448	0.2552	0.7586	0.7448	0.7349	0.7349	0.2652	0.4795	0.7388
LibSVM	GainRatio	100*	functions	0.5	0.5	0.6696	0.5	-0.1652	-0.1652	0.6652	-1	0.4011	0.5	0.5	0.6552	0.5	0.3276	0.3276	0.6724	-1	0.3959
LADTree	OneR	50	trees	0.7378	0.2622	0.7589	0.7378	0.7292	0.7292	0.2708	0.4669	0.7328	0.671	0.329	0.7241	0.671	0.6935	0.6935	0.3066	0.3638	0.6778
IBk	SymmerU	30	lazy	0.7977	0.2023	0.8482	0.7977	0.8512	0.8512	0.1488	0.6466	0.8158	0.7211	0.279	0.7586	0.7211	0.7333	0.7333	0.2667	0.4542	0.7261
NaiveBayes	InfoGain	100*	bayes	0.8254	0.1746	0.8304	0.8254	0.8071	0.8071	0.1929	0.6323	0.8142	0.7658	0.2342	0.7241	0.7658	0.7428	0.7428	0.2572	0.5081	0.7212
LADTree	SymmerU	50	trees	0.7506	0.2494	0.8036	0.7506	0.7889	0.7889	0.2111	0.5382	0.7637	0.6948	0.3053	0.7241	0.6948	0.6948	0.6948	0.3053	0.3895	0.6948
VotedPerceptron	SymmerU	100*	functions	0.6627	0.3373	0.75	0.6627	0.7363	0.7363	0.2637	0.3921	0.6743	0.5184	0.4816	0.5862	0.5184	0.5209	0.5209	0.4792	0.0392	0.5166
J48	ReliefF	10	trees	0.6631	0.3369	0.7321	0.6631	0.6972	0.6972	0.3028	0.3586	0.6719	0.5395	0.4606	0.5517	0.5395	0.5361	0.5361	0.464	0.0755	0.5317
LMT	SymmerU	30	trees	0.8384	0.1616	0.8661	0.8384	0.8541	0.8541	0.1459	0.6923	0.8453	0.8211	0.179	0.8276	0.8211	0.8081	0.8081	0.1919	0.629	0.8134
J48graft	ReliefF	10	trees	0.6631	0.3369	0.7321	0.6631	0.6972	0.6972	0.3028	0.3586	0.6719	0.5395	0.4606	0.5517	0.5395	0.5361	0.5361	0.464	0.0755	0.5317
ZeroR	ReliefF	50	rules	0.5	0.5	0.6696	0.5	-0.1652	-0.1652	0.6652	-1	0.4011	0.5	0.5	0.6552	0.5	0.3276	0.3276	0.6724	-1	0.3959
END	ReliefF	30	meta	0.8252	0.1748	0.8393	0.8252	0.817	0.817	0.183	0.6422	0.8208	0.5684	0.4316	0.6207	0.5684	0.5722	0.5722	0.4278	0.1406	0.5695
AdaBoostM1	OneR	10	meta	0.7777	0.2223	0.8214	0.7777	0.8068	0.8068	0.1932	0.5838	0.7888	0.7474	0.2527	0.7931	0.7474	0.7797	0.7797	0.2203	0.5261	0.7584
Dagging	ReliefF	30	meta	0.8584	0.1416	0.8929	0.8584	0.8961	0.8961	0.1039	0.7535	0.8733	0.6447	0.3553	0.6897	0.6447	0.6528	0.6528	0.3472	0.2974	0.6478
Bagging	ReliefF	30	meta	0.7101	0.2899	0.7768	0.7101	0.7607	0.7607	0.2393	0.4681	0.7239	0.7237	0.2763	0.7931	0.7237	0.8079	0.8079	0.1921	0.5249	0.7411
MultiClassClassifier	ReliefF	30	meta	0.7845	0.2155	0.8214	0.7845	0.8028	0.8028	0.1972	0.5871	0.7922	0.5921	0.4079	0.6207	0.5921	0.5883	0.5883	0.4117	0.1805	0.5895
MultiBoostAB	ReliefF	30	meta	0.6901	0.3099	0.75	0.6901	0.7192	0.7192	0.2808	0.4082	0.6993	0.571	0.429	0.6552	0.571	0.5979	0.5979	0.4022	0.1667	0.5685
LogitBoost	ReliefF	30	meta	0.7438	0.2562	0.8036	0.7438	0.7948	0.7948	0.2052	0.5361	0.7594	0.8737	0.1263	0.8966	0.8737	0.8945	0.8945	0.1056	0.7678	0.8826
FilteredClassifier	ReliefF	30	meta	0.744	0.256	0.7946	0.744	0.7752	0.7752	0.2248	0.5182	0.7551	0.6158	0.3842	0.6207	0.6158	0.6058	0.6058	0.3943	0.2213	0.6037
MultilayerPerceptron	OneR	10	functions	0.644	0.356	0.6607	0.644	0.6325	0.6325	0.3675	0.2762	0.6345	0.6974	0.3026	0.7586	0.6974	0.7435	0.7435	0.2565	0.4385	0.7088
RBFNetwork	OneR	10	functions	0.7375	0.2625	0.7768	0.7375	0.7485	0.7485	0.2515	0.4858	0.7422	0.5948	0.4053	0.6552	0.5948	0.6072	0.6072	0.3929	0.2015	0.5972
SimpleLogistic	OneR	10	functions	0.724	0.276	0.7679	0.724	0.7384	0.7384	0.2616	0.4621	0.7299	0.671	0.329	0.7241	0.671	0.6935	0.6935	0.3066	0.3638	0.6778
SPegasos	OneR	10	functions	0.5	0.5	0.6696	0.5	-0.1652	-0.1652	0.6652	-1	0.4011	0.5	0.5	0.6552	0.5	0.3276	0.3276	0.6724	-1	0.3959
VotedPerceptron	OneR	10	functions	0.5409	0.4591	0.6786	0.5409	0.6224	0.6224	0.3776	0.1415	0.5076	0.4711	0.529	0.5862	0.4711	0.445	0.445	0.555	-0.0798	0.4351
IB1	OneR	10	lazy	0.6901	0.3099	0.75	0.6901	0.7192	0.7192	0.2808	0.4082	0.6993	0.6474	0.3527	0.7241	0.6474	0.7029	0.7029	0.2971	0.3458	0.6547
IBk	OneR	10	lazy	0.6901	0.3099	0.75	0.6901	0.7192	0.7192	0.2808	0.4082	0.6993	0.6474	0.3527	0.7241	0.6474	0.7029	0.7029	0.2971	0.3458	0.6547
KStar	OneR	10	lazy	0.7034	0.2966	0.7679	0.7034	0.746	0.746	0.254	0.4474	0.7156	0.5948	0.4053	0.6552	0.5948	0.6072	0.6072	0.3929	0.2015	0.5972
LMT	ReliefF	10	trees	0.7306	0.2694	0.7768	0.7306	0.75	0.75	0.25	0.4802	0.7382	0.5948	0.4053	0.6552	0.5948	0.6072	0.6072	0.3929	0.2015	0.5972
REPTree	ReliefF	100*	trees	0.6831	0.3169	0.7589	0.6831	0.7405	0.7405	0.2595	0.4197	0.6959	0.7237	0.2763	0.7931	0.7237	0.8079	0.8079	0.1921	0.5249	0.7411
RandomForest	SymmerU	30	trees	0.8856	0.1144	0.9018	0.8856	0.8911	0.8911	0.1089	0.7766	0.8882	0.7684	0.2316	0.7586	0.7684	0.7452	0.7452	0.2548	0.5131	0.7479
RandomTree	ReliefF	100*	trees	0.6364	0.3636	0.6964	0.6364	0.6507	0.6507	0.3493	0.2868	0.641	0.7184	0.2816	0.7241	0.7184	0.7034	0.7034	0.2966	0.4216	0.7071
NBTree	InfoGain	100*	trees	0.7577	0.2423	0.7946	0.7577	0.7696	0.7696	0.2304	0.5271	0.7629	0.6395	0.3606	0.6207	0.6395	0.6262	0.6262	0.3738	0.2653	0.6134
RandomForest	InfoGain	100*	trees	0.8115	0.1885	0.8393	0.8115	0.8208	0.8208	0.1792	0.6322	0.8158	0.7184	0.2816	0.7241	0.7184	0.7034	0.7034	0.2966	0.4216	0.7071
NBTree	ReliefF	10	trees	0.7171	0.2829	0.7679	0.7171	0.7399	0.7399	0.2601	0.4565	0.7255	0.4658	0.5342	0.5172	0.4658	0.4658	0.4658	0.5342	-0.0684	0.4658
LMT	InfoGain	100*	trees	0.7849	0.2151	0.8036	0.7849	0.7777	0.7777	0.2223	0.5625	0.7809	0.7684	0.2316	0.7586	0.7684	0.7452	0.7452	0.2548	0.5131	0.7479
J48	InfoGain	100*	trees	0.7512	0.2488	0.7768	0.7512	0.7479	0.7479	0.2521	0.499	0.7494	0.7158	0.2842	0.6897	0.7158	0.6952	0.6952	0.3048	0.4105	0.6837
IBk	SymmerU	10	lazy	0.7847	0.2153	0.8125	0.7847	0.7887	0.7887	0.2113	0.5734	0.7866	0.5921	0.4079	0.6207	0.5921	0.5883	0.5883	0.4117	0.1805	0.5895
DecisionStump	InfoGain	100*	trees	0.638	0.362	0.6161	0.638	0.6223	0.6223	0.3777	0.2598	0.607	0.6369	0.3631	0.5862	0.6369	0.6313	0.6313	0.3687	0.2681	0.5857
FT	InfoGain	100*	trees	0.8589	0.1411	0.8661	0.8589	0.8458	0.8458	0.1542	0.7046	0.8516	0.7948	0.2053	0.7931	0.7948	0.7746	0.7746	0.2255	0.5689	0.7803
HyperPipes	InfoGain	30	misc	0.7989	0.2011	0.7857	0.7989	0.7687	0.7687	0.2313	0.5668	0.7735	0.6606	0.3394	0.5862	0.6606	0.6695	0.6695	0.3306	0.3299	0.5857
KStar	OneR	100*	lazy	0.6353	0.3647	0.75	0.6353	0.7918	0.7918	0.2082	0.3974	0.6395	0.6474	0.3527	0.7241	0.6474	0.7029	0.7029	0.2971	0.3458	0.6547
RandomTree	InfoGain	100*	trees	0.6973	0.3027	0.7321	0.6973	0.6973	0.6973	0.3027	0.3946	0.6973	0.7684	0.2316	0.7586	0.7684	0.7452	0.7452	0.2548	0.5131	0.7479
REPTree	InfoGain	100*	trees	0.609	0.391	0.6964	0.609	0.6478	0.6478	0.3522	0.2538	0.613	0.6211	0.379	0.6897	0.6211	0.6494	0.6494	0.3507	0.2689	0.6256
IBk	SymmerU	50	lazy	0.7368	0.2632	0.8125	0.7368	0.8318	0.8318	0.1682	0.5606	0.7584	0.5448	0.4553	0.6207	0.5448	0.5552	0.5552	0.4448	0.0994	0.5423
KStar	SymmerU	50	lazy	0.5744	0.4256	0.7143	0.5744	0.781	0.781	0.219	0.2892	0.5475	0.6737	0.3263	0.7586	0.6737	0.775	0.775	0.225	0.4371	0.6853
VotedPerceptron	SymmerU	50	functions	0.7441	0.2559	0.7857	0.7441	0.7599	0.7599	0.2401	0.5038	0.7506	0.571	0.429	0.6552	0.571	0.5979	0.5979	0.4022	0.1667	0.5685
IB1	SymmerU	50	lazy	0.7368	0.2632	0.8125	0.7368	0.8318	0.8318	0.1682	0.5606	0.7584	0.5448	0.4553	0.6207	0.5448	0.5552	0.5552	0.4448	0.0994	0.5423
SimpleLogistic	SymmerU	50	functions	0.771	0.229	0.8125	0.771	0.7938	0.7938	0.2063	0.5643	0.7801	0.7684	0.2316	0.7586	0.7684	0.7452	0.7452	0.2548	0.5131	0.7479
SPegasos	SymmerU	50	functions	0.5542	0.4458	0.6964	0.5542	0.7048	0.7048	0.2952	0.2108	0.5192	0.5	0.5	0.6552	0.5	0.3276	0.3276	0.6724	-1	0.3959
MultilayerPerceptron	SymmerU	50	functions	0.8786	0.1214	0.9107	0.8786	0.9184	0.9184	0.0816	0.7959	0.8944	0.6921	0.3079	0.6897	0.6921	0.6755	0.6755	0.3245	0.3672	0.6758
RBFNetwork	SymmerU	50	functions	0.9061	0.0939	0.9018	0.9061	0.8833	0.8833	0.1167	0.7891	0.8924	0.8448	0.1553	0.8276	0.8448	0.8149	0.8149	0.1851	0.659	0.8199
NaiveBayesMultinomial	ReliefF	50	bayes	0.6438	0.3562	0.6696	0.6438	0.6357	0.6357	0.3643	0.2794	0.6382	0.5369	0.4632	0.5172	0.5369	0.5337	0.5337	0.4664	0.0704	0.512
LWL	SymmerU	50	lazy	0.6506	0.3494	0.6696	0.6506	0.6397	0.6397	0.3603	0.2901	0.6422	0.7474	0.2527	0.7931	0.7474	0.7797	0.7797	0.2203	0.5261	0.7584
AdaBoostM1	SymmerU	50	meta	0.7908	0.2092	0.8482	0.7908	0.8609	0.8609	0.1391	0.6479	0.8123	0.7684	0.2316	0.7586	0.7684	0.7452	0.7452	0.2548	0.5131	0.7479
FT	ReliefF	100*	trees	0.8247	0.1753	0.8661	0.8247	0.8663	0.8663	0.1337	0.6897	0.8403	0.7448	0.2552	0.7586	0.7448	0.7349	0.7349	0.2652	0.4795	0.7388
LibSVM	SymmerU	10	functions	0.5948	0.4052	0.7232	0.5948	0.7578	0.7578	0.2422	0.3126	0.5826	0.5211	0.479	0.6207	0.5211	0.5334	0.5334	0.4667	0.053	0.5055
NaiveBayesMultinomialUpdateable	OneR	10	bayes	0.6697	0.3303	0.7411	0.6697	0.7106	0.7106	0.2894	0.3782	0.6798	0.5684	0.4316	0.6207	0.5684	0.5722	0.5722	0.4278	0.1406	0.5695
HyperPipes	SymmerU	100*	misc	0.8659	0.1341	0.8571	0.8659	0.8368	0.8368	0.1632	0.7022	0.8461	0.7131	0.2869	0.6552	0.7131	0.7046	0.7046	0.2955	0.4176	0.6548
VFI	SymmerU	100*	misc	0.8391	0.1609	0.8304	0.8391	0.8099	0.8099	0.1901	0.6484	0.8182	0.7421	0.2579	0.7241	0.7421	0.7191	0.7191	0.281	0.4606	0.7157
MultiBoostAB	SymmerU	100*	meta	0.7371	0.2629	0.7946	0.7371	0.7798	0.7798	0.2202	0.5151	0.7507	0.6184	0.3816	0.6552	0.6184	0.6184	0.6184	0.3816	0.2368	0.6184
MultiClassClassifier	SymmerU	100*	meta	0.8245	0.1755	0.875	0.8245	0.8924	0.8924	0.1076	0.7137	0.8469	0.6447	0.3553	0.6897	0.6447	0.6528	0.6528	0.3472	0.2974	0.6478
FilteredClassifier	SymmerU	100*	meta	0.7577	0.2423	0.7946	0.7577	0.7696	0.7696	0.2304	0.5271	0.7629	0.671	0.329	0.7241	0.671	0.6935	0.6935	0.3066	0.3638	0.6778
LogitBoost	SymmerU	100*	meta	0.7441	0.2559	0.7857	0.7441	0.7599	0.7599	0.2401	0.5038	0.7506	0.7448	0.2552	0.7586	0.7448	0.7349	0.7349	0.2652	0.4795	0.7388
Decorate	SymmerU	100*	meta	0.8717	0.1283	0.9107	0.8717	0.9285	0.9285	0.0715	0.7982	0.8926	0.8474	0.1527	0.8621	0.8474	0.8474	0.8474	0.1527	0.6947	0.8474
END	SymmerU	100*	meta	0.7714	0.2286	0.7946	0.7714	0.7678	0.7678	0.2322	0.5391	0.7695	0.7711	0.229	0.7931	0.7711	0.7711	0.7711	0.229	0.5421	0.7711
Bagging	SymmerU	100*	meta	0.7908	0.2092	0.8482	0.7908	0.8609	0.8609	0.1391	0.6479	0.8123	0.85	0.15	0.8966	0.85	0.9318	0.9318	0.0682	0.7775	0.8752
Dagging	SymmerU	100*	meta	0.8315	0.1685	0.8661	0.8315	0.8594	0.8594	0.1406	0.6903	0.8429	0.8474	0.1527	0.8621	0.8474	0.8474	0.8474	0.1527	0.6947	0.8474
SPegasos	InfoGain	30	functions	0.6362	0.3638	0.7054	0.6362	0.6607	0.6607	0.3393	0.2959	0.6424	0.5869	0.4132	0.5517	0.5869	0.5809	0.5809	0.4191	0.1676	0.5496
SimpleLogistic	InfoGain	30	functions	0.8047	0.1953	0.8393	0.8047	0.8243	0.8243	0.1757	0.6287	0.813	0.7974	0.2027	0.8276	0.7974	0.8139	0.8139	0.1861	0.611	0.8043
RBFNetwork	InfoGain	30	functions	0.8587	0.1413	0.875	0.8587	0.8587	0.8587	0.1413	0.7175	0.8587	0.8448	0.1553	0.8276	0.8448	0.8149	0.8149	0.1851	0.659	0.8199
MultilayerPerceptron	InfoGain	30	functions	0.8115	0.1885	0.8393	0.8115	0.8208	0.8208	0.1792	0.6322	0.8158	0.8211	0.179	0.8276	0.8211	0.8081	0.8081	0.1919	0.629	0.8134
LibSVM	SymmerU	50	functions	0.5	0.5	0.6696	0.5	-0.1652	-0.1652	0.6652	-1	0.4011	0.5	0.5	0.6552	0.5	0.3276	0.3276	0.6724	-1	0.3959
IB1	InfoGain	30	lazy	0.7841	0.2159	0.8393	0.7841	0.8436	0.8436	0.1564	0.6249	0.8031	0.9237	0.0763	0.931	0.9237	0.9237	0.9237	0.0763	0.8474	0.9237
VotedPerceptron	InfoGain	30	functions	0.7034	0.2966	0.7679	0.7034	0.746	0.746	0.254	0.4474	0.7156	0.5869	0.4132	0.5517	0.5869	0.5809	0.5809	0.4191	0.1676	0.5496
ComplementNaiveBayes	SymmerU	50	bayes	0.8119	0.1881	0.8214	0.8119	0.7973	0.7973	0.2027	0.609	0.8033	0.5632	0.4369	0.5517	0.5632	0.5572	0.5572	0.4429	0.1202	0.5431
DMNBtext	SymmerU	50	bayes	0.6694	0.3306	0.7589	0.6694	0.7554	0.7554	0.2446	0.416	0.6823	0.6474	0.3527	0.7241	0.6474	0.7029	0.7029	0.2971	0.3458	0.6547
NaiveBayesMultinomial	SymmerU	50	bayes	0.8186	0.1814	0.8304	0.8186	0.8069	0.8069	0.1931	0.6254	0.812	0.5632	0.4369	0.5517	0.5632	0.5572	0.5572	0.4429	0.1202	0.5431
NaiveBayesMultinomialUpdateable	SymmerU	50	bayes	0.7305	0.2695	0.7857	0.7305	0.7657	0.7657	0.2343	0.4949	0.7422	0.6184	0.3816	0.6552	0.6184	0.6184	0.6184	0.3816	0.2368	0.6184
NaiveBayes	SymmerU	50	bayes	0.8858	0.1142	0.8929	0.8858	0.876	0.876	0.124	0.7617	0.8805	0.8184	0.1816	0.7931	0.8184	0.7881	0.7881	0.2119	0.6058	0.7868
Logistic	SymmerU	50	functions	0.8114	0.1886	0.8482	0.8114	0.8375	0.8375	0.1625	0.6483	0.822	0.6184	0.3816	0.6552	0.6184	0.6184	0.6184	0.3816	0.2368	0.6184
BayesianLogisticRegression	SymmerU	50	bayes	0.615	0.385	0.7411	0.615	0.8127	0.8127	0.1873	0.3792	0.6096	0.65	0.35	0.7586	0.65	0.8654	0.8654	0.1346	0.4682	0.653
BayesNet	SymmerU	50	bayes	0.9261	0.0739	0.9286	0.9261	0.9153	0.9153	0.0847	0.8414	0.9203	0.7948	0.2053	0.7931	0.7948	0.7746	0.7746	0.2255	0.5689	0.7803
Ridor	ReliefF	100*	rules	0.6975	0.3025	0.7232	0.6975	0.6903	0.6903	0.3097	0.3877	0.6933	0.671	0.329	0.7241	0.671	0.6935	0.6935	0.3066	0.3638	0.6778
NaiveBayesMultinomial	SymmerU	100*	bayes	0.7578	0.2422	0.7857	0.7578	0.7578	0.7578	0.2422	0.5157	0.7578	0.6658	0.3342	0.6552	0.6658	0.65	0.65	0.35	0.3154	0.6446
OneR	ReliefF	100*	rules	0.6162	0.3838	0.6786	0.6162	0.6284	0.6284	0.3716	0.2443	0.6199	0.6474	0.3527	0.7241	0.6474	0.7029	0.7029	0.2971	0.3458	0.6547
ComplementNaiveBayes	SymmerU	100*	bayes	0.7578	0.2422	0.7857	0.7578	0.7578	0.7578	0.2422	0.5157	0.7578	0.6658	0.3342	0.6552	0.6658	0.65	0.65	0.35	0.3154	0.6446
DMNBtext	InfoGain	10	bayes	0.5	0.5	0.6696	0.5	-0.1652	-0.1652	0.6652	-1	0.4011	0.5	0.5	0.6552	0.5	0.3276	0.3276	0.6724	-1	0.3959
LADTree	ReliefF	10	trees	0.6905	0.3095	0.7321	0.6905	0.6961	0.6961	0.3039	0.3865	0.693	0.5421	0.4579	0.5862	0.5421	0.5421	0.5421	0.4579	0.0842	0.5421
BayesianLogisticRegression	SymmerU	100*	bayes	0.6656	0.3344	0.6071	0.6656	0.6549	0.6549	0.3451	0.3203	0.606	0.5316	0.4684	0.4483	0.5316	0.539	0.539	0.4611	0.0702	0.4423
J48	OneR	30	trees	0.7178	0.2822	0.7321	0.7178	0.7037	0.7037	0.2963	0.4213	0.7083	0.6447	0.3553	0.6897	0.6447	0.6528	0.6528	0.3472	0.2974	0.6478
DecisionTable	OneR	50	rules	0.7032	0.2968	0.7768	0.7032	0.767	0.767	0.233	0.4659	0.7184	0.6369	0.3631	0.5862	0.6369	0.6313	0.6313	0.3687	0.2681	0.5857
DTNB	OneR	50	rules	0.7645	0.2355	0.7946	0.7645	0.7683	0.7683	0.2317	0.5328	0.7663	0.6948	0.3053	0.7241	0.6948	0.6948	0.6948	0.3053	0.3895	0.6948
NNge	OneR	50	rules	0.7512	0.2488	0.7768	0.7512	0.7479	0.7479	0.2521	0.499	0.7494	0.7684	0.2316	0.7586	0.7684	0.7452	0.7452	0.2548	0.5131	0.7479
MultilayerPerceptron	SymmerU	10	functions	0.8245	0.1755	0.875	0.8245	0.8924	0.8924	0.1076	0.7137	0.8469	0.6974	0.3026	0.7586	0.6974	0.7435	0.7435	0.2565	0.4385	0.7088
RandomForest	OneR	30	trees	0.8249	0.1751	0.8571	0.8249	0.8458	0.8458	0.1542	0.6703	0.8338	0.7448	0.2552	0.7586	0.7448	0.7349	0.7349	0.2652	0.4795	0.7388
Ridor	OneR	50	rules	0.7714	0.2286	0.7946	0.7714	0.7678	0.7678	0.2322	0.5391	0.7695	0.6	0.4	0.7241	0.6	0.8519	0.8519	0.1482	0.3752	0.5797
LMT	OneR	30	trees	0.7647	0.2353	0.7857	0.7647	0.758	0.758	0.242	0.5226	0.761	0.8974	0.1027	0.8966	0.8974	0.8813	0.8813	0.1187	0.7785	0.888
ADTree	OneR	50	trees	0.771	0.229	0.8125	0.771	0.7938	0.7938	0.2063	0.5643	0.7801	0.7237	0.2763	0.7931	0.7237	0.8079	0.8079	0.1921	0.5249	0.7411
BFTree	OneR	50	trees	0.6705	0.3295	0.7054	0.6705	0.6682	0.6682	0.3318	0.3387	0.6693	0.6737	0.3263	0.7586	0.6737	0.775	0.775	0.225	0.4371	0.6853
RandomTree	OneR	30	trees	0.7178	0.2822	0.7321	0.7178	0.7037	0.7037	0.2963	0.4213	0.7083	0.5921	0.4079	0.6207	0.5921	0.5883	0.5883	0.4117	0.1805	0.5895
RandomForest	ReliefF	10	trees	0.7647	0.2353	0.7857	0.7647	0.758	0.758	0.242	0.5226	0.761	0.5395	0.4606	0.5517	0.5395	0.5361	0.5361	0.464	0.0755	0.5317
LWL	SymmerU	10	lazy	0.7245	0.2755	0.7411	0.7245	0.7119	0.7119	0.2881	0.4362	0.7165	0.7448	0.2552	0.7586	0.7448	0.7349	0.7349	0.2652	0.4795	0.7388
AdaBoostM1	SymmerU	10	meta	0.8115	0.1885	0.8393	0.8115	0.8208	0.8208	0.1792	0.6322	0.8158	0.7158	0.2842	0.6897	0.7158	0.6952	0.6952	0.3048	0.4105	0.6837
RandomTree	ReliefF	10	trees	0.6705	0.3295	0.7054	0.6705	0.6682	0.6682	0.3318	0.3387	0.6693	0.5395	0.4606	0.5517	0.5395	0.5361	0.5361	0.464	0.0755	0.5317
REPTree	ReliefF	10	trees	0.6436	0.3564	0.6786	0.6436	0.64	0.64	0.36	0.2836	0.6415	0.5737	0.4263	0.6897	0.5737	0.6795	0.6795	0.3205	0.23	0.5538
J48	ReliefF	50	trees	0.8387	0.1613	0.8482	0.8387	0.8264	0.8264	0.1736	0.665	0.8318	0.5948	0.4053	0.6552	0.5948	0.6072	0.6072	0.3929	0.2015	0.5972
OneR	GainRatio	50	rules	0.5553	0.4447	0.6429	0.5553	0.5706	0.5706	0.4294	0.125	0.554	0.6737	0.3263	0.7586	0.6737	0.775	0.775	0.225	0.4371	0.6853
LibSVM	SymmerU	30	functions	0.5	0.5	0.6696	0.5	-0.1652	-0.1652	0.6652	-1	0.4011	0.55	0.45	0.6897	0.55	0.8393	0.8393	0.1607	0.2605	0.4952
Ridor	ReliefF	50	rules	0.6771	0.3229	0.7143	0.6771	0.6771	0.6771	0.3229	0.3542	0.6771	0.5684	0.4316	0.6207	0.5684	0.5722	0.5722	0.4278	0.1406	0.5695
KStar	GainRatio	10	lazy	0.5677	0.4323	0.7054	0.5677	0.726	0.726	0.274	0.2475	0.5412	0.5948	0.4053	0.6552	0.5948	0.6072	0.6072	0.3929	0.2015	0.5972
OneR	ReliefF	50	rules	0.5688	0.4312	0.6518	0.5688	0.5854	0.5854	0.4146	0.1534	0.5694	0.5474	0.4527	0.6552	0.5474	0.59	0.59	0.41	0.1306	0.5292
RBFNetwork	GainRatio	10	functions	0.8586	0.1414	0.8839	0.8586	0.8752	0.8752	0.1248	0.7336	0.866	0.6395	0.3606	0.6207	0.6395	0.6262	0.6262	0.3738	0.2653	0.6134
DTNB	ReliefF	50	rules	0.7847	0.2153	0.8125	0.7847	0.7887	0.7887	0.2113	0.5734	0.7866	0.5684	0.4316	0.6207	0.5684	0.5722	0.5722	0.4278	0.1406	0.5695
SPegasos	GainRatio	10	functions	0.5	0.5	0.6696	0.5	-0.1652	-0.1652	0.6652	-1	0.4011	0.5	0.5	0.6552	0.5	0.3276	0.3276	0.6724	-1	0.3959
ConjunctiveRule	ReliefF	50	rules	0.5951	0.4049	0.7054	0.5951	0.6719	0.6719	0.3281	0.2557	0.5922	0.6237	0.3763	0.7241	0.6237	0.735	0.735	0.265	0.341	0.6234
Logistic	SymmerU	30	functions	0.7645	0.2355	0.7946	0.7645	0.7683	0.7683	0.2317	0.5328	0.7663	0.7684	0.2316	0.7586	0.7684	0.7452	0.7452	0.2548	0.5131	0.7479
NaiveBayes	SymmerU	30	bayes	0.8924	0.1076	0.9018	0.8924	0.8873	0.8873	0.1127	0.7797	0.8898	0.7948	0.2053	0.7931	0.7948	0.7746	0.7746	0.2255	0.5689	0.7803
BayesNet	SymmerU	30	bayes	0.9259	0.0741	0.9375	0.9259	0.932	0.932	0.068	0.8579	0.9289	0.7684	0.2316	0.7586	0.7684	0.7452	0.7452	0.2548	0.5131	0.7479
BayesianLogisticRegression	SymmerU	30	bayes	0.7786	0.2214	0.7768	0.7786	0.7546	0.7546	0.2454	0.5326	0.7607	0.5895	0.4106	0.5862	0.5895	0.581	0.581	0.4191	0.1702	0.5736
AdaBoostM1	GainRatio	10	meta	0.6894	0.3106	0.7857	0.6894	0.8254	0.8254	0.1746	0.4965	0.7072	0.6474	0.3527	0.7241	0.6474	0.7029	0.7029	0.2971	0.3458	0.6547
ComplementNaiveBayes	SymmerU	30	bayes	0.7447	0.2553	0.7589	0.7447	0.731	0.731	0.269	0.4754	0.736	0.5869	0.4132	0.5517	0.5869	0.5809	0.5809	0.4191	0.1676	0.5496
NaiveBayesMultinomialUpdateable	SymmerU	30	bayes	0.7101	0.2899	0.7768	0.7101	0.7607	0.7607	0.2393	0.4681	0.7239	0.5158	0.4842	0.5517	0.5158	0.5152	0.5152	0.4849	0.0309	0.5148
NaiveBayesMultinomial	SymmerU	30	bayes	0.758	0.242	0.7768	0.758	0.7486	0.7486	0.2514	0.5065	0.7526	0.5369	0.4632	0.5172	0.5369	0.5337	0.5337	0.4664	0.0704	0.512
VFI	InfoGain	10	misc	0.7177	0.2823	0.7411	0.7177	0.7097	0.7097	0.2903	0.4273	0.713	0.7184	0.2816	0.7241	0.7184	0.7034	0.7034	0.2966	0.4216	0.7071
HyperPipes	InfoGain	10	misc	0.7186	0.2814	0.6964	0.7186	0.6935	0.6935	0.3065	0.4113	0.6864	0.5553	0.4448	0.4483	0.5553	0.5875	0.5875	0.4125	0.1391	0.4314
END	InfoGain	10	meta	0.7036	0.2964	0.7589	0.7036	0.7297	0.7297	0.2703	0.4325	0.7125	0.5895	0.4106	0.5862	0.5895	0.581	0.581	0.4191	0.1702	0.5736
Decorate	InfoGain	10	meta	0.7845	0.2155	0.8214	0.7845	0.8028	0.8028	0.1972	0.5871	0.7922	0.7448	0.2552	0.7586	0.7448	0.7349	0.7349	0.2652	0.4795	0.7388
Dagging	InfoGain	10	meta	0.8047	0.1953	0.8393	0.8047	0.8243	0.8243	0.1757	0.6287	0.813	0.7737	0.2263	0.8276	0.7737	0.8377	0.8377	0.1624	0.608	0.7919
Bagging	InfoGain	10	meta	0.7573	0.2427	0.8125	0.7573	0.8036	0.8036	0.1964	0.559	0.7724	0.7737	0.2263	0.8276	0.7737	0.8377	0.8377	0.1624	0.608	0.7919
MultiClassClassifier	InfoGain	10	meta	0.8115	0.1885	0.8393	0.8115	0.8208	0.8208	0.1792	0.6322	0.8158	0.8974	0.1027	0.8966	0.8974	0.8813	0.8813	0.1187	0.7785	0.888
MultiBoostAB	InfoGain	10	meta	0.7778	0.2222	0.8125	0.7778	0.7907	0.7907	0.2093	0.5684	0.7835	0.7684	0.2316	0.7586	0.7684	0.7452	0.7452	0.2548	0.5131	0.7479
LogitBoost	InfoGain	10	meta	0.7575	0.2425	0.8036	0.7575	0.7845	0.7845	0.2155	0.5413	0.7677	0.8211	0.179	0.8276	0.8211	0.8081	0.8081	0.1919	0.629	0.8134
FilteredClassifier	InfoGain	10	meta	0.7778	0.2222	0.8125	0.7778	0.7907	0.7907	0.2093	0.5684	0.7835	0.6211	0.379	0.6897	0.6211	0.6494	0.6494	0.3507	0.2689	0.6256
Dagging	OneR	10	meta	0.6223	0.3777	0.7143	0.6223	0.6777	0.6777	0.3223	0.2949	0.6278	0.6474	0.3527	0.7241	0.6474	0.7029	0.7029	0.2971	0.3458	0.6547
Bagging	OneR	10	meta	0.7303	0.2697	0.7946	0.7303	0.7858	0.7858	0.2142	0.5131	0.746	0.7211	0.279	0.7586	0.7211	0.7333	0.7333	0.2667	0.4542	0.7261
END	OneR	10	meta	0.6501	0.3499	0.6964	0.6501	0.6545	0.6545	0.3455	0.3046	0.652	0.5474	0.4527	0.6552	0.5474	0.59	0.59	0.41	0.1306	0.5292
Decorate	OneR	10	meta	0.7573	0.2427	0.8125	0.7573	0.8036	0.8036	0.1964	0.559	0.7724	0.7211	0.279	0.7586	0.7211	0.7333	0.7333	0.2667	0.4542	0.7261
LogitBoost	OneR	10	meta	0.7777	0.2223	0.8214	0.7777	0.8068	0.8068	0.1932	0.5838	0.7888	0.7237	0.2763	0.7931	0.7237	0.8079	0.8079	0.1921	0.5249	0.7411
FilteredClassifier	OneR	10	meta	0.7106	0.2894	0.75	0.7106	0.7169	0.7169	0.2831	0.4275	0.7135	0.6447	0.3553	0.6897	0.6447	0.6528	0.6528	0.3472	0.2974	0.6478
MultiClassClassifier	OneR	10	meta	0.7108	0.2892	0.7411	0.7108	0.708	0.708	0.292	0.4188	0.7094	0.6974	0.3026	0.7586	0.6974	0.7435	0.7435	0.2565	0.4385	0.7088
MultiBoostAB	OneR	10	meta	0.7573	0.2427	0.8125	0.7573	0.8036	0.8036	0.1964	0.559	0.7724	0.6974	0.3026	0.7586	0.6974	0.7435	0.7435	0.2565	0.4385	0.7088
VFI	OneR	10	misc	0.6777	0.3223	0.6875	0.6777	0.6624	0.6624	0.3376	0.3397	0.665	0.4658	0.5342	0.5172	0.4658	0.4658	0.4658	0.5342	-0.0684	0.4658
HyperPipes	OneR	10	misc	0.6254	0.3746	0.5625	0.6254	0.6208	0.6208	0.3792	0.2462	0.5622	0.5579	0.4421	0.4828	0.5579	0.5655	0.5655	0.4345	0.1231	0.4803
REPTree	GainRatio	50	trees	0.6625	0.3375	0.7589	0.6625	0.7665	0.7665	0.2335	0.4163	0.6747	0.5421	0.4579	0.5862	0.5421	0.5421	0.5421	0.4579	0.0842	0.5421
VFI	GainRatio	30	misc	0.9198	0.0802	0.9018	0.9198	0.8837	0.8837	0.1163	0.8027	0.8947	0.7632	0.2369	0.6897	0.7632	0.7632	0.7632	0.2369	0.5263	0.6897
SPegasos	GainRatio	100*	functions	0.5	0.5	0.6696	0.5	-0.1652	-0.1652	0.6652	-1	0.4011	0.5	0.5	0.6552	0.5	0.3276	0.3276	0.6724	-1	0.3959
ZeroR	OneR	30	rules	0.5	0.5	0.6696	0.5	-0.1652	-0.1652	0.6652	-1	0.4011	0.5	0.5	0.6552	0.5	0.3276	0.3276	0.6724	-1	0.3959
NaiveBayesMultinomial	InfoGain	100*	bayes	0.7786	0.2214	0.7768	0.7786	0.7546	0.7546	0.2454	0.5326	0.7607	0.5105	0.4895	0.4828	0.5105	0.5098	0.5098	0.4902	0.0203	0.4803
ADTree	InfoGain	30	trees	0.7032	0.2968	0.7768	0.7032	0.767	0.767	0.233	0.4659	0.7184	0.7948	0.2053	0.7931	0.7948	0.7746	0.7746	0.2255	0.5689	0.7803
NBTree	SymmerU	30	trees	0.8384	0.1616	0.8661	0.8384	0.8541	0.8541	0.1459	0.6923	0.8453	0.5948	0.4053	0.6552	0.5948	0.6072	0.6072	0.3929	0.2015	0.5972
SimpleLogistic	GainRatio	100*	functions	0.8652	0.1348	0.8929	0.8652	0.8888	0.8888	0.1112	0.7536	0.8753	0.6948	0.3053	0.7241	0.6948	0.6948	0.6948	0.3053	0.3895	0.6948
LADTree	SymmerU	30	trees	0.751	0.249	0.7857	0.751	0.7584	0.7584	0.2416	0.5094	0.7544	0.6158	0.3842	0.6207	0.6158	0.6058	0.6058	0.3943	0.2213	0.6037
RandomForest	GainRatio	50	trees	0.8247	0.1753	0.8661	0.8247	0.8663	0.8663	0.1337	0.6897	0.8403	0.6921	0.3079	0.6897	0.6921	0.6755	0.6755	0.3245	0.3672	0.6758
J48	SymmerU	30	trees	0.8591	0.1409	0.8571	0.8591	0.8359	0.8359	0.1641	0.6946	0.8444	0.5369	0.4632	0.5172	0.5369	0.5337	0.5337	0.4664	0.0704	0.512
J48graft	SymmerU	30	trees	0.8115	0.1885	0.8393	0.8115	0.8208	0.8208	0.1792	0.6322	0.8158	0.6684	0.3316	0.6897	0.6684	0.6617	0.6617	0.3384	0.33	0.6641
DecisionStump	SymmerU	30	trees	0.6712	0.3288	0.6696	0.6712	0.6532	0.6532	0.3468	0.3239	0.6523	0.6369	0.3631	0.5862	0.6369	0.6313	0.6313	0.3687	0.2681	0.5857
FT	SymmerU	30	trees	0.8654	0.1346	0.8839	0.8654	0.8706	0.8706	0.1294	0.736	0.8679	0.7448	0.2552	0.7586	0.7448	0.7349	0.7349	0.2652	0.4795	0.7388
RBFNetwork	SymmerU	100*	functions	0.8993	0.1007	0.9018	0.8993	0.8847	0.8847	0.1153	0.7839	0.8912	0.8948	0.1053	0.8621	0.8948	0.8572	0.8572	0.1429	0.7509	0.8579
RandomTree	SymmerU	30	trees	0.7443	0.2557	0.7768	0.7443	0.7478	0.7478	0.2522	0.4921	0.746	0.6895	0.3106	0.6552	0.6895	0.6731	0.6731	0.3269	0.3622	0.6515
REPTree	SymmerU	30	trees	0.6569	0.3431	0.6964	0.6569	0.6569	0.6569	0.3431	0.3139	0.6569	0.5421	0.4579	0.5862	0.5421	0.5421	0.5421	0.4579	0.0842	0.5421
BFTree	GainRatio	50	trees	0.6897	0.3103	0.7679	0.6897	0.7572	0.7572	0.2428	0.4418	0.7041	0.6684	0.3316	0.6897	0.6684	0.6617	0.6617	0.3384	0.33	0.6641
ADTree	GainRatio	50	trees	0.7915	0.2085	0.8125	0.7915	0.7877	0.7877	0.2123	0.5792	0.7895	0.6211	0.379	0.6897	0.6211	0.6494	0.6494	0.3507	0.2689	0.6256
RBFNetwork	GainRatio	100*	functions	0.8995	0.1005	0.8929	0.8995	0.8736	0.8736	0.1264	0.7726	0.8833	0.7974	0.2027	0.8276	0.7974	0.8139	0.8139	0.1861	0.611	0.8043
RandomTree	GainRatio	100*	trees	0.7506	0.2494	0.8036	0.7506	0.7889	0.7889	0.2111	0.5382	0.7637	0.6684	0.3316	0.6897	0.6684	0.6617	0.6617	0.3384	0.33	0.6641
DecisionTable	GainRatio	50	rules	0.6832	0.3168	0.75	0.6832	0.7216	0.7216	0.2784	0.403	0.6938	0.6684	0.3316	0.6897	0.6684	0.6617	0.6617	0.3384	0.33	0.6641
ConjunctiveRule	GainRatio	50	rules	0.5679	0.4321	0.6964	0.5679	0.6697	0.6697	0.3303	0.2147	0.5492	0.6237	0.3763	0.7241	0.6237	0.735	0.735	0.265	0.341	0.6234
NNge	GainRatio	50	rules	0.893	0.107	0.875	0.893	0.857	0.857	0.143	0.7491	0.8667	0.6869	0.3132	0.6207	0.6869	0.6869	0.6869	0.3132	0.3737	0.6207
DTNB	GainRatio	50	rules	0.7438	0.2562	0.8036	0.7438	0.7948	0.7948	0.2052	0.5361	0.7594	0.6184	0.3816	0.6552	0.6184	0.6184	0.6184	0.3816	0.2368	0.6184
PART	GainRatio	50	rules	0.6768	0.3232	0.7321	0.6768	0.6953	0.6953	0.3047	0.3716	0.6833	0.5684	0.4316	0.6207	0.5684	0.5722	0.5722	0.4278	0.1406	0.5695
ZeroR	InfoGain	30	rules	0.5	0.5	0.6696	0.5	-0.1652	-0.1652	0.6652	-1	0.4011	0.5	0.5	0.6552	0.5	0.3276	0.3276	0.6724	-1	0.3959
ZeroR	GainRatio	50	rules	0.5	0.5	0.6696	0.5	-0.1652	-0.1652	0.6652	-1	0.4011	0.5	0.5	0.6552	0.5	0.3276	0.3276	0.6724	-1	0.3959
Ridor	GainRatio	50	rules	0.6562	0.3438	0.7321	0.6562	0.6993	0.6993	0.3007	0.3529	0.6655	0.5948	0.4053	0.6552	0.5948	0.6072	0.6072	0.3929	0.2015	0.5972
ADTree	OneR	30	trees	0.724	0.276	0.7679	0.724	0.7384	0.7384	0.2616	0.4621	0.7299	0.7474	0.2527	0.7931	0.7474	0.7797	0.7797	0.2203	0.5261	0.7584
RandomTree	GainRatio	50	trees	0.7778	0.2222	0.8125	0.7778	0.7907	0.7907	0.2093	0.5684	0.7835	0.5921	0.4079	0.6207	0.5921	0.5883	0.5883	0.4117	0.1805	0.5895
RBFNetwork	OneR	100*	functions	0.8459	0.1541	0.8304	0.8459	0.8125	0.8125	0.1875	0.6576	0.8199	0.7421	0.2579	0.7241	0.7421	0.7191	0.7191	0.281	0.4606	0.7157
LADTree	GainRatio	50	trees	0.6966	0.3034	0.7679	0.6966	0.7508	0.7508	0.2492	0.4441	0.7101	0.4895	0.5105	0.5172	0.4895	0.4902	0.4902	0.5098	-0.0203	0.4873
LMT	GainRatio	50	trees	0.8182	0.1818	0.8482	0.8182	0.833	0.833	0.167	0.651	0.8247	0.6447	0.3553	0.6897	0.6447	0.6528	0.6528	0.3472	0.2974	0.6478
NBTree	GainRatio	50	trees	0.724	0.276	0.7679	0.724	0.7384	0.7384	0.2616	0.4621	0.7299	0.6421	0.3579	0.6552	0.6421	0.6324	0.6324	0.3677	0.2743	0.6339
DecisionStump	InfoGain	50	trees	0.638	0.362	0.6161	0.638	0.6223	0.6223	0.3777	0.2598	0.607	0.6369	0.3631	0.5862	0.6369	0.6313	0.6313	0.3687	0.2681	0.5857
DecisionStump	GainRatio	50	trees	0.6153	0.3847	0.7232	0.6153	0.7083	0.7083	0.2917	0.31	0.6169	0.6237	0.3763	0.7241	0.6237	0.735	0.735	0.265	0.341	0.6234
FT	GainRatio	50	trees	0.8384	0.1616	0.8661	0.8384	0.8541	0.8541	0.1459	0.6923	0.8453	0.7184	0.2816	0.7241	0.7184	0.7034	0.7034	0.2966	0.4216	0.7071
J48	GainRatio	50	trees	0.7982	0.2018	0.8214	0.7982	0.7982	0.7982	0.2018	0.5964	0.7982	0.5658	0.4342	0.5862	0.5658	0.5613	0.5613	0.4387	0.127	0.5606
J48graft	GainRatio	50	trees	0.7034	0.2966	0.7679	0.7034	0.746	0.746	0.254	0.4474	0.7156	0.5684	0.4316	0.6207	0.5684	0.5722	0.5722	0.4278	0.1406	0.5695
ZeroR	InfoGain	100*	rules	0.5	0.5	0.6696	0.5	-0.1652	-0.1652	0.6652	-1	0.4011	0.5	0.5	0.6552	0.5	0.3276	0.3276	0.6724	-1	0.3959
BFTree	ReliefF	50	trees	0.7306	0.2694	0.7768	0.7306	0.75	0.75	0.25	0.4802	0.7382	0.6237	0.3763	0.7241	0.6237	0.735	0.735	0.265	0.341	0.6234
LWL	GainRatio	100*	lazy	0.6092	0.3908	0.6875	0.6092	0.6355	0.6355	0.3645	0.2433	0.6135	0.6474	0.3527	0.7241	0.6474	0.7029	0.7029	0.2971	0.3458	0.6547
LWL	OneR	10	lazy	0.7105	0.2895	0.7589	0.7105	0.7281	0.7281	0.2719	0.4382	0.7173	0.7474	0.2527	0.7931	0.7474	0.7797	0.7797	0.2203	0.5261	0.7584
AdaBoostM1	GainRatio	100*	meta	0.7503	0.2497	0.8214	0.7503	0.8393	0.8393	0.1607	0.5828	0.7724	0.5684	0.4316	0.6207	0.5684	0.5722	0.5722	0.4278	0.1406	0.5695
Decorate	ReliefF	30	meta	0.818	0.182	0.8571	0.818	0.8515	0.8515	0.1485	0.6686	0.8311	0.571	0.429	0.6552	0.571	0.5979	0.5979	0.4022	0.1667	0.5685
IB1	OneR	100*	lazy	0.7097	0.2903	0.7946	0.7097	0.8163	0.8163	0.1837	0.5151	0.7294	0.7474	0.2527	0.7931	0.7474	0.7797	0.7797	0.2203	0.5261	0.7584
REPTree	GainRatio	100*	trees	0.649	0.351	0.75	0.649	0.756	0.756	0.244	0.3906	0.6584	0.5421	0.4579	0.5862	0.5421	0.5421	0.5421	0.4579	0.0842	0.5421
AdaBoostM1	OneR	100*	meta	0.7503	0.2497	0.8214	0.7503	0.8393	0.8393	0.1607	0.5828	0.7724	0.671	0.329	0.7241	0.671	0.6935	0.6935	0.3066	0.3638	0.6778
BFTree	InfoGain	100*	trees	0.7038	0.2962	0.75	0.7038	0.7169	0.7169	0.2831	0.4205	0.7091	0.7448	0.2552	0.7586	0.7448	0.7349	0.7349	0.2652	0.4795	0.7388
ADTree	InfoGain	100*	trees	0.6766	0.3234	0.7411	0.6766	0.7083	0.7083	0.2917	0.3836	0.6857	0.7711	0.229	0.7931	0.7711	0.7711	0.7711	0.229	0.5421	0.7711
LMT	GainRatio	100*	trees	0.8652	0.1348	0.8929	0.8652	0.8888	0.8888	0.1112	0.7536	0.8753	0.6948	0.3053	0.7241	0.6948	0.6948	0.6948	0.3053	0.3895	0.6948
Ridor	InfoGain	100*	rules	0.6968	0.3032	0.7589	0.6968	0.7321	0.7321	0.2679	0.4274	0.7074	0.6421	0.3579	0.6552	0.6421	0.6324	0.6324	0.3677	0.2743	0.6339
RandomForest	GainRatio	100*	trees	0.7708	0.2292	0.8214	0.7708	0.8122	0.8122	0.1878	0.5816	0.7852	0.7474	0.2527	0.7931	0.7474	0.7797	0.7797	0.2203	0.5261	0.7584
LWL	OneR	100*	lazy	0.6236	0.3764	0.6518	0.6236	0.6167	0.6167	0.3833	0.2402	0.6187	0.7974	0.2027	0.8276	0.7974	0.8139	0.8139	0.1861	0.611	0.8043
FT	GainRatio	100*	trees	0.8517	0.1483	0.8839	0.8517	0.8813	0.8813	0.1188	0.7324	0.8639	0.6447	0.3553	0.6897	0.6447	0.6528	0.6528	0.3472	0.2974	0.6478
DecisionStump	GainRatio	100*	trees	0.5488	0.4512	0.625	0.5488	0.5563	0.5563	0.4437	0.1049	0.5489	0.6237	0.3763	0.7241	0.6237	0.735	0.735	0.265	0.341	0.6234
J48graft	GainRatio	100*	trees	0.6559	0.3441	0.75	0.6559	0.7448	0.7448	0.2552	0.3906	0.6667	0.7211	0.279	0.7586	0.7211	0.7333	0.7333	0.2667	0.4542	0.7261
J48	GainRatio	100*	trees	0.7643	0.2357	0.8036	0.7643	0.7814	0.7814	0.2186	0.5454	0.7714	0.6421	0.3579	0.6552	0.6421	0.6324	0.6324	0.3677	0.2743	0.6339
DMNBtext	OneR	30	bayes	0.6627	0.3373	0.75	0.6627	0.7363	0.7363	0.2637	0.3921	0.6743	0.6974	0.3026	0.7586	0.6974	0.7435	0.7435	0.2565	0.4385	0.7088
ComplementNaiveBayes	OneR	30	bayes	0.6771	0.3229	0.7143	0.6771	0.6771	0.6771	0.3229	0.3542	0.6771	0.4606	0.5395	0.4483	0.4606	0.464	0.464	0.5361	-0.0755	0.4423
NaiveBayesMultinomialUpdateable	OneR	30	bayes	0.6768	0.3232	0.7321	0.6768	0.6953	0.6953	0.3047	0.3716	0.6833	0.5658	0.4342	0.5862	0.5658	0.5613	0.5613	0.4387	0.127	0.5606
NaiveBayesMultinomial	OneR	30	bayes	0.6771	0.3229	0.7143	0.6771	0.6771	0.6771	0.3229	0.3542	0.6771	0.4606	0.5395	0.4483	0.4606	0.464	0.464	0.5361	-0.0755	0.4423
Logistic	OneR	30	functions	0.6299	0.3701	0.6786	0.6299	0.6338	0.6338	0.3662	0.2636	0.6316	0.6737	0.3263	0.7586	0.6737	0.775	0.775	0.225	0.4371	0.6853
NaiveBayes	OneR	30	bayes	0.8049	0.1951	0.8304	0.8049	0.8092	0.8092	0.1908	0.6141	0.8069	0.7684	0.2316	0.7586	0.7684	0.7452	0.7452	0.2548	0.5131	0.7479
BayesNet	OneR	30	bayes	0.8252	0.1748	0.8393	0.8252	0.817	0.817	0.183	0.6422	0.8208	0.7711	0.229	0.7931	0.7711	0.7711	0.7711	0.229	0.5421	0.7711
BayesianLogisticRegression	OneR	30	bayes	0.6016	0.3984	0.7232	0.6016	0.735	0.735	0.265	0.3091	0.5951	0.55	0.45	0.6897	0.55	0.8393	0.8393	0.1607	0.2605	0.4952
LibSVM	OneR	30	functions	0.5	0.5	0.6696	0.5	-0.1652	-0.1652	0.6652	-1	0.4011	0.5	0.5	0.6552	0.5	0.3276	0.3276	0.6724	-1	0.3959
ComplementNaiveBayes	ReliefF	30	bayes	0.664	0.336	0.6875	0.664	0.6548	0.6548	0.3452	0.3186	0.6578	0.5869	0.4132	0.5517	0.5869	0.5809	0.5809	0.4191	0.1676	0.5496
DMNBtext	ReliefF	30	bayes	0.642	0.358	0.7589	0.642	0.8283	0.8283	0.1717	0.4318	0.6473	0.5737	0.4263	0.6897	0.5737	0.6795	0.6795	0.3205	0.23	0.5538
NaiveBayesMultinomial	ReliefF	30	bayes	0.6369	0.3631	0.6696	0.6369	0.6319	0.6319	0.3681	0.2688	0.6339	0.6132	0.3869	0.5862	0.6132	0.6034	0.6034	0.3967	0.2163	0.5818
NaiveBayesMultinomialUpdateable	ReliefF	30	bayes	0.6099	0.3901	0.6518	0.6099	0.6085	0.6085	0.3915	0.2184	0.6091	0.5132	0.4869	0.5172	0.5132	0.5119	0.5119	0.4881	0.025	0.5024
NaiveBayes	ReliefF	30	bayes	0.8723	0.1277	0.8839	0.8723	0.8674	0.8674	0.1326	0.7396	0.8697	0.5921	0.4079	0.6207	0.5921	0.5883	0.5883	0.4117	0.1805	0.5895
Logistic	ReliefF	30	functions	0.7845	0.2155	0.8214	0.7845	0.8028	0.8028	0.1972	0.5871	0.7922	0.5921	0.4079	0.6207	0.5921	0.5883	0.5883	0.4117	0.1805	0.5895
BayesianLogisticRegression	ReliefF	30	bayes	0.5	0.5	0.3304	0.5	-0.3348	-0.3348	0.8348	-1	0.2483	0.5	0.5	0.3448	0.5	0.1724	0.1724	0.8276	-1	0.2564
BayesNet	ReliefF	30	bayes	0.8254	0.1746	0.8304	0.8254	0.8071	0.8071	0.1929	0.6323	0.8142	0.5421	0.4579	0.5862	0.5421	0.5421	0.5421	0.4579	0.0842	0.5421
LibSVM	ReliefF	30	functions	0.5	0.5	0.6696	0.5	-0.1652	-0.1652	0.6652	-1	0.4011	0.5	0.5	0.6552	0.5	0.3276	0.3276	0.6724	-1	0.3959
HyperPipes	ReliefF	30	misc	0.6854	0.3146	0.6429	0.6854	0.6667	0.6667	0.3333	0.3516	0.6387	0.5079	0.4921	0.4483	0.5079	0.5084	0.5084	0.4917	0.0162	0.4477
REPTree	OneR	100*	trees	0.6157	0.3843	0.7054	0.6157	0.6621	0.6621	0.3379	0.2739	0.6203	0.8474	0.1527	0.8621	0.8474	0.8474	0.8474	0.1527	0.6947	0.8474
J48graft	InfoGain	100*	trees	0.7238	0.2762	0.7768	0.7238	0.7524	0.7524	0.2476	0.4754	0.7338	0.6184	0.3816	0.6552	0.6184	0.6184	0.6184	0.3816	0.2368	0.6184
LADTree	GainRatio	100*	trees	0.7099	0.2901	0.7857	0.7099	0.7846	0.7846	0.2154	0.4888	0.7268	0.7184	0.2816	0.7241	0.7184	0.7034	0.7034	0.2966	0.4216	0.7071
MultiBoostAB	ReliefF	10	meta	0.6695	0.3305	0.75	0.6695	0.7298	0.7298	0.2702	0.3948	0.6813	0.5737	0.4263	0.6897	0.5737	0.6795	0.6795	0.3205	0.23	0.5538
MultiClassClassifier	ReliefF	10	meta	0.7373	0.2627	0.7857	0.7373	0.7622	0.7622	0.2378	0.4989	0.7466	0.5948	0.4053	0.6552	0.5948	0.6072	0.6072	0.3929	0.2015	0.5972
FilteredClassifier	ReliefF	10	meta	0.6901	0.3099	0.75	0.6901	0.7192	0.7192	0.2808	0.4082	0.6993	0.5237	0.4763	0.6552	0.5237	0.5834	0.5834	0.4167	0.0889	0.4747
LogitBoost	ReliefF	10	meta	0.6971	0.3029	0.7411	0.6971	0.7063	0.7063	0.2937	0.4033	0.701	0.6184	0.3816	0.6552	0.6184	0.6184	0.6184	0.3816	0.2368	0.6184
Decorate	ReliefF	10	meta	0.7169	0.2831	0.7768	0.7169	0.756	0.756	0.244	0.4713	0.7291	0.4421	0.5579	0.5172	0.4421	0.4345	0.4345	0.5655	-0.1231	0.4361
END	ReliefF	10	meta	0.6631	0.3369	0.7321	0.6631	0.6972	0.6972	0.3028	0.3586	0.6719	0.5395	0.4606	0.5517	0.5395	0.5361	0.5361	0.464	0.0755	0.5317
Bagging	ReliefF	10	meta	0.6897	0.3103	0.7679	0.6897	0.7572	0.7572	0.2428	0.4418	0.7041	0.4421	0.5579	0.5172	0.4421	0.4345	0.4345	0.5655	-0.1231	0.4361
Dagging	ReliefF	10	meta	0.7034	0.2966	0.7679	0.7034	0.746	0.746	0.254	0.4474	0.7156	0.5184	0.4816	0.5862	0.5184	0.5209	0.5209	0.4792	0.0392	0.5166
DecisionStump	InfoGain	30	trees	0.6712	0.3288	0.6696	0.6712	0.6532	0.6532	0.3468	0.3239	0.6523	0.6369	0.3631	0.5862	0.6369	0.6313	0.6313	0.3687	0.2681	0.5857
FT	InfoGain	30	trees	0.7575	0.2425	0.8036	0.7575	0.7845	0.7845	0.2155	0.5413	0.7677	0.7948	0.2053	0.7931	0.7948	0.7746	0.7746	0.2255	0.5689	0.7803
J48	InfoGain	30	trees	0.8186	0.1814	0.8304	0.8186	0.8069	0.8069	0.1931	0.6254	0.812	0.8184	0.1816	0.7931	0.8184	0.7881	0.7881	0.2119	0.6058	0.7868
J48graft	InfoGain	30	trees	0.7305	0.2695	0.7857	0.7305	0.7657	0.7657	0.2343	0.4949	0.7422	0.6447	0.3553	0.6897	0.6447	0.6528	0.6528	0.3472	0.2974	0.6478
LADTree	InfoGain	30	trees	0.7641	0.2359	0.8125	0.7641	0.798	0.798	0.202	0.5611	0.7764	0.8711	0.129	0.8621	0.8711	0.8456	0.8456	0.1544	0.7162	0.8536
LMT	InfoGain	30	trees	0.8117	0.1883	0.8304	0.8117	0.8076	0.8076	0.1924	0.6193	0.8096	0.7711	0.229	0.7931	0.7711	0.7711	0.7711	0.229	0.5421	0.7711
NBTree	InfoGain	30	trees	0.8587	0.1413	0.875	0.8587	0.8587	0.8587	0.1413	0.7175	0.8587	0.7421	0.2579	0.7241	0.7421	0.7191	0.7191	0.281	0.4606	0.7157
RandomForest	InfoGain	30	trees	0.8049	0.1951	0.8304	0.8049	0.8092	0.8092	0.1908	0.6141	0.8069	0.7184	0.2816	0.7241	0.7184	0.7034	0.7034	0.2966	0.4216	0.7071
DecisionTable	SymmerU	50	rules	0.6764	0.3236	0.75	0.6764	0.7251	0.7251	0.2749	0.3985	0.6878	0.7974	0.2027	0.8276	0.7974	0.8139	0.8139	0.1861	0.611	0.8043
BayesNet	OneR	100*	bayes	0.8184	0.1816	0.8393	0.8184	0.8184	0.8184	0.1816	0.6368	0.8184	0.7421	0.2579	0.7241	0.7421	0.7191	0.7191	0.281	0.4606	0.7157
VFI	SymmerU	10	misc	0.8452	0.1548	0.8661	0.8452	0.8501	0.8501	0.1499	0.6954	0.8476	0.7711	0.229	0.7931	0.7711	0.7711	0.7711	0.229	0.5421	0.7711
HyperPipes	SymmerU	10	misc	0.7328	0.2672	0.6696	0.7328	0.7159	0.7159	0.2841	0.4484	0.6683	0.529	0.4711	0.4138	0.529	0.555	0.555	0.445	0.0798	0.3876
BayesianLogisticRegression	OneR	100*	bayes	0.5858	0.4142	0.4911	0.5858	0.6012	0.6012	0.3988	0.1863	0.4878	0.5263	0.4737	0.3793	0.5263	0.6786	0.6786	0.3215	0.1371	0.3132
LogitBoost	SymmerU	10	meta	0.8519	0.1481	0.875	0.8519	0.8623	0.8623	0.1377	0.7142	0.8567	0.7184	0.2816	0.7241	0.7184	0.7034	0.7034	0.2966	0.4216	0.7071
FilteredClassifier	SymmerU	10	meta	0.771	0.229	0.8125	0.771	0.7938	0.7938	0.2063	0.5643	0.7801	0.6211	0.379	0.6897	0.6211	0.6494	0.6494	0.3507	0.2689	0.6256
MultiClassClassifier	SymmerU	10	meta	0.8384	0.1616	0.8661	0.8384	0.8541	0.8541	0.1459	0.6923	0.8453	0.6948	0.3053	0.7241	0.6948	0.6948	0.6948	0.3053	0.3895	0.6948
MultiBoostAB	SymmerU	10	meta	0.7575	0.2425	0.8036	0.7575	0.7845	0.7845	0.2155	0.5413	0.7677	0.7448	0.2552	0.7586	0.7448	0.7349	0.7349	0.2652	0.4795	0.7388
Dagging	SymmerU	10	meta	0.7908	0.2092	0.8482	0.7908	0.8609	0.8609	0.1391	0.6479	0.8123	0.6474	0.3527	0.7241	0.6474	0.7029	0.7029	0.2971	0.3458	0.6547
Bagging	SymmerU	10	meta	0.7978	0.2022	0.8393	0.7978	0.8292	0.8292	0.1708	0.6262	0.81	0.6974	0.3026	0.7586	0.6974	0.7435	0.7435	0.2565	0.4385	0.7088
END	SymmerU	10	meta	0.7514	0.2486	0.7679	0.7514	0.7396	0.7396	0.2604	0.4908	0.7443	0.7448	0.2552	0.7586	0.7448	0.7349	0.7349	0.2652	0.4795	0.7388
Decorate	SymmerU	10	meta	0.8245	0.1755	0.875	0.8245	0.8924	0.8924	0.1076	0.7137	0.8469	0.7474	0.2527	0.7931	0.7474	0.7797	0.7797	0.2203	0.5261	0.7584
VotedPerceptron	InfoGain	50	functions	0.6223	0.3777	0.7143	0.6223	0.6777	0.6777	0.3223	0.2949	0.6278	0.5869	0.4132	0.5517	0.5869	0.5809	0.5809	0.4191	0.1676	0.5496
LMT	OneR	100*	trees	0.8319	0.1681	0.8482	0.8319	0.8275	0.8275	0.1725	0.6594	0.8296	0.7711	0.229	0.7931	0.7711	0.7711	0.7711	0.229	0.5421	0.7711
NBTree	OneR	100*	trees	0.751	0.249	0.7857	0.751	0.7584	0.7584	0.2416	0.5094	0.7544	0.6421	0.3579	0.6552	0.6421	0.6324	0.6324	0.3677	0.2743	0.6339
KStar	InfoGain	50	lazy	0.669	0.331	0.7768	0.669	0.8418	0.8418	0.1582	0.4807	0.6826	0.7974	0.2027	0.8276	0.7974	0.8139	0.8139	0.1861	0.611	0.8043
MultilayerPerceptron	InfoGain	50	functions	0.8186	0.1814	0.8304	0.8186	0.8069	0.8069	0.1931	0.6254	0.812	0.8974	0.1027	0.8966	0.8974	0.8813	0.8813	0.1187	0.7785	0.888
RBFNetwork	InfoGain	50	functions	0.8387	0.1613	0.8482	0.8387	0.8264	0.8264	0.1736	0.665	0.8318	0.8184	0.1816	0.7931	0.8184	0.7881	0.7881	0.2119	0.6058	0.7868
J48	OneR	100*	trees	0.7917	0.2083	0.8036	0.7917	0.7781	0.7781	0.2219	0.5696	0.7836	0.7448	0.2552	0.7586	0.7448	0.7349	0.7349	0.2652	0.4795	0.7388
SPegasos	InfoGain	50	functions	0.6429	0.3571	0.7143	0.6429	0.6728	0.6728	0.3272	0.3142	0.65	0.5079	0.4921	0.4483	0.5079	0.5084	0.5084	0.4917	0.0162	0.4477
VFI	ReliefF	30	misc	0.7512	0.2488	0.7768	0.7512	0.7479	0.7479	0.2521	0.499	0.7494	0.5395	0.4606	0.5517	0.5395	0.5361	0.5361	0.464	0.0755	0.5317
BayesianLogisticRegression	InfoGain	50	bayes	0.7508	0.2492	0.7946	0.7508	0.7719	0.7719	0.2281	0.5223	0.7591	0.7474	0.2527	0.7931	0.7474	0.7797	0.7797	0.2203	0.5261	0.7584
RandomTree	OneR	100*	trees	0.7175	0.2825	0.75	0.7175	0.7175	0.7175	0.2825	0.435	0.7175	0.7448	0.2552	0.7586	0.7448	0.7349	0.7349	0.2652	0.4795	0.7388
AdaBoostM1	InfoGain	50	meta	0.7849	0.2151	0.8036	0.7849	0.7777	0.7777	0.2223	0.5625	0.7809	0.7211	0.279	0.7586	0.7211	0.7333	0.7333	0.2667	0.4542	0.7261
BayesNet	InfoGain	50	bayes	0.8587	0.1413	0.875	0.8587	0.8587	0.8587	0.1413	0.7175	0.8587	0.8211	0.179	0.8276	0.8211	0.8081	0.8081	0.1919	0.629	0.8134
LWL	ReliefF	100*	lazy	0.7782	0.2218	0.7946	0.7782	0.7681	0.7681	0.2319	0.5462	0.7724	0.7974	0.2027	0.8276	0.7974	0.8139	0.8139	0.1861	0.611	0.8043
AdaBoostM1	ReliefF	100*	meta	0.7506	0.2494	0.8036	0.7506	0.7889	0.7889	0.2111	0.5382	0.7637	0.7474	0.2527	0.7931	0.7474	0.7797	0.7797	0.2203	0.5261	0.7584
VotedPerceptron	ReliefF	100*	functions	0.6769	0.3231	0.7232	0.6769	0.6851	0.6851	0.3149	0.362	0.6804	0.7184	0.2816	0.7241	0.7184	0.7034	0.7034	0.2966	0.4216	0.7071
IB1	ReliefF	100*	lazy	0.6422	0.3578	0.75	0.6422	0.7711	0.7711	0.2289	0.3927	0.6494	0.7237	0.2763	0.7931	0.7237	0.8079	0.8079	0.1921	0.5249	0.7411
IBk	ReliefF	100*	lazy	0.6422	0.3578	0.75	0.6422	0.7711	0.7711	0.2289	0.3927	0.6494	0.7237	0.2763	0.7931	0.7237	0.8079	0.8079	0.1921	0.5249	0.7411
ComplementNaiveBayes	OneR	100*	bayes	0.7447	0.2553	0.7589	0.7447	0.731	0.731	0.269	0.4754	0.736	0.5369	0.4632	0.5172	0.5369	0.5337	0.5337	0.4664	0.0704	0.512
BayesNet	ReliefF	50	bayes	0.7782	0.2218	0.7946	0.7782	0.7681	0.7681	0.2319	0.5462	0.7724	0.6184	0.3816	0.6552	0.6184	0.6184	0.6184	0.3816	0.2368	0.6184
RBFNetwork	ReliefF	100*	functions	0.8863	0.1137	0.8661	0.8863	0.849	0.849	0.151	0.7343	0.8578	0.7684	0.2316	0.7586	0.7684	0.7452	0.7452	0.2548	0.5131	0.7479
SimpleLogistic	ReliefF	100*	functions	0.818	0.182	0.8571	0.818	0.8515	0.8515	0.1485	0.6686	0.8311	0.8237	0.1763	0.8621	0.8237	0.8661	0.8661	0.134	0.6885	0.8389
SPegasos	ReliefF	100*	functions	0.5	0.5	0.6696	0.5	-0.1652	-0.1652	0.6652	-1	0.4011	0.5	0.5	0.6552	0.5	0.3276	0.3276	0.6724	-1	0.3959
RandomTree	GainRatio	10	trees	0.798	0.202	0.8304	0.798	0.8118	0.8118	0.1882	0.6097	0.8041	0.5132	0.4869	0.5172	0.5132	0.5119	0.5119	0.4881	0.025	0.5024
REPTree	GainRatio	10	trees	0.6903	0.3097	0.7411	0.6903	0.7063	0.7063	0.2938	0.3962	0.6963	0.571	0.429	0.6552	0.571	0.5979	0.5979	0.4022	0.1667	0.5685
J48	GainRatio	10	trees	0.8321	0.1679	0.8393	0.8321	0.8166	0.8166	0.1834	0.6484	0.823	0.6447	0.3553	0.6897	0.6447	0.6528	0.6528	0.3472	0.2974	0.6478
J48graft	GainRatio	10	trees	0.7777	0.2223	0.8214	0.7777	0.8068	0.8068	0.1932	0.5838	0.7888	0.671	0.329	0.7241	0.671	0.6935	0.6935	0.3066	0.3638	0.6778
DecisionStump	GainRatio	10	trees	0.5407	0.4593	0.6875	0.5407	0.6777	0.6777	0.3223	0.1701	0.4963	0.5974	0.4026	0.6897	0.5974	0.6542	0.6542	0.3459	0.245	0.5954
FT	GainRatio	10	trees	0.8317	0.1683	0.8571	0.8317	0.8416	0.8416	0.1584	0.6732	0.8363	0.6684	0.3316	0.6897	0.6684	0.6617	0.6617	0.3384	0.33	0.6641
NBTree	GainRatio	10	trees	0.865	0.135	0.9018	0.865	0.9118	0.9118	0.0882	0.7754	0.8829	0.5421	0.4579	0.5862	0.5421	0.5421	0.5421	0.4579	0.0842	0.5421
RandomForest	GainRatio	10	trees	0.8924	0.1076	0.9018	0.8924	0.8873	0.8873	0.1127	0.7797	0.8898	0.5158	0.4842	0.5517	0.5158	0.5152	0.5152	0.4849	0.0309	0.5148
LADTree	GainRatio	10	trees	0.8252	0.1748	0.8393	0.8252	0.817	0.817	0.183	0.6422	0.8208	0.4895	0.5105	0.5172	0.4895	0.4902	0.4902	0.5098	-0.0203	0.4873
LMT	GainRatio	10	trees	0.744	0.256	0.7946	0.744	0.7752	0.7752	0.2248	0.5182	0.7551	0.5921	0.4079	0.6207	0.5921	0.5883	0.5883	0.4117	0.1805	0.5895
DecisionTable	OneR	100*	rules	0.6901	0.3099	0.75	0.6901	0.7192	0.7192	0.2808	0.4082	0.6993	0.7711	0.229	0.7931	0.7711	0.7711	0.7711	0.229	0.5421	0.7711
ConjunctiveRule	OneR	100*	rules	0.5886	0.4114	0.6875	0.5886	0.6337	0.6337	0.3663	0.2177	0.5882	0.5	0.5	0.6552	0.5	0.3276	0.3276	0.6724	-1	0.3959
NNge	OneR	100*	rules	0.7987	0.2013	0.7946	0.7987	0.7731	0.7731	0.2269	0.5712	0.7799	0.6132	0.3869	0.5862	0.6132	0.6034	0.6034	0.3967	0.2163	0.5818
DTNB	OneR	100*	rules	0.805	0.195	0.8214	0.805	0.7973	0.7973	0.2027	0.6023	0.8009	0.7711	0.229	0.7931	0.7711	0.7711	0.7711	0.229	0.5421	0.7711
PART	OneR	100*	rules	0.785	0.215	0.7946	0.785	0.769	0.769	0.231	0.5539	0.7751	0.7211	0.279	0.7586	0.7211	0.7333	0.7333	0.2667	0.4542	0.7261
OneR	OneR	100*	rules	0.6771	0.3229	0.7143	0.6771	0.6771	0.6771	0.3229	0.3542	0.6771	0.6737	0.3263	0.7586	0.6737	0.775	0.775	0.225	0.4371	0.6853
ZeroR	OneR	100*	rules	0.5	0.5	0.6696	0.5	-0.1652	-0.1652	0.6652	-1	0.4011	0.5	0.5	0.6552	0.5	0.3276	0.3276	0.6724	-1	0.3959
Ridor	OneR	100*	rules	0.6834	0.3166	0.7411	0.6834	0.7069	0.7069	0.2931	0.3896	0.6912	0.4921	0.5079	0.5517	0.4921	0.4917	0.4917	0.5084	-0.0162	0.4913
BFTree	OneR	100*	trees	0.6838	0.3162	0.7232	0.6838	0.6864	0.6864	0.3136	0.3702	0.685	0.7711	0.229	0.7931	0.7711	0.7711	0.7711	0.229	0.5421	0.7711
ADTree	OneR	100*	trees	0.7169	0.2831	0.7768	0.7169	0.756	0.756	0.244	0.4713	0.7291	0.8211	0.179	0.8276	0.8211	0.8081	0.8081	0.1919	0.629	0.8134
Logistic	ReliefF	50	functions	0.7578	0.2422	0.7857	0.7578	0.7578	0.7578	0.2422	0.5157	0.7578	0.3894	0.6106	0.4483	0.3894	0.3894	0.3894	0.6106	-0.2211	0.3894
DecisionStump	ReliefF	30	trees	0.6832	0.3168	0.75	0.6832	0.7216	0.7216	0.2784	0.403	0.6938	0.6237	0.3763	0.7241	0.6237	0.735	0.735	0.265	0.341	0.6234
J48graft	ReliefF	30	trees	0.7236	0.2764	0.7857	0.7236	0.7704	0.7704	0.2296	0.4918	0.7375	0.5974	0.4026	0.6897	0.5974	0.6542	0.6542	0.3459	0.245	0.5954
BayesianLogisticRegression	ReliefF	50	bayes	0.5598	0.4402	0.4196	0.5598	0.6383	0.6383	0.3617	0.1819	0.3892	0.5527	0.4474	0.4138	0.5527	0.6852	0.6852	0.3148	0.1974	0.3655
DMNBtext	ReliefF	50	bayes	0.622	0.378	0.7321	0.622	0.7326	0.7326	0.2674	0.3369	0.6243	0.6	0.4	0.7241	0.6	0.8519	0.8519	0.1482	0.3752	0.5797
LADTree	ReliefF	30	trees	0.771	0.229	0.8125	0.771	0.7938	0.7938	0.2063	0.5643	0.7801	0.6211	0.379	0.6897	0.6211	0.6494	0.6494	0.3507	0.2689	0.6256
NaiveBayesMultinomialUpdateable	ReliefF	50	bayes	0.6301	0.3699	0.6696	0.6301	0.6284	0.6284	0.3716	0.2585	0.6292	0.5369	0.4632	0.5172	0.5369	0.5337	0.5337	0.4664	0.0704	0.512
NBTree	ReliefF	30	trees	0.7438	0.2562	0.8036	0.7438	0.7948	0.7948	0.2052	0.5361	0.7594	0.6211	0.379	0.6897	0.6211	0.6494	0.6494	0.3507	0.2689	0.6256
LibSVM	ReliefF	50	functions	0.5	0.5	0.6696	0.5	-0.1652	-0.1652	0.6652	-1	0.4011	0.5	0.5	0.6552	0.5	0.3276	0.3276	0.6724	-1	0.3959
RandomTree	ReliefF	30	trees	0.6908	0.3092	0.7143	0.6908	0.6819	0.6819	0.3181	0.3726	0.6853	0.6684	0.3316	0.6897	0.6684	0.6617	0.6617	0.3384	0.33	0.6641
PART	InfoGain	100*	rules	0.7375	0.2625	0.7768	0.7375	0.7485	0.7485	0.2515	0.4858	0.7422	0.7421	0.2579	0.7241	0.7421	0.7191	0.7191	0.281	0.4606	0.7157
OneR	ReliefF	30	rules	0.6292	0.3708	0.7143	0.6292	0.6751	0.6751	0.3249	0.3008	0.6358	0.6737	0.3263	0.7586	0.6737	0.775	0.775	0.225	0.4371	0.6853
PART	ReliefF	30	rules	0.8186	0.1814	0.8304	0.8186	0.8069	0.8069	0.1931	0.6254	0.812	0.6184	0.3816	0.6552	0.6184	0.6184	0.6184	0.3816	0.2368	0.6184
Ridor	ReliefF	30	rules	0.7308	0.2692	0.7679	0.7308	0.7377	0.7377	0.2623	0.4684	0.7339	0.5737	0.4263	0.6897	0.5737	0.6795	0.6795	0.3205	0.23	0.5538
OneR	InfoGain	100*	rules	0.5557	0.4443	0.625	0.5557	0.5615	0.5615	0.4385	0.1171	0.5566	0.6447	0.3553	0.6897	0.6447	0.6528	0.6528	0.3472	0.2974	0.6478
ConjunctiveRule	ReliefF	30	rules	0.6706	0.3294	0.6964	0.6706	0.6627	0.6627	0.3373	0.3332	0.6656	0.6237	0.3763	0.7241	0.6237	0.735	0.735	0.265	0.341	0.6234
DecisionTable	ReliefF	30	rules	0.6906	0.3094	0.7232	0.6906	0.6881	0.6881	0.3119	0.3787	0.6893	0.6184	0.3816	0.6552	0.6184	0.6184	0.6184	0.3816	0.2368	0.6184
DTNB	ReliefF	30	rules	0.751	0.249	0.7857	0.751	0.7584	0.7584	0.2416	0.5094	0.7544	0.6447	0.3553	0.6897	0.6447	0.6528	0.6528	0.3472	0.2974	0.6478
NNge	ReliefF	30	rules	0.7321	0.2679	0.7054	0.7321	0.7054	0.7054	0.2946	0.4366	0.6966	0.6369	0.3631	0.5862	0.6369	0.6313	0.6313	0.3687	0.2681	0.5857
NNge	InfoGain	100*	rules	0.8324	0.1676	0.8214	0.8324	0.802	0.802	0.198	0.6337	0.8095	0.6895	0.3106	0.6552	0.6895	0.6731	0.6731	0.3269	0.3622	0.6515
ADTree	ReliefF	30	trees	0.6494	0.3506	0.7321	0.6494	0.7025	0.7025	0.2975	0.3478	0.6585	0.7474	0.2527	0.7931	0.7474	0.7797	0.7797	0.2203	0.5261	0.7584
BFTree	ReliefF	30	trees	0.6695	0.3305	0.75	0.6695	0.7298	0.7298	0.2702	0.3948	0.6813	0.5948	0.4053	0.6552	0.5948	0.6072	0.6072	0.3929	0.2015	0.5972
DTNB	InfoGain	100*	rules	0.6975	0.3025	0.7232	0.6975	0.6903	0.6903	0.3097	0.3877	0.6933	0.6948	0.3053	0.7241	0.6948	0.6948	0.6948	0.3053	0.3895	0.6948
SimpleLogistic	OneR	50	functions	0.8119	0.1881	0.8214	0.8119	0.7973	0.7973	0.2027	0.609	0.8033	0.8711	0.129	0.8621	0.8711	0.8456	0.8456	0.1544	0.7162	0.8536
FT	OneR	30	trees	0.785	0.215	0.7946	0.785	0.769	0.769	0.231	0.5539	0.7751	0.8974	0.1027	0.8966	0.8974	0.8813	0.8813	0.1187	0.7785	0.888
DecisionTable	InfoGain	100*	rules	0.6905	0.3095	0.7321	0.6905	0.6961	0.6961	0.3039	0.3865	0.693	0.6948	0.3053	0.7241	0.6948	0.6948	0.6948	0.3053	0.3895	0.6948
SPegasos	OneR	50	functions	0.5	0.5	0.6696	0.5	-0.1652	-0.1652	0.6652	-1	0.4011	0.5	0.5	0.6552	0.5	0.3276	0.3276	0.6724	-1	0.3959
ConjunctiveRule	InfoGain	100*	rules	0.636	0.364	0.7143	0.636	0.6736	0.6736	0.3264	0.3073	0.6432	0.5	0.5	0.6552	0.5	0.3276	0.3276	0.6724	-1	0.3959
OneR	SymmerU	10	rules	0.704	0.296	0.7411	0.704	0.7069	0.7069	0.2931	0.4108	0.7053	0.6447	0.3553	0.6897	0.6447	0.6528	0.6528	0.3472	0.2974	0.6478
PART	SymmerU	10	rules	0.8319	0.1681	0.8482	0.8319	0.8275	0.8275	0.1725	0.6594	0.8296	0.7158	0.2842	0.6897	0.7158	0.6952	0.6952	0.3048	0.4105	0.6837
KStar	GainRatio	30	lazy	0.5274	0.4726	0.6696	0.5274	0.5913	0.5913	0.4087	0.1	0.4855	0.7	0.3	0.7931	0.7	0.88	0.88	0.12	0.5514	0.7175
BFTree	SymmerU	30	trees	0.6836	0.3164	0.7321	0.6836	0.6954	0.6954	0.3046	0.3789	0.6883	0.6948	0.3053	0.7241	0.6948	0.6948	0.6948	0.3053	0.3895	0.6948
ADTree	SymmerU	30	trees	0.7306	0.2694	0.7768	0.7306	0.75	0.75	0.25	0.4802	0.7382	0.6447	0.3553	0.6897	0.6447	0.6528	0.6528	0.3472	0.2974	0.6478
ZeroR	SymmerU	30	rules	0.5	0.5	0.6696	0.5	-0.1652	-0.1652	0.6652	-1	0.4011	0.5	0.5	0.6552	0.5	0.3276	0.3276	0.6724	-1	0.3959
Ridor	SymmerU	30	rules	0.7377	0.2623	0.7679	0.7377	0.7377	0.7377	0.2623	0.4753	0.7377	0.6474	0.3527	0.7241	0.6474	0.7029	0.7029	0.2971	0.3458	0.6547
PART	SymmerU	30	rules	0.7917	0.2083	0.8036	0.7917	0.7781	0.7781	0.2219	0.5696	0.7836	0.7421	0.2579	0.7241	0.7421	0.7191	0.7191	0.281	0.4606	0.7157
OneR	SymmerU	30	rules	0.5962	0.4038	0.6518	0.5962	0.6007	0.6007	0.3993	0.1968	0.5979	0.6447	0.3553	0.6897	0.6447	0.6528	0.6528	0.3472	0.2974	0.6478
NNge	SymmerU	30	rules	0.8661	0.1339	0.8482	0.8661	0.8307	0.8307	0.1693	0.696	0.8388	0.6869	0.3132	0.6207	0.6869	0.6869	0.6869	0.3132	0.3737	0.6207
DTNB	SymmerU	30	rules	0.7978	0.2022	0.8393	0.7978	0.8292	0.8292	0.1708	0.6262	0.81	0.7711	0.229	0.7931	0.7711	0.7711	0.7711	0.229	0.5421	0.7711
DecisionTable	SymmerU	30	rules	0.7306	0.2694	0.7768	0.7306	0.75	0.75	0.25	0.4802	0.7382	0.6684	0.3316	0.6897	0.6684	0.6617	0.6617	0.3384	0.33	0.6641
ConjunctiveRule	SymmerU	30	rules	0.6973	0.3027	0.7321	0.6973	0.6973	0.6973	0.3027	0.3946	0.6973	0.6237	0.3763	0.7241	0.6237	0.735	0.735	0.265	0.341	0.6234
REPTree	GainRatio	30	trees	0.6559	0.3441	0.75	0.6559	0.7448	0.7448	0.2552	0.3906	0.6667	0.5684	0.4316	0.6207	0.5684	0.5722	0.5722	0.4278	0.1406	0.5695
RandomTree	GainRatio	30	trees	0.7303	0.2697	0.7946	0.7303	0.7858	0.7858	0.2142	0.5131	0.746	0.7158	0.2842	0.6897	0.7158	0.6952	0.6952	0.3048	0.4105	0.6837
VotedPerceptron	OneR	50	functions	0.6359	0.3641	0.7232	0.6359	0.6904	0.6904	0.3096	0.3217	0.6433	0.4948	0.5053	0.5862	0.4948	0.4928	0.4928	0.5073	-0.0124	0.4822
J48graft	GainRatio	30	trees	0.7305	0.2695	0.7857	0.7305	0.7657	0.7657	0.2343	0.4949	0.7422	0.6948	0.3053	0.7241	0.6948	0.6948	0.6948	0.3053	0.3895	0.6948
J48	GainRatio	30	trees	0.7712	0.2288	0.8036	0.7712	0.7792	0.7792	0.2208	0.5503	0.7749	0.7448	0.2552	0.7586	0.7448	0.7349	0.7349	0.2652	0.4795	0.7388
FT	GainRatio	30	trees	0.8382	0.1618	0.875	0.8382	0.8738	0.8738	0.1262	0.7111	0.8522	0.6421	0.3579	0.6552	0.6421	0.6324	0.6324	0.3677	0.2743	0.6339
DecisionStump	GainRatio	30	trees	0.6153	0.3847	0.7232	0.6153	0.7083	0.7083	0.2917	0.31	0.6169	0.6237	0.3763	0.7241	0.6237	0.735	0.735	0.265	0.341	0.6234
RandomForest	GainRatio	30	trees	0.8384	0.1616	0.8661	0.8384	0.8541	0.8541	0.1459	0.6923	0.8453	0.6184	0.3816	0.6552	0.6184	0.6184	0.6184	0.3816	0.2368	0.6184
NBTree	GainRatio	30	trees	0.845	0.155	0.875	0.845	0.8673	0.8673	0.1327	0.712	0.8545	0.6684	0.3316	0.6897	0.6684	0.6617	0.6617	0.3384	0.33	0.6641
LMT	GainRatio	30	trees	0.8049	0.1951	0.8304	0.8049	0.8092	0.8092	0.1908	0.6141	0.8069	0.6421	0.3579	0.6552	0.6421	0.6324	0.6324	0.3677	0.2743	0.6339
LADTree	GainRatio	30	trees	0.7505	0.2495	0.8125	0.7505	0.8108	0.8108	0.1892	0.558	0.7681	0.6921	0.3079	0.6897	0.6921	0.6755	0.6755	0.3245	0.3672	0.6758
MultiClassClassifier	GainRatio	30	meta	0.8047	0.1953	0.8393	0.8047	0.8243	0.8243	0.1757	0.6287	0.813	0.6421	0.3579	0.6552	0.6421	0.6324	0.6324	0.3677	0.2743	0.6339
Logistic	OneR	100*	functions	0.7775	0.2225	0.8304	0.7775	0.8274	0.8274	0.1726	0.6028	0.7941	0.7448	0.2552	0.7586	0.7448	0.7349	0.7349	0.2652	0.4795	0.7388
IBk	OneR	100*	lazy	0.7097	0.2903	0.7946	0.7097	0.8163	0.8163	0.1837	0.5151	0.7294	0.7474	0.2527	0.7931	0.7474	0.7797	0.7797	0.2203	0.5261	0.7584
LADTree	InfoGain	100*	trees	0.6966	0.3034	0.7679	0.6966	0.7508	0.7508	0.2492	0.4441	0.7101	0.6184	0.3816	0.6552	0.6184	0.6184	0.6184	0.3816	0.2368	0.6184
VFI	SymmerU	50	misc	0.8795	0.1205	0.8661	0.8795	0.8468	0.8468	0.1532	0.7256	0.8564	0.6395	0.3606	0.6207	0.6395	0.6262	0.6262	0.3738	0.2653	0.6134
HyperPipes	SymmerU	50	misc	0.873	0.127	0.8482	0.873	0.8339	0.8339	0.1661	0.7058	0.8403	0.7131	0.2869	0.6552	0.7131	0.7046	0.7046	0.2955	0.4176	0.6548
END	SymmerU	50	meta	0.7919	0.2081	0.7946	0.7919	0.7707	0.7707	0.2293	0.5622	0.7776	0.5369	0.4632	0.5172	0.5369	0.5337	0.5337	0.4664	0.0704	0.512
Decorate	SymmerU	50	meta	0.8515	0.1485	0.8929	0.8515	0.9053	0.9053	0.0947	0.7549	0.8711	0.7448	0.2552	0.7586	0.7448	0.7349	0.7349	0.2652	0.4795	0.7388
Dagging	SymmerU	50	meta	0.8382	0.1618	0.875	0.8382	0.8738	0.8738	0.1262	0.7111	0.8522	0.7948	0.2053	0.7931	0.7948	0.7746	0.7746	0.2255	0.5689	0.7803
Bagging	SymmerU	50	meta	0.764	0.236	0.8214	0.764	0.8192	0.8192	0.1808	0.5805	0.7813	0.7974	0.2027	0.8276	0.7974	0.8139	0.8139	0.1861	0.611	0.8043
MultiClassClassifier	SymmerU	50	meta	0.8114	0.1886	0.8482	0.8114	0.8375	0.8375	0.1625	0.6483	0.822	0.6184	0.3816	0.6552	0.6184	0.6184	0.6184	0.3816	0.2368	0.6184
MultiBoostAB	SymmerU	50	meta	0.7843	0.2157	0.8304	0.7843	0.8207	0.8207	0.1793	0.604	0.7977	0.6921	0.3079	0.6897	0.6921	0.6755	0.6755	0.3245	0.3672	0.6758
LogitBoost	SymmerU	50	meta	0.8045	0.1955	0.8482	0.8045	0.8435	0.8435	0.1565	0.6468	0.819	0.7684	0.2316	0.7586	0.7684	0.7452	0.7452	0.2548	0.5131	0.7479
FilteredClassifier	SymmerU	50	meta	0.8119	0.1881	0.8214	0.8119	0.7973	0.7973	0.2027	0.609	0.8033	0.4606	0.5395	0.4483	0.4606	0.464	0.464	0.5361	-0.0755	0.4423
SPegasos	SymmerU	100*	functions	0.5	0.5	0.6696	0.5	-0.1652	-0.1652	0.6652	-1	0.4011	0.5	0.5	0.6552	0.5	0.3276	0.3276	0.6724	-1	0.3959
LMT	OneR	50	trees	0.805	0.195	0.8214	0.805	0.7973	0.7973	0.2027	0.6023	0.8009	0.8711	0.129	0.8621	0.8711	0.8456	0.8456	0.1544	0.7162	0.8536
MultilayerPerceptron	GainRatio	100*	functions	0.8314	0.1686	0.875	0.8314	0.882	0.882	0.118	0.7116	0.8496	0.7421	0.2579	0.7241	0.7421	0.7191	0.7191	0.281	0.4606	0.7157
MultilayerPerceptron	SymmerU	100*	functions	0.8584	0.1416	0.8929	0.8584	0.8961	0.8961	0.1039	0.7535	0.8733	0.7948	0.2053	0.7931	0.7948	0.7746	0.7746	0.2255	0.5689	0.7803
KStar	SymmerU	100*	lazy	0.5948	0.4052	0.7232	0.5948	0.7578	0.7578	0.2422	0.3126	0.5826	0.8	0.2	0.8621	0.8	0.9131	0.9131	0.087	0.704	0.8274
IBk	SymmerU	100*	lazy	0.6825	0.3175	0.7857	0.6825	0.8481	0.8481	0.1519	0.5041	0.6995	0.7974	0.2027	0.8276	0.7974	0.8139	0.8139	0.1861	0.611	0.8043
IB1	SymmerU	100*	lazy	0.6825	0.3175	0.7857	0.6825	0.8481	0.8481	0.1519	0.5041	0.6995	0.7974	0.2027	0.8276	0.7974	0.8139	0.8139	0.1861	0.611	0.8043
IB1	GainRatio	100*	lazy	0.6351	0.3649	0.7589	0.6351	0.8676	0.8676	0.1324	0.4458	0.6365	0.6737	0.3263	0.7586	0.6737	0.775	0.775	0.225	0.4371	0.6853
BayesNet	SymmerU	100*	bayes	0.8858	0.1142	0.8929	0.8858	0.876	0.876	0.124	0.7617	0.8805	0.7948	0.2053	0.7931	0.7948	0.7746	0.7746	0.2255	0.5689	0.7803
AdaBoostM1	SymmerU	100*	meta	0.7915	0.2085	0.8125	0.7915	0.7877	0.7877	0.2123	0.5792	0.7895	0.6447	0.3553	0.6897	0.6447	0.6528	0.6528	0.3472	0.2974	0.6478
LWL	SymmerU	100*	lazy	0.644	0.356	0.6607	0.644	0.6325	0.6325	0.3675	0.2762	0.6345	0.6948	0.3053	0.7241	0.6948	0.6948	0.6948	0.3053	0.3895	0.6948
LADTree	OneR	30	trees	0.7514	0.2486	0.7679	0.7514	0.7396	0.7396	0.2604	0.4908	0.7443	0.6211	0.379	0.6897	0.6211	0.6494	0.6494	0.3507	0.2689	0.6256
ConjunctiveRule	ReliefF	100*	rules	0.758	0.242	0.7768	0.758	0.7486	0.7486	0.2514	0.5065	0.7526	0.6237	0.3763	0.7241	0.6237	0.735	0.735	0.265	0.341	0.6234
NaiveBayesMultinomial	InfoGain	50	bayes	0.7514	0.2486	0.7679	0.7514	0.7396	0.7396	0.2604	0.4908	0.7443	0.6658	0.3342	0.6552	0.6658	0.65	0.65	0.35	0.3154	0.6446
NaiveBayesMultinomialUpdateable	InfoGain	50	bayes	0.7305	0.2695	0.7857	0.7305	0.7657	0.7657	0.2343	0.4949	0.7422	0.6184	0.3816	0.6552	0.6184	0.6184	0.6184	0.3816	0.2368	0.6184
ComplementNaiveBayes	InfoGain	50	bayes	0.7649	0.2351	0.7768	0.7649	0.75	0.75	0.25	0.5147	0.7556	0.6658	0.3342	0.6552	0.6658	0.65	0.65	0.35	0.3154	0.6446
NaiveBayes	OneR	100*	bayes	0.8321	0.1679	0.8393	0.8321	0.8166	0.8166	0.1834	0.6484	0.823	0.7684	0.2316	0.7586	0.7684	0.7452	0.7452	0.2548	0.5131	0.7479
NaiveBayesMultinomialUpdateable	OneR	100*	bayes	0.7175	0.2825	0.75	0.7175	0.7175	0.7175	0.2825	0.435	0.7175	0.5658	0.4342	0.5862	0.5658	0.5613	0.5613	0.4387	0.127	0.5606
NaiveBayesMultinomial	OneR	100*	bayes	0.7447	0.2553	0.7589	0.7447	0.731	0.731	0.269	0.4754	0.736	0.5369	0.4632	0.5172	0.5369	0.5337	0.5337	0.4664	0.0704	0.512
NaiveBayes	InfoGain	50	bayes	0.8117	0.1883	0.8304	0.8117	0.8076	0.8076	0.1924	0.6193	0.8096	0.8184	0.1816	0.7931	0.8184	0.7881	0.7881	0.2119	0.6058	0.7868
Logistic	InfoGain	50	functions	0.7512	0.2488	0.7768	0.7512	0.7479	0.7479	0.2521	0.499	0.7494	0.7184	0.2816	0.7241	0.7184	0.7034	0.7034	0.2966	0.4216	0.7071
LibSVM	OneR	100*	functions	0.5	0.5	0.6696	0.5	-0.1652	-0.1652	0.6652	-1	0.4011	0.5	0.5	0.6552	0.5	0.3276	0.3276	0.6724	-1	0.3959
LibSVM	InfoGain	50	functions	0.5	0.5	0.6696	0.5	-0.1652	-0.1652	0.6652	-1	0.4011	0.5	0.5	0.6552	0.5	0.3276	0.3276	0.6724	-1	0.3959
DecisionTable	ReliefF	100*	rules	0.758	0.242	0.7768	0.758	0.7486	0.7486	0.2514	0.5065	0.7526	0.6948	0.3053	0.7241	0.6948	0.6948	0.6948	0.3053	0.3895	0.6948
Dagging	ReliefF	50	meta	0.8452	0.1548	0.8661	0.8452	0.8501	0.8501	0.1499	0.6954	0.8476	0.7211	0.279	0.7586	0.7211	0.7333	0.7333	0.2667	0.4542	0.7261
J48graft	OneR	30	trees	0.7312	0.2688	0.75	0.7312	0.7204	0.7204	0.2796	0.4514	0.7246	0.6447	0.3553	0.6897	0.6447	0.6528	0.6528	0.3472	0.2974	0.6478
HyperPipes	ReliefF	50	misc	0.7924	0.2076	0.7679	0.7924	0.7595	0.7595	0.2405	0.551	0.7585	0.6132	0.3869	0.5862	0.6132	0.6034	0.6034	0.3967	0.2163	0.5818
VFI	ReliefF	50	misc	0.758	0.242	0.7768	0.758	0.7486	0.7486	0.2514	0.5065	0.7526	0.6369	0.3631	0.5862	0.6369	0.6313	0.6313	0.3687	0.2681	0.5857
RandomForest	OneR	50	trees	0.7647	0.2353	0.7857	0.7647	0.758	0.758	0.242	0.5226	0.761	0.6447	0.3553	0.6897	0.6447	0.6528	0.6528	0.3472	0.2974	0.6478
NBTree	OneR	50	trees	0.7578	0.2422	0.7857	0.7578	0.7578	0.7578	0.2422	0.5157	0.7578	0.6447	0.3553	0.6897	0.6447	0.6528	0.6528	0.3472	0.2974	0.6478
FT	OneR	50	trees	0.805	0.195	0.8214	0.805	0.7973	0.7973	0.2027	0.6023	0.8009	0.7948	0.2053	0.7931	0.7948	0.7746	0.7746	0.2255	0.5689	0.7803
DecisionStump	OneR	50	trees	0.6903	0.3097	0.7411	0.6903	0.7063	0.7063	0.2938	0.3962	0.6963	0.7474	0.2527	0.7931	0.7474	0.7797	0.7797	0.2203	0.5261	0.7584
J48graft	OneR	50	trees	0.6905	0.3095	0.7321	0.6905	0.6961	0.6961	0.3039	0.3865	0.693	0.7711	0.229	0.7931	0.7711	0.7711	0.7711	0.229	0.5421	0.7711
J48	OneR	50	trees	0.6977	0.3023	0.7143	0.6977	0.6849	0.6849	0.3151	0.3823	0.6889	0.7448	0.2552	0.7586	0.7448	0.7349	0.7349	0.2652	0.4795	0.7388
Bagging	ReliefF	50	meta	0.7031	0.2969	0.7857	0.7031	0.7949	0.7949	0.2051	0.4894	0.7208	0.7237	0.2763	0.7931	0.7237	0.8079	0.8079	0.1921	0.5249	0.7411
FilteredClassifier	ReliefF	50	meta	0.7708	0.2292	0.8214	0.7708	0.8122	0.8122	0.1878	0.5816	0.7852	0.6684	0.3316	0.6897	0.6684	0.6617	0.6617	0.3384	0.33	0.6641
Decorate	ReliefF	50	meta	0.7775	0.2225	0.8304	0.7775	0.8274	0.8274	0.1726	0.6028	0.7941	0.6474	0.3527	0.7241	0.6474	0.7029	0.7029	0.2971	0.3458	0.6547
END	ReliefF	50	meta	0.8387	0.1613	0.8482	0.8387	0.8264	0.8264	0.1736	0.665	0.8318	0.5948	0.4053	0.6552	0.5948	0.6072	0.6072	0.3929	0.2015	0.5972
REPTree	OneR	50	trees	0.6697	0.3303	0.7411	0.6697	0.7106	0.7106	0.2894	0.3782	0.6798	0.8211	0.179	0.8276	0.8211	0.8081	0.8081	0.1919	0.629	0.8134
LogitBoost	ReliefF	50	meta	0.7643	0.2357	0.8036	0.7643	0.7814	0.7814	0.2186	0.5454	0.7714	0.5921	0.4079	0.6207	0.5921	0.5883	0.5883	0.4117	0.1805	0.5895
MultiBoostAB	ReliefF	50	meta	0.6632	0.3368	0.7232	0.6632	0.6841	0.6841	0.3159	0.3468	0.6699	0.6184	0.3816	0.6552	0.6184	0.6184	0.6184	0.3816	0.2368	0.6184
RandomTree	OneR	50	trees	0.7043	0.2957	0.7232	0.7043	0.6929	0.6929	0.3071	0.397	0.6969	0.7394	0.2606	0.6897	0.7394	0.7231	0.7231	0.277	0.4622	0.6882
LogitBoost	ReliefF	100*	meta	0.7978	0.2022	0.8393	0.7978	0.8292	0.8292	0.1708	0.6262	0.81	0.671	0.329	0.7241	0.671	0.6935	0.6935	0.3066	0.3638	0.6778
FilteredClassifier	ReliefF	100*	meta	0.7175	0.2825	0.75	0.7175	0.7175	0.7175	0.2825	0.435	0.7175	0.5895	0.4106	0.5862	0.5895	0.581	0.581	0.4191	0.1702	0.5736
MultiClassClassifier	ReliefF	100*	meta	0.8117	0.1883	0.8304	0.8117	0.8076	0.8076	0.1924	0.6193	0.8096	0.5921	0.4079	0.6207	0.5921	0.5883	0.5883	0.4117	0.1805	0.5895
MultiBoostAB	ReliefF	100*	meta	0.6562	0.3438	0.7321	0.6562	0.6993	0.6993	0.3007	0.3529	0.6655	0.8237	0.1763	0.8621	0.8237	0.8661	0.8661	0.134	0.6885	0.8389
Dagging	ReliefF	100*	meta	0.8586	0.1414	0.8839	0.8586	0.8752	0.8752	0.1248	0.7336	0.866	0.7684	0.2316	0.7586	0.7684	0.7452	0.7452	0.2548	0.5131	0.7479
ADTree	ReliefF	50	trees	0.7103	0.2897	0.7679	0.7103	0.7424	0.7424	0.2576	0.4515	0.7208	0.6974	0.3026	0.7586	0.6974	0.7435	0.7435	0.2565	0.4385	0.7088
END	ReliefF	100*	meta	0.7038	0.2962	0.75	0.7038	0.7169	0.7169	0.2831	0.4205	0.7091	0.5921	0.4079	0.6207	0.5921	0.5883	0.5883	0.4117	0.1805	0.5895
Decorate	ReliefF	100*	meta	0.791	0.209	0.8393	0.791	0.8355	0.8355	0.1645	0.6249	0.8067	0.7737	0.2263	0.8276	0.7737	0.8377	0.8377	0.1624	0.608	0.7919
VotedPerceptron	GainRatio	10	functions	0.5746	0.4254	0.7054	0.5746	0.7029	0.7029	0.2971	0.2461	0.5557	0.5	0.5	0.6552	0.5	0.3276	0.3276	0.6724	-1	0.3959
MultiClassClassifier	ReliefF	50	meta	0.7578	0.2422	0.7857	0.7578	0.7578	0.7578	0.2422	0.5157	0.7578	0.3894	0.6106	0.4483	0.3894	0.3894	0.3894	0.6106	-0.2211	0.3894
VFI	ReliefF	100*	misc	0.7923	0.2077	0.7768	0.7923	0.7616	0.7616	0.2384	0.553	0.7651	0.5842	0.4158	0.5172	0.5842	0.5889	0.5889	0.4111	0.173	0.5167
HyperPipes	ReliefF	100*	misc	0.8589	0.1411	0.8661	0.8589	0.8458	0.8458	0.1542	0.7046	0.8516	0.6395	0.3606	0.6207	0.6395	0.6262	0.6262	0.3738	0.2653	0.6134
DMNBtext	OneR	100*	bayes	0.696	0.304	0.7946	0.696	0.8542	0.8542	0.1458	0.527	0.7158	0.6237	0.3763	0.7241	0.6237	0.735	0.735	0.265	0.341	0.6234
NaiveBayesMultinomialUpdateable	InfoGain	30	bayes	0.7441	0.2559	0.7857	0.7441	0.7599	0.7599	0.2401	0.5038	0.7506	0.5921	0.4079	0.6207	0.5921	0.5883	0.5883	0.4117	0.1805	0.5895
NaiveBayesMultinomial	InfoGain	30	bayes	0.7784	0.2216	0.7857	0.7784	0.7604	0.7604	0.2396	0.5384	0.7667	0.6395	0.3606	0.6207	0.6395	0.6262	0.6262	0.3738	0.2653	0.6134
DMNBtext	InfoGain	30	bayes	0.6895	0.3105	0.7768	0.6895	0.7859	0.7859	0.2141	0.4656	0.7059	0.7237	0.2763	0.7931	0.7237	0.8079	0.8079	0.1921	0.5249	0.7411
ComplementNaiveBayes	InfoGain	30	bayes	0.7784	0.2216	0.7857	0.7784	0.7604	0.7604	0.2396	0.5384	0.7667	0.6395	0.3606	0.6207	0.6395	0.6262	0.6262	0.3738	0.2653	0.6134
BayesNet	InfoGain	30	bayes	0.8656	0.1344	0.875	0.8656	0.8563	0.8563	0.1437	0.7219	0.8606	0.7421	0.2579	0.7241	0.7421	0.7191	0.7191	0.281	0.4606	0.7157
BayesianLogisticRegression	InfoGain	30	bayes	0.7393	0.2607	0.6875	0.7393	0.7161	0.7161	0.2839	0.4548	0.6845	0.6606	0.3394	0.5862	0.6606	0.6695	0.6695	0.3306	0.3299	0.5857
Logistic	InfoGain	30	functions	0.778	0.222	0.8036	0.778	0.778	0.778	0.222	0.556	0.778	0.7974	0.2027	0.8276	0.7974	0.8139	0.8139	0.1861	0.611	0.8043
NaiveBayes	InfoGain	30	bayes	0.8519	0.1481	0.875	0.8519	0.8623	0.8623	0.1377	0.7142	0.8567	0.8448	0.1553	0.8276	0.8448	0.8149	0.8149	0.1851	0.659	0.8199
LibSVM	InfoGain	30	functions	0.5	0.5	0.6696	0.5	-0.1652	-0.1652	0.6652	-1	0.4011	0.5	0.5	0.6552	0.5	0.3276	0.3276	0.6724	-1	0.3959
Bagging	GainRatio	30	meta	0.7434	0.2566	0.8214	0.7434	0.8535	0.8535	0.1465	0.5867	0.7673	0.6474	0.3527	0.7241	0.6474	0.7029	0.7029	0.2971	0.3458	0.6547
Bagging	ReliefF	100*	meta	0.6829	0.3171	0.7679	0.6829	0.7656	0.7656	0.2344	0.4408	0.6975	0.7737	0.2263	0.8276	0.7737	0.8377	0.8377	0.1624	0.608	0.7919
LibSVM	GainRatio	50	functions	0.5	0.5	0.6696	0.5	-0.1652	-0.1652	0.6652	-1	0.4011	0.5	0.5	0.6552	0.5	0.3276	0.3276	0.6724	-1	0.3959
ADTree	InfoGain	10	trees	0.7375	0.2625	0.7768	0.7375	0.7485	0.7485	0.2515	0.4858	0.7422	0.7211	0.279	0.7586	0.7211	0.7333	0.7333	0.2667	0.4542	0.7261
BFTree	InfoGain	10	trees	0.6703	0.3297	0.7143	0.6703	0.6753	0.6753	0.3247	0.3456	0.6725	0.6211	0.379	0.6897	0.6211	0.6494	0.6494	0.3507	0.2689	0.6256
OneR	InfoGain	10	rules	0.6297	0.3703	0.6875	0.6297	0.6406	0.6406	0.3594	0.2701	0.6335	0.6447	0.3553	0.6897	0.6447	0.6528	0.6528	0.3472	0.2974	0.6478
BayesianLogisticRegression	GainRatio	50	bayes	0.678	0.322	0.6696	0.678	0.6583	0.6583	0.3417	0.3358	0.6551	0.5053	0.4948	0.4138	0.5053	0.5073	0.5073	0.4928	0.0124	0.4024
Ridor	InfoGain	10	rules	0.7849	0.2151	0.8036	0.7849	0.7777	0.7777	0.2223	0.5625	0.7809	0.671	0.329	0.7241	0.671	0.6935	0.6935	0.3066	0.3638	0.6778
NaiveBayes	GainRatio	50	bayes	0.953	0.047	0.9554	0.953	0.947	0.947	0.053	0.9	0.9499	0.7684	0.2316	0.7586	0.7684	0.7452	0.7452	0.2548	0.5131	0.7479
NaiveBayesMultinomialUpdateable	GainRatio	50	bayes	0.7508	0.2492	0.7946	0.7508	0.7719	0.7719	0.2281	0.5223	0.7591	0.6421	0.3579	0.6552	0.6421	0.6324	0.6324	0.3677	0.2743	0.6339
NaiveBayesMultinomial	GainRatio	50	bayes	0.7512	0.2488	0.7768	0.7512	0.7479	0.7479	0.2521	0.499	0.7494	0.6395	0.3606	0.6207	0.6395	0.6262	0.6262	0.3738	0.2653	0.6134
DMNBtext	GainRatio	50	bayes	0.615	0.385	0.7411	0.615	0.8127	0.8127	0.1873	0.3792	0.6096	0.5737	0.4263	0.6897	0.5737	0.6795	0.6795	0.3205	0.23	0.5538
NNge	InfoGain	10	rules	0.7782	0.2218	0.7946	0.7782	0.7681	0.7681	0.2319	0.5462	0.7724	0.7921	0.2079	0.7586	0.7921	0.7643	0.7643	0.2357	0.5557	0.754
DTNB	OneR	10	rules	0.7775	0.2225	0.8304	0.7775	0.8274	0.8274	0.1726	0.6028	0.7941	0.671	0.329	0.7241	0.671	0.6935	0.6935	0.3066	0.3638	0.6778
NNge	OneR	10	rules	0.7714	0.2286	0.7946	0.7714	0.7678	0.7678	0.2322	0.5391	0.7695	0.7448	0.2552	0.7586	0.7448	0.7349	0.7349	0.2652	0.4795	0.7388
ConjunctiveRule	OneR	10	rules	0.5611	0.4389	0.6964	0.5611	0.6828	0.6828	0.3172	0.2114	0.5349	0.5	0.5	0.6552	0.5	0.3276	0.3276	0.6724	-1	0.3959
DecisionTable	OneR	10	rules	0.7108	0.2892	0.7411	0.7108	0.708	0.708	0.292	0.4188	0.7094	0.7448	0.2552	0.7586	0.7448	0.7349	0.7349	0.2652	0.4795	0.7388
VFI	InfoGain	50	misc	0.8117	0.1883	0.8304	0.8117	0.8076	0.8076	0.1924	0.6193	0.8096	0.7421	0.2579	0.7241	0.7421	0.7191	0.7191	0.281	0.4606	0.7157
ZeroR	OneR	10	rules	0.5	0.5	0.6696	0.5	-0.1652	-0.1652	0.6652	-1	0.4011	0.5	0.5	0.6552	0.5	0.3276	0.3276	0.6724	-1	0.3959
OneR	OneR	10	rules	0.6697	0.3303	0.7411	0.6697	0.7106	0.7106	0.2894	0.3782	0.6798	0.5184	0.4816	0.5862	0.5184	0.5209	0.5209	0.4792	0.0392	0.5166
PART	OneR	10	rules	0.7105	0.2895	0.7589	0.7105	0.7281	0.7281	0.2719	0.4382	0.7173	0.6447	0.3553	0.6897	0.6447	0.6528	0.6528	0.3472	0.2974	0.6478
LogitBoost	InfoGain	50	meta	0.7577	0.2423	0.7946	0.7577	0.7696	0.7696	0.2304	0.5271	0.7629	0.5921	0.4079	0.6207	0.5921	0.5883	0.5883	0.4117	0.1805	0.5895
FilteredClassifier	InfoGain	50	meta	0.778	0.222	0.8036	0.778	0.778	0.778	0.222	0.556	0.778	0.7394	0.2606	0.6897	0.7394	0.7231	0.7231	0.277	0.4622	0.6882
ADTree	OneR	10	trees	0.7236	0.2764	0.7857	0.7236	0.7704	0.7704	0.2296	0.4918	0.7375	0.7448	0.2552	0.7586	0.7448	0.7349	0.7349	0.2652	0.4795	0.7388
MultiBoostAB	InfoGain	50	meta	0.7849	0.2151	0.8036	0.7849	0.7777	0.7777	0.2223	0.5625	0.7809	0.6974	0.3026	0.7586	0.6974	0.7435	0.7435	0.2565	0.4385	0.7088
Dagging	InfoGain	50	meta	0.8047	0.1953	0.8393	0.8047	0.8243	0.8243	0.1757	0.6287	0.813	0.8474	0.1527	0.8621	0.8474	0.8474	0.8474	0.1527	0.6947	0.8474
Bagging	InfoGain	50	meta	0.7908	0.2092	0.8482	0.7908	0.8609	0.8609	0.1391	0.6479	0.8123	0.8474	0.1527	0.8621	0.8474	0.8474	0.8474	0.1527	0.6947	0.8474
END	InfoGain	50	meta	0.7312	0.2688	0.75	0.7312	0.7204	0.7204	0.2796	0.4514	0.7246	0.6658	0.3342	0.6552	0.6658	0.65	0.65	0.35	0.3154	0.6446
Decorate	InfoGain	50	meta	0.7708	0.2292	0.8214	0.7708	0.8122	0.8122	0.1878	0.5816	0.7852	0.8474	0.1527	0.8621	0.8474	0.8474	0.8474	0.1527	0.6947	0.8474
LWL	GainRatio	10	lazy	0.6692	0.3308	0.7679	0.6692	0.7907	0.7907	0.2093	0.4436	0.6828	0.5421	0.4579	0.5862	0.5421	0.5421	0.5421	0.4579	0.0842	0.5421
LibSVM	ReliefF	100*	functions	0.5	0.5	0.6696	0.5	-0.1652	-0.1652	0.6652	-1	0.4011	0.5	0.5	0.6552	0.5	0.3276	0.3276	0.6724	-1	0.3959
NaiveBayesMultinomial	ReliefF	100*	bayes	0.7384	0.2616	0.7321	0.7384	0.7143	0.7143	0.2857	0.452	0.7169	0.5369	0.4632	0.5172	0.5369	0.5337	0.5337	0.4664	0.0704	0.512
NaiveBayesMultinomialUpdateable	ReliefF	100*	bayes	0.7315	0.2685	0.7321	0.7315	0.7103	0.7103	0.2897	0.4413	0.7143	0.6421	0.3579	0.6552	0.6421	0.6324	0.6324	0.3677	0.2743	0.6339
ComplementNaiveBayes	ReliefF	100*	bayes	0.7384	0.2616	0.7321	0.7384	0.7143	0.7143	0.2857	0.452	0.7169	0.5369	0.4632	0.5172	0.5369	0.5337	0.5337	0.4664	0.0704	0.512
DMNBtext	ReliefF	100*	bayes	0.6894	0.3106	0.7857	0.6894	0.8254	0.8254	0.1746	0.4965	0.7072	0.6	0.4	0.7241	0.6	0.8519	0.8519	0.1482	0.3752	0.5797
BayesianLogisticRegression	ReliefF	100*	bayes	0.5679	0.4321	0.6964	0.5679	0.6697	0.6697	0.3303	0.2147	0.5492	0.5974	0.4026	0.6897	0.5974	0.6542	0.6542	0.3459	0.245	0.5954
BayesNet	ReliefF	100*	bayes	0.8186	0.1814	0.8304	0.8186	0.8069	0.8069	0.1931	0.6254	0.812	0.6395	0.3606	0.6207	0.6395	0.6262	0.6262	0.3738	0.2653	0.6134
NaiveBayes	ReliefF	100*	bayes	0.873	0.127	0.8482	0.873	0.8339	0.8339	0.1661	0.7058	0.8403	0.6132	0.3869	0.5862	0.6132	0.6034	0.6034	0.3967	0.2163	0.5818
Logistic	ReliefF	100*	functions	0.8117	0.1883	0.8304	0.8117	0.8076	0.8076	0.1924	0.6193	0.8096	0.5921	0.4079	0.6207	0.5921	0.5883	0.5883	0.4117	0.1805	0.5895
HyperPipes	GainRatio	50	misc	0.8332	0.1668	0.7857	0.8332	0.7957	0.7957	0.2043	0.6277	0.7813	0.6579	0.3421	0.5517	0.6579	0.7174	0.7174	0.2826	0.3705	0.5431
VFI	GainRatio	50	misc	0.9061	0.0939	0.9018	0.9061	0.8833	0.8833	0.1167	0.7891	0.8924	0.6632	0.3369	0.6207	0.6632	0.652	0.652	0.348	0.3149	0.6189
ZeroR	OneR	50	rules	0.5	0.5	0.6696	0.5	-0.1652	-0.1652	0.6652	-1	0.4011	0.5	0.5	0.6552	0.5	0.3276	0.3276	0.6724	-1	0.3959
Decorate	GainRatio	50	meta	0.8041	0.1959	0.8661	0.8041	0.8996	0.8996	0.1004	0.6973	0.831	0.6684	0.3316	0.6897	0.6684	0.6617	0.6617	0.3384	0.33	0.6641
END	GainRatio	50	meta	0.7982	0.2018	0.8214	0.7982	0.7982	0.7982	0.2018	0.5964	0.7982	0.5658	0.4342	0.5862	0.5658	0.5613	0.5613	0.4387	0.127	0.5606
Bagging	GainRatio	50	meta	0.7231	0.2769	0.8125	0.7231	0.8658	0.8658	0.1342	0.5713	0.747	0.6974	0.3026	0.7586	0.6974	0.7435	0.7435	0.2565	0.4385	0.7088
[truncated: 316 more rows]

## Sheet: KIRC-miRNA
#'_cv' means cross validation and '_ind' means independent test
[truncated: 981 more rows]

[truncated: 2 more sheets: OV-mRNA, OV-miRNA]
